# Supplementary material
Source: publisher figshare collection journal article supplement (https://acs.figshare.com/ndownloader/files/17801675)

## Supporting Information

### **Orthogonal Selectivity in C–H Olefination: Synthesis of Branched Vinylarene with Unactivated Aliphatic Substitution**

Soumitra Agasti,<sup>[a]</sup> Bhaskar Mondal,<sup>[b]</sup> Tapas Kumar Achar,<sup>[a]</sup> Soumya Kumar Sinha,<sup>[a]</sup> Anjana Sarala Suseelan,<sup>[a]</sup> Kalman J. Szabo,\*<sup>[c]</sup> Franziska Schoenebeck,\*<sup>[b]</sup> and Debabrata Maiti\*<sup>[a]</sup>

<sup>[a]</sup>Department of Chemistry, Indian Institute of Technology Bombay, Powai, Mumbai 400076, India.

<sup>[b]</sup>Institute of Organic Chemistry, RWTH Aachen University, Landoltweg 1, 52074 Aachen, Germany.

<sup>[c]</sup>Department of Organic Chemistry, Stockholm University, SE-10691, Stockholm, Sweden.

E-mail:

Debabrata Maiti: [dmaiti@chem.iitb.ac.in](mailto:dmaiti@chem.iitb.ac.in)

Franziska Schoenebeck: [franziska.schoenebeck@rwth-aachen.de](mailto:franziska.schoenebeck@rwth-aachen.de)

Kalman J Szabo: [kalman@organ.su.se](mailto:kalman@organ.su.se)

## Table of Contents

|          |                                                   | Page Number |
|----------|---------------------------------------------------|-------------|
| <b>1</b> | General information                               | S3          |
| <b>2</b> | Experimental section                              |             |
|          | 2.1 Optimization details                          | S4 – S7     |
|          | 2.2 General procedure                             | S7 – S8     |
|          | 2.3 Characterization data                         | S8 – S41    |
|          | 2.4 Mechanistic investigation                     | S41 – S55   |
|          | 2.5 Computational details                         | S55 – S57   |
|          | 2.6 X-ray crystallographic data                   | S58 – S60   |
|          | 2.7 References                                    | S60         |
| <b>3</b> | NMR ( <sup>1</sup> H and <sup>13</sup> C spectra) | S61 – S121  |



## 1. General information:

### Reagent information:

Unless otherwise stated, all the reactions were carried out in screw cap reaction tube with magnetic stirring under air atmosphere. All the palladium salts were purchased from Alfa Aesar and used directly for the reaction. Copper fluoride and copper carbonate were brought from Sigma-Aldrich Co. <sup>t</sup>BuOH was brought from Spectrochem and used directly.  $\alpha,\beta$ -alkenyl carboxylic acids were purchased from either Sigma-Aldrich Co. or Alfa Aesar and used without further purification. Neocuproine was purchased from Sigma-Aldrich Co. Phenyl acetic acid derivatives were brought from Sigma-Aldrich Co. All the other reagents were purchased from commercial source and used as received. For column chromatography silica gel (60-120 mesh and 100-200 mesh) was supplied from SRL Co. During elution petroleum ether and ethyl acetate mixture was used. Thin layer chromatography was performed on EMD Chemicals Si 60 F<sub>254</sub>. TLC plates (silica gel 60F<sub>254</sub>) were supplied from MERCK.

### Analytical information:

<sup>1</sup>H NMR, <sup>13</sup>C NMR spectroscopy, Gas chromatography mass spectra (GCMS) or HRMS were used to characterize all the isolated compounds. Copies of the <sup>1</sup>H NMR, <sup>13</sup>C NMR spectra were attached in this supporting information. All NMR spectra were recorded on a BRUKER 400 MHz or BRUKER 500 MHz instrument. All <sup>1</sup>H NMR spectra are reported in parts per million (ppm) downfield of TMS and were measured relative to residual CHCl<sub>3</sub> (7.26 ppm). All <sup>13</sup>C NMR spectra were reported in ppm relative to CDCl<sub>3</sub> (77.23 ppm) and were obtained with proton decoupling. Coupling constants, J, are reported in Hertz. All GC analyses were performed on a Agilent 7890A GC system connected with a FID detector using a J & W DB-1 column (10 m, 0.1 mm I.D.). All GCMS analyses were done by Agilent 7890A GC system connected with 5975C inert XL EI/CI MSD (with triple axis detector).

## 2. Experimental section:

### 2.1 Optimization details

*Initial reaction condition:*

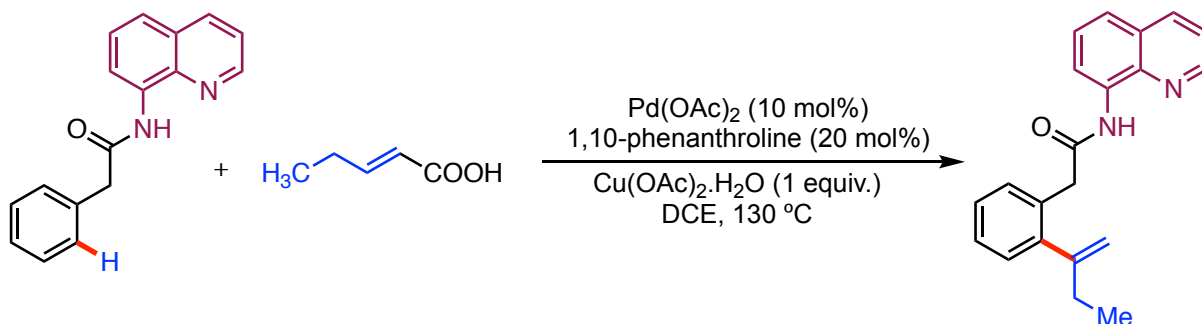

Branched olefinated product was obtained in 12% yield in the above mentioned condition. Then, optimization study was carried out by varying different parameters. Unless otherwise stated, 0.125 mmol of amide along with 0.25 mmol of 2-pentenoic acid were used for optimization purpose.

**Table S1:** Optimization of solvents

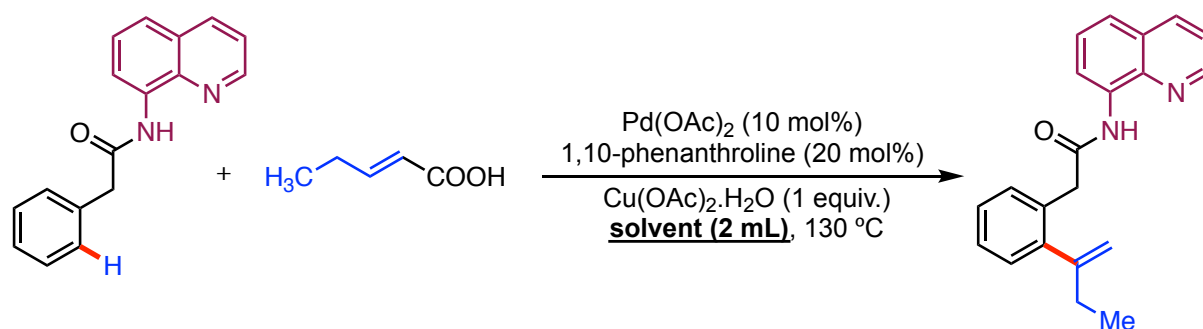

| Entry | Solvent                           | Yield (%) |
|-------|-----------------------------------|-----------|
| 1     | DCE                               | 12        |
| 2     | 1,4-dioxane                       | 13        |
| 3     | THF                               | 13        |
| 4     | Cyclohexane                       | 21        |
| 5     | Benzene                           | 23        |
| 6     | Isobutyl benzene                  | 18        |
| 7     | <i>p</i> -xylene                  | 1         |
| 8     | <i>m</i> -xylene                  | 18        |
| 9     | Mesitylene                        | 14        |
| 10    | TFT                               | 17        |
| 11    | <b><sup>t</sup>BuOH</b>           | <b>44</b> |
| 12    | $\text{CF}_3\text{CH}_2\text{OH}$ | 12        |
| 13    | Isopropanol                       | 7         |
| 14    | HFIP                              | 11        |
| 15    | NMP                               | 17        |

**Table S2: Ligand optimization**

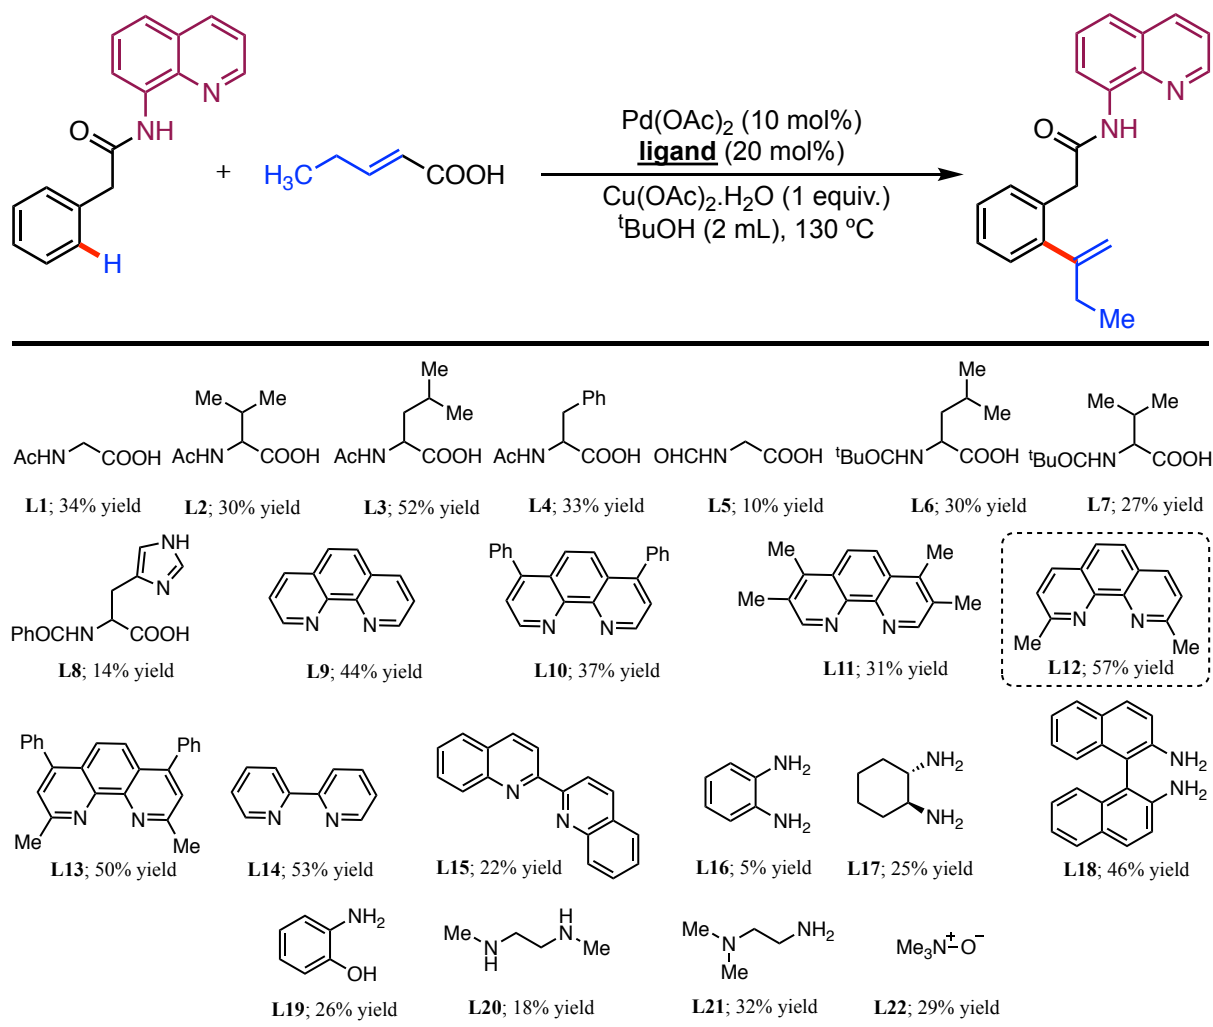

**Table S3 and S4: Oxidant optimization**

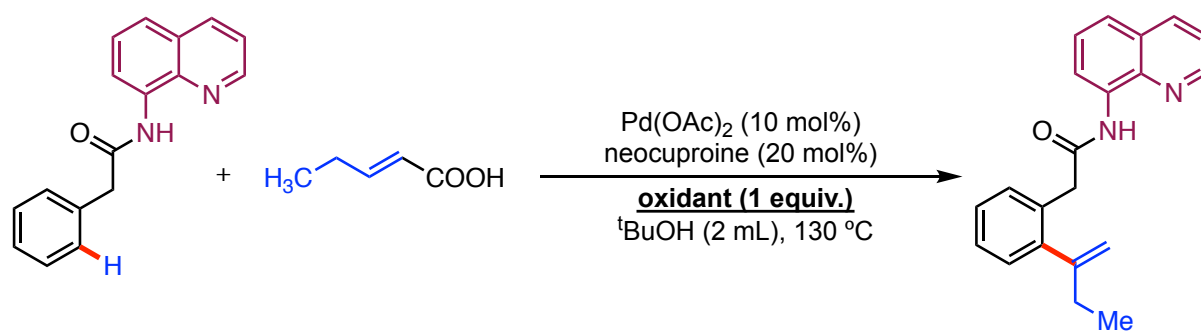

**Table S3**

| Entry | Oxidant                                  | Yield (%) |
|-------|------------------------------------------|-----------|
| 1     | $\text{CuF}_2 \cdot x\text{H}_2\text{O}$ | 72        |
| 2     | CuBr                                     | 22        |
| 3     | Cu                                       | 19        |

|          |                                        |           |
|----------|----------------------------------------|-----------|
| 4        | Cu <sub>2</sub> O                      | 17        |
| 5        | CuSCN                                  | 8         |
| <b>6</b> | <b>CuCO<sub>3</sub></b>                | <b>73</b> |
| 7        | CuO                                    | 70        |
| 8        | Cu(acac) <sub>2</sub>                  | 45        |
| 9        | Cu(OAc) <sub>2</sub> ·H <sub>2</sub> O | 57        |
| 10       | AgOAc                                  | 8         |
| 11       | Benzoquinone                           | 16        |

**Table S4**

| Entry    | Oxidant                                                                             | Yield (%) |
|----------|-------------------------------------------------------------------------------------|-----------|
| 1        | CuF <sub>2</sub> ·xH <sub>2</sub> O (1.5 equiv.)                                    | 70        |
| 2        | CuF <sub>2</sub> ·xH <sub>2</sub> O (2.0 equiv.)                                    | 61        |
| 3        | CuCO <sub>3</sub> (1.5 equiv.)                                                      | 62        |
| 4        | CuCO <sub>3</sub> (2.0 equiv.)                                                      | 50        |
| <b>5</b> | <b>CuF<sub>2</sub>·xH<sub>2</sub>O (1.0 equiv.) + CuCO<sub>3</sub> (1.0 equiv.)</b> | <b>80</b> |
| 6        | CuF <sub>2</sub> ·xH <sub>2</sub> O (0.5 equiv.) + CuCO <sub>3</sub> (0.5 equiv.)   | 75        |
| 7        | CuF <sub>2</sub> ·xH <sub>2</sub> O (0.5 equiv.) + CuO (0.5 equiv.)                 | 66        |
| 8        | CuCO <sub>3</sub> (0.5 equiv.) + CuO (0.5 equiv.)                                   | 63        |

**Table S5:** Optimization: Amount of Solvent

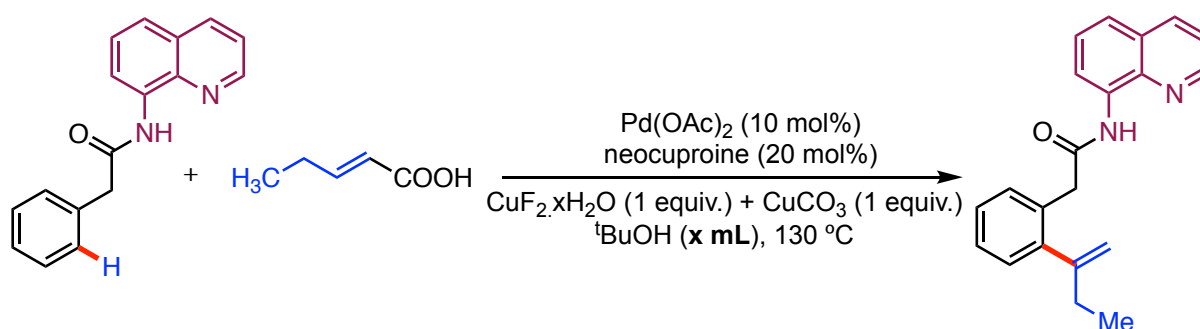

| Entry    | Solvent amount | Yield (%) |
|----------|----------------|-----------|
| 1        | 0.5            | 31        |
| 2        | 1.0            | 51        |
| 3        | 1.5            | 64        |
| <b>4</b> | <b>2.0</b>     | <b>85</b> |
| <b>5</b> | <b>2.5</b>     | <b>85</b> |
| 6        | 3.0            | 77        |

**Table S6:** Optimization: Amount of α,β-alkenyl carboxylic acids

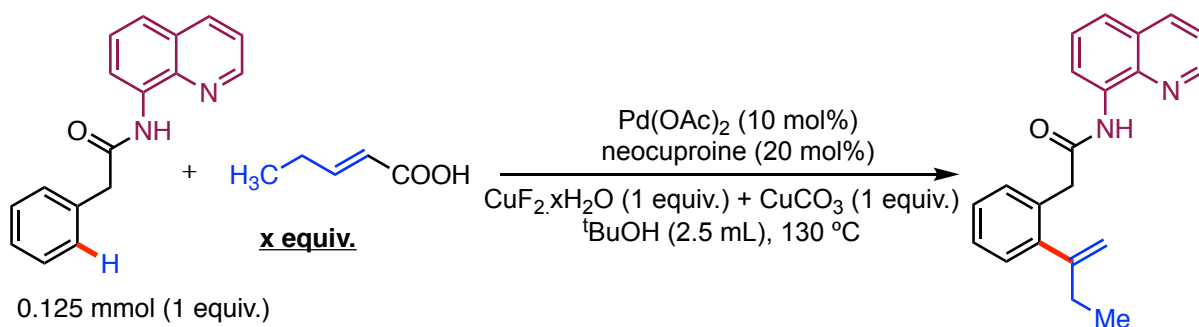

| Entry    | 2-pentenoic acid amount (equiv.) | Yield (%) |
|----------|----------------------------------|-----------|
| 1        | 1.0                              | 53        |
| 2        | 1.5                              | 60        |
| <b>3</b> | <b>2.0</b>                       | <b>85</b> |
| 4        | 2.5                              | 82        |
| 5        | 3.0                              | 81        |
| 6        | 4.0                              | 75        |

**Table S7:** Effect of bi-dentate ligand in optimized condition

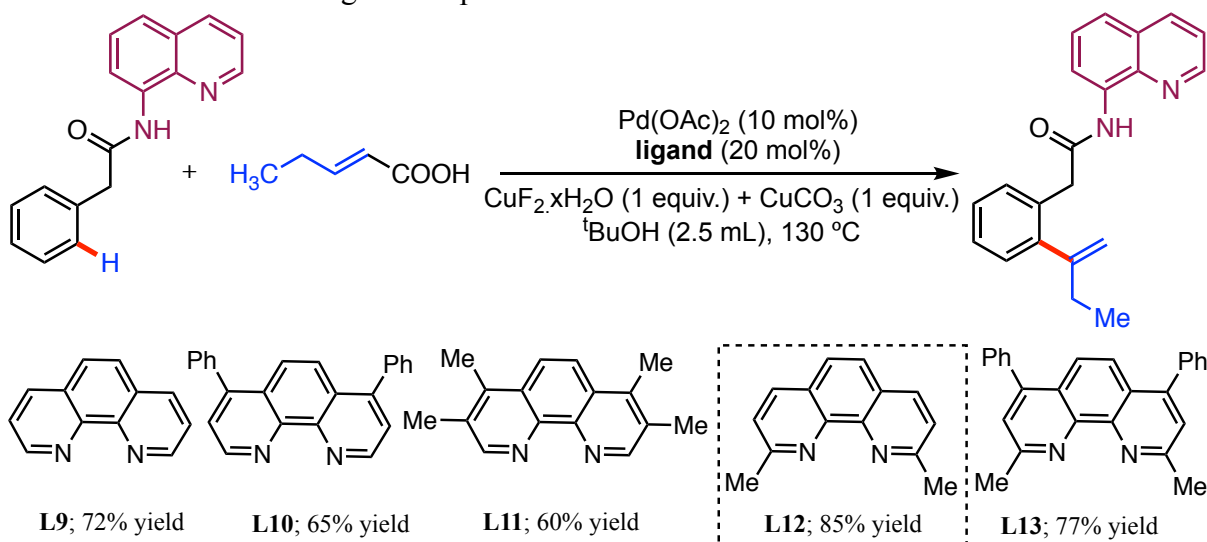

## 2.2. General procedure A: Branched selective olefination of phenyl acetic acid derivatives

In a clean, oven-dried screw cap reaction tube containing magnetic stir-bar, phenyl acetic acid derivative (0.1 mmol), Pd(OAc)<sub>2</sub> (10 mol%, 0.01 mmol), neocuproine (20 mol%, 0.02 mmol), copper (II) carbonate basic (1 equiv, 0.1 mmol), copper (II) fluoride (1 equiv, 0.1 mmol) were weighed.  $\alpha$ ,  $\beta$ -unsaturated alkenyl carboxylic acid (2 equiv, 0.2 mmol) was transferred through micro pipette. Common laboratory syringe was used to introduce *t*-BuOH (2 mL) into the reaction mixture. Then the tube was placed in a preheated oil bath at 130 °C and the reaction were stirred (at 1000 rpm) vigorously for 24 h. After detaching the reaction, it was cooled to room temperature and filtered through celite pad using ethyl acetate (30 mL). Solvent was removed in rotatory evaporator. Desired compound was extracted using EtOAc-saturated NaHCO<sub>3</sub> and combined organic layer was dried over Na<sub>2</sub>SO<sub>4</sub>. Finally, it was concentrated in reduced pressure and was purified by column chromatography through silica gel (100-200 mesh

size) using PET-ether / ethyl acetate as eluent.

## General procedure B: Sequential synthesis of bis-alkenylated products

Hetero-diolefination of branched olefinated derivatives was prepared by using literature method.<sup>1</sup> In a clean, oven-dried screw cap reaction tube containing magnetic stir-bar, branched olefinated derivative (0.1 mmol), Pd(OAc)<sub>2</sub> (10 mol%, 0.01 mmol), 2-amino phenol (20 mol%, 0.02 mmol), benzoquinone (1 equiv, 0.1 mmol) and sodium hydrogen carbonate (1 equiv, 0.1 mmol) were added. The cap was fitted with a rubber septum and the reaction tube was evacuated and back filled with oxygen three times. The corresponding olefin derivative (2 equiv, 0.2 mmol) was transferred through micro syringe and then 2 mL of DCE was added into the reaction mixture. Then the tube was placed in a preheated oil bath at 100 °C and the reaction were stirred vigorously for 24 h. After detaching the reaction, it was cooled to room temperature and filtered through celite pad using ethyl acetate (3\*10 mL). Solvent was removed in rotatory evaporator. Desired compound was extracted using ethyl acetate-saturated NaHCO<sub>3</sub> and combined organic layer was dried over Na<sub>2</sub>SO<sub>4</sub>. Finally, it was concentrated in reduced pressure and was purified by column chromatography through silica gel (100-200 mesh size) using PET-ether / ethyl acetate as eluent.

### 2.3. Characterization data

#### Representative starting materials

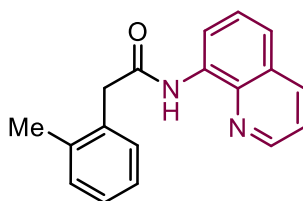

#### Starting material for entry 3i, 3j and 3s

**Rf:** 0.5 (eluent:10% EtOAc/90% hexane)

**Isolation:** Silica gel column (eluent: 5% EtOAc/95% hexane)

**Appearance:** light yellow solid

**Yield:** 98%

**<sup>1</sup>H NMR (400 MHz, CDCl<sub>3</sub>)** δ: 9.86 (s, 1H), 8.75 (dd, J = 7.3, 1.7 Hz, 1H), 8.64 (dd, J = 4.2, 1.7 Hz, 1H), 8.11 (dd, J = 8.3, 1.7 Hz, 1H), 7.54 – 7.46 (m, 2H), 7.40 – 7.35 (m, 2H), 7.28 (dd, J = 5.0, 4.0 Hz, 3H), 3.91 (s, 2H), 2.41 (s, 3H).

**$^{13}\text{C}$  NMR (101 MHz,  $\text{CDCl}_3$ )**  $\delta$ : 169.59, 148.39, 137.49, 136.37, 134.61, 133.42, 130.99, 130.81, 128.05, 127.99, 127.54, 126.83, 121.76, 121.71, 116.49, 43.52, and 19.94.

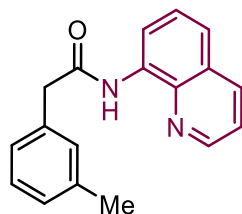

**Starting material for entry 3m**

**Rf:** 0.5 (eluent: 10% EtOAc/90% hexane)

**Isolation:** Silica gel column (eluent: 5% EtOAc/95% hexane)

**Appearance:** yellow solid

**Yield:** 82%

**$^1\text{H}$  NMR (400 MHz,  $\text{CDCl}_3$ )**  $\delta$ : 9.94 (s, 1H), 8.77 (dd,  $J$  = 7.3, 1.4 Hz, 1H), 8.70 (dd,  $J$  = 4.2, 1.6 Hz, 1H), 8.11 (dd,  $J$  = 8.3, 1.5 Hz, 1H), 7.54 – 7.44 (m, 2H), 7.40 (dd,  $J$  = 8.3, 4.2 Hz, 1H), 7.29 (dd,  $J$  = 13.5, 6.0 Hz, 2H), 7.24 (d,  $J$  = 7.6 Hz, 1H), 7.15 (d,  $J$  = 7.4 Hz, 1H), 3.86 (s, 2H), 2.39 (s, 3H).

**$^{13}\text{C}$  NMR (101 MHz,  $\text{CDCl}_3$ )**  $\delta$ : 169.82, 148.33, 138.83, 138.64, 136.40, 134.76, 134.59, 130.45, 129.04, 128.25, 128.03, 127.51, 126.71, 121.74, 121.70, 116.52, 45.50, and 21.59.

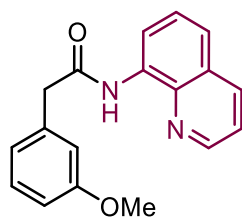

**Starting material for entry 3q and 3r**

**Rf:** 0.45 (eluent: 10% EtOAc/90% hexane)

**Isolation:** Silica gel column (eluent: 6% EtOAc/94% hexane)

**Appearance:** white solid

**Yield:** 76%

**$^1\text{H}$  NMR (400 MHz,  $\text{CDCl}_3$ )**  $\delta$ : 9.95 (s, 1H), 8.75 (dd,  $J$  = 7.2, 1.8 Hz, 1H), 8.70 (dd,  $J$  = 4.2, 1.7 Hz, 1H), 8.12 (dd,  $J$  = 8.3, 1.7 Hz, 1H), 7.54 – 7.46 (m, 2H), 7.41 (dd,  $J$  = 8.3, 4.2 Hz, 1H), 7.35 – 7.30 (m, 1H), 7.05 – 6.98 (m, 2H), 6.88 (ddd,  $J$  = 8.3, 2.6, 0.8 Hz, 1H), 3.87 (s, 2H), 3.84 (s, 3H).

**$^{13}\text{C}$  NMR (101 MHz,  $\text{CDCl}_3$ )**  $\delta$ : 148.38, 136.45, 136.34, 134.62, 131.49, 130.23, 127.56, 122.09, 121.81, 121.75, 116.58, 115.08, 113.44, 55.49, and 45.70.

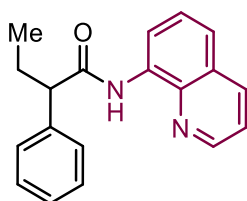

**Starting material for entry 3aa**

**Rf:** 0.5 (eluent:10% EtOAc/90% hexane)

**Isolation:** Silica gel column (eluent: 5% EtOAc/95% hexane)

**Appearance:** light brown crystalline solid

**Yield:** 96%

**<sup>1</sup>H NMR (400 MHz, CDCl<sub>3</sub>)** δ: 9.92 (s, 1H), 8.79 (dd, *J* = 7.4, 1.5 Hz, 1H), 8.74 (dd, *J* = 4.2, 1.7 Hz, 1H), 8.10 (dd, *J* = 8.3, 1.6 Hz, 1H), 7.48 (qd, *J* = 8.0, 3.9 Hz, 1H), 7.42 – 7.34 (m, 1H), 7.29 (dt, *J* = 4.1, 1.7 Hz, 1H), 3.63 (t, *J* = 7.6 Hz, 1H), 2.43 – 2.25 (m, 1H), 2.05 – 1.91 (m, 1H), 1.01 (t, *J* = 7.4 Hz, 1H).

**<sup>13</sup>C NMR (101 MHz, CDCl<sub>3</sub>)** δ: 172.33, 148.31, 140.01, 138.62, 136.43, 134.74, 129.01, 128.25, 128.05, 127.53, 127.45, 121.70, 121.60, 116.51, 56.94, 26.80, and 12.61.

Literature report<sup>1</sup>

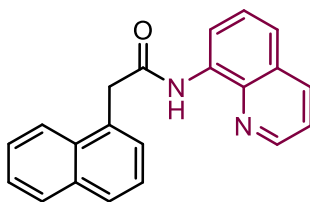

**Starting material for entry 3ab**

**Rf:** 0.5 (eluent:10% EtOAc/90% hexane)

**Isolation:** Silica gel column (eluent: 5% EtOAc/95% hexane)

**Appearance:** white solid

**Yield:** 72%

**<sup>1</sup>H NMR (400 MHz, CDCl<sub>3</sub>)** δ: 9.93 (s, 1H), 8.74 (dd, *J* = 7.5, 1.5 Hz, 1H), 8.52 (dd, *J* = 4.2, 1.7 Hz, 1H), 8.16 (dd, *J* = 12.7, 5.3 Hz, 1H), 8.05 (dd, *J* = 8.3, 1.7 Hz, 1H), 7.89 (dd, *J* = 9.1, 8.0 Hz, 2H), 7.62 (d, *J* = 6.2 Hz, 1H), 7.57 – 7.41 (m, 6H), 7.32 (dd, *J* = 8.3, 4.2 Hz, 1H), 4.35 (s, 2H).

**<sup>13</sup>C NMR (101 MHz, CDCl<sub>3</sub>)** δ: 169.63, 148.26, 138.61, 136.28, 134.54, 134.29, 132.52, 131.29, 128.96, 128.65, 128.57, 127.98, 127.47, 126.92, 126.23, 125.91, 124.18, 121.72, 121.64, 116.43, and 43.48.

Literature report<sup>1</sup>

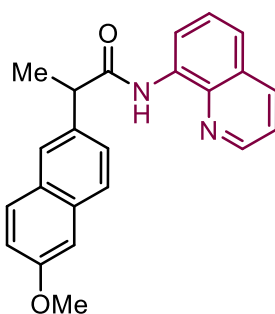

**Starting material for entry 3ad**

**Rf:** 0.45 (eluent:10% EtOAc/90% hexane)

**Isolation:** Silica gel column (eluent: 6% EtOAc/94% hexane)

**Appearance:** white solid

**Yield:** 63%

**<sup>1</sup>H NMR (400 MHz, CDCl<sub>3</sub>)** δ: 9.97 (s, 1H), 8.77 (dd, *J* = 7.5, 1.4 Hz, 1H), 8.65 – 8.60 (m, 1H), 8.22 (d, *J* = 8.8 Hz, 1H), 8.09 (dd, *J* = 8.3, 1.6 Hz, 1H), 7.89 (t, *J* = 5.7 Hz, 1H), 7.79



(d,  $J$  = 9.0 Hz, 1H), 7.69 (dd,  $J$  = 8.8, 1.8 Hz, 1H), 7.48 (ddd,  $J$  = 10.3, 8.3, 4.8 Hz, 2H), 7.37 (dd,  $J$  = 8.3, 4.3 Hz, 1H), 7.30 (d,  $J$  = 9.0 Hz, 1H), 4.10 (q,  $J$  = 7.1 Hz, 1H), 4.02 (s, 3H), 1.76 (dd,  $J$  = 6.9, 3.2 Hz, 3H).

**$^{13}\text{C}$  NMR (126 MHz,  $\text{CDCl}_3$ )**  $\delta$ : 172.72, 152.70, 148.23, 138.44, 137.33, 136.63, 134.54, 131.35, 129.88, 128.12, 128.07, 127.76, 127.58, 126.59, 124.55, 121.76, 121.70, 116.69, 114.15, 57.15, 48.54, and 18.87.

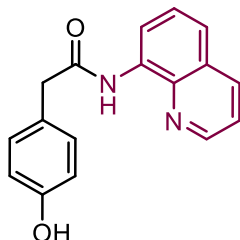

**Starting material for entry 3x**

**Rf:** 0.35 (eluent: 10% EtOAc/90% hexane)

**Isolation:** Silica gel column (eluent: 8% EtOAc/92% hexane)

**Appearance:** grey solid

**Yield:** 53%

**$^1\text{H}$  NMR (500 MHz, DMSO)**  $\delta$ : 10.15 (s, 1H), 9.36 (s, 1H), 8.89 (dd,  $J$  = 4.2, 1.6 Hz, 1H), 8.62 (d,  $J$  = 6.9 Hz, 1H), 8.41 (dd,  $J$  = 8.3, 1.6 Hz, 1H), 7.66 (dd,  $J$  = 7.0, 6.1 Hz, 1H), 7.63 (dd,  $J$  = 8.3, 4.2 Hz, 1H), 7.57 (t,  $J$  = 8.0 Hz, 1H), 7.22 (d,  $J$  = 8.4 Hz, 1H), 6.76 (t,  $J$  = 5.7 Hz, 1H), 3.81 (s, 1H).

**$^{13}\text{C}$  NMR (126 MHz, DMSO)**  $\delta$ : 170.69, 156.69, 149.34, 138.48, 137.07, 134.95, 130.85, 128.27, 127.43, 126.20, 122.60, 122.32, 116.77, 115.78, 60.25, and 43.41.

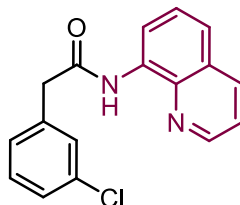

**Starting material for entry 3p and 3y**

**Rf:** 0.5 (eluent: 10% EtOAc/90% hexane)

**Isolation:** Silica gel column (eluent: 5% EtOAc/95% hexane)

**Appearance:** white solid

**Yield:** 60%

**$^1\text{H}$  NMR (500 MHz,  $\text{CDCl}_3$ )**  $\delta$ : 9.93 (s, 1H), 8.75 – 8.72 (m, 2H), 8.14 (dd,  $J$  = 8.3, 1.7 Hz, 1H), 7.54 – 7.49 (m, 2H), 7.46 – 7.42 (m, 2H), 7.34 – 7.30 (m, 3H), 3.87 (s, 2H).

**$^{13}\text{C}$  NMR (126 MHz,  $\text{CDCl}_3$ )**  $\delta$ : 168.79, 148.48, 138.67, 136.83, 136.52, 134.44, 130.34, 129.89, 128.11, 127.93, 127.76, 127.56, 122.00, 121.84, 116.68, and 44.99.

Literature report<sup>1</sup>

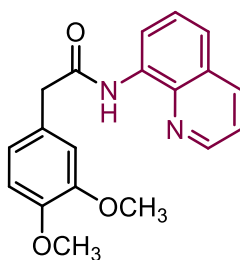

**Starting material for entry 3ag and 3ah**

**Rf:** 0.4 (eluent: 10% EtOAc/90% hexane)

**Isolation:** Silica gel column (eluent: 6% EtOAc/94% hexane)

**Appearance:** white solid

**Yield:** 75%

**<sup>1</sup>H NMR (500 MHz, CDCl<sub>3</sub>)** δ: 9.95 (s, 1H), 8.75 (dd, *J* = 7.4, 1.5 Hz, 1H), 8.69 (dd, *J* = 4.2, 1.7 Hz, 1H), 8.12 (dd, *J* = 8.3, 1.6 Hz, 1H), 7.53 – 7.46 (m, 2H), 7.40 (dd, *J* = 8.3, 4.2 Hz, 1H), 6.97 (dd, *J* = 6.0, 2.0 Hz, 2H), 6.93 – 6.88 (m, 1H), 3.92 (s, 3H), 3.89 (s, 3H), 3.83 (s, 2H).

**<sup>13</sup>C NMR (126 MHz, CDCl<sub>3</sub>)** δ: 170.00, 149.60, 148.65, 148.35, 138.69, 136.50, 134.58, 128.10, 127.55, 127.38, 122.01, 121.83, 121.73, 116.65, 112.87, 111.89, 56.19, 56.13, and 45.18.

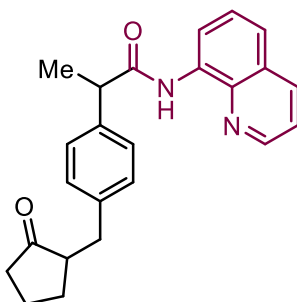

**Starting material for entry 3ae**

**Rf:** 0.6 (eluent: 10% EtOAc/hexane)

**Isolation:** Silica gel column (eluent: 5% EtOAc/hexane)

**Appearance:** solid

**Yield:** 89%

**<sup>1</sup>H NMR (500 MHz, CDCl<sub>3</sub>)** δ 9.86 (s, 1H), 8.74 (d, *J* = 7.5 Hz, 1H), 8.62 (d, *J* = 3.1 Hz, 1H), 8.01 (t, *J* = 13.3 Hz, 1H), 7.42 (t, *J* = 7.9 Hz, 1H), 7.37 (d, *J* = 7.6 Hz, 2H), 7.30 (dd, *J* = 8.0, 4.1 Hz, 1H), 7.14 (d, *J* = 7.8 Hz, 2H), 3.88 (q, *J* = 6.9 Hz, 1H), 3.09 (dt, *J* = 11.0, 5.5 Hz, 1H), 2.48 (dd, *J* = 13.7, 9.7 Hz, 1H), 2.26 (dd, *J* = 18.9, 8.0 Hz, 2H), 2.07 – 1.97 (m, 2H), 1.64 (d, *J* = 7.1 Hz, 4H), 1.48 (ddd, *J* = 16.2, 11.5, 5.1 Hz, 1H).

**<sup>13</sup>C NMR (126 MHz, CDCl<sub>3</sub>)** δ 177.28, 172.79, 148.02, 138.87, 138.29, 136.17, 134.38, 129.37, 127.75, 127.69, 127.18, 121.46, 116.21, 77.49, 77.23, 76.97, 50.90, 50.88, 48.10, 44.87, 38.08, 35.09, 29.05, 29.03, 20.44, 18.57.

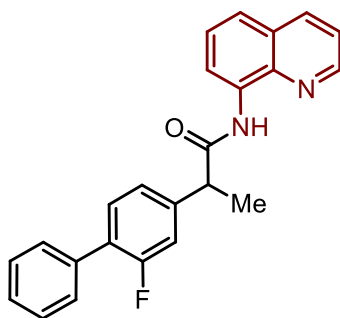

### Starting material for entry 3af

**Rf:** 0.55 (eluent: 10% EtOAc/hexane)

**Isolation:** Silica gel column (eluent: 8% EtOAc/hexane)

**Appearance:** solid

**Yield:** 86%

**$^1\text{H}$  NMR (500 MHz,  $\text{CDCl}_3$ )**  $\delta$  10.01 (s, 1H), 8.79 (t,  $J$  = 10.4 Hz, 1H), 8.77 – 8.70 (m, 1H), 8.11 (d,  $J$  = 7.1 Hz, 1H), 7.58 – 7.50 (m, 3H), 7.50 – 7.31 (m, 8H), 3.98 (q,  $J$  = 6.8 Hz, 1H), 1.74 (d,  $J$  = 6.6 Hz, 3H).

**$^{13}\text{C}$  NMR (126 MHz,  $\text{CDCl}_3$ )**  $\delta$  172.05 (s), 159.9 (d,  $^1J_{\text{FC}}$  = 249.4 Hz), 142.6, 138.5, 136.4, 135.6, 134.4, 131.2 (d,  $^4J_{\text{FC}}$  = 3.78 Hz), 129.0, 128.5, 128.1 (d,  $^3J_{\text{FC}}$  = 13.8 Hz), 127.7, 127.4, 123.8, 121.72 (d,  $J$  = 7.2 Hz), 116.4, 115.4 (d,  $^2J_{\text{FC}}$  = 23.9 Hz), 48.2, 18.7.

### Olefinated product

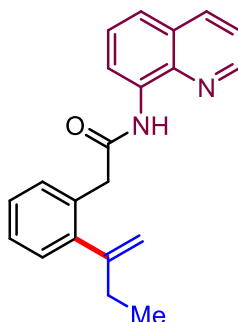

### (Scheme 2, entry 3a)

**Rf:** 0.55 (eluent: 10% EtOAc/90% hexane)

**Isolation:** Silica gel column (eluent: 5% EtOAc/95% hexane)

**Appearance:** colorless liquid

**Yield:** 76%

**$^1\text{H}$  NMR (400 MHz,  $\text{CDCl}_3$ )**  $\delta$ : 9.84 (s, 1H), 8.75 (dd,  $J$  = 7.4, 1.2 Hz, 1H), 8.65 (dd,  $J$  = 4.2, 1.6 Hz, 1H), 8.10 (dd,  $J$  = 8.3, 1.6 Hz, 1H), 7.53 – 7.45 (m, 3H), 7.38 (dd,  $J$  = 8.3, 4.2 Hz, 1H), 7.34 – 7.30 (m, 2H), 7.22 – 7.19 (m, 1H), 5.26 (d,  $J$  = 1.6 Hz, 1H), 5.01 (s, 1H), 3.91 (s, 2H), 2.38 (q,  $J$  = 7.4 Hz, 2H), 1.06 (t,  $J$  = 7.4 Hz, 3H).

**$^{13}\text{C}$  NMR (126 MHz,  $\text{CDCl}_3$ )**  $\delta$ : 170.23, 150.74, 148.25, 144.25, 138.67, 136.33, 134.68, 131.81, 130.74, 129.18, 128.04, 127.62, 127.53, 127.35, 121.67, 121.65, 116.45, 114.07, 42.82, 31.46, and 12.45.

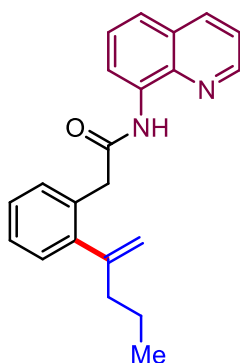

**(Scheme 2, entry 3b)**

**Rf:** 0.55 (eluent:10% EtOAc/90% hexane)

**Isolation:** Silica gel column (eluent: 5% EtOAc/95% hexane)

**Appearance:** colorless liquid

**Yield:** 83%

**<sup>1</sup>H NMR (500 MHz, CDCl<sub>3</sub>)** δ: 9.85 (s, 1H), 8.75 (dd, *J* = 7.5, 1.0 Hz, 1H), 8.66 (dd, *J* = 4.1, 1.4 Hz, 1H), 8.12 (d, *J* = 7.6 Hz, 1H), 7.51 (t, *J* = 7.8 Hz, 1H), 7.49 – 7.44 (m, 2H), 7.40 (dd, *J* = 8.2, 4.2 Hz, 1H), 7.34 – 7.28 (m, 2H), 7.21 – 7.18 (m, 1H), 5.25 (d, *J* = 1.4 Hz, 1H), 5.01 (s, 1H), 3.92 (s, 2H), 2.33 (t, *J* = 7.7 Hz, 2H), 1.45 (dq, *J* = 14.8, 7.4 Hz, 2H), 0.86 (t, *J* = 7.3 Hz, 3H).

**<sup>13</sup>C NMR (126 MHz, CDCl<sub>3</sub>)** δ: 170.31, 149.25, 148.16, 144.17, 136.53, 134.64, 131.82, 130.78, 129.25, 128.33, 128.10, 127.62, 127.34, 121.70, 121.66, 116.67, 115.22, 42.84, 40.78, 21.06, and 14.01.

**HRMS (ESI):** [M-H]<sup>+</sup> calculated for C<sub>22</sub>H<sub>23</sub>N<sub>2</sub>O: 331.1805, found: 331.1806.

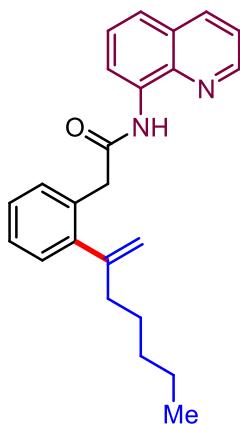

**(Scheme 2, entry 3d)**

**Rf:** 0.55 (eluent:10% EtOAc/90% hexane)

**Isolation:** Silica gel column (eluent: 5% EtOAc/95% hexane)

**Appearance:** colorless liquid

**Yield:** 78%

**<sup>1</sup>H NMR (500 MHz, CDCl<sub>3</sub>)** δ: 9.83 (s, 1H), 8.74 (d, *J* = 7.5 Hz, 1H), 8.66 – 8.62 (m, 1H), 8.10 (d, *J* = 8.3 Hz, 1H), 7.50 (t, *J* = 7.8 Hz, 1H), 7.46 (d, *J* = 8.3 Hz, 2H), 7.38 (dd, *J* = 7.8, 3.8 Hz, 1H), 7.35 – 7.28 (m, 2H), 7.20 (d, *J* = 7.1 Hz, 1H), 5.24 (s, 1H), 5.00 (s, 1H),

3.91 (s, 2H), 2.35 – 2.31 (m, 2H), 1.45 – 1.35 (m, 2H), 1.16 (dd,  $J = 14.1, 6.6$  Hz, 4H), 0.77 (t,  $J = 6.6$  Hz, 3H).

**$^{13}\text{C}$  NMR (126 MHz,  $\text{CDCl}_3$ )**  $\delta$ : 170.27, 149.51, 148.26, 144.23, 138.68, 136.36, 134.68, 131.79, 130.83, 129.26, 128.06, 127.63, 127.56, 127.38, 121.67, 116.48, 115.03, 42.90, 38.64, 31.78, 27.59, 22.63, and 14.17.

**HRMS (ESI):**  $[\text{M}-\text{H}]^+$  calculated for  $\text{C}_{24}\text{H}_{27}\text{N}_2\text{O}$ : 359.2118, found: 359.2115.

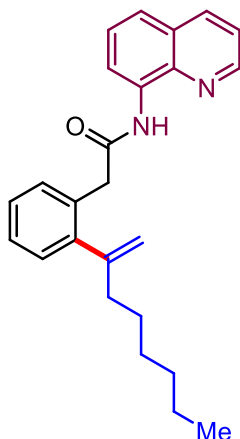

**(Scheme 2, entry 3e)**

**Rf:** 0.6 (eluent: 10% EtOAc/90% hexane)

**Isolation:** Silica gel column (eluent: 4% EtOAc/96% hexane)

**Appearance:** colorless liquid

**Yield:** 81%

**$^1\text{H}$  NMR (500 MHz,  $\text{CDCl}_3$ )**  $\delta$ : 9.85 (s, 1H), 8.75 (dd,  $J = 7.5, 1.4$  Hz, 1H), 8.65 (dd,  $J = 4.2, 1.6$  Hz, 1H), 8.12 (dd,  $J = 8.3, 1.4$  Hz, 1H), 7.53 – 7.49 (m, 1H), 7.46 (ddd,  $J = 4.6, 4.2, 1.5$  Hz, 2H), 7.39 (dd,  $J = 8.3, 4.2$  Hz, 1H), 7.35 – 7.29 (m, 2H), 7.21 – 7.18 (m, 1H), 5.24 (d,  $J = 1.6$  Hz, 1H), 5.00 – 4.98 (m, 1H), 3.92 (s, 2H), 2.36 – 2.30 (m, 2H), 1.38 (dt,  $J = 15.4, 7.6$  Hz, 2H), 1.24 – 1.07 (m, 6H), 0.77 (t,  $J = 7.1$  Hz, 3H).

**$^{13}\text{C}$  NMR (126 MHz,  $\text{CDCl}_3$ )**  $\delta$ : 170.32, 149.52, 148.16, 144.22, 138.52, 134.60, 131.77, 130.85, 129.25, 128.33, 128.09, 127.87, 127.62, 127.38, 121.71, 121.66, 116.67, 115.01, 42.86, 38.70, 31.83, 29.29, 27.90, 22.76, and 14.22.

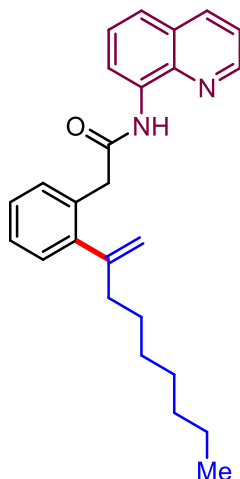

**(Scheme 2, entry 3f)**

**Rf:** 0.6 (eluent:10% EtOAc/90% hexane)

**Isolation:** Silica gel column (eluent: 4% EtOAc/96% hexane)

**Appearance:** colorless liquid

**Yield:** 82%

**<sup>1</sup>H NMR (500 MHz, CDCl<sub>3</sub>)** δ: 9.85 (s, 1H), 8.75 (dd, *J* = 7.5, 1.4 Hz, 1H), 8.65 (dd, *J* = 4.2, 1.6 Hz, 1H), 8.12 (dd, *J* = 8.3, 1.4 Hz, 1H), 7.53 – 7.49 (m, 1H), 7.46 (ddd, *J* = 4.6, 4.2, 1.5 Hz, 2H), 7.39 (dd, *J* = 8.3, 4.2 Hz, 1H), 7.35 – 7.29 (m, 2H), 7.21 – 7.18 (m, 1H), 5.24 (d, *J* = 1.6 Hz, 1H), 5.00 – 4.98 (m, 1H), 3.92 (s, 2H), 2.36 – 2.30 (m, 2H), 1.38 (dt, *J* = 15.4, 7.6 Hz, 2H), 1.24 – 1.05 (m, 8H), 0.77 (t, *J* = 7.1 Hz, 3H).

**<sup>13</sup>C NMR (126 MHz, CDCl<sub>3</sub>)** δ: 170.32, 149.52, 148.16, 144.22, 138.52, 134.60, 131.77, 130.85, 129.25, 128.33, 128.09, 127.87, 127.62, 127.38, 121.71, 121.66, 116.67, 115.01, 42.86, 38.70, 31.83, 29.29, 27.90, 22.76, and 14.22.

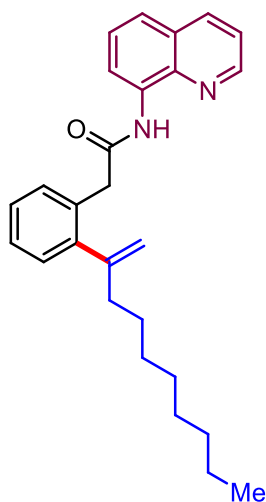

**(Scheme 2, entry 3g)**

**Rf:** 0.6 (eluent:10% EtOAc/90% hexane)

**Isolation:** Silica gel column (eluent: 4% EtOAc/96% hexane)

**Appearance:** colorless liquid

**Yield:** 80%

**<sup>1</sup>H NMR (500 MHz, CDCl<sub>3</sub>)** δ: 9.83 (s, 1H), 8.75 (dd, *J* = 7.5, 1.4 Hz, 1H), 8.64 (dd, *J* = 4.2, 1.7 Hz, 1H), 8.10 (dd, *J* = 8.3, 1.6 Hz, 1H), 7.48 (ddd, *J* = 11.0, 8.6, 4.9 Hz, 4H), 7.38 (dd, *J* = 8.3, 4.2 Hz, 1H), 7.33 – 7.30 (m, 2H), 7.21 – 7.18 (m, 1H), 5.24 (dd, *J* = 3.1, 1.4 Hz, 1H), 5.01 – 4.99 (m, 1H), 3.92 (s, 2H), 2.35 – 2.31 (m, 2H), 1.42 – 1.35 (m, 2H), 1.20 (dt, *J* = 14.6, 6.9 Hz, 4H), 1.15 – 1.08 (m, 6H), 0.84 (dd, *J* = 9.3, 5.1 Hz, 3H).

**<sup>13</sup>C NMR (126 MHz, CDCl<sub>3</sub>)** δ: 170.27, 149.52, 148.25, 144.21, 138.65, 136.36, 134.65, 131.76, 130.85, 129.26, 128.04, 127.62, 127.55, 127.38, 121.67, 116.47, 115.01, 42.88, 38.70, 32.01, 29.63, 29.57, 29.42, 27.95, 22.81, and 14.29.

**HRMS (ESI):** [M-H]<sup>+</sup> calculated for C<sub>27</sub>H<sub>33</sub>N<sub>2</sub>O: 401.2587, found: 401.2586.

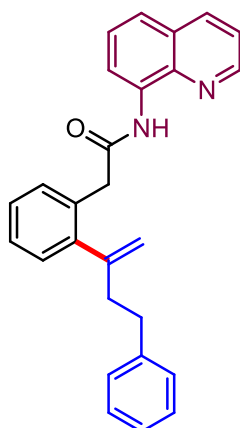

**(Scheme 2, entry 3h)**

**Rf:** 0.5 (eluent: 10% EtOAc/90% hexane)

**Isolation:** Silica gel column (eluent: 5% EtOAc/95% hexane)

**Appearance:** white solid

**Yield:** 65%

**<sup>1</sup>H NMR (500 MHz, CDCl<sub>3</sub>)** δ: 9.85 (s, 1H), 8.75 (dd, *J* = 7.4, 1.5 Hz, 1H), 8.62 (dd, *J* = 4.2, 1.7 Hz, 1H), 8.11 (dd, *J* = 8.3, 1.5 Hz, 1H), 7.53 – 7.45 (m, 3H), 7.39 – 7.36 (m, 1H), 7.35 – 7.30 (m, 2H), 7.24 – 7.21 (m, 1H), 7.20 – 7.15 (m, 2H), 7.14 – 7.09 (m, 1H), 7.06 – 7.03 (m, 2H), 5.34 – 5.31 (m, 1H), 5.07 – 5.05 (m, 1H), 3.91 (s, 2H), 2.77 – 2.71 (m, 2H), 2.68 (ddd, *J* = 8.1, 6.0, 5.1 Hz, 2H).

**<sup>13</sup>C NMR (126 MHz, CDCl<sub>3</sub>)** δ: 170.23, 148.57, 148.19, 143.70, 141.83, 134.56, 131.91, 130.98, 129.23, 128.46, 128.44, 128.11, 127.80, 127.65, 127.47, 125.98, 121.75, 121.69, 115.73, 42.86, 40.12, and 34.24.

**HRMS (ESI):** [M-H]<sup>+</sup> calculated for C<sub>27</sub>H<sub>25</sub>N<sub>2</sub>O: 393.1961, found: 393.1959.

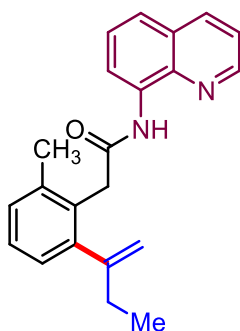

**(Scheme 2, entry 3i)**

**Rf:** 0.5 (eluent: 10% EtOAc/90% hexane)

**Isolation:** Silica gel column (eluent: 5% EtOAc/95% hexane)

**Appearance:** liquid

**Yield:** 71%

**<sup>1</sup>H NMR (400 MHz, CDCl<sub>3</sub>)** δ: 9.78 (s, 1H), 8.73 (dt, *J* = 8.1, 4.0 Hz, 1H), 8.60 (dd, *J* = 4.2, 1.6 Hz, 1H), 8.10 (dd, *J* = 8.3, 1.6 Hz, 1H), 7.51 (dd, *J* = 10.3, 5.4 Hz, 1H), 7.46 (dd, *J* = 8.2, 1.5 Hz, 1H), 7.37 (dd, *J* = 8.3, 4.2 Hz, 1H), 7.24 (d, *J* = 7.5 Hz, 1H), 7.19 (d, *J* =

7.2 Hz, 1H), 7.09 (d,  $J = 7.4$  Hz, 1H), 5.20 (d,  $J = 1.7$  Hz, 1H), 5.05 – 5.02 (m, 1H), 3.94 (s, 2H), 2.40 – 2.32 (m, 5H), 1.05 (t,  $J = 7.4$  Hz, 3H).

**$^{13}\text{C}$  NMR (126 MHz,  $\text{CDCl}_3$ )**  $\delta$ : 170.05, 151.50, 148.28, 145.13, 138.76, 138.31, 136.28, 134.71, 130.35, 129.59, 128.06, 127.54, 127.34, 127.07, 121.66, 121.62, 116.48, 113.79, 40.27, 31.70, 20.53, and 12.49.

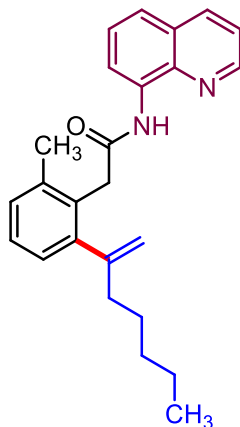

**(Scheme 2, entry 3j)**

**Rf:** 0.55 (eluent: 10% EtOAc/90% hexane)

**Isolation:** Silica gel column (eluent: 4% EtOAc/96% hexane)

**Appearance:** liquid

**Yield:** 74%

**$^1\text{H}$  NMR (500 MHz,  $\text{CDCl}_3$ )**  $\delta$ : 9.78 (s, 1H), 8.74 (dd,  $J = 7.5, 1.4$  Hz, 1H), 8.59 (dd,  $J = 4.2, 1.7$  Hz, 1H), 8.09 (dd,  $J = 8.3, 1.6$  Hz, 1H), 7.53 – 7.48 (m, 1H), 7.47 – 7.44 (m, 1H), 7.36 (dd,  $J = 8.3, 4.2$  Hz, 1H), 7.23 (d,  $J = 7.5$  Hz, 1H), 7.19 (d,  $J = 6.9$  Hz, 1H), 7.10 – 7.06 (m, 1H), 5.19 (dd,  $J = 3.1, 1.4$  Hz, 1H), 5.05 – 5.02 (m, 1H), 3.95 (s, 2H), 2.39 (s, 3H), 2.34 – 2.28 (m, 2H), 1.44 – 1.37 (m, 2H), 1.24 – 1.12 (m, 4H), 0.79 – 0.74 (m, 3H).

**$^{13}\text{C}$  NMR (126 MHz,  $\text{CDCl}_3$ )**  $\delta$ : 170.05, 150.22, 148.25, 145.05, 138.73, 138.31, 136.27, 134.67, 130.31, 129.58, 128.04, 127.53, 127.33, 127.13, 121.63, 121.61, 116.46, 114.75, 40.27, 38.88, 31.78, 27.60, 22.63, 20.52, and 14.15.

**HRMS (ESI):**  $[\text{M}-\text{H}]^+$  calculated for  $\text{C}_{25}\text{H}_{29}\text{N}_2\text{O}$ : 373.2274, found: 373.2273.

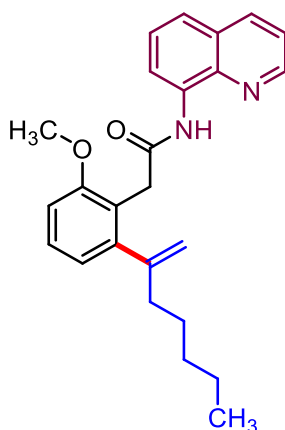



**(Scheme 2, entry 3k)**

**Rf:** 0.5 (eluent:10% EtOAc/90% hexane)

**Isolation:** Silica gel column (eluent: 5% EtOAc/95% hexane)

**Appearance:** liquid

**Yield:** 70%

**<sup>1</sup>H NMR (400 MHz, CDCl<sub>3</sub>)** δ: 10.18 (s, 1H), 8.76 (dd, *J* = 7.6, 1.5 Hz, 1H), 8.68 (dd, *J* = 4.2, 1.7 Hz, 1H), 8.10 (dd, *J* = 8.3, 1.7 Hz, 1H), 7.47 (ddd, *J* = 12.0, 9.7, 4.8 Hz, 2H), 7.38 (dd, *J* = 8.3, 4.2 Hz, 1H), 7.28 (d, *J* = 8.0 Hz, 1H), 6.92 – 6.86 (m, 1H), 6.83 (dd, *J* = 7.7, 1.1 Hz, 1H), 5.24 (dd, *J* = 3.3, 1.5 Hz, 1H), 5.02 – 4.95 (m, 1H), 3.93 (s, 3H), 3.92 (s, 2H), 2.39 – 2.33 (m, 2H), 1.45 – 1.35 (m, 2H), 1.25 – 1.18 (m, 4H), 0.79 (t, *J* = 7.1 Hz, 3H).

**<sup>13</sup>C NMR (101 MHz, CDCl<sub>3</sub>)** δ: 170.53, 157.85, 149.17, 148.07, 146.02, 138.83, 136.32, 135.25, 128.09, 128.02, 127.64, 121.54, 121.51, 121.23, 121.03, 116.57, 114.99, 109.06, 55.91, 38.73, 37.50, 31.81, 27.58, 22.69, and 14.22.

**HRMS (ESI):** [M-H]<sup>+</sup> calculated for C<sub>25</sub>H<sub>29</sub>N<sub>2</sub>O<sub>2</sub>: 389.2224, found: 389.2223.

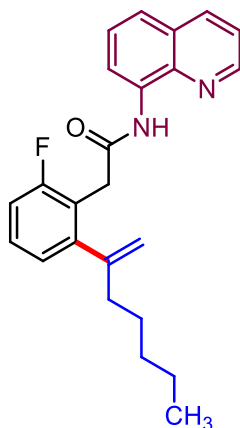

**(Scheme 2, entry 3l)**

**Rf:** 0.5 (eluent:10% EtOAc/90% hexane)

**Isolation:** Silica gel column (eluent: 5% EtOAc/95% hexane)

**Appearance:** liquid

**Yield:** 53%

**<sup>1</sup>H NMR (500 MHz, CDCl<sub>3</sub>)** δ: 9.85 (s, 1H), 8.75 – 8.67 (m, 2H), 8.13 (dd, *J* = 8.3, 1.6 Hz, 1H), 7.54 – 7.46 (m, 2H), 7.41 (dd, *J* = 8.3, 4.2 Hz, 1H), 7.17 (ddd, *J* = 14.4, 9.0, 4.3 Hz, 2H), 6.99 (td, *J* = 8.4, 2.7 Hz, 1H), 5.26 (d, *J* = 1.5 Hz, 1H), 5.00 – 4.98 (m, 1H), 3.88 (s, 2H), 2.33 – 2.27 (m, 2H), 1.40 – 1.35 (m, 2H), 1.23 – 1.14 (m, 4H), 0.78 (t, *J* = 7.1 Hz, 3H).

**<sup>13</sup>C NMR (101 MHz, CDCl<sub>3</sub>)** δ: 169.08, 161.91 (d, *J* = 247.4 Hz), 148.31, 146.62, 146.58, 138.66, 136.42, 134.81, 134.58, 132.99, 128.73, 128.64, 128.07, 127.59, 124.66, 124.63, 121.72, 121.22, 119.88, 119.73, 116.70, 116.61, 115.61, 114.21, 113.98, 38.52, 36.02, 31.73, 27.55, 22.63, and 14.17.

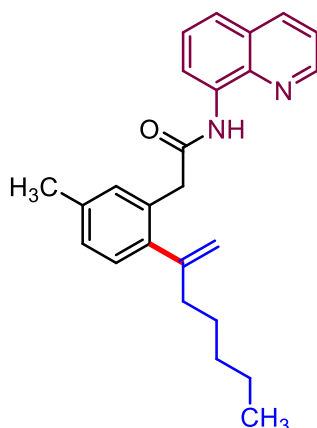

**(Scheme 2, entry 3m)**

**Rf:** 0.55 (eluent: 10% EtOAc/90% hexane)

**Isolation:** Silica gel column (eluent: 4% EtOAc/96% hexane)

**Appearance:** liquid

**Yield:** 68%

**<sup>1</sup>H NMR (500 MHz, CDCl<sub>3</sub>)** δ: 9.86 (s, 1H), 8.75 (dd, *J* = 7.5, 1.4 Hz, 1H), 8.68 – 8.64 (m, 1H), 8.11 (dd, *J* = 8.3, 1.6 Hz, 1H), 7.53 – 7.45 (m, 2H), 7.39 (dd, *J* = 8.3, 4.2 Hz, 1H), 7.29 (s, 1H), 7.13 – 7.07 (m, 2H), 5.23 (t, *J* = 4.6 Hz, 1H), 5.01 – 4.97 (m, 1H), 3.88 (s, 2H), 2.38 (s, 3H), 2.34 – 2.29 (m, 2H), 1.42 – 1.35 (m, 2H), 1.23 – 1.14 (m, 4H), 0.77 (t, *J* = 7.1 Hz, 3H).

**<sup>13</sup>C NMR (126 MHz, CDCl<sub>3</sub>)** δ: 170.38, 149.45, 148.24, 141.25, 138.73, 137.22, 136.34, 134.73, 131.61, 131.41, 129.13, 128.11, 128.06, 127.55, 121.66, 121.63, 116.49, 114.95, 42.84, 38.75, 31.79, 27.62, 22.63, 21.28, 14.17.

**HRMS (ESI):** [M-H]<sup>+</sup> calculated for C<sub>25</sub>H<sub>28</sub>N<sub>2</sub>NaO: 395.2094, found: 395.2089.

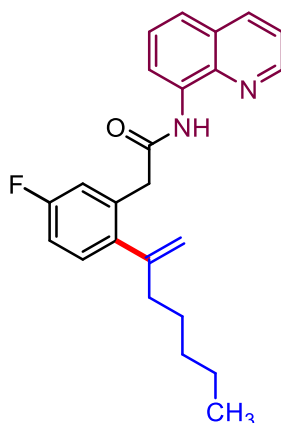

**(Scheme 2, entry 3n)**

**Rf:** 0.5 (eluent: 10% EtOAc/90% hexane)

**Isolation:** Silica gel column (eluent: 5% EtOAc/95% hexane)

**Appearance:** liquid

**Yield:** 49%

**<sup>1</sup>H NMR (500 MHz, CDCl<sub>3</sub>)** δ: 9.87 (s, 1H), 8.73 (dt, *J* = 8.7, 4.3 Hz, 1H), 8.69 (dd, *J* = 4.2, 1.5 Hz, 1H), 8.16 – 8.11 (m, 1H), 7.54 – 7.47 (m, 2H), 7.41 (dd, *J* = 8.3, 4.2 Hz, 1H), 7.18 (dd, *J* = 9.6, 2.6 Hz, 1H), 7.15 (dd, *J* = 8.5, 5.9 Hz, 1H), 7.00 (td, *J* = 8.4, 2.7 Hz, 1H), 5.26 (d, *J* = 1.5 Hz, 1H), 4.99 (s, 1H), 3.89 (s, 2H), 2.33 – 2.28 (m, 2H), 1.38 (dd, *J* = 14.2, 6.4 Hz, 2H), 1.23 – 1.14 (m, 4H), 0.78 (t, *J* = 7.0 Hz, 3H).

**<sup>13</sup>C NMR (126 MHz, CDCl<sub>3</sub>)** δ: 169.47, 161.95 (d, *J* = 245.7 Hz), 148.63, 148.30, 140.05, 140.03, 138.57, 136.52, 135.58, 134.48, 134.02, 133.96, 132.59, 130.71, 130.64, 128.09, 127.58, 121.86, 121.76, 117.40, 117.23, 116.63, 115.66, 114.39, 114.22, 42.72, 38.71, 31.75, 27.53, 22.64, and 14.17.

**HRMS (ESI):** [M-H]<sup>+</sup> calculated for C<sub>24</sub>H<sub>26</sub>N<sub>2</sub>O: 377.2024, found: 377.2022.

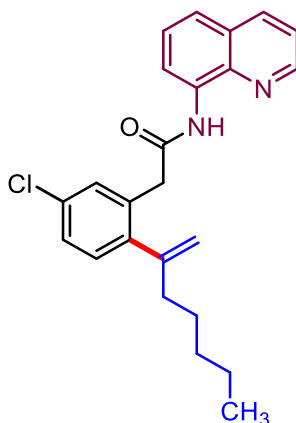

**(Scheme 2, entry 3o)**

**Rf:** 0.5 (eluent: 10% EtOAc/90% hexane)

**Isolation:** Silica gel column (eluent: 5% EtOAc/95% hexane)

**Appearance:** liquid

**Yield:** 57%

**<sup>1</sup>H NMR (500 MHz, CDCl<sub>3</sub>)** δ: 9.87 (s, 1H), 8.74 – 8.65 (m, 2H), 8.13 (d, *J* = 8.3 Hz, 1H), 7.54 – 7.46 (m, 3H), 7.42 (ddd, *J* = 8.2, 4.1, 1.8 Hz, 1H), 7.27 (d, *J* = 9.4 Hz, 1H), 7.12 (dd, *J* = 8.2, 1.5 Hz, 1H), 5.26 (s, 1H), 5.00 (s, 1H), 3.87 (d, *J* = 1.2 Hz, 2H), 2.31 (t, *J* = 7.6 Hz, 2H), 1.37 (dd, *J* = 14.1, 7.3 Hz, 2H), 1.20 (dd, *J* = 9.2, 6.3 Hz, 4H), 0.78 (dd, *J* = 7.0, 5.5 Hz, 3H).

**<sup>13</sup>C NMR (126 MHz, CDCl<sub>3</sub>)** δ: 169.34, 148.44, 148.38, 142.55, 138.63, 136.43, 134.47, 133.77, 133.14, 130.67, 130.46, 128.06, 127.54, 127.50, 121.85, 121.78, 116.53, 115.68, 42.51, 38.53, 31.73, 27.51, 22.62, 14.17.

**HRMS (ESI):** [M-H]<sup>+</sup> calculated for C<sub>24</sub>H<sub>26</sub>ClN<sub>2</sub>O: 393.1728, found: 393.1727.

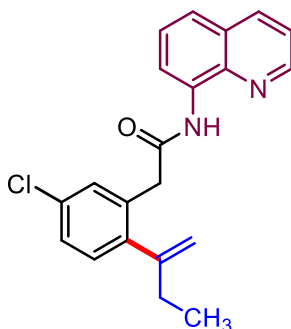

**(Scheme 2, entry 3p)**

**Rf:** 0.5 (eluent:10% EtOAc/90% hexane)

**Isolation:** Silica gel column (eluent: 5% EtOAc/95% hexane)

**Appearance:** liquid

**Yield:** 60%

**<sup>1</sup>H NMR (500 MHz, CDCl<sub>3</sub>)** δ: 9.86 (s, 1H), 8.71 (tt, *J* = 7.3, 3.8 Hz, 2H), 8.15 – 8.11 (m, 1H), 7.50 (ddd, *J* = 13.5, 9.0, 2.4 Hz, 3H), 7.42 (dd, *J* = 8.3, 4.2 Hz, 1H), 7.27 (dd, *J* = 7.6, 1.6 Hz, 2H), 7.14 – 7.11 (m, 1H), 5.29 – 5.25 (m, 1H), 5.00 (d, *J* = 1.4 Hz, 1H), 3.86 (s, 2H), 2.38 – 2.30 (m, 2H), 1.05 (t, *J* = 7.4 Hz, 3H).

**<sup>13</sup>C NMR (126 MHz, CDCl<sub>3</sub>)** δ: 169.34, 149.71, 148.39, 142.61, 138.64, 136.47, 133.81, 133.17, 130.61, 130.41, 128.33, 128.08, 127.56, 127.51, 121.86, 121.80, 116.57, 114.74, 42.46, 31.40, and 12.40.

**HRMS (ESI):** [M-H]<sup>+</sup> calculated for C<sub>21</sub>H<sub>20</sub>ClN<sub>2</sub>O: 351.1259, found: 351.1256.

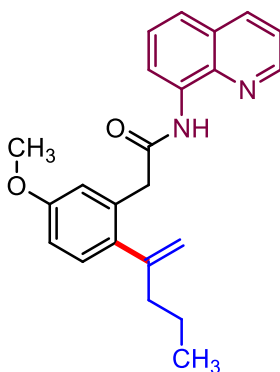

**(Scheme 2, entry 3q)**

**Rf:** 0.5 (eluent:10% EtOAc/90% hexane)

**Isolation:** Silica gel column (eluent: 5% EtOAc/95% hexane)

**Appearance:** liquid

**Yield:** 65%

**<sup>1</sup>H NMR (400 MHz, CDCl<sub>3</sub>)** δ: 9.87 (s, 1H), 8.74 (dt, *J* = 7.1, 3.5 Hz, 1H), 8.66 (dd, *J* = 4.2, 1.7 Hz, 1H), 8.11 (dd, *J* = 8.3, 1.7 Hz, 1H), 7.53 – 7.45 (m, 2H), 7.39 (dd, *J* = 8.3, 4.2 Hz, 1H), 7.12 (d, *J* = 8.5 Hz, 1H), 7.01 (d, *J* = 2.7 Hz, 1H), 6.86 (dd, *J* = 8.5, 2.7 Hz, 1H), 5.24 (dd, *J* = 3.3, 1.5 Hz, 1H), 5.02 – 4.95 (m, 1H), 3.89 (s, 2H), 3.83 (s, 3H), 2.31 (t, *J* = 7.6 Hz, 2H), 1.42 (dt, *J* = 6.5, 4.9 Hz, 2H), 0.86 (dd, *J* = 8.6, 6.1 Hz, 3H).

**<sup>13</sup>C NMR (101 MHz, CDCl<sub>3</sub>)** δ: 170.07, 158.91, 148.86, 148.26, 138.72, 136.55, 136.35, 134.71, 133.06, 130.32, 128.05, 127.55, 121.70, 121.68, 116.49, 115.42, 115.37, 113.56, 55.55, 43.14, 41.03, 21.11, 14.05.

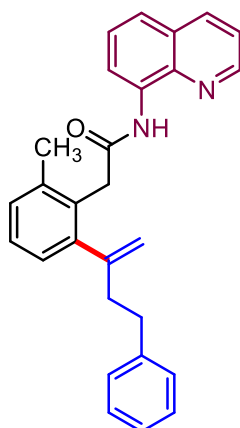

**(Scheme 2, entry 3r)**

**Rf:** 0.5 (eluent: 10% EtOAc/90% hexane)

**Isolation:** Silica gel column (eluent: 5% EtOAc/95% hexane)

**Appearance:** brown sticky liquid

**Yield:** 59%

**<sup>1</sup>H NMR (500 MHz, CDCl<sub>3</sub>)** δ: 9.80 (s, 1H), 8.77 – 8.71 (m, 1H), 8.58 (dd, *J* = 4.2, 1.5 Hz, 1H), 8.09 (dd, *J* = 8.2, 1.4 Hz, 1H), 7.49 (dt, *J* = 8.2, 7.6 Hz, 2H), 7.35 (dd, *J* = 8.3, 4.2 Hz, 1H), 7.25 (m, 1H), 7.21 (d, *J* = 7.2 Hz, 1H), 7.18 – 7.08 (m, 4H), 7.04 (d, *J* = 7.1 Hz, 2H), 5.27 (d, *J* = 1.1 Hz, 1H), 5.09 (s, 1H), 3.94 (s, 2H), 2.78 – 2.70 (m, 2H), 2.70 – 2.64 (m, 2H), 2.40 (s, 3H).

**<sup>13</sup>C NMR (126 MHz, CDCl<sub>3</sub>)** δ: 169.94, 149.32, 148.32, 144.52, 141.85, 138.70, 138.42, 136.30, 134.62, 130.42, 129.77, 128.45, 128.40, 128.04, 127.53, 127.43, 127.14, 125.94, 121.68, 116.48, 115.47, 40.38, 40.22, 34.27, and 20.57.

**DEPT-135 NMR** (101 MHz, CDCl<sub>3</sub>) δ: (aromatic C-H): 148.12, 136.10, 129.57, 128.25, 128.20, 127.33, 127.24, 126.94, 125.74, 121.47, 116.28; (C=CH<sub>2</sub>): 115.27; (CH<sub>2</sub>): 40.18, 40.02, 34.08; and (CH<sub>3</sub>) 20.37.

**HRMS (ESI):** [M-Na]<sup>+</sup> calculated for C<sub>28</sub>H<sub>26</sub>N<sub>2</sub>NaO: 429.1937, found: 429.1938.

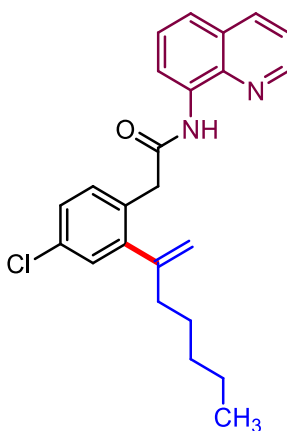

**(Scheme 2, entry 3s)**

**Rf:** 0.5 (eluent: 10% EtOAc/90% hexane)

**Isolation:** Silica gel column (eluent: 5% EtOAc/95% hexane)

**Appearance:** liquid

**Yield:** 62%

**<sup>1</sup>H NMR (500 MHz, CDCl<sub>3</sub>)** δ: 9.82 (s, 1H), 8.72 (dd, *J* = 7.2, 1.7 Hz, 1H), 8.69 (dt, *J* = 4.3, 2.1 Hz, 1H), 8.12 (dd, *J* = 8.3, 1.6 Hz, 1H), 7.53 – 7.47 (m, 1H), 7.43 – 7.37 (m, 2H), 7.32 – 7.27 (m, 2H), 7.19 (d, *J* = 2.2 Hz, 1H), 5.26 (d, *J* = 1.4 Hz, 1H), 5.01 (s, 1H), 3.86 (s, 2H), 2.34 – 2.27 (m, 2H), 1.44 – 1.34 (m, 2H), 1.23 – 1.14 (m, 4H), 0.78 (t, *J* = 7.0 Hz, 3H).

**<sup>13</sup>C NMR (126 MHz, CDCl<sub>3</sub>)** δ: 169.64, 148.37, 145.84, 138.59, 136.43, 134.49, 133.08, 132.16, 130.44, 129.07, 128.64, 128.05, 127.65, 127.53, 121.83, 121.77, 116.50, 115.74, 42.15, 38.34, 31.71, 27.49, 22.60, 14.15.

**HRMS (ESI):** [M-H]<sup>+</sup> calculated for C<sub>24</sub>H<sub>26</sub>ClN<sub>2</sub>O: 393.1728, found: 393.1729.

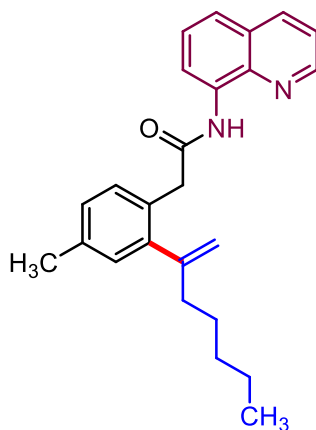

**(Scheme 2, entry 3t)**

**Rf:** 0.55 (eluent: 10% EtOAc/90% hexane)

**Isolation:** Silica gel column (eluent: 4% EtOAc/96% hexane)

**Appearance:** liquid

**Yield:** 70%

**<sup>1</sup>H NMR (500 MHz, CDCl<sub>3</sub>)** δ: 9.83 (s, 1H), 8.74 (dt, *J* = 9.0, 4.5 Hz, 1H), 8.67 – 8.63 (m, 1H), 8.10 (dd, *J* = 8.3, 1.6 Hz, 1H), 7.52 – 7.44 (m, 2H), 7.38 (dd, *J* = 8.3, 4.2 Hz, 1H), 7.35 (d, *J* = 7.8 Hz, 1H), 7.14 (d, *J* = 7.8 Hz, 1H), 7.01 (s, 1H), 5.22 (t, *J* = 4.8 Hz, 1H), 4.98 (d, *J* = 0.8 Hz, 1H), 3.87 (s, 2H), 2.37 (s, 3H), 2.35 – 2.29 (m, 2H), 1.40 (ddd, *J* = 15.4, 9.3, 5.8 Hz, 2H), 1.21 – 1.14 (m, 4H), 0.78 (t, *J* = 7.0 Hz, 3H).

**<sup>13</sup>C NMR (126 MHz, CDCl<sub>3</sub>)** δ: 170.54, 149.62, 148.24, 144.06, 138.67, 136.94, 136.33, 134.71, 130.69, 129.79, 128.72, 128.37, 128.03, 127.55, 121.65, 121.60, 116.44, 114.73, 42.51, 38.62, 31.80, 29.91, 27.57, 22.64, 21.34, and 14.18.

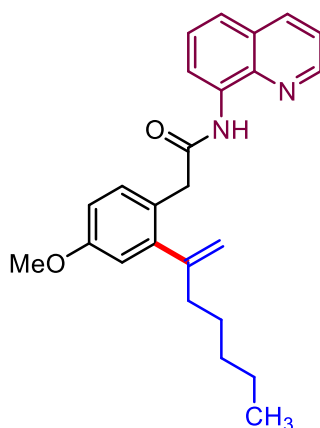

**(Scheme 2, entry 3u)**

**Rf:** 0.3 (eluent: 10% EtOAc/90% hexane)

**Isolation:** Silica gel column (eluent: 5% EtOAc/95% hexane)

**Appearance:** semi solid

**Yield:** 73%

**<sup>1</sup>H NMR (500 MHz, CDCl<sub>3</sub>)** δ: 9.85 (s, 1H), 8.77 – 8.74 (m, 1H), 8.66 (dd, *J* = 4.1, 1.4 Hz, 1H), 8.12 (d, *J* = 7.9 Hz, 1H), 7.55 – 7.45 (m, 2H), 7.41 – 7.36 (m, 2H), 6.88 (dd, *J* = 8.5, 2.8 Hz, 1H), 6.74 (d, *J* = 2.7 Hz, 1H), 5.22 (d, *J* = 1.5 Hz, 1H), 5.00 (d, *J* = 0.6 Hz, 1H), 3.84 (d, *J* = 2.8 Hz, 5H), 2.35 – 2.29 (m, 2H), 1.41 – 1.38 (m, 1H), 1.20 – 1.13 (m, 4H), 0.76 (t, *J* = 5.9 Hz, 3H).

**<sup>13</sup>C NMR (126 MHz, CDCl<sub>3</sub>)** δ: 170.68, 158.67, 149.38, 148.09, 145.43, 134.54, 133.59, 131.87, 130.75, 128.02, 127.57, 123.93, 121.60, 121.58, 114.86, 114.69, 112.96, 77.16, 55.48, 42.02, 38.42, 31.71, 29.84, 27.51, 22.56, 14.11.

**HRMS (ESI):** [M-H]<sup>+</sup> calculated for C<sub>25</sub>H<sub>28</sub>N<sub>2</sub>O<sub>2</sub>: 388.2010, found: 388.2005.

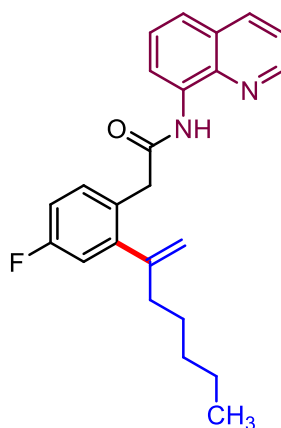

**(Scheme 2, entry 3v)**

**Rf:** 0.5 (eluent: 10% EtOAc/90% hexane)

**Isolation:** Silica gel column (eluent: 5% EtOAc/95% hexane)

**Appearance:** liquid

**Yield:** 55%

**<sup>1</sup>H NMR (500 MHz, CDCl<sub>3</sub>)** δ: 9.82 (s, 1H), 8.73 (dd, *J* = 7.3, 1.4 Hz, 1H), 8.67 (dd, *J* = 4.2, 1.6 Hz, 1H), 8.12 (dd, *J* = 8.3, 1.5 Hz, 1H), 7.52 – 7.46 (m, 2H), 7.43 – 7.38 (m, 2H), 7.06 – 7.00 (m, 1H), 6.92 (dd, *J* = 9.5, 2.7 Hz, 1H), 5.26 (d, *J* = 1.4 Hz, 1H), 5.01

(s, 1H), 3.87 (s, 2H), 2.33 – 2.28 (m, 2H), 1.41 (d,  $J = 10.6$  Hz, 1H), 1.36 (d,  $J = 7.6$  Hz, 1H), 1.23 – 1.12 (m, 4H), 0.77 (t,  $J = 7.0$  Hz, 3H).

**$^{13}\text{C}$  NMR (126 MHz,  $\text{CDCl}_3$ )**  $\delta$ : 170.01, 161.94 (d,  $J = 246.9$  Hz), 148.77, 148.54, 148.33, 146.24, 146.18, 138.60, 136.42, 134.51, 132.49, 132.42, 128.50, 128.05, 127.64, 127.53, 127.44, 122.10, 121.79, 121.74, 116.67, 116.47, 116.00, 115.83, 115.57, 115.43, 115.26, 114.57, 114.41, 42.03, 38.32, 31.71, 27.51, 22.59, and 14.14.

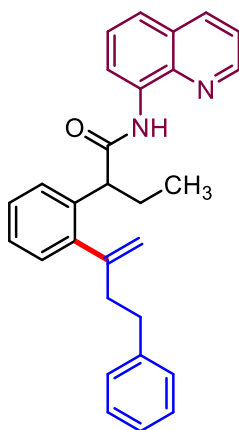

**(Scheme 3, entry 3w)**

**Rf:** 0.5 (eluent: 10% EtOAc/90% hexane)

**Isolation:** Silica gel column (eluent: 5% EtOAc/95% hexane)

**Appearance:** white solid

**Yield:** 54%

**$^1\text{H}$  NMR (400 MHz,  $\text{CDCl}_3$ )**  $\delta$ : 9.88 (s, 1H), 8.77 (dd,  $J = 7.5, 1.5$  Hz, 1H), 8.55 (dd,  $J = 4.2, 1.5$  Hz, 1H), 8.09 (dd,  $J = 8.3, 1.7$  Hz, 1H), 7.61 (dd,  $J = 7.9, 1.1$  Hz, 1H), 7.52 – 7.43 (m, 2H), 7.35 (dd,  $J = 8.3, 4.2$  Hz, 1H), 7.30 (td,  $J = 7.6, 1.5$  Hz, 1H), 7.25 – 7.20 (m, 3H), 7.16 (ddd,  $J = 7.6, 4.0, 1.7$  Hz, 4H), 5.50 (d,  $J = 1.5$  Hz, 1H), 5.19 (s, 1H), 3.92 (dd,  $J = 8.0, 7.0$  Hz, 1H), 2.91 – 2.84 (m, 2H), 2.76 (dd,  $J = 9.9, 5.7$  Hz, 2H), 2.44 – 2.30 (m, 1H), 1.93 – 1.81 (m, 1H), 0.98 (t,  $J = 7.4$  Hz, 3H).

**$^{13}\text{C}$  NMR (101 MHz,  $\text{CDCl}_3$ )**  $\delta$ : 172.59, 149.18, 148.20, 143.23, 141.93, 138.61, 137.16, 136.34, 134.91, 129.05, 128.55, 128.04, 127.95, 127.56, 127.35, 126.85, 126.09, 121.66, 121.49, 116.45, 115.98, 51.82, 40.91, 34.43, 27.33, and 12.91.



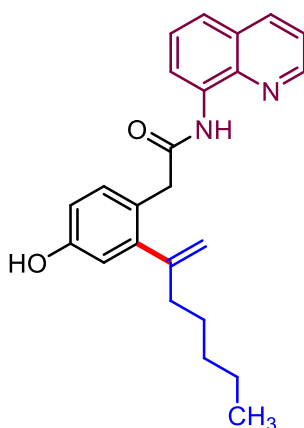

**(Scheme 2, entry 3x)**

**Rf:** 0.4 (eluent: 10% EtOAc/90% hexane)

**Isolation:** Silica gel column (eluent: 6% EtOAc/94% hexane)

**Appearance:** liquid

**Yield:** 43%

**<sup>1</sup>H NMR (400 MHz, CDCl<sub>3</sub>)** δ: 9.87 (s, 1H), 8.74 (dd, *J* = 7.1, 1.8 Hz, 1H), 8.68 – 8.64 (m, 1H), 8.10 (dd, *J* = 8.3, 1.6 Hz, 1H), 7.52 – 7.45 (m, 2H), 7.38 (dd, *J* = 8.3, 4.2 Hz, 1H), 7.26 (s, 1H), 6.78 (dd, *J* = 8.3, 2.7 Hz, 1H), 6.70 (d, *J* = 2.7 Hz, 1H), 5.19 (d, *J* = 1.6 Hz, 1H), 4.99 – 4.94 (m, 1H), 3.82 (d, *J* = 7.0 Hz, 2H), 2.31 – 2.22 (m, 2H), 1.36 (tt, *J* = 20.3, 10.1 Hz, 2H), 1.19 – 1.07 (m, 4H), 0.74 (t, *J* = 7.1 Hz, 3H).

**<sup>13</sup>C NMR (126 MHz, CDCl<sub>3</sub>)** δ: 171.23, 155.29, 149.26, 148.37, 145.65, 138.67, 136.39, 134.49, 132.12, 128.06, 127.52, 123.41, 121.85, 121.70, 116.64, 116.12, 114.87, 114.83, 63.90, 42.09, 38.41, 31.76, 27.58, 22.60, and 14.15.

**HRMS (ESI):** [M-H]<sup>+</sup> calculated for C<sub>24</sub>H<sub>27</sub>N<sub>2</sub>O<sub>2</sub>: 375.2067, found: 375.2071.

**X-ray:** CCDC 1841319

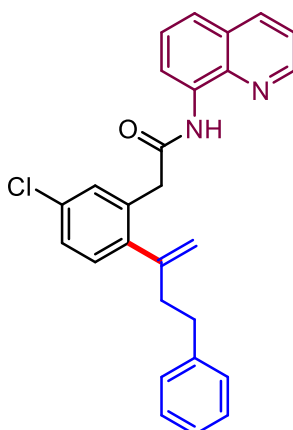

**(Scheme 2, entry 3y)**

**Rf:** 0.45 (eluent: 10% EtOAc/90% hexane)

**Isolation:** Silica gel column (eluent: 6% EtOAc/94% hexane)

**Appearance:** brown sticky liquid

**Yield:** 49%

**<sup>1</sup>H NMR (500 MHz, CDCl<sub>3</sub>)** δ: 9.87 (s, 1H), 8.73 (dd, *J* = 7.1, 1.8 Hz, 1H), 8.68 (dd, *J* = 4.2, 1.7 Hz, 1H), 8.12 (dt, *J* = 11.2, 5.6 Hz, 1H), 7.54 – 7.48 (m, 3H), 7.41 (dd, *J* = 8.3, 4.2 Hz, 1H), 7.29 (dd, *J* = 8.2, 2.2 Hz, 1H), 7.19 (dd, *J* = 10.0, 4.5 Hz, 2H), 7.15 – 7.11 (m, 2H), 7.06 – 7.04 (m, 2H), 5.34 (d, *J* = 1.4 Hz, 1H), 5.06 (s, 1H), 3.85 (s, 2H), 2.75 – 2.70 (m, 2H), 2.69 – 2.63 (m, 2H).

**<sup>13</sup>C NMR (126 MHz, CDCl<sub>3</sub>)** δ: 169.24, 148.43, 147.51, 142.05, 141.55, 138.63, 136.45, 134.46, 133.91, 133.35, 130.83, 130.43, 128.50, 128.46, 128.08, 127.60, 127.56, 126.09, 121.89, 121.81, 116.58, 116.44, 42.50, 39.96, and 34.16.

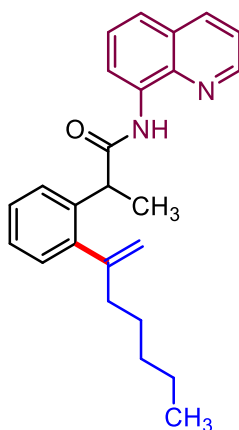

**(Scheme 2, entry 3z)**

**Rf:** 0.55 (eluent: 10% EtOAc/90% hexane)

**Isolation:** Silica gel column (eluent: 4% EtOAc/96% hexane)

**Appearance:** solid

**Yield:** 58%

**<sup>1</sup>H NMR (500 MHz, CDCl<sub>3</sub>)** δ: 9.81 (s, 1H), 8.74 (d, *J* = 7.6 Hz, 1H), 8.66 (d, *J* = 2.9 Hz, 1H), 8.10 (d, *J* = 8.0 Hz, 1H), 7.56 – 7.47 (m, 2H), 7.44 (d, *J* = 8.0 Hz, 1H), 7.38 (dd, *J* = 8.2, 4.2 Hz, 1H), 7.28 (t, *J* = 7.6 Hz, 1H), 7.22 (t, *J* = 7.4 Hz, 1H), 7.15 (d, *J* = 7.5 Hz, 1H), 5.38 (s, 1H), 5.17 (s, 1H), 4.19 (q, *J* = 7.0 Hz, 1H), 2.48 – 2.35 (m, 2H), 1.62 (d, *J* = 6.9 Hz, 5H), 1.52 (dt, *J* = 15.2, 7.6 Hz, 2H), 1.29 (ddd, *J* = 18.1, 12.7, 5.1 Hz, 5H), 0.85 (t, *J* = 7.0 Hz, 3H).

**<sup>13</sup>C NMR (126 MHz, CDCl<sub>3</sub>)** δ: 173.40, 149.99, 148.05, 143.30, 138.54, 136.43, 134.90, 129.05, 128.05, 127.87, 127.59, 127.26, 126.87, 121.64, 121.44, 116.41, 115.12, 44.11, 39.21, 31.84, 27.63, 22.72, 19.34, and 14.25.

**HRMS (ESI):** [M-Na]<sup>+</sup> calculated for C<sub>25</sub>H<sub>28</sub>N<sub>2</sub>NaO: 395.2094, found: 395.2087.

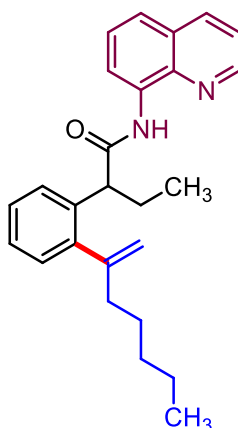

**(Scheme 2, entry 3aa)**

**Rf:** 0.55 (eluent: 10% EtOAc/90% hexane)

**Isolation:** Silica gel column (eluent: 4% EtOAc/96% hexane)

**Appearance:** solid

**Yield:** 59%

**<sup>1</sup>H NMR (500 MHz, CDCl<sub>3</sub>)** δ: 9.87 (s, 1H), 8.77 (dd, *J* = 7.6, 1.2 Hz, 1H), 8.71 (dd, *J* = 4.2, 1.6 Hz, 1H), 8.10 (dd, *J* = 8.3, 1.6 Hz, 1H), 7.61 – 7.58 (m, 1H), 7.51 – 7.43 (m, 2H), 7.39 (dd, *J* = 8.2, 4.2 Hz, 1H), 7.28 (td, *J* = 7.7, 1.3 Hz, 1H), 7.20 (td, *J* = 7.5, 1.2 Hz, 1H), 7.12 (dd, *J* = 7.6, 1.2 Hz, 1H), 5.42 (d, *J* = 1.4 Hz, 1H), 5.14 (s, 1H), 3.92 (t, *J* = 7.5 Hz, 1H), 2.44 – 2.33 (m, 3H), 1.91 – 1.81 (m, 1H), 1.57 – 1.48 (m, 2H), 1.38 – 1.27 (m, 4H), 1.02 – 0.95 (m, 3H), 0.85 (t, *J* = 7.0 Hz, 3H).

**<sup>13</sup>C NMR (126 MHz, CDCl<sub>3</sub>)** δ: 172.73, 150.05, 148.10, 143.74, 138.64, 137.03, 136.37, 134.95, 129.01, 128.05, 127.74, 127.56, 127.23, 126.72, 121.66, 121.46, 116.46, 115.30, 51.75, 39.29, 31.86, 27.60, 27.26, 22.74, 14.25, 12.88.

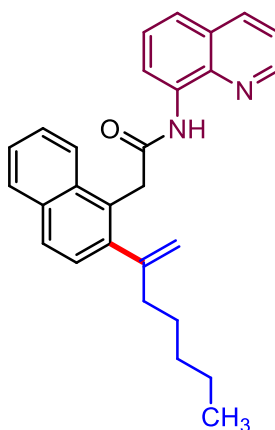

**(Scheme 2, entry 3ab)**

**Rf:** 0.5 (eluent: 10% EtOAc/90% hexane)

**Isolation:** Silica gel column (eluent: 5% EtOAc/95% hexane)

**Appearance:** liquid

**Yield:** 47%

**<sup>1</sup>H NMR (400 MHz, CDCl<sub>3</sub>)** δ: 9.82 (s, 1H), 8.73 (dt, *J* = 4.8, 2.4 Hz, 1H), 8.48 – 8.43 (m, 1H), 8.14 (d, *J* = 8.6 Hz, 1H), 8.04 (dd, *J* = 8.3, 1.5 Hz, 1H), 7.85 (dd, *J* = 10.7, 8.5

Hz, 2H), 7.54 – 7.37 (m, 5H), 7.30 (dd,  $J = 8.3, 4.2$  Hz, 1H), 5.36 (d,  $J = 1.6$  Hz, 1H), 5.27 – 5.24 (m, 1H), 4.40 (s, 2H), 2.47 – 2.42 (m, 2H), 1.47 (dt,  $J = 11.2, 7.5$  Hz, 2H), 1.31 – 1.17 (m, 4H), 0.80 (t,  $J = 7.1$  Hz, 3H).

**$^{13}\text{C}$  NMR (126 MHz,  $\text{CDCl}_3$ )**  $\delta$ : 170.38, 150.20, 147.89, 142.68, 136.53, 136.51, 136.43, 134.52, 133.16, 133.01, 128.73, 128.00, 127.97, 127.57, 127.28, 127.14, 127.01, 125.77, 124.65, 121.62, 121.53, 115.45, 39.91, 38.98, 31.85, 27.60, 22.67, and 14.19.

**HRMS (ESI)**:  $[\text{M}-\text{H}]^+$  calculated for  $\text{C}_{28}\text{H}_{29}\text{N}_2\text{O}$ : 409.2274, found: 409.2275.

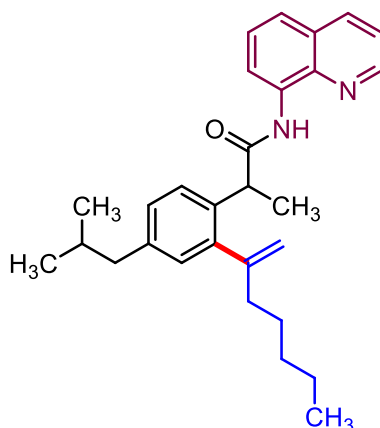

**(Scheme 2, entry 3ac)**

**R<sub>f</sub>**: 0.55 (eluent: 10% EtOAc/90% hexane)

**Isolation**: Silica gel column (eluent: 4% EtOAc/96% hexane)

**Appearance**: solid

**Yield**: 54%

**$^1\text{H}$  NMR (400 MHz,  $\text{CDCl}_3$ )**  $\delta$ : 9.79 (s, 1H), 8.75 (dt,  $J = 8.7, 4.3$  Hz, 1H), 8.61 (dd,  $J = 4.2, 1.7$  Hz, 1H), 8.08 (dd,  $J = 8.3, 1.6$  Hz, 1H), 7.49 (dd,  $J = 10.3, 5.5$  Hz, 1H), 7.44 – 7.41 (m, 2H), 7.36 (dd,  $J = 8.3, 4.2$  Hz, 1H), 7.08 (dd,  $J = 8.0, 1.8$  Hz, 1H), 6.93 (d,  $J = 1.8$  Hz, 1H), 5.34 (d,  $J = 1.7$  Hz, 1H), 5.13 (d,  $J = 1.8$  Hz, 1H), 4.15 (q,  $J = 7.1$  Hz, 1H), 2.45 (d,  $J = 7.2$  Hz, 2H), 2.40 (td,  $J = 7.3, 3.5$  Hz, 2H), 1.86 (dp,  $J = 13.5, 6.8$  Hz, 1H), 1.61 (d,  $J = 7.2$  Hz, 3H), 1.53 – 1.44 (m, 2H), 1.33 – 1.21 (m, 4H), 0.91 (d,  $J = 6.6$  Hz, 6H), 0.83 (t,  $J = 7.1$  Hz, 3H).

**$^{13}\text{C}$  NMR (101 MHz,  $\text{CDCl}_3$ )**  $\delta$ : 173.74, 150.21, 148.05, 143.05, 140.27, 138.69, 136.28, 135.64, 135.01, 129.79, 128.69, 128.04, 127.56, 127.01, 121.61, 121.35, 116.27, 114.85, 45.22, 43.91, 39.22, 31.81, 30.40, 27.64, 22.70, 22.58, 19.26, and 14.20.

**HRMS (ESI)**:  $[\text{M}-\text{H}]^+$  calculated for  $\text{C}_{29}\text{H}_{37}\text{N}_2\text{O}$ : 429.2900, found: 429.2900.

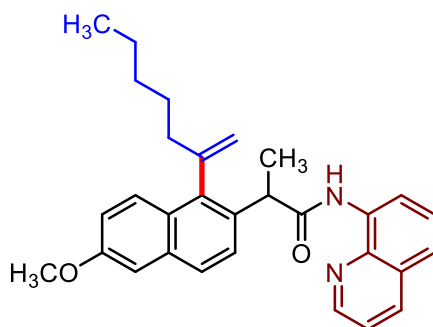

**(Scheme 2, entry 3ad)**

**Rf:** 0.55 (eluent: 10% EtOAc/90% hexane)

**Isolation:** Silica gel column (eluent: 5% EtOAc/95% hexane)

**Yield:** 53%

**<sup>1</sup>H NMR (400 MHz, CDCl<sub>3</sub>)** δ: 9.86 (s, 1H), 8.73 (dd, *J* = 7.5, 1.3 Hz, 1H), 8.60 (dd, *J* = 4.2, 1.6 Hz, 1H), 8.07 (dd, *J* = 8.3, 1.6 Hz, 1H), 7.97 (d, *J* = 11.5 Hz, 2H), 7.75 (d, *J* = 9.0 Hz, 1H), 7.52 – 7.40 (m, 2H), 7.36 (dd, *J* = 8.3, 4.2 Hz, 1H), 7.25 (t, *J* = 4.5 Hz, 2H), 5.49 (d, *J* = 1.4 Hz, 1H), 5.29 (s, 1H), 4.26 (q, *J* = 7.0 Hz, 1H), 4.01 (s, 3H), 2.57 – 2.43 (m, 2H), 1.71 (d, *J* = 7.0 Hz, 3H), 1.56 (dd, *J* = 15.2, 7.6 Hz, 2H), 1.38 – 1.27 (m, 4H), 0.85 (t, *J* = 7.1 Hz, 3H).

**<sup>13</sup>C NMR (126 MHz, CDCl<sub>3</sub>)** δ: 173.27, 152.86, 150, 148.16, 143.44, 138.60, 136.41, 136.03, 134.87, 130.90, 129.25, 128.12, 128.06, 127.55, 126.59, 123.34, 121.71, 121.56, 116.61, 116.41, 115.89, 113.95, 57.24, 44.04, 39.20, 31.82, 27.65, 22.75, 19.81, and 14.28.

**DEPT-135 (126 MHz, CDCl<sub>3</sub>)** δ: (aromatic C-H): 147.93, 136.18, 127.89, 127.32, 126.36, 123.11, 121.48, 121.33, 116.17; (C=CH<sub>2</sub>): 115.65; (aromatic C-H): 113.72; (-OCH<sub>3</sub>): 57.00; (*sp*<sup>3</sup>-C-H): 43.80; (CH<sub>2</sub>): 38.97, 31.59, 27.42; 22.51; (CH-CH<sub>3</sub>): 19.58; and (CH<sub>2</sub>-CH<sub>3</sub>): 14.05.

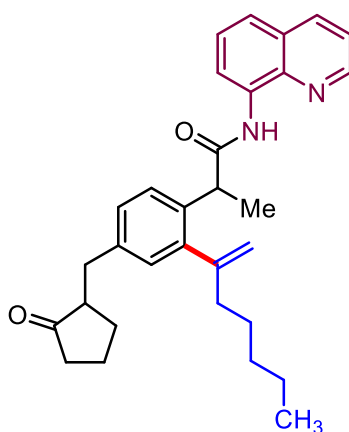

**(Scheme 2, entry 3ae)**

**Rf:** 0.15 (eluent: 10% EtOAc/hexane)

**Isolation:** Silica gel column (eluent: 8% EtOAc/hexane)

**Appearance:** liquid

**Yield:** 62%

**<sup>1</sup>H NMR (500 MHz, CDCl<sub>3</sub>)** δ 9.78 (s, 1H), 8.74 (d, *J* = 7.4 Hz, 2H), 8.65 (d, *J* = 3.6 Hz, 2H), 8.09 (dd, *J* = 8.3, 1.4 Hz, 2H), 7.49 – 7.42 (m, 5H), 7.38 (dd, *J* = 8.3, 4.2 Hz, 2H), 7.09 (d, *J* = 8.7 Hz, 2H), 6.94 (s, 1H), 5.84 (s, 2H), 5.80 (s, 2H), 5.36 (s, 2H), 5.14 (s, 2H), 4.14 (q, *J* = 7.0 Hz, 2H), 3.13 (dd, *J* = 13.8, 3.8 Hz, 2H), 2.22 (q, *J* = 6.9 Hz, 6H), 1.59 (t, *J* = 7.4 Hz, 7H), 1.34 – 1.28 (m, 21H), 0.87 (dd, *J* = 9.5, 4.8 Hz, 12H).

**<sup>13</sup>C NMR (126 MHz, CDCl<sub>3</sub>)** δ 220.49, 220.47, 173.51, 171.86, 152.55, 149.94, 148.03, 143.38, 138.66, 138.59, 138.56, 136.36, 134.93, 129.46, 129.43, 128.42, 128.37, 128.05, 127.58, 127.37, 127.34, 121.64, 121.43, 120.80, 116.36, 115.09, 115.04, 51.22, 51.15, 43.85, 39.18, 39.15, 38.40, 38.38, 35.41, 32.47, 32.13, 31.80, 31.49, 29.90, 29.56, 29.42, 29.41, 27.75, 27.63, 22.89, 22.71, 22.61, 20.74, 19.30, 14.31, 14.21, 14.13, 1.22.

**HRMS (ESI):** [M+H]<sup>+</sup> calculated for C<sub>31</sub>H<sub>37</sub>N<sub>2</sub>O<sub>2</sub>: 469.2850, found: 469.2849.

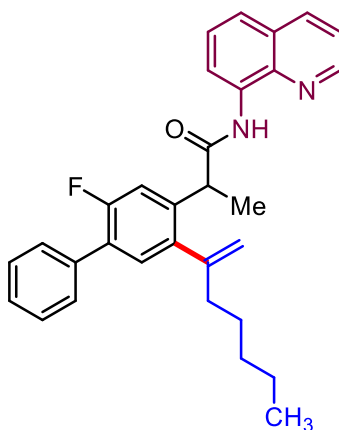

**(Scheme 2, entry 3af)**

**Rf:** 0.3 (eluent: 10% EtOAc/hexane)

**Isolation:** Silica gel column (eluent: 5% EtOAc/hexane)

**Appearance:** liquid

**Yield:** 59%

**<sup>1</sup>H NMR (400 MHz, CDCl<sub>3</sub>)** δ 9.89 (s, 1H), 8.80 – 8.67 (m, 2H), 8.12 (d, *J* = 8.0 Hz, 1H), 7.57 – 7.51 (m, 3H), 7.51 – 7.46 (m, 1H), 7.42 (d, *J* = 7.2 Hz, 2H), 7.39 – 7.35 (m, 2H), 7.22 (d, *J* = 7.9 Hz, 1H), 5.42 (s, 1H), 5.21 (s, 1H), 4.19 (d, *J* = 6.6 Hz, 1H), 2.42 (d, *J* = 6.9 Hz, 2H), 1.68 – 1.62 (m, 4H), 1.58 – 1.49 (m, 3H), 1.29 (s, 5H), 0.89 – 0.83 (m, 4H).

**<sup>13</sup>C NMR (101 MHz, CDCl<sub>3</sub>)** δ 172.6, 159.2 (d, <sup>1</sup>*J*<sub>FC</sub> = 248.46 Hz), 149.0, 148.2, 139.9, 139.8, 139.4, 138.6, 138.5, 136.5, 136.4, 135.7, 134.8, 134.7, 131.0 (d, <sup>3</sup>*J*<sub>FC</sub> = 4.0 Hz), 129.2 (d, <sup>4</sup>*J*<sub>FC</sub> = 3.0 Hz), 128.6, 127.8, 127.6, 127.6, 121.7, 121.6, 116.5, 115.8, 115.59, 114.8 (d, <sup>2</sup>*J*<sub>FC</sub> = 24.2 Hz), 44.1, 39.2, 31.8, 29.9, 27.6, 22.7, 19.4, 14.2.

**HRMS (ESI):** [M+Na]<sup>+</sup> calculated for C<sub>31</sub>H<sub>31</sub>N<sub>2</sub>OFNa: 489.2313, found: 489.2309.

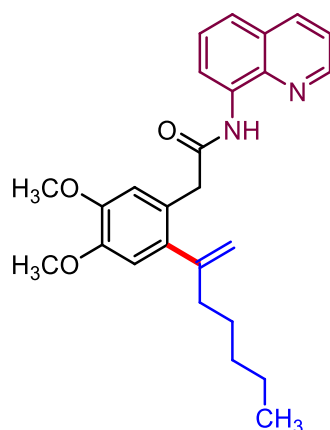

**(Scheme 2, entry 3ag)**

**Rf:** 0.45 (eluent: 10% EtOAc/90% hexane)

**Isolation:** Silica gel column (eluent: 5% EtOAc/95% hexane)

**Appearance:** liquid

**Yield:** 78%

**<sup>1</sup>H NMR (500 MHz, CDCl<sub>3</sub>)** δ: 9.89 (s, 1H), 8.73 (dt, *J* = 8.4, 4.2 Hz, 1H), 8.66 (dd, *J* = 4.2, 1.6 Hz, 1H), 8.11 (dd, *J* = 8.3, 1.5 Hz, 1H), 7.48 (ddd, *J* = 10.1, 8.2, 4.7 Hz, 2H), 7.39 (dd, *J* = 8.3, 4.2 Hz, 1H), 6.95 (d, *J* = 13.8 Hz, 1H), 6.71 (s, 1H), 5.24 (d, *J* = 1.5 Hz, 1H), 5.01 (d, *J* = 1.5 Hz, 1H), 3.91 (s, 3H), 3.90 (s, 3H), 3.84 (s, 2H), 2.35 – 2.29 (m, 2H), 1.43 – 1.36 (m, 2H), 1.22 – 1.13 (m, 4H), 0.78 (t, *J* = 7.0 Hz, 3H).

**<sup>13</sup>C NMR (126 MHz, CDCl<sub>3</sub>)** δ: 170.53, 149.25, 148.35, 148.30, 148.08, 138.73, 136.70, 136.36, 134.68, 128.07, 127.53, 123.83, 121.70, 116.48, 115.17, 113.41, 112.21, 56.20, 56.19, 42.59, 38.80, 31.79, 27.62, 22.65, and 14.18.

**HRMS (ESI):** [M-H]<sup>+</sup> calculated for C<sub>26</sub>H<sub>31</sub>N<sub>2</sub>O<sub>3</sub>: 419.2329, found: 419.2328.

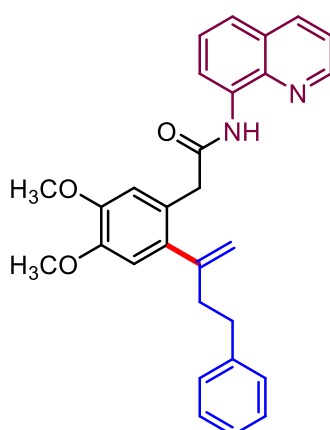

**(Scheme 2, entry 3ah)**

**Rf:** 0.4 (eluent: 10% EtOAc/90% hexane)

**Isolation:** Silica gel column (eluent: 6% EtOAc/94% hexane)

**Appearance:** yellow liquid

**Yield:** 63%

**<sup>1</sup>H NMR (500 MHz, CDCl<sub>3</sub>)** δ: 9.90 (s, 1H), 8.75 (d, *J* = 7.3 Hz, 1H), 8.63 (d, *J* = 2.9 Hz, 1H), 8.16 – 8.03 (m, 1H), 7.50 (dt, *J* = 16.1, 7.9 Hz, 2H), 7.38 (dd, *J* = 8.0, 4.0 Hz, 1H), 7.15 (dt, *J* = 29.6, 7.0 Hz, 3H), 7.06 (d, *J* = 7.3 Hz, 2H), 6.98 (s, 1H), 6.69 (s, 1H), 5.33 (s, 1H), 5.07 (s, 1H), 3.92 (s, 3H), 3.89 (s, 3H), 3.83 (s, 2H), 2.74 (d, *J* = 8.4 Hz, 2H), 2.69 (d, *J* = 8.4 Hz, 2H).

**<sup>13</sup>C NMR (126 MHz, CDCl<sub>3</sub>)** δ: 170.43, 148.47, 148.34, 148.31, 148.14, 141.80, 138.71, 136.38, 136.16, 134.65, 128.49, 128.45, 128.08, 127.54, 126.02, 123.95, 121.72, 116.52, 115.92, 113.51, 112.17, 56.20, 42.60, 40.17, and 34.31.

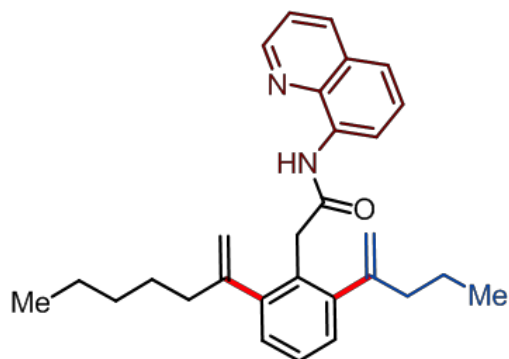

**(Scheme 3, entry 4a)**

**Rf:** 0.6 (eluent:10% EtOAc/90% hexane)

**Isolation:** Silica gel column (eluent: 5% EtOAc/hexane)

**Appearance:** liquid

**Yield:** 56%

**Synthesized by following General rocedure A**

**<sup>1</sup>H NMR (400 MHz, CDCl<sub>3</sub>)** δ 9.69 (s, 1H), 8.70 (dd, *J* = 7.4, 1.3 Hz, 1H), 8.57 (dd, *J* = 4.2, 1.7 Hz, 1H), 8.09 (dd, *J* = 8.3, 1.6 Hz, 1H), 7.49 – 7.43 (m, 2H), 7.36 (dd, *J* = 8.3, 4.2 Hz, 1H), 7.30 (d, *J* = 7.7 Hz, 1H), 7.11 (d, *J* = 7.6 Hz, 2H), 5.15 – 5.14 (2H), 4.98 (2H), 3.93 (s, 2H), 2.33 – 2.25 (m, 4H), 1.41 – 1.34 (m, 4H), 1.15 – 1.12 (m, 4H), 0.74 (t, *J* = 7.1 Hz, 6H).

**<sup>13</sup>C NMR (101 MHz, CDCl<sub>3</sub>)** δ 170.6, 149.9, 148.1, 145.2, 136.2, 134.6, 128.5, 128.0, 127.9, 127.5, 127.0, 121.5, 121.4, 116.2, 114.8, 40.2, 38.4, 31.7, 27.5, 22.6, 14.0.

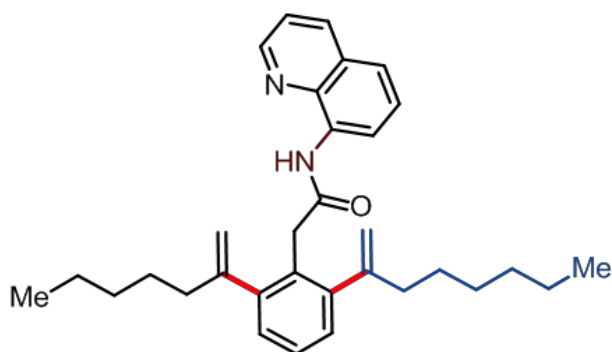

**(Scheme 3, entry 4b)**



**Rf:** 0.6 (eluent:10% EtOAc/90% hexane)

**Isolation:** Silica gel column (eluent: 5% EtOAc/hexane)

**Appearance:** liquid

**Yield:** 52%

**Synthesized by following General rocedure A**

**<sup>1</sup>H NMR (500 MHz, CDCl<sub>3</sub>)** δ 9.69 (s, 1H), 8.70 (d, *J* = 7.5 Hz, 1H), 8.57 (dd, *J* = 4.1, 1.5 Hz, 1H), 8.09 (dd, *J* = 8.3, 1.2 Hz, 1H), 7.49 – 7.43 (m, 2H), 7.36 (dd, *J* = 8.3, 4.2 Hz, 1H), 7.29 (t, *J* = 7.6 Hz, 1H), 7.11 (d, *J* = 7.6 Hz, 2H), 5.15 – 5.14 (2H), 4.98 (s, 2H), 3.94 (s, 2H), 2.30 – 2.27 (m, 4H), 1.37 (dd, *J* = 15.2, 7.5 Hz, 4H), 1.17 – 1.11 (m, 8H), 1.06 (td, *J* = 8.6, 4.6 Hz, 2H), 0.75 (dd, *J* = 11.7, 4.7 Hz, 6H).

**<sup>13</sup>C NMR (126 MHz, CDCl<sub>3</sub>)** δ 170.6, 149.9, 148.1, 145.2, 138.6, 136.2, 134.6, 128.5, 128.0, 127.9, 127.5, 127.0, 121.5, 121.4, 116.2, 114.8, 40.2, 38.5, 38.4, 31.8, 31.7, 27.8, 27.5, 22.7, 22.6, 14.2, 14.1.

**HRMS (ESI):** [M-Na]<sup>+</sup> calculated for C<sub>32</sub>H<sub>40</sub>N<sub>2</sub>NaO: 491.3033, found: 491.3030.

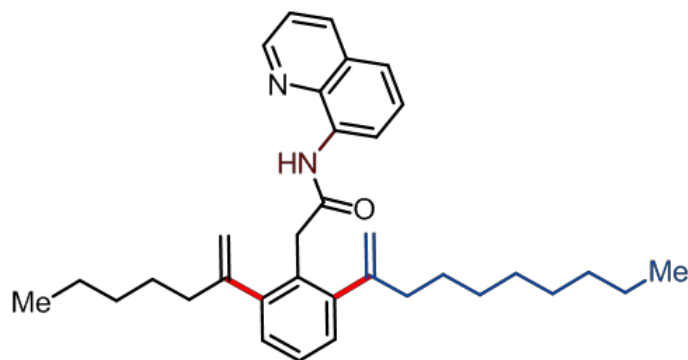

**(Scheme 3, entry 4c)**

**Rf:** 0.65 (eluent:10% EtOAc/90% hexane)

**Isolation:** Silica gel column (eluent:3% EtOAc/hexane)

**Appearance:** liquid

**Yield:** 61% **Synthesized by following General rocedure A**

**<sup>1</sup>H NMR (500 MHz, CDCl<sub>3</sub>)** δ 9.69 (s, 1H), 8.70 (d, *J* = 7.5 Hz, 1H), 8.57 (dd, *J* = 4.1, 1.5 Hz, 1H), 8.09 (dd, *J* = 8.3, 1.4 Hz, 1H), 7.50 – 7.43 (m, 2H), 7.36 (dd, *J* = 8.2, 4.2 Hz, 1H), 7.29 (t, *J* = 7.6 Hz, 1H), 7.11 (d, *J* = 7.6 Hz, 2H), 5.14 (s, 2H), 4.98 (s, 2H), 3.94 (s, 2H), 2.30 – 2.25 (m, 4H), 1.37 (dd, *J* = 14.9, 7.6 Hz, 6H), 1.15 – 1.09 (m, 10H), 0.88 (s, 2H), 0.83 (d, *J* = 7.3 Hz, 3H), 0.74 (t, *J* = 6.9 Hz, 3H).

**<sup>13</sup>C NMR (126 MHz, CDCl<sub>3</sub>)** δ 170.6, 149.9, 149.8, 148.1, 145.2, 138.6, 136.2, 134.6, 128.5, 128.1, 128.0, 127.5, 127.0, 121.5, 121.4, 116.2, 114.8, 40.2, 38.5, 38.4, 31.9, 31.7, 29.6, 29.5, 29.3, 27.9, 27.5, 22.7, 22.5, 14.2, 14.1.

**HRMS (ESI):** [M-K]<sup>+</sup> calculated for C<sub>34</sub>H<sub>44</sub>KN<sub>2</sub>O: 535.3085, found: 535.3084.

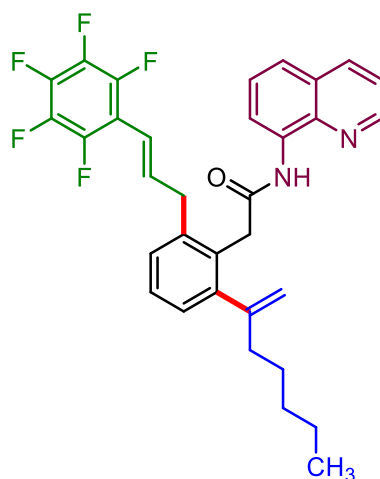

**(Scheme 3, entry 6a)**

**Rf:** 0.35 (eluent: 10% EtOAc/hexane)

**Isolation:** Silica gel column (eluent: 5% EtOAc/hexane)

**Appearance:** liquid

**Yield:** 53%

**Synthesized by following General rocedure B**

**<sup>1</sup>H NMR (500 MHz, CDCl<sub>3</sub>)** δ 9.63 (s, 1H), 8.74 – 8.62 (m, 3H), 8.55 – 8.46 (m, 3H), 8.08 (dd, *J* = 8.3, 1.5 Hz, 3H), 7.52 – 7.44 (m, 5H), 7.35 – 7.29 (m, 4H), 7.17 – 7.12 (m, 3H), 6.87 – 6.76 (m, 3H), 6.06 (dd, *J* = 14.9, 7.5 Hz, 2H), 5.21 (s, 1H), 4.98 (s, 2H), 3.96 (s, 2H), 3.47 (d, *J* = 6.0 Hz, 4H), 2.33 – 2.27 (m, 5H), 1.37 (ddd, *J* = 25.0, 15.7, 7.0 Hz, 18H), 1.17 (dt, *J* = 9.3, 7.2 Hz, 11H), 0.74 (t, *J* = 7.0 Hz, 8H).

**<sup>13</sup>C NMR (126 MHz, CDCl<sub>3</sub>)** δ 169.5, 149.7, 148.0, 145.2, 138.50 – 138.3 (m), 136.16, 134.45, 130.78, 129.2–129.1 (m), 128.74, 127.8, 127.6–127.5 (m), 125.9, 121.5, 116.4, 115.1, 40.0, 38.8, 32.1, 31.7, 29.9, 29.6, 27.5, 26.0, 22.9, 22.6, 14.3, 14.1.

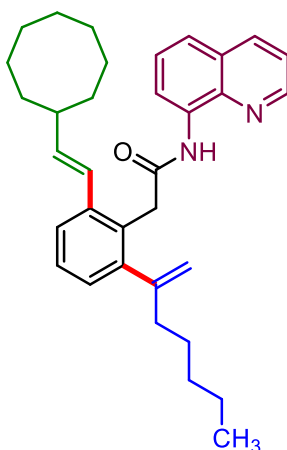

**(Scheme 3, entry 6b)**

**Rf:** 0.4 (eluent: 10% EtOAc/hexane)

**Isolation:** Silica gel column (eluent: 5% EtOAc/hexane)

**Appearance:** liquid

**Yield:** 49%

**Synthesized by following General procedure B**

**<sup>1</sup>H NMR (500 MHz, CDCl<sub>3</sub>)** δ 9.78 (s, 1H), 8.70 (dd, *J* = 7.1, 1.6 Hz, 1H), 8.64 (dd, *J* = 4.1, 1.4 Hz, 1H), 8.13 – 8.08 (m, 1H), 8.05 (s, 1H), 7.59 (d, *J* = 7.4 Hz, 1H), 7.48 (dd, *J* = 6.3, 4.5 Hz, 1H), 7.40 – 7.31 (m, 2H), 7.24 (d, *J* = 0.7 Hz, 1H), 6.38 (d, *J* = 15.7 Hz, 1H), 5.23 (s, 1H), 5.00 (s, 1H), 4.16 (q, *J* = 7.1 Hz, 2H), 4.08 (s, 2H), 2.34 – 2.28 (m, 2H), 1.49 – 1.11 (m, 17H), 0.93 – 0.86 (m, 2H), 0.76 (t, *J* = 5.7 Hz, 2H).

**<sup>13</sup>C NMR (126 MHz, CDCl<sub>3</sub>)** δ 169.16, 166.80, 149.40, 148.23, 145.63, 142.44, 138.61, 136.37, 135.62, 134.51, 131.10, 130.82, 128.01, 127.71, 127.53, 126.19, 121.73, 121.67, 121.58, 116.63, 115.38, 60.68, 38.68, 31.74, 27.49, 22.62, 14.37, 14.15.

**HRMS (ESI):** [M+K]<sup>+</sup> calculated for C<sub>29</sub>H<sub>32</sub>N<sub>2</sub>O<sub>3</sub>K: 495.2045, found: 495.2044.

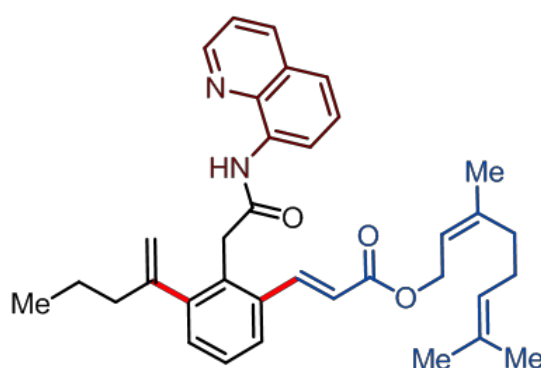

**(Scheme 3, entry 6c)**

**Rf:** 0.40 (eluent: 10% EtOAc/90% hexane)

**Isolation:** Silica gel column (eluent: 5% EtOAc/hexane)

**Appearance:** liquid

**Yield:** 69%

**Synthesized by following General procedure A**

**<sup>1</sup>H NMR (500 MHz, CDCl<sub>3</sub>)** δ 9.76 (s, 1H), 8.70 (d, *J* = 7.1 Hz, 1H), 8.64 (d, *J* = 2.8 Hz, 1H), 8.09 (dd, *J* = 21.1, 11.9 Hz, 2H), 7.57 (d, *J* = 7.8 Hz, 1H), 7.52 – 7.45 (m, 2H), 7.38 (dd, *J* = 8.2, 4.2 Hz, 1H), 7.34 (t, *J* = 7.7 Hz, 1H), 7.23 (d, *J* = 7.4 Hz, 1H), 6.38 (d, *J* = 15.7 Hz, 1H), 5.32 (t, *J* = 6.9 Hz, 1H), 5.23 (s, 1H), 5.06 (t, *J* = 6.3 Hz, 1H), 5.00 (s, 1H), 4.60 (d, *J* = 7.1 Hz, 2H), 4.07 (s, 2H), 2.29 (t, *J* = 7.5 Hz, 2H), 2.08 – 2.01 (m, 4H), 1.71 (s, 3H), 1.64 (s, 3H), 1.56 (s, 3H), 1.44 (dd, *J* = 15.1, 7.5 Hz, 2H), 0.85 (t, *J* = 7.3 Hz, 3H).

**<sup>13</sup>C NMR (126 MHz, CDCl<sub>3</sub>)** δ 168.9, 166.7, 149.1, 148.2, 145.5, 142.6, 142.5, 138.6, 136.3, 135.6, 134.5, 132.3, 131.1, 130.8, 127.9, 127.6, 127.5, 126.1, 123.7, 121.6, 121.5, 119.3, 116.6, 115.5, 61.3, 40.7, 39.4, 32.3, 26.7, 25.8, 23.6, 20.9, 17.8, 13.9.

**HRMS (ESI):** [M-H]<sup>+</sup> calculated for C<sub>35</sub>H<sub>41</sub>N<sub>2</sub>O<sub>3</sub>: 537.3112, found: 537.3112.

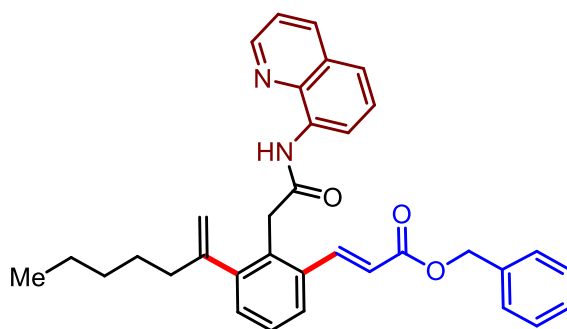

**(Scheme 3, entry 6d)**

**Rf:** 0.35 (eluent: 10% EtOAc/90% hexane)

**Isolation:** Silica gel column (eluent: 5% EtOAc/hexane)

**Appearance:** white solid

**Yield:** 54%

**Synthesized by following General procedure A**

**$^1\text{H}$  NMR (400 MHz,  $\text{CDCl}_3$ )**  $\delta$  9.76 (s, 1H), 8.70 (dd,  $J$  = 6.8, 2.2 Hz, 1H), 8.63 (dd,  $J$  = 4.2, 1.6 Hz, 1H), 8.17 – 8.08 (m, 2H), 7.59 (d,  $J$  = 6.9 Hz, 1H), 7.52 – 7.45 (m, 2H), 7.40 – 7.36 (m, 1H), 7.35 – 7.26 (m, 6H), 7.23 (dd,  $J$  = 7.6, 1.1 Hz, 1H), 6.43 (d,  $J$  = 15.7 Hz, 1H), 5.24 (d,  $J$  = 1.5 Hz, 1H), 5.16 (s, 2H), 5.01 (s, 1H), 4.07 (s, 2H), 2.31 (dd,  $J$  = 13.3, 5.8 Hz, 2H), 1.44 – 1.37 (m, 2H), 1.20 – 1.16 (m, 2H), 0.88 (dd,  $J$  = 8.6, 4.9 Hz, 2H), 0.76 (t,  $J$  = 7.1 Hz, 3H).

**$^{13}\text{C}$  NMR (101 MHz,  $\text{CDCl}_3$ )**  $\delta$  168.95, 166.49, 149.34, 148.17, 145.61, 143.01, 138.58, 136.30, 136.17, 135.47, 134.50, 131.15, 130.88, 128.62, 128.23, 128.21, 127.97, 127.66, 127.50, 126.13, 121.62, 121.06, 116.57, 115.36, 77.16, 66.37, 39.39, 38.63, 31.69, 29.85, 27.44, 22.57, 14.09

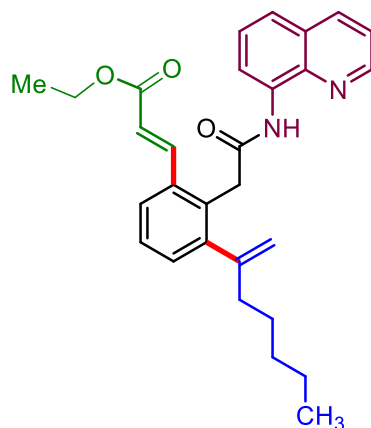

**(Scheme 3, entry 6e)**

**Rf:** 0.15 (eluent: 10% EtOAc/hexane)

**Isolation:** Silica gel column (eluent: 10% EtOAc/hexane)

**Appearance:** liquid

**Yield:** 65%

**Synthesized by following General procedure A**

**$^1\text{H}$  NMR (500 MHz,  $\text{CDCl}_3$ )**  $\delta$  9.78 (s, 1H), 8.71 (dd,  $J$  = 6.9, 2.0 Hz, 1H), 8.64 (dd,  $J$  = 3.9, 1.3 Hz, 1H), 8.11 (dd,  $J$  = 8.3, 1.6 Hz, 1H), 8.07 (d,  $J$  = 15.7 Hz, 1H), 7.59 (d,  $J$  = 6.2 Hz, 1H),

7.49 (s, 1H), 7.47 (d,  $J = 2.1$  Hz, 1H), 7.40 – 7.32 (m, 2H), 7.25 – 7.22 (m, 1H), 6.38 (d,  $J = 15.7$  Hz, 1H), 5.23 (d,  $J = 1.4$  Hz, 1H), 5.01 (s, 1H), 4.16 (q,  $J = 7.1$  Hz, 2H), 4.08 (s, 2H), 2.34 – 2.28 (m, 2H), 1.39 (dt,  $J = 7.4, 5.8$  Hz, 3H), 1.31 (dd,  $J = 6.8, 3.5$  Hz, 2H), 1.27 – 1.20 (m, 6H), 0.76 (t,  $J = 7.0$  Hz, 3H).

**$^{13}\text{C}$  NMR (126 MHz,  $\text{CDCl}_3$ )**  $\delta$  169.1, 166.8, 152.5, 149.4, 148.2, 145.6, 142.4, 138.6, 136.3, 135.6, 134.5, 131.1, 130.8, 128.0, 127.7, 127.5, 126.2, 121.7, 121.7, 121.6, 116.6, 115.4, 77.2, 60.7, 39.4, 38.7, 31.7, 31.5, 29.9, 27.5, 22.6, 14.4, 14.1.

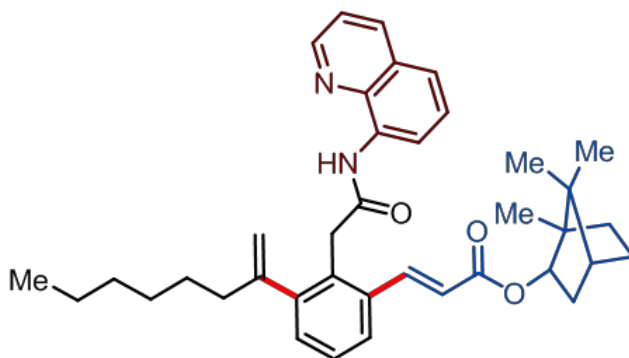

**(Scheme 3, entry 6f)**

**Rf:** 0.5 (eluent: 10% EtOAc/90% hexane)

**Isolation:** Silica gel column (eluent: 5% EtOAc/hexane)

**Appearance:** liquid

**Yield:** 46%

**Synthesized by following General procedure A**

**$^1\text{H}$  NMR (400 MHz,  $\text{CDCl}_3$ )**  $\delta$  9.77 (s, 1H), 8.70 (td,  $J = 6.7, 2.1$  Hz, 1H), 8.68 – 8.62 (m, 1H), 8.11 (dd,  $J = 8.3, 1.6$  Hz, 1H), 7.99 (d,  $J = 15.7$  Hz, 1H), 7.61 – 7.58 (m, 1H), 7.47 (dd,  $J = 8.5, 6.5$  Hz, 2H), 7.40 – 7.36 (m, 1H), 7.33 (d,  $J = 7.7$  Hz, 1H), 7.23 (dd,  $J = 7.6, 1.1$  Hz, 1H), 6.34 (d,  $J = 15.7$  Hz, 1H), 5.23 (s, 1H), 5.00 (s, 1H), 4.67 (dd,  $J = 7.6, 3.8$  Hz, 1H), 4.06 (s, 2H), 2.32 (dd,  $J = 16.2, 8.4$  Hz, 2H), 1.75 – 1.67 (m, 3H), 1.47 (d,  $J = 3.8$  Hz, 2H), 1.39 (d,  $J = 7.9$  Hz, 2H), 1.18 – 1.05 (m, 6H), 0.88 (s, 5H), 0.77 (t,  $J = 6.9$  Hz, 3H), 0.69 (d,  $J = 2.5$  Hz, 6H).

**$^{13}\text{C}$  NMR (101 MHz,  $\text{CDCl}_3$ )**  $\delta$  168.8, 166.2, 149.4, 148.2, 145.6, 141.9, 138.6, 136.3, 135.6, 134.5, 130.9, 130.7, 127.9, 127.6, 127.5, 126.0, 122.1, 121.6, 116.6, 115.3, 81.2, 48.9, 47.0, 45.1, 39.4, 38.9, 38.7, 33.8, 31.8, 29.8, 29.2, 27.8, 27.4, 22.7, 20.1, 19.9, 14.1, 11.4.

**HRMS (ESI):**  $[\text{M-K}]^+$  calculated for  $\text{C}_{38}\text{H}_{46}\text{KN}_2\text{O}_3$ : 617.3140, found: 617.3144.

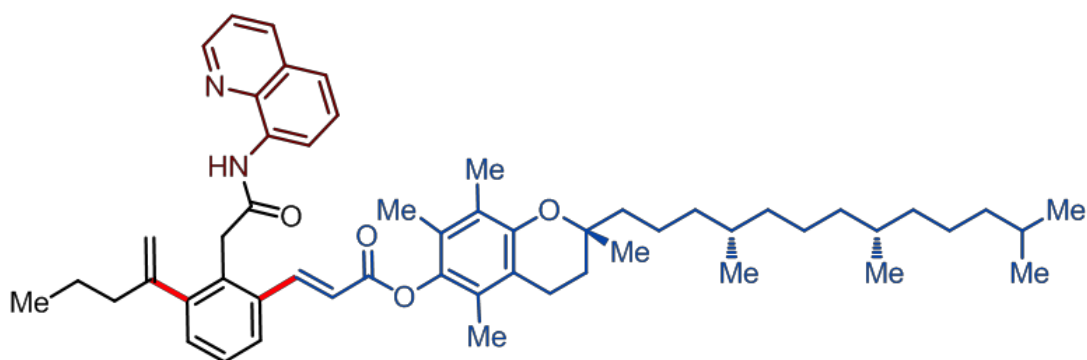

**(Scheme 3, entry 6g)**

**Rf:** 0.5 (eluent: 10% EtOAc/90% hexane)

**Isolation:** Silica gel column (eluent: 5% EtOAc/hexane)

**Appearance:** liquid

**Yield:** 73%

**Synthesized by following General procedure A**

**<sup>1</sup>H NMR (500 MHz, CDCl<sub>3</sub>)** δ 9.82 (s, 1H), 8.70 (d, *J* = 7.2 Hz, 1H), 8.62 (d, *J* = 2.8 Hz, 1H), 8.30 (d, *J* = 15.7 Hz, 1H), 8.09 (d, *J* = 8.2 Hz, 1H), 7.69 (d, *J* = 7.7 Hz, 1H), 7.51 – 7.44 (m, 2H), 7.41 – 7.33 (m, 2H), 7.28 (d, *J* = 7.6 Hz, 1H), 6.59 (d, *J* = 15.7 Hz, 1H), 5.27 (s, 1H), 5.05 (s, 1H), 4.13 (s, 2H), 2.51 (t, *J* = 6.5 Hz, 2H), 2.33 (t, *J* = 7.6 Hz, 2H), 2.02 (s, 3H), 1.85 (s, 3H), 1.81 (s, 3H), 1.58 – 1.43 (m, 8H), 1.43 – 1.33 (m, 6H), 1.26 (s, 3H), 1.21 (s, 3H), 1.15 – 1.11 (m, 3H), 0.89 – 0.83 (m, 20H).

**<sup>13</sup>C NMR (126 MHz, CDCl<sub>3</sub>)** δ 168.9, 165.2, 149.4, 149.1, 148.1, 145.6, 143.7, 140.5, 138.5, 136.2, 135.3, 134.5, 131.4, 131.0, 127.9, 127.7, 127.4, 126.9, 126.1, 125.2, 122.9, 121.6, 121.5, 120.6, 117.3, 116.5, 115.6, 75.1, 40.8, 39.5, 37.6, 37.5, 37.5, 37.4, 32.93, 32.92, 32.87, 32.85, 28.1, 24.96, 24.95, 24.6, 22.9, 22.8, 20.9, 20.7, 19.9, 19.8, 13.9, 12.9, 12.1, 11.9.

**HRMS (ESI):** [M-H]<sup>+</sup> calculated for C<sub>54</sub>H<sub>73</sub>N<sub>2</sub>O<sub>4</sub>: 813.5565, found: 813.5551.

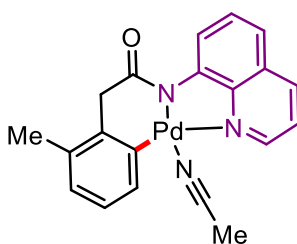

**(Scheme 4, entry C2)**

**<sup>1</sup>H NMR (500 MHz, CD<sub>3</sub>CN)** δ 8.67 (ddd, *J* = 8.9, 6.2, 1.3 Hz, 1H), 8.42 (dd, *J* = 8.4, 1.5 Hz, 1H), 7.56 (dd, *J* = 8.3, 4.7 Hz, 1H), 7.51 (d, *J* = 7.9 Hz, 1H), 7.43 (dd, *J* = 8.1, 1.1 Hz, 1H), 7.16 (d, *J* = 7.4 Hz, 1H), 6.81 (d, *J* = 7.1 Hz, 1H), 6.75 (t, *J* = 7.2 Hz, 1H), 3.92 (s, 1H), 2.30 (s, 2H), 1.95 (s, 1H).

**<sup>13</sup>C NMR (126 MHz, CD<sub>3</sub>CN)** δ 175.01, 150.63, 148.33, 145.25, 144.10, 139.62, 134.86, 133.84, 130.47, 129.33, 127.50, 125.14, 123.19, 122.42, 119.87, 49.09, 21.19.

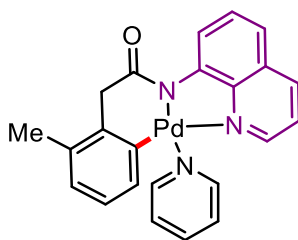

**C3:** complex formation with pyridine

**$^1\text{H}$  NMR (500 MHz,  $\text{CDCl}_3$ )**  $\delta$  8.92 – 8.88 (m, 1H), 8.71 (t,  $J$  = 3.4 Hz, 1H), 8.23 (dd,  $J$  = 8.3, 1.5 Hz, 1H), 7.96 (tt,  $J$  = 7.8, 1.6 Hz, 1H), 7.61 (dd,  $J$  = 4.7, 1.5 Hz, 1H), 7.57 (t,  $J$  = 8.0 Hz, 1H), 7.51 (ddd,  $J$  = 7.7, 4.9, 1.4 Hz, 1H), 7.37 – 7.31 (m, 1H), 7.30 – 7.26 (m, 1H), 6.81 (d,  $J$  = 7.3 Hz, 1H), 6.57 (t,  $J$  = 7.0 Hz, 1H), 6.20 (d,  $J$  = 7.5 Hz, 1H), 4.23 (s, 1H), 2.42 (s, 2H).

**$^{13}\text{C}$  NMR (126 MHz,  $\text{CDCl}_3$ )**  $\delta$  174.86, 153.26, 149.62, 147.65, 145.15, 144.37, 139.81, 138.47, 138.40, 133.60, 132.80, 129.41, 127.08, 126.16, 124.50, 124.32, 120.75, 118.79, 48.67, 21.73.

## 2.4. Mechanistic investigation

**Labelling Experiment: determination of product distribution (3d/ $d_4$ -3d):**

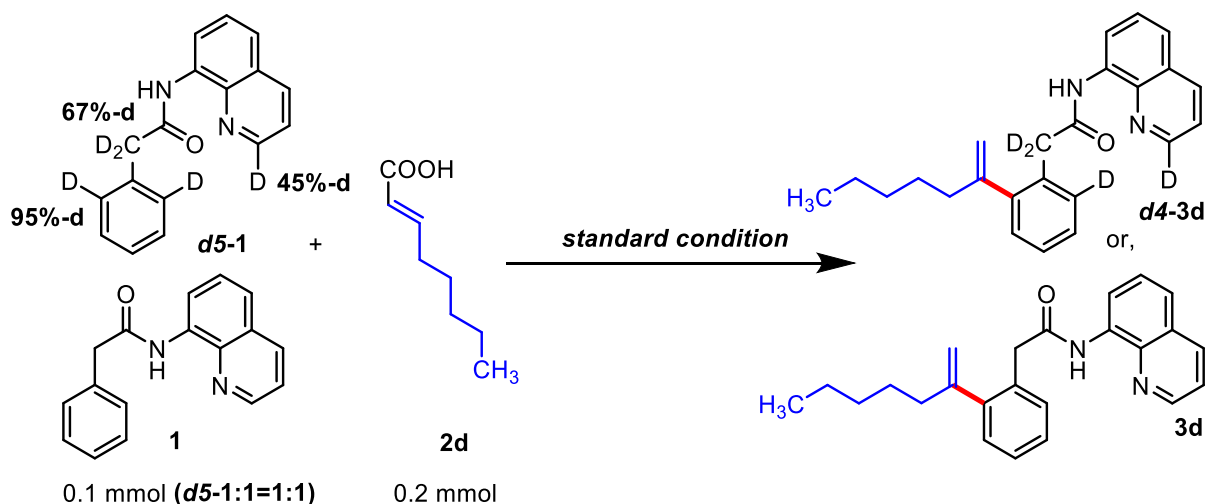

**Procedure:** In a clean, oven-dried screw cap reaction tube containing magnetic stir-bar, 2-phenyl-N-(quinolin-8-yl)acetamide (0.05 mmol), **d5-1** (0.05 mmol),  $\text{Pd}(\text{OAc})_2$  (10 mol%, 0.01 mmol), neocuproine (20 mol%, 0.02 mmol), copper (II) carbonate basic (1 equiv, 0.1 mmol), copper (II) fluoride (1 equiv, 0.1 mmol) were weighed. Then,  $\alpha$ ,  $\beta$ -unsaturated octenoic acid (2 equiv, 0.2 mmol) was transferred through micro pipette. Common laboratory syringe was used to introduce *t*-BuOH (2 mL) into the reaction mixture. Finally, the tube was placed in a preheated oil bath at 130 °C and the reaction was stirred (at 850 rpm) vigorously for 24 h. After detaching the reaction, it was cooled to room temperature and filtered through celite pad using ethyl acetate (30 mL). Excess solvent was removed in rotatory evaporator and desired compound was purified by column chromatography through silica gel (100-200 mesh size) using PET-ether / ethyl acetate as eluent.

<sup>1</sup>H NMR of deuterated starting material:

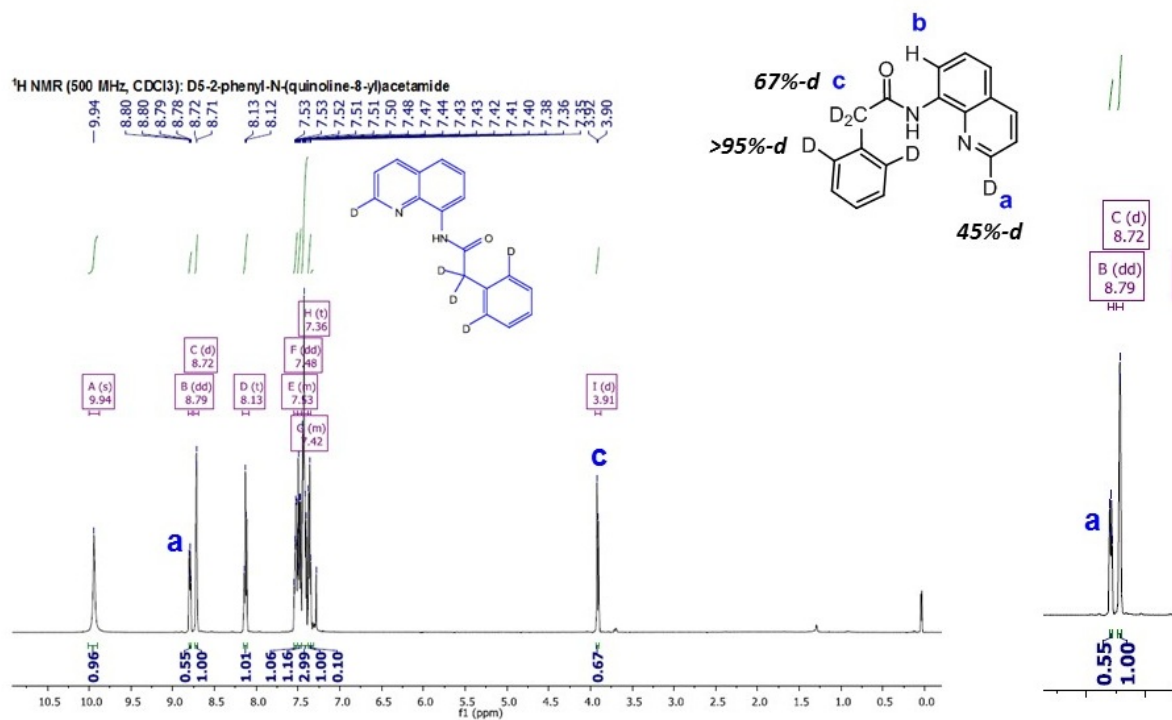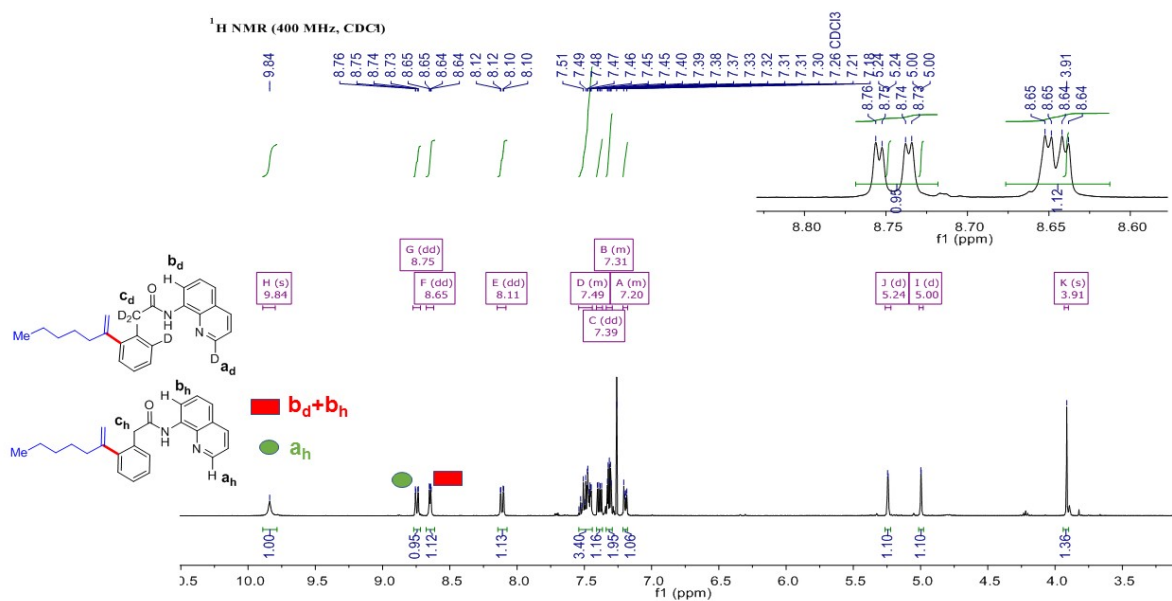



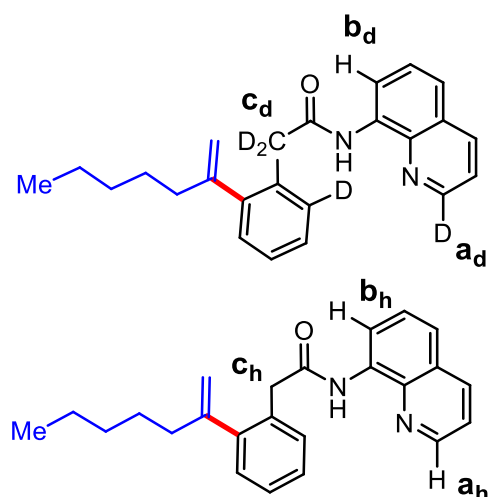

Value for  $b_d + b_h = 1.12$

Value for  $a_h = 0.95$  (ideal case)

One proton integration for deuterated compound =  $(1.12 - 0.95) = 0.17$  (ideal case)

But, actual contribution is 45%-d ( $a_d$ )

So, one proton integration for deuterated compound =  $0.17 \times (100/45) = 0.37$

One proton integration for deuterated compound =  $(1 - 0.37) = 0.63$

As a result,  $P_H/P_D = 0.63/0.37 = 1.7$

### Kinetic experiment:

Kinetic study was performed by monitoring the reaction of 2-phenyl-N-(quinolin-8-yl)acetamide with 2-hexenoic acid. Standard reaction protocol was followed for all the reactions. Amount of product in each reaction was measured by gas chromatography using *n*-decane as internal standard.

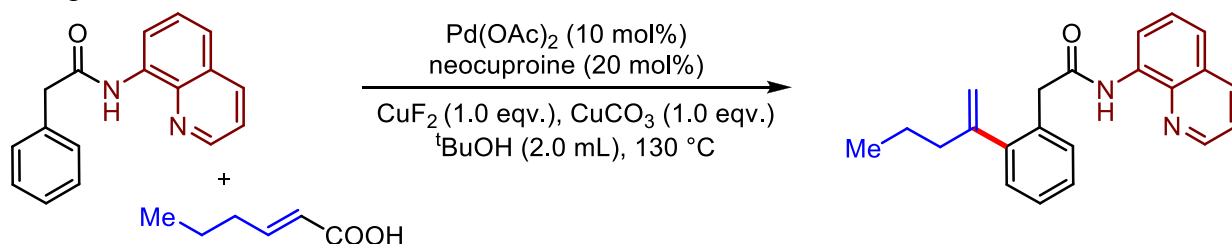

| Reagent                              | SET-1     | SET-2    | SET-3    | SET-4     |
|--------------------------------------|-----------|----------|----------|-----------|
| Amide                                | 0.05 mmol | 0.1 mmol | 0.2 mmol | 0.25 mmol |
| Olefin                               | 0.2 mmol  | 0.2 mmol | 0.2 mmol | 0.2 mmol  |
| Pd(OAc) <sub>2</sub>                 | 10 mol%   | 10 mol%  | 10 mol%  | 10 mol%   |
| Neocuproine                          | 20 mol%   | 20 mol%  | 20 mol%  | 20 mol%   |
| CuF <sub>2</sub> & CuCO <sub>3</sub> | 1 equiv.  | 1 equiv. | 1 equiv. | 1 equiv.  |
| <i>t</i> -BuOH                       | 2 mL      | 2 mL     | 2 mL     | 2 mL      |

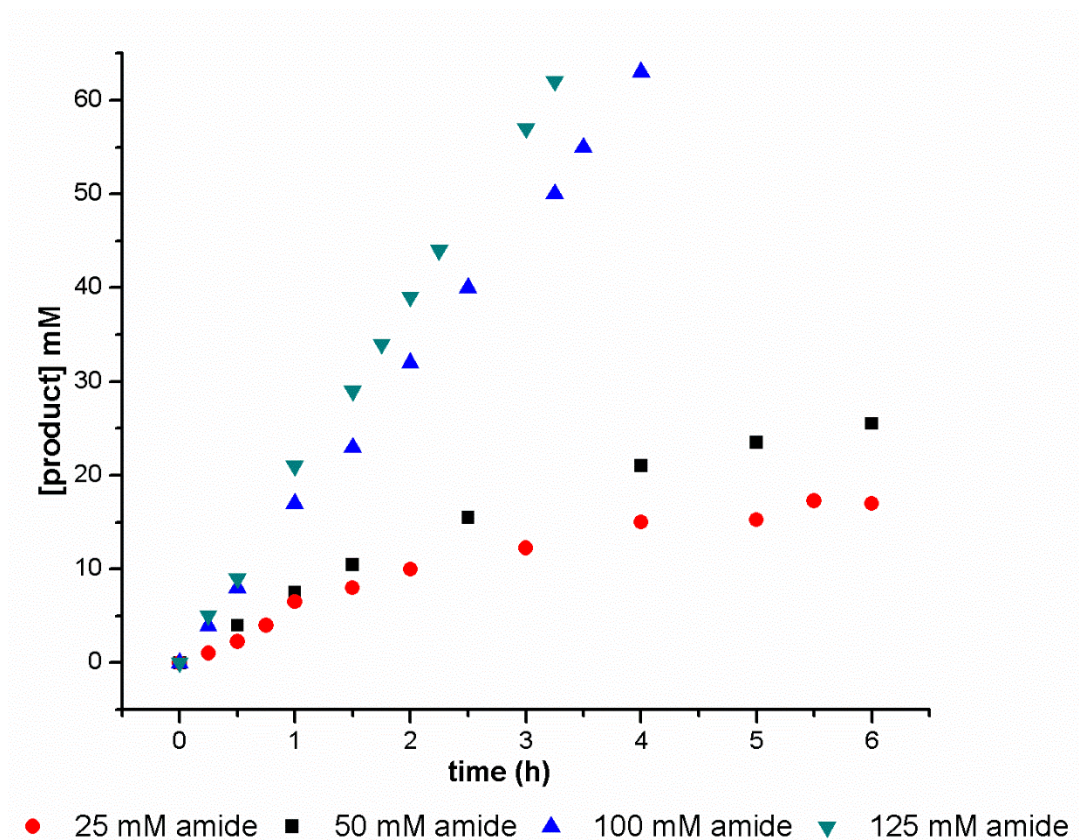

**Figure S1.** Product concentration (mM) vs time (h) plot

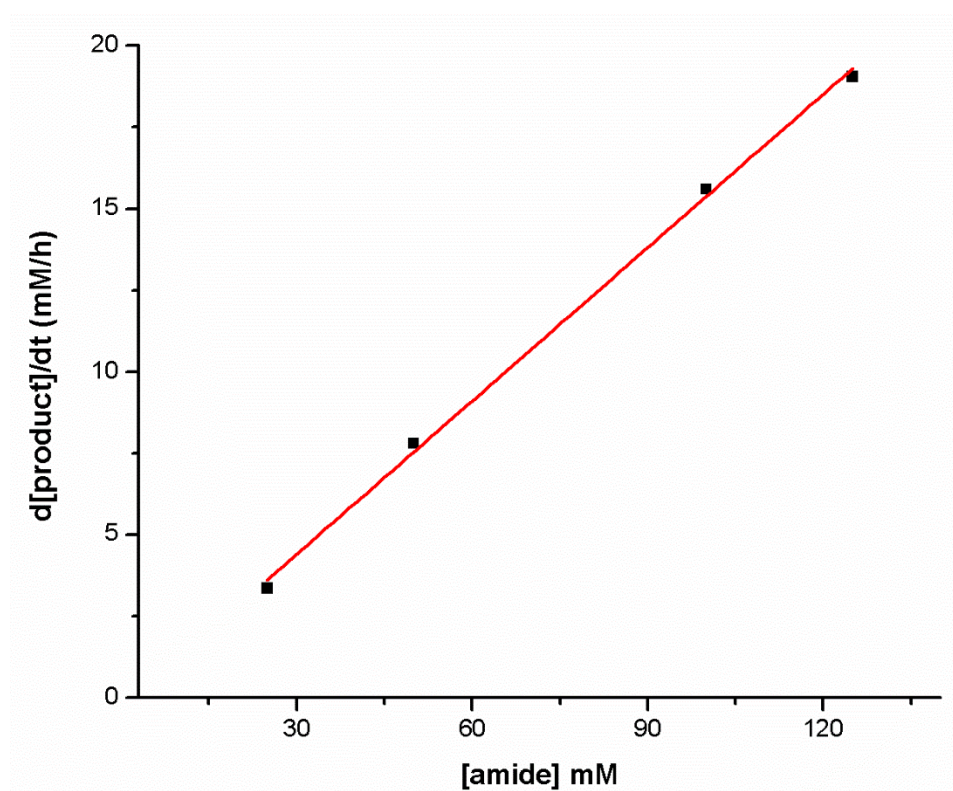

**Figure S2.** Initial amide concentration (mM) vs rate of product formation (mM/h) plot

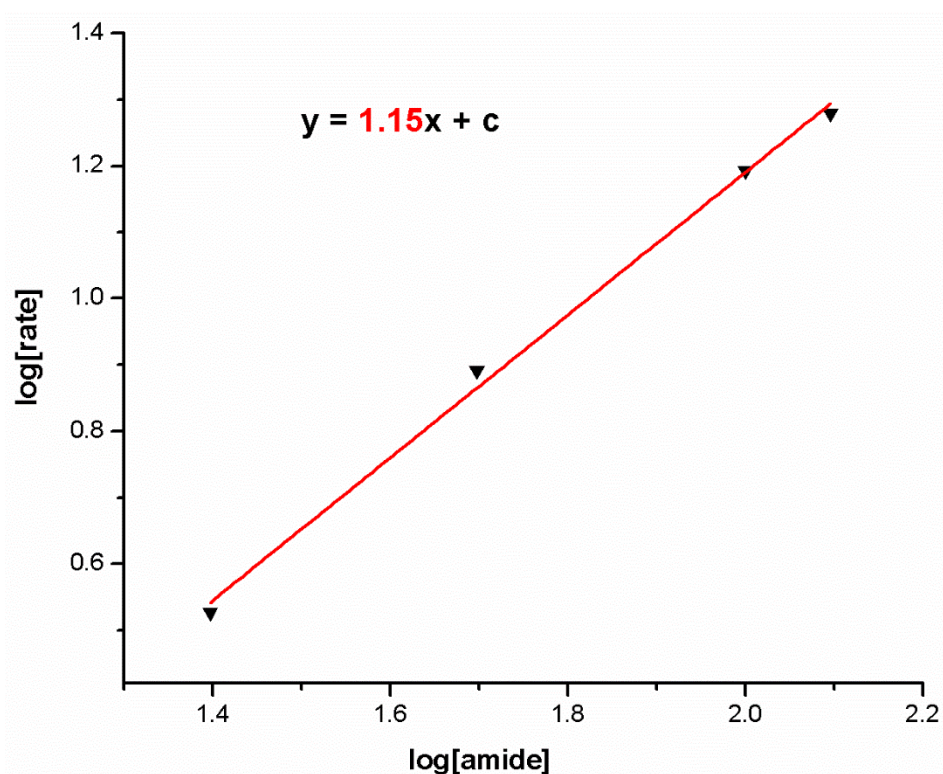

**Figure S3.** Logarithm plot of initial amide concentration vs rate of product formation

Fig 3 shows the logarithmic plot of initial concentration against the rate of the reaction, furnishing a straight line with a slope of 1.15. **So, order with respect to amide coupling partner is ~1.**

| Reagent                              | SET-5     | SET-6    | SET-7    |
|--------------------------------------|-----------|----------|----------|
| Amide                                | 0.1 mmol  | 0.1 mmol | 0.1 mmol |
| Olefin                               | 0.15 mmol | 0.3 mmol | 0.4 mmol |
| Pd(OAc) <sub>2</sub>                 | 10 mol%   | 10 mol%  | 10 mol%  |
| Neocuproine                          | 20 mol%   | 20 mol%  | 20 mol%  |
| CuF <sub>2</sub> & CuCO <sub>3</sub> | 1 equiv.  | 1 equiv. | 1 equiv. |
| <i>t</i> -BuOH                       | 2 mL      | 2 mL     | 2 mL     |

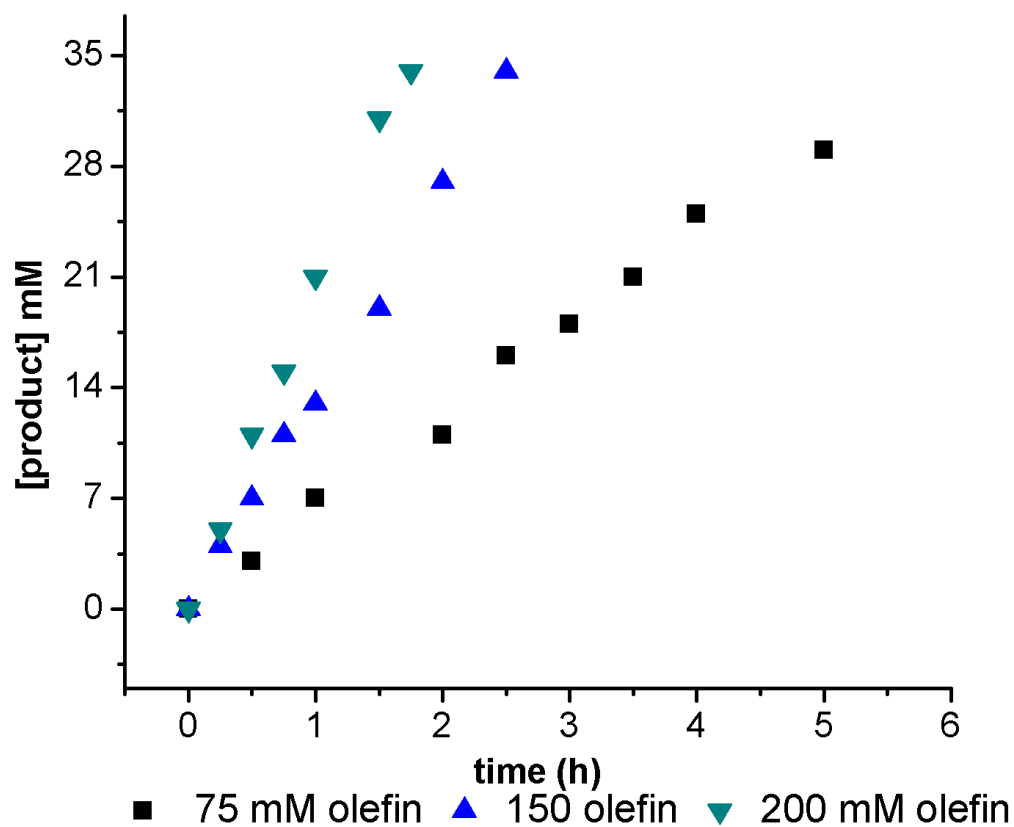

**Figure S4.** Product concentration (mM) vs time (h) plot

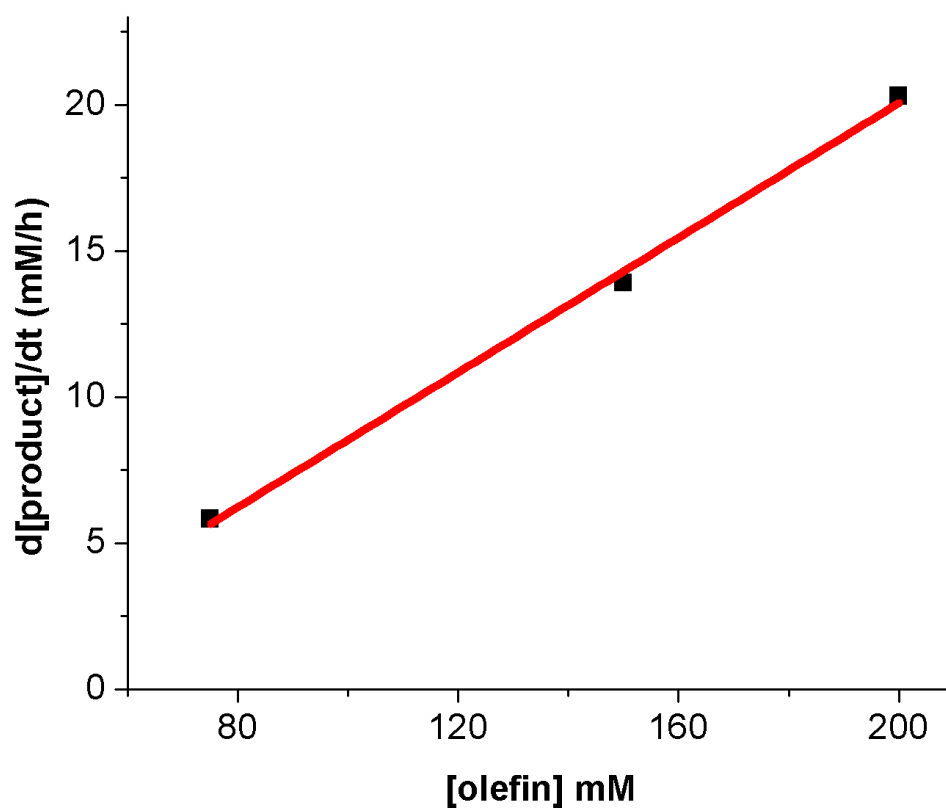

**Figure S5.** Initial olefin concentration (mM) vs rate of product formation (mM/h) plot

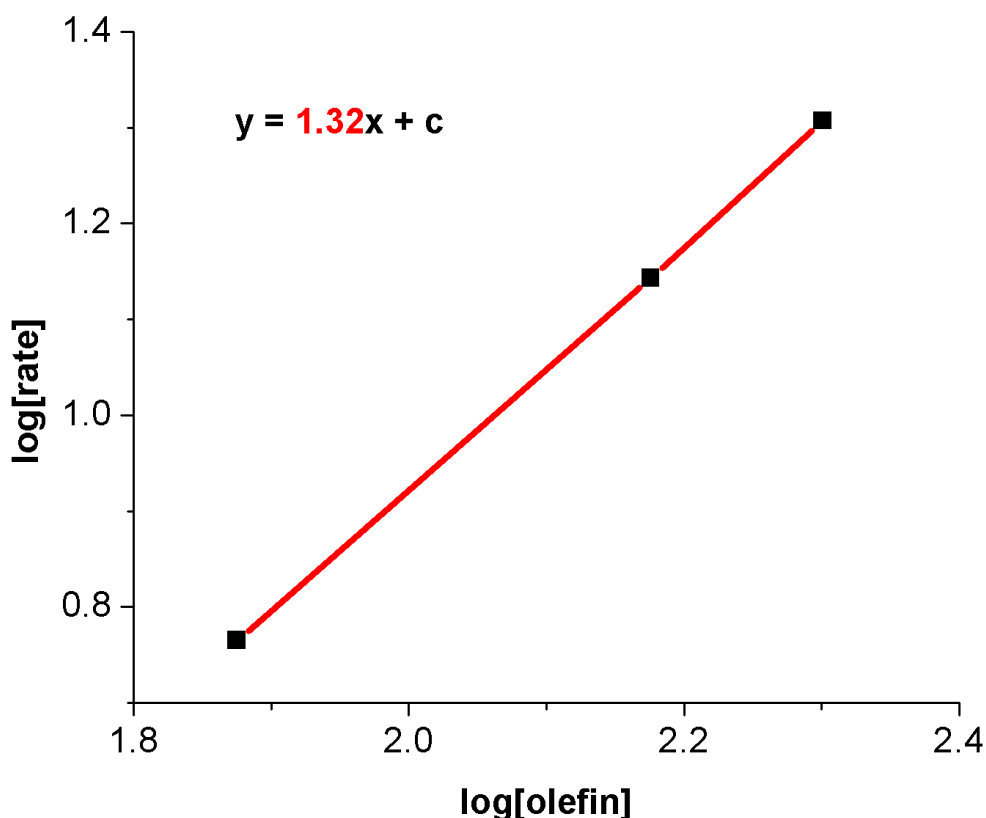

**Figure S6.** Logarithm plot of initial amide concentration vs rate of product formation  
Logarithmic plot of initial concentration against the rate of the reaction furnishing a straight line with a slope of 1.32 (~1). **So, the reaction is first order with respect to olefin coupling partner.**

**Kinetic isotope effect:** Kinetic isotope effect study was performed by monitoring the reaction of 2-phenyl-N-(quinolin-8-yl)acetamide derivative (non-deuterated and deuterated) with 2-hexenoic acid. All the reactions were performed under the standard reaction condition. Amount of product formation in each reaction was measured by  $^1\text{H}$  NMR spectroscopy using 1,3,5-trimethoxy benzene as internal standard.

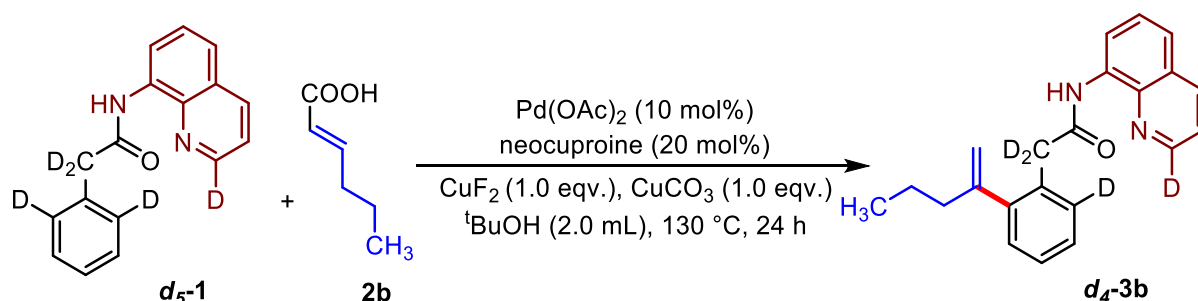

**SET-8:**

| Reagent | Amount    |
|---------|-----------|
| Amide   | 0.05 mmol |



|                                      |          |
|--------------------------------------|----------|
| Olefin                               | 0.2 mmol |
| Pd(OAc) <sub>2</sub>                 | 10 mol%  |
| Neocuproine                          | 20 mol%  |
| CuF <sub>2</sub> & CuCO <sub>3</sub> | 1 equiv  |
| <i>t</i> -BuOH                       | 2 mL     |

**Initial rate for SET-8** ( $R_D$ ) =  $k_D$  [amide]<sup>x</sup> [olefin]<sup>y</sup>.....(f) [ $k_D$  = rate constant]  
Following the reaction kinetics for the **SET-8** we got the following plot:

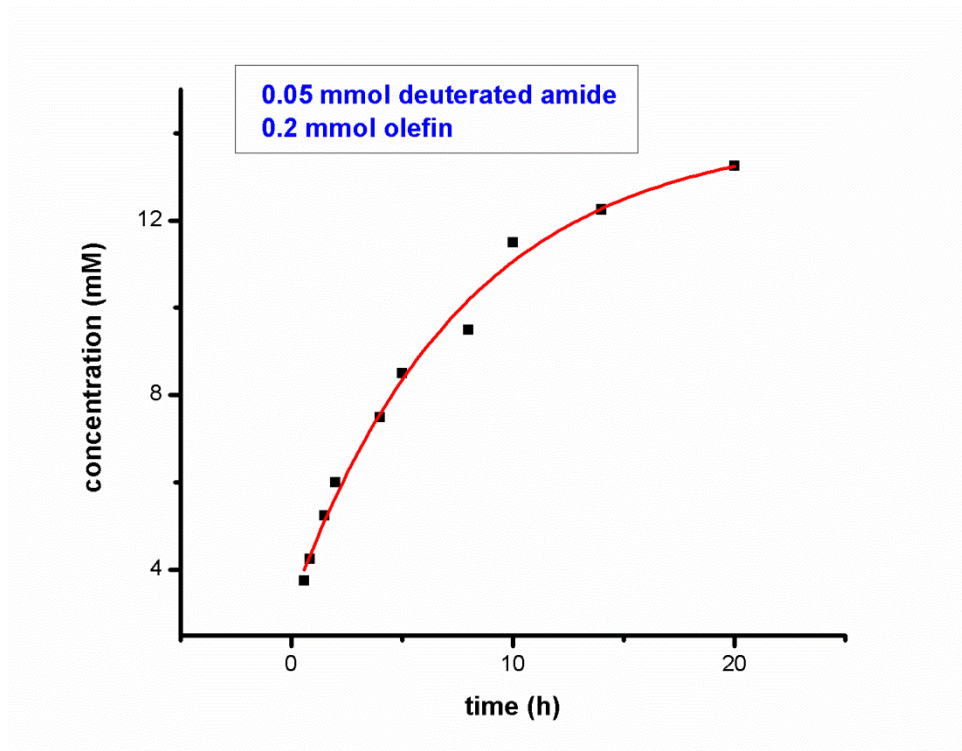

**Figure S7.** Concentration (mM) vs time (h) plot for run 4

$$\begin{aligned}
 (R_D) &= k_D [\text{amide}]^x [\text{olefin}]^y \\
 \text{or, } 2.368 &= k_D [0.05]^x [0.2]^y \dots\dots\dots(g) \\
 \text{From SET-1 we get, } (R_H) &= k_H [\text{amide}]^x [\text{olefin}]^y \\
 \text{or, } 3.36 &= k_H [0.05]^x [0.2]^y \dots\dots\dots(h) \\
 \text{Comparing eq. (g) and (h)} \\
 k_H / k_D &= 3.36/2.368 \\
 \text{or, } k_H / k_D &= 1.42 \\
 \text{So, kinetic isotope effect value is 1.4}
 \end{aligned}$$

**Intermediate synthesis (C1):**

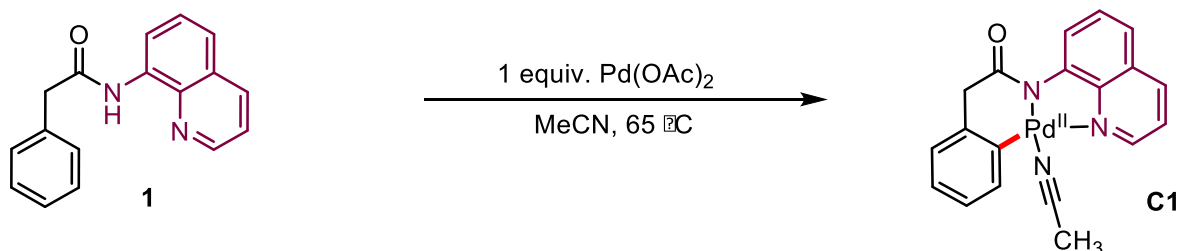

A clean, oven-dried screw cap reaction tube with previously placed magnetic stir-bar was charged with 2-phenyl-N-(quinolin-8-yl)acetamide (1 mmol, 262mg). In this tube,

palladium acetate (1 mmol, 1 equiv) was added into the reaction tube. Then 4 mL dry acetonitrile was transferred to this reaction mixture by common laboratory syringe. The reaction mixture was vigorously stirred (800 rpm on Heidolph MR Hei-Standard stirrer) for 5 h in a preheated oil bath of 65 °C. Insoluble part of the reaction mixture was filtered out by using acetonitrile. Finally, the clean solution was evaporated and again diluted with minimum amount of acetonitrile. The complex was recrystallized from acetonitrile (85% yield). ESI-MS and NMR of the metal complex was recorded in acetonitrile.

Characterization data for the above complex matched with the previously reported literature data.<sup>2</sup>

Follow the section 2.7 for the preparation of **C2**

### Catalytic competence:

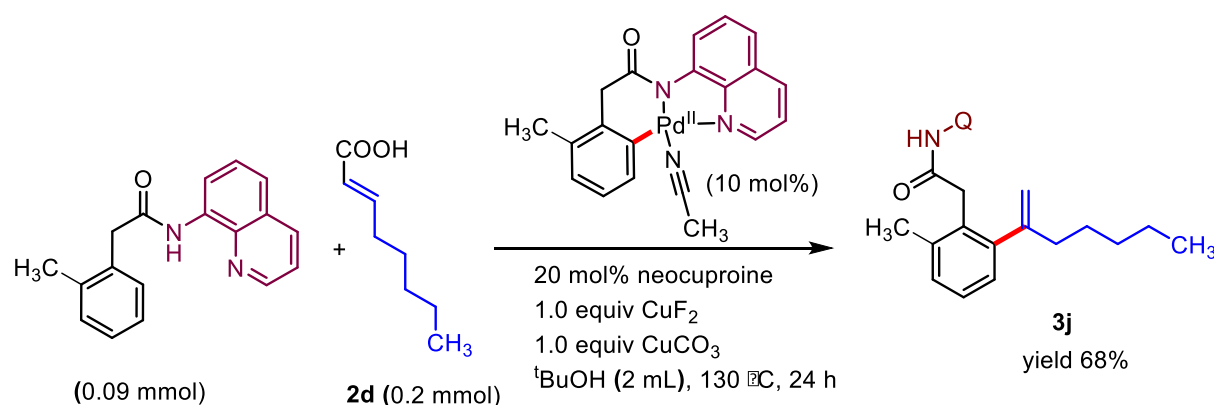

In a clean, oven-dried screw cap reaction tube containing magnetic stir-bar, *o*-tolyl acetamide of 8-amino quinoline (0.09 mmol), aryl palladium complex (10 mol%, 0.01 mmol), neocuproine (20 mol%, 0.02 mmol), copper (II) carbonate basic (1 equiv, 0.1 mmol), copper (II) fluoride (1 equiv, 0.1 mmol) were weighed. Then, 2-octenoic acid (2 equiv, 0.2 mmol) was transferred through micro pipette. Solvent was introduced in the reaction medium by common laboratory syringe. Then the tube was placed in a preheated oil bath at 130 °C and the reaction were stirred (at 850 rpm) vigorously for 24 h. After detaching the reaction, it was cooled to room temperature and filtered through celite pad using ethyl acetate (30 mL). Excess solvent was removed in rotatory evaporator and the desired compound was extracted using EtOAc-saturated NaHCO<sub>3</sub> and combined organic layer was dried over Na<sub>2</sub>SO<sub>4</sub>. Finally, it was concentrated in reduced pressure and was purified by column chromatography through silica gel (100-200 mesh size) using PET-ether / ethyl acetate as eluent.

### <sup>1</sup>H NMR study:

In a clean oven-dried vial (20 mL volume), 0.025 mmol of aryl-palladium complex (**C1**) was added. Then, 2-pentenoic acid (0.025 mmol, 1 equiv) was added into the reaction tube followed by 2 mL of CDCl<sub>3</sub> was transferred into the reaction mixture by common laboratory syringe. The reaction mixture was vigorously stirred (600 rpm on Heidolph MR Hei-Standard stirrer) for 24 h in room temperature. In a regular

interval, 200  $\mu\text{L}$  of reaction mixture was taken out from the medium and diluted with additional solvent. This solution was utilized for recording the NMR spectra.

### Cu and ligand complex formation study:

For this study, all the experiments were performed following the general procedure described in section 2.2. For all other cases except standard condition, reaction has been performed without amide and olefin. Other notable deviations from standard condition were listed below:

1. Copper salts were not utilized.
2. Palladium-catalyst was not used in the case.

| <i>Reaction-1</i>                                                                                                             | <i>Reaction-2</i>                                                                                                                     | <i>Reaction-3</i>                                                                                                                                                 | <i>Reaction-4</i>                                                                                                      |
|-------------------------------------------------------------------------------------------------------------------------------|---------------------------------------------------------------------------------------------------------------------------------------|-------------------------------------------------------------------------------------------------------------------------------------------------------------------|------------------------------------------------------------------------------------------------------------------------|
| $\text{Pd}(\text{OAc})_2$<br>neocuproine<br> | neocuproine<br>$\text{CuF}_2$<br>$\text{CuCO}_3$<br> | $\text{Pd}(\text{OAc})_2$<br>neocuproine<br>$\text{CuF}_2 + \text{CuCO}_3$<br> | standard<br>reaction<br>mixture<br> |

**Figure S8.** Cu-ligand complexation studies

### Cu and ligand complex formation study by UV-vis spectroscopy:

For this study, all the experiments were performed following the general procedure described in section 2.2. For all the cases, reaction has been performed without amide and olefin. 20  $\mu\text{L}$  of reaction mixture was taken out from the medium and diluted with 980  $\mu\text{L}$  additional solvent. This solution was utilized for recording the spectra.



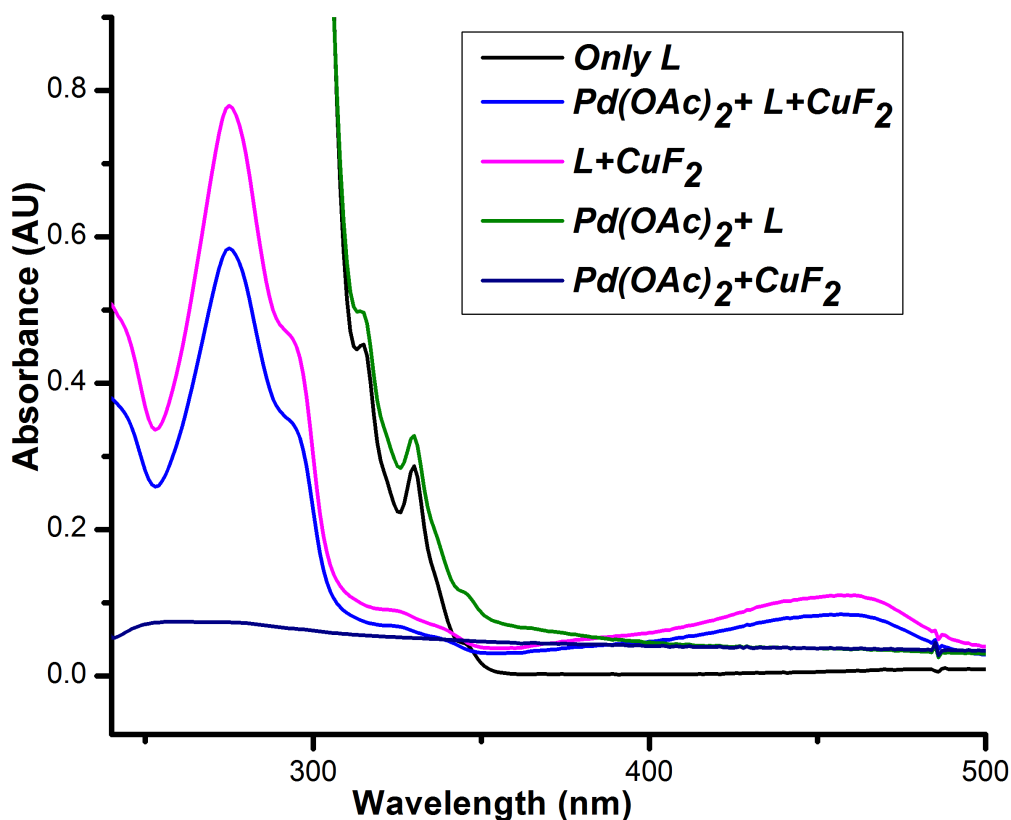

**Figure S9.** UV-Vis study

**IR study:** Following the above described procedure, reaction was monitored in a regular time interval. For the IR study, we used acetonitrile solvent instead of deuterated chloroform. From the reaction medium, 5  $\mu\text{L}$  of solution was used for recording IR spectra.

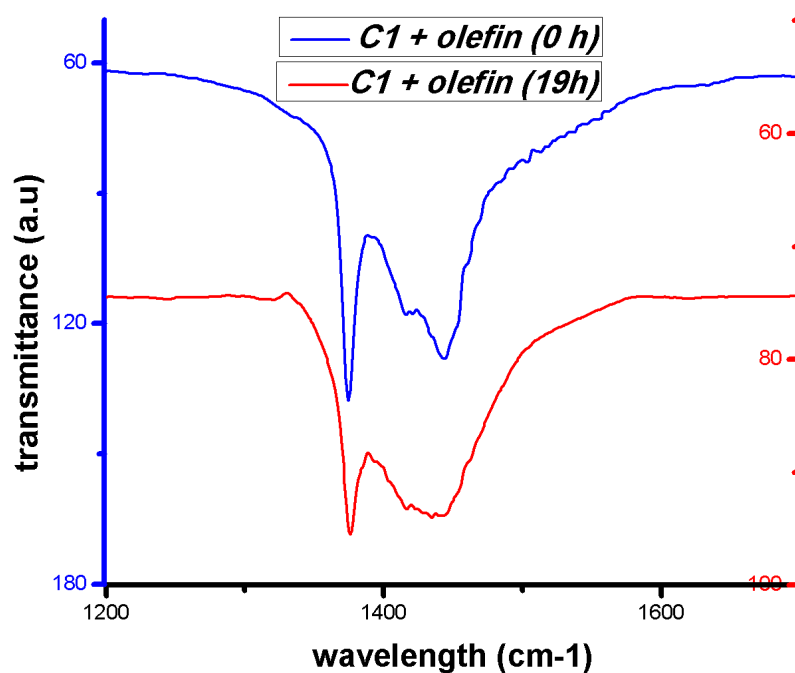

**Figure S10.** IR study

### Synthesis of Cu-neocuproine complex:

[Cu(neocuproine)<sub>2</sub>Cl] complex was synthesized in gm scale by following literature reported procedure.<sup>3</sup>

### Decarboxylation Study:

**Condition 1:** In a clean, oven-dried screw cap reaction tube containing magnetic stir-bar, 5-phenyl-2-pentenoic acid (0.05 mmol), palladium acetate (10 mol%, 0.01 mmol), neocuproine (20 mol%, 0.02 mmol), copper (II) carbonate basic (1 equiv, 0.1 mmol), copper (II) fluoride (1 equiv, 0.1 mmol) were weighed. Then, 1 mL of <sup>t</sup>BuOH solvent was introduced in the reaction medium and it was placed in a preheated oil bath (130 °C) for vigorous stirring (850 rpm). After 24 h, the reaction was cooled to room temperature and filtered through celite pad using minimum amount of ethyl acetate. After removing excess solvent, it was used directly for GC-MS analysis.

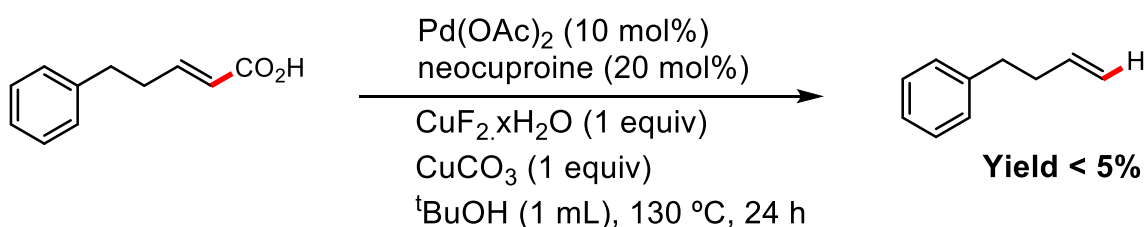

GC-MS spectra

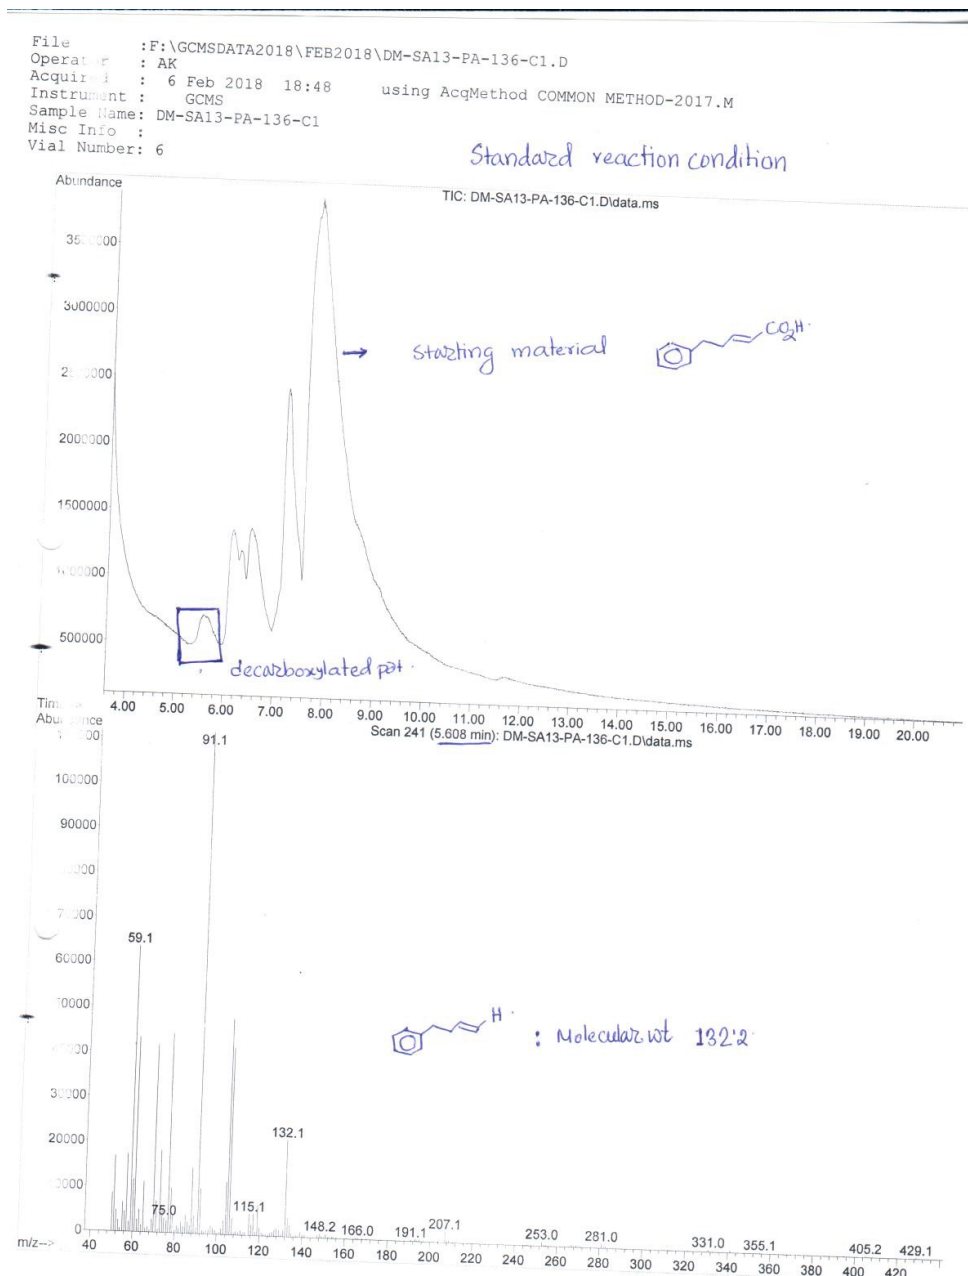

**Condition 2:** In a clean, oven-dried screw cap reaction tube containing magnetic stir-bar, 5-phenyl-2-pentenoic acid (0.05 mmol), palladium acetate (10 mol%, 0.01 mmol), [Cu(neocuproine)<sub>2</sub>Cl] (20 mol%, 0.02 mmol) were weighed. Subsequently, 1 mL of *t*BuOH solvent was added in the reaction tube and it was placed in a heated oil bath (130 °C) for vigorous stirring (850 rpm). After 24 h, the reaction was cooled to room temperature and filtered through celite pad using minimum amount of ethyl acetate. After removing excess solvent, it was used directly for GC-MS analysis.

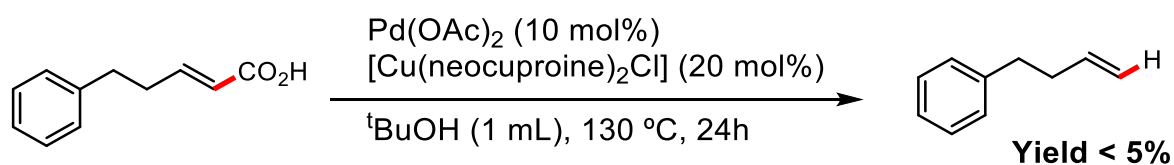

GC-MS spectra

File :F:\GCMSDATA2018\MAR 2018\SA13-PA-146-E1.D  
 Operator : SRD  
 Acquired : 22 Mar 2018 19:33 using AcqMethod COMMON METHOD-2017.M  
 Instrument : GCMS  
 Sample Name: SA13-PA-146-E1  
 Misc Info :  
 Vial Number: 1

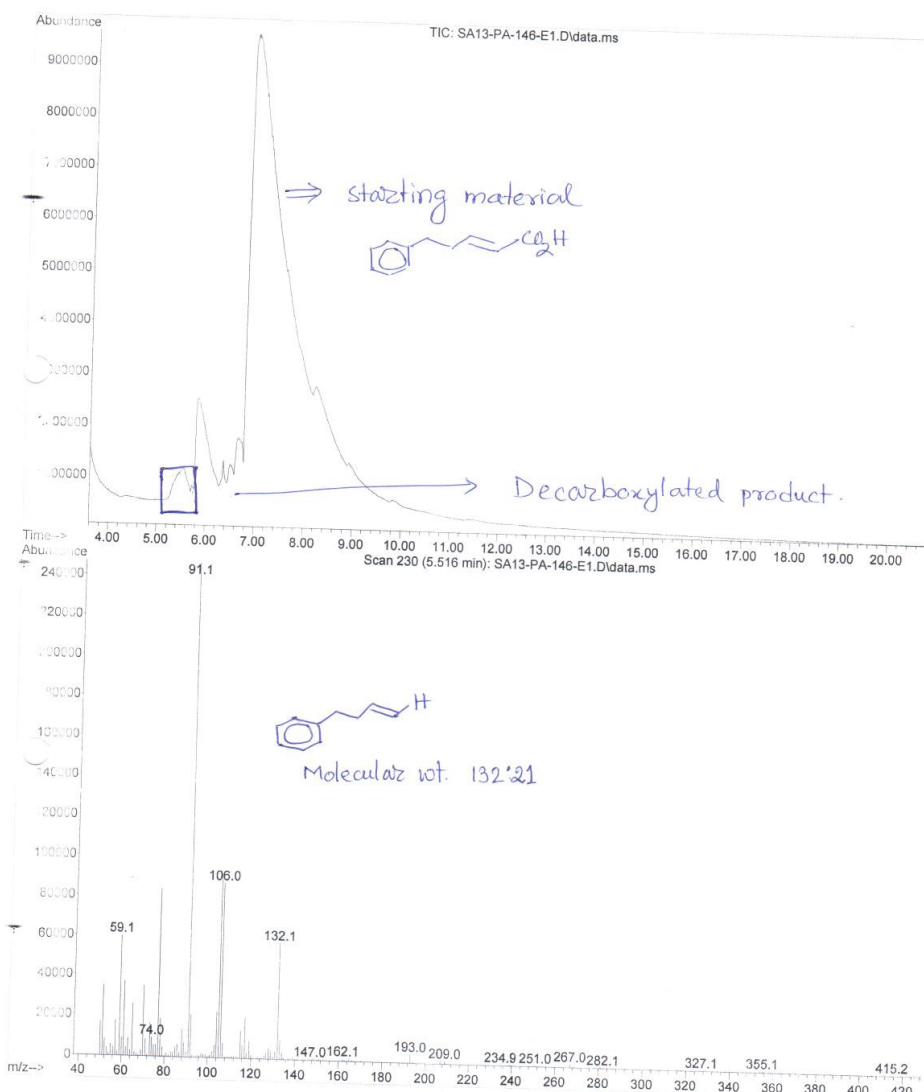

### Role of Copper salts in the reaction:

Reaction without Cu(II)-salts: In a clean, oven-dried screw cap reaction tube containing magnetic stir-bar, phenyl acetamide of 8-amino quinoline (0.1 mmol), palladium acetate (10 mol%, 0.01 mmol), neocuproine (20 mol%, 0.02 mmol) were weighed. Then, 2-octenoic acid (2 equiv, 0.2 mmol) was transferred through micro pipette. Solvent was introduced in the reaction medium by common laboratory syringe. Then the tube was placed in a preheated oil bath at 130 °C and the reaction were stirred (at 850 rpm) vigorously for 24 h. After detaching the reaction, it was cooled to room temperature and filtered through celite pad using ethyl acetate (5 mL). Excess solvent was removed in rotatory evaporator and the reaction mixture was directly used for GC analysis.

Reaction with Cu(I)-salt: In an oven-dried screw cap reaction tube containing magnetic stir-bar, phenyl acetamide of 8-amino quinoline (0.1 mmol), palladium

acetate (10 mol%, 0.01 mmol), neocuproine (20 mol%, 0.02 mmol), CuI (2 equiv, 0.2 mmol) were weighed. Then, 2-octenoic acid (2 equiv, 0.2 mmol) was transferred through micro pipette. Solvent was introduced in the reaction medium by common laboratory syringe. Then the tube was placed in a preheated oil bath at 130 °C and the reaction were stirred (at 850 rpm) vigorously for 24 h. After detaching the reaction, it was cooled to room temperature and filtered through celite pad using minimum amount of ethyl acetate (30 mL). Excess solvent was removed in rotatory evaporator and the reaction mixture was directly used for GC analysis.

### Feasibility of olefination reaction with terminal and internal olefin:

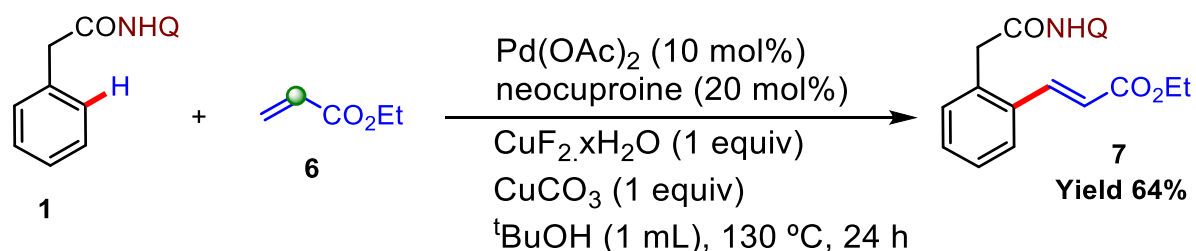

Above experiment was performed following the general procedure described in section 2.2. Yield of the olefinated product was 64%. Characterization data for the isolated compound was matched with the literature reported data.<sup>4</sup>

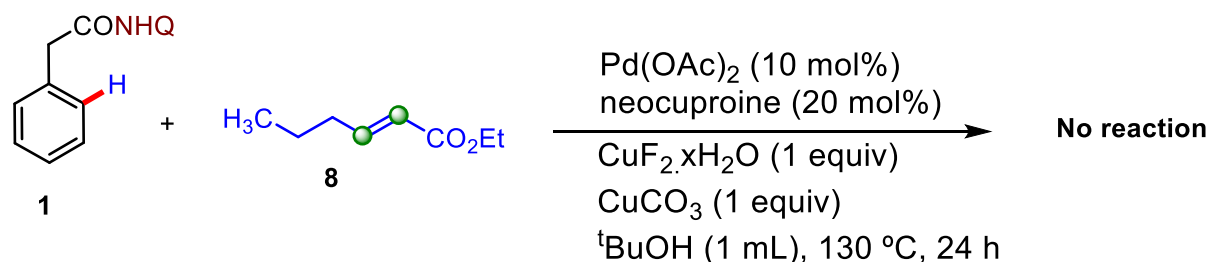

Above experiment was performed following the general procedure described in section 2.2. Reaction mixture was analyzed by proton NMR and GC-MS.

### Radical quenching experiments with TEMPO

In a clean, oven-dried screw cap reaction tube containing magnetic stir-bar, phenyl acetic acid derivative **1a** (0.1 mmol), Pd(OAc)<sub>2</sub> (10 mol%, 0.01 mmol), neocuproine (20 mol%, 0.02 mmol), copper (II) carbonate basic (1 equiv, 0.1 mmol), copper (II) fluoride (1 equiv, 0.1 mmol) and TEMPO (0.15 mmol) were weighed. 2 equiv of *trans*-2-octenoic acid (0.2 mmol) was transferred through micro pipette. Common laboratory syringe was used to introduce *t*-BuOH (2 mL) into the reaction mixture. Then the tube was placed in a preheated oil bath at 130 °C and the reaction was stirred (at 1000 rpm) vigorously for 24 h. Upon completion of the reaction, it was cooled to room temperature and filtered through celite pad using ethyl acetate (30 mL). Solvent was removed under reduced pressure. Then the reaction mixture was extracted with EtOAc (10 mL x 3) and saturated NaHCO<sub>3</sub>. The combined organic layer was dried over anhydrous Na<sub>2</sub>SO<sub>4</sub>. Then the solvent was evaporated under reduced pressure. The crude product was then purified by column chromatography through silica gel (100-200 mesh size) using PET-

ether / ethyl acetate as eluent to afford olefinated product **3d** in 31% yield.

## 2.5. Computational Details:

All calculations were performed using Gaussian 16 suite of the quantum chemical program.<sup>5</sup> Geometry optimizations were performed at the density functional theory (DFT) level employing  $\omega$ B97xD functional in conjunction with 6-31G(d) basis set for the main group elements (H, C, N, O) and Lanl2DZ basis set and associated pseudopotential for Pd and Cu. Analytical frequency calculations were performed on the optimized geometries to verify the local minima with no imaginary frequency and first-order saddle points with one imaginary frequency. For the transition state structures, intrinsic reaction coordinate (IRC) calculations were performed to confirm whether the located transition state connects the appropriate minima. More accurate energy calculations were performed employing M06L functional, for which the main group elements (H, C, N, O) were described using 6-311++G(d,p) basis set and Pd and Cu were described with Stuttgart/Dresden SDD basis set and associated pseudopotential. Single point energy calculations were performed accounting implicit solvation effect with *tert*-butanol solvent invoked through the conductor-like polarizable continuum model (CPCM). The M06L functional has been reported to give good agreement with experiment for the Pd-catalyzed reactions.<sup>6</sup>

### ***Terminal vs. Internal Olefin***

The ester analogues can undergo 1,2-migratory insertion followed by  $\beta$ -hydride elimination and reductive elimination to form linear olefination products. Our computational results with ethyl 2-propenoate, a *terminal* olefin substrate, show that the 1,2-migratory insertion step is rate-determining with a free energy barrier of  $\Delta G^\ddagger = 18.5$  kcal/mol (Figure S14). The overall reaction possesses a substantial net thermodynamic driving force of  $\Delta G_{\text{rxn}} = -10.2$  kcal/mol (**B**→**I6**). On the other hand, a negligible net driving force ( $\Delta G_{\text{rxn}} = -0.9$  kcal/mol) is observed for ethyl 2-hexenoate, an *internal* olefin substrate (Figure S15). We reason that electron-donating alkyl ( $-\text{CH}_3\text{CH}_2\text{CH}_2$ ) substitution in the olefinic moiety for *internal* esters weaken the  $\text{Pd}^0$ -olefin coordination in the final reductive elimination process, making the overall process thermodynamically unfavorable. Additionally, an energy decomposition analysis (EDA, Figure S16) for the 1,2-migratory insertion step shows that the olefin distortion ( $E_{\text{dist(olefin)}}$ ) is the governing energy-component that dictates the differential reactivity between the terminal and internal olefin. The internal olefin has to undergo greater distortion compared to the terminal one, which makes it inert toward the olefination process. This explains why no product was obtained from the *internal* ester substrate.

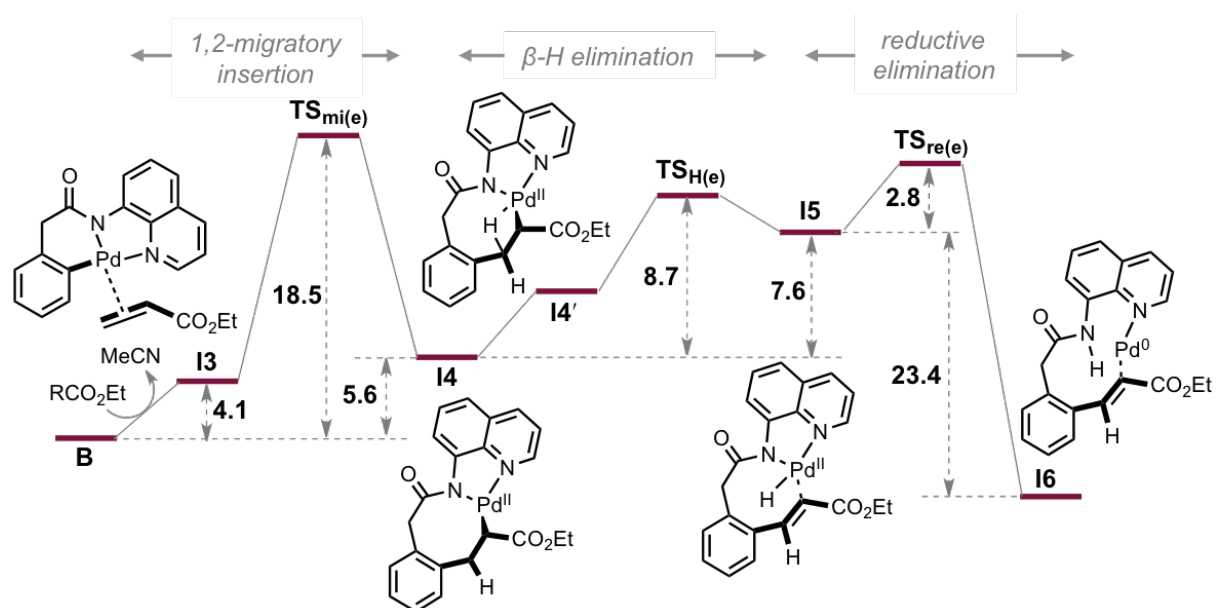

**Figure S11.** Gibbs Free energy profile ( $\Delta\Delta G$  values in kcal/mol) for the formation for linear olefinated product using a *terminal* olefin.

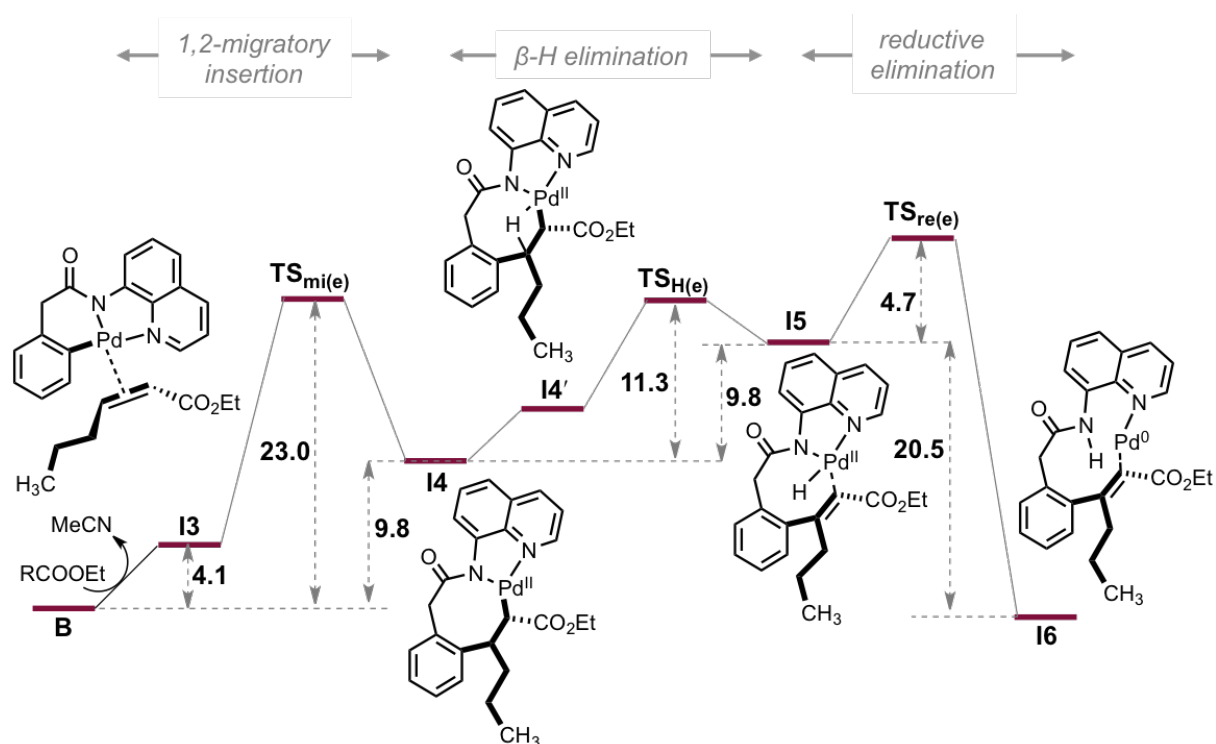

**Figure S12.** Gibbs Free energy profile ( $\Delta\Delta G$  values in kcal/mol) for the formation for linear olefinated product using an *internal* olefin.

### 1,2-migratory insertion step

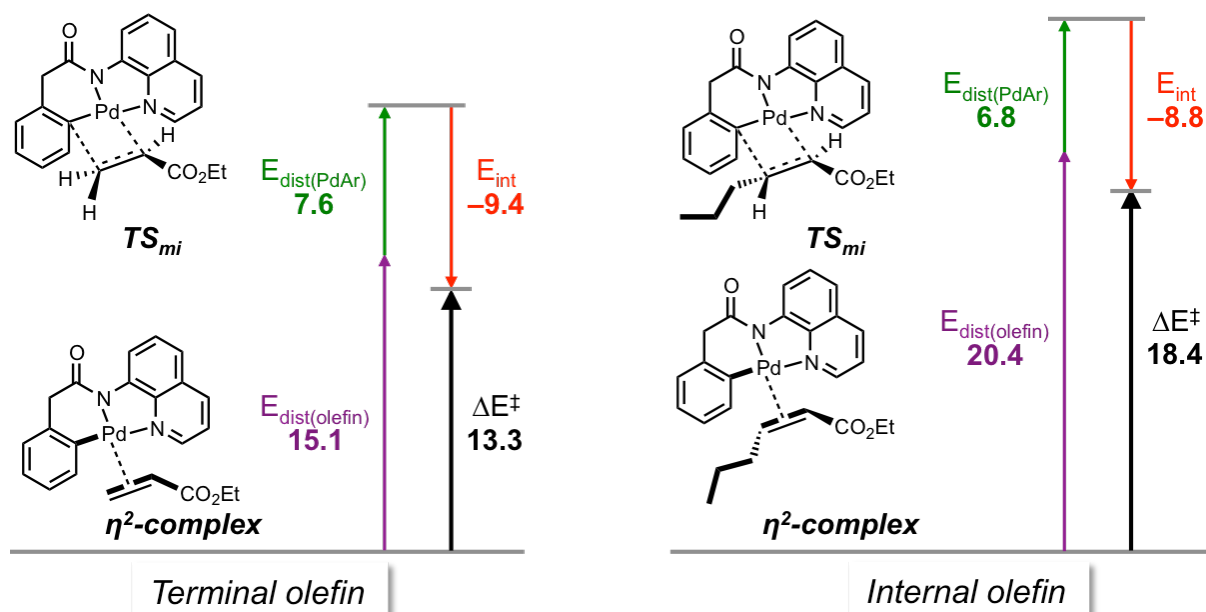

**Figure S13.** Distortion-interaction analysis on the 1,2 migratory insertion step for the terminal and internal olefin.

### Promotional Effect of Cu-Complex on the 1,2-migratory insertion step

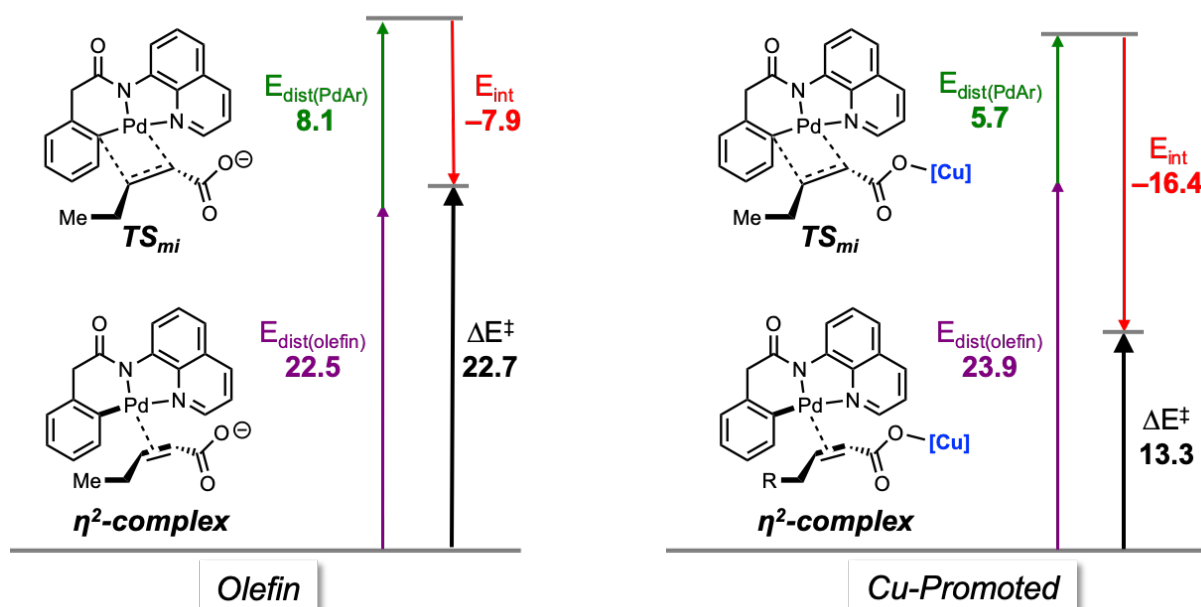

**Figure S14.** Distortion-interaction analysis on the 1,2 migratory insertion step for the unsaturated carboxylic acid to understand the promotional effect of  $Cu^I$ (neocuproine) complex.



## 2.6. X-ray crystallographic data

**Synthesis of C2:** To the stirring solution of Pd(OPiv)<sub>2</sub> (100 mg) in CH<sub>3</sub>CN+MeOH (1:1) mixture, amide derivatives in CH<sub>3</sub>CN (95 mg) was added dropwise. The reaction mixture was stirred at 60°C for 4 h. Orange red supernatant was filtered, dried and further recrystallised from CH<sub>3</sub>CN to afford the desired complex (yield: 82%).

**Synthesis of C3:** To the solution of Pd(OAc)<sub>2</sub> (75 mg) in CH<sub>3</sub>CN, amide derivative (97 mg) in CH<sub>3</sub>CN was added dropwise with stirring. Reaction mixture was heated at 60°C for 30 min followed by addition of an equivalent of pyridine. After 4 h, the yellow supernatant was cooled to room temperature, filtered, dried and further recrystallized from CH<sub>3</sub>CN to afford the desired complex (yield 92%).

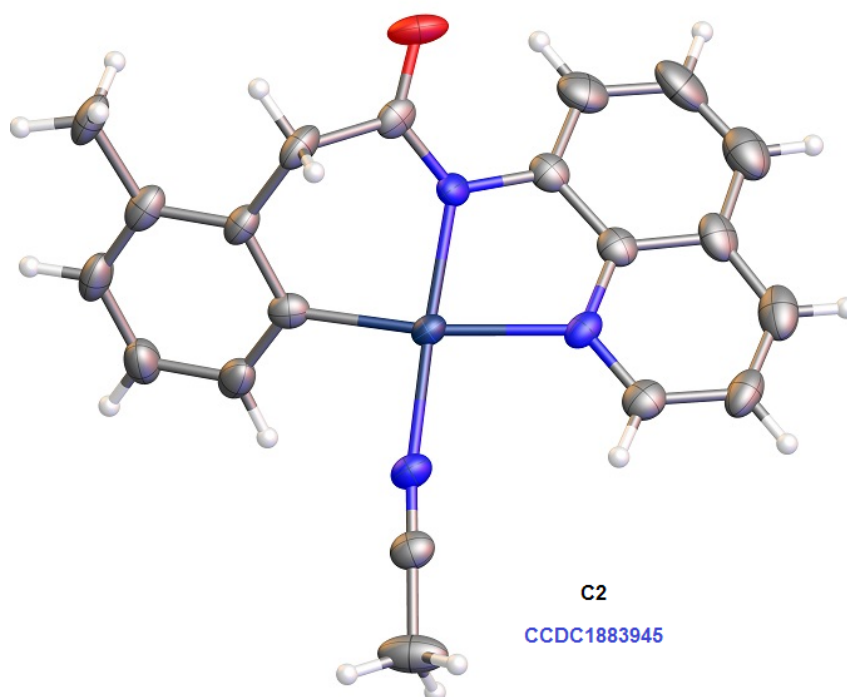

**Figure S15.** X-ray structure of **C2**

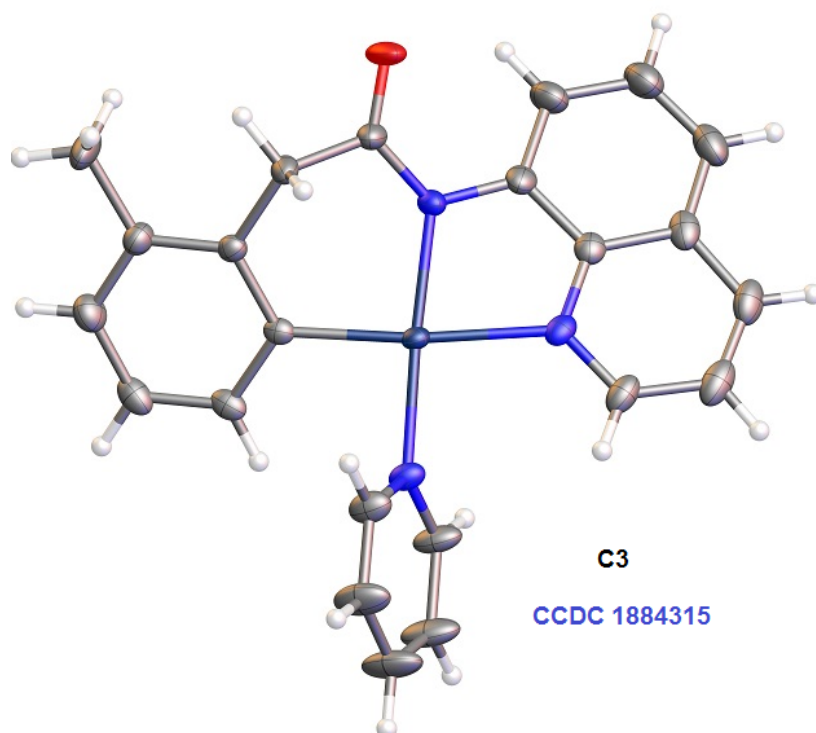

**Figure S16. X-ray structure of C3**

**Crystal Data of C2 (CCDC 1883945) and C3 (CCDC 1884315)**

|                                      |                                                    |                                                                          |
|--------------------------------------|----------------------------------------------------|--------------------------------------------------------------------------|
| Identification code                  | <b>C2</b>                                          | <b>C3</b>                                                                |
| Formula                              | C <sub>20</sub> H <sub>17</sub> N <sub>3</sub> OPd | C <sub>9.20</sub> N <sub>1.20</sub> O <sub>0.40</sub> Pd <sub>0.40</sub> |
| Formula weight(g/mol)                | 421.77                                             | 176.26                                                                   |
| Temperature/K                        | 150 K                                              | 150 K                                                                    |
| Crystal system                       | Hexagonal                                          | Triclinic                                                                |
| Space group                          | P 65                                               | P -1                                                                     |
| a/Å                                  | 22.1057(8)                                         | 9.6348(3)                                                                |
| b/Å                                  | 22.1057(8)                                         | 10.7198(3)                                                               |
| c/Å                                  | 6.7305(3)                                          | 11.5837(3)                                                               |
| α/°                                  | 90                                                 | 105.639(2)                                                               |
| β/°                                  | 90                                                 | 103.125(2)                                                               |
| γ/°                                  | 120                                                | 104.695(3)                                                               |
| Volume/Å <sup>3</sup>                | 2848.3(2)                                          | 1056.87(6)                                                               |
| Z                                    | 6                                                  | 5                                                                        |
| P <sub>calc</sub> /g/cm <sup>3</sup> | 1.475                                              | 1.385                                                                    |
| μ/mm <sup>-1</sup>                   | 0.988                                              | 0.892                                                                    |
| F(000)                               | 1272                                               | 426                                                                      |
| Crystal size/mm <sup>3</sup>         | 0.205 x 0.048 x 0.033                              | 0.118 x 0.094 x 0.09                                                     |
| Radiation                            | MoKα (λ = 0.71073)                                 | MoKα (λ = 0.71073)                                                       |
| 2θ range for data collection/°       | 2.82 to 24.99                                      | 2.93 to 25.00                                                            |

|                                                   |                                  |                                    |
|---------------------------------------------------|----------------------------------|------------------------------------|
| Index ranges                                      | -26<=h<=26, -26<=k<=26, -8<=l<=8 | -11<=h<=11, -12<=k<=12, -13<=l<=11 |
| Reflections collected / unique                    | 18452/ 3222 [R(int) = 0.0964]    | 8831/ 3701 [R(int) = 0.0630]       |
| Data / restraints / parameters                    | 3180 / 55 / 228                  | 3701/ 0/ 253                       |
| Goodness-of-fit on F <sup>2</sup>                 | 1.051                            | 1.224                              |
| Final R indices [I>2σ(I)]                         | R1 = 0.0425, wR2 = 0.0810        | R1 = 0.0426, wR2 = 0.1244          |
| R indices (all data)                              | R1 = 0.0526, wR2 = 0.0878        | R1 = 0.0505, wR2 = 0.1391          |
| Largest diff. peak and hole/<br>e Å <sup>-3</sup> | 0.550 and -0.346                 | 1.136 and -1.134                   |

## 2.7 References

- (1) Deb, A.; Bag, S.; Kancharla, R.; Maiti, D. Palladium-Catalyzed Aryl C–H Olefination with Unactivated, Aliphatic Alkenes. *J. Am. Chem. Soc.* **2014**, *136*, 13602-13605.
- (2) Deb, A.; Hazra, A.; Peng, Q.; Paton, R. S.; Maiti, D. Detailed Mechanistic Studies on Palladium-Catalyzed Selective C–H Olefination with Aliphatic Alkenes: A Significant Influence of Proton Shuttling. *J. Am. Chem. Soc.* **2017**, *139*, 763-775.
- (3) Pallenberg, A. J.; Koenig, K. S.; Barnhart, D. M. Synthesis and characterization of some copper (I) phenanthroline complexes. *Inorg. Chem.* **1995**, *34*, 2833-2840.
- (4) Hu, Q.; Liu, X.; Wang, G.; Wang, F.; Li, Q.; Zhang, W. Ag<sub>1</sub>Pd<sub>1</sub> Nanoparticles–Reduced Graphene Oxide as a Highly Efficient and Recyclable Catalyst for Direct Aryl C–H Olefination. *Chem. Eur. J.* **2017**, *23*, 17659 – 17662.
- (5) Frisch, M. J.; Trucks, G. W.; Schlegel, H. B.; Scuseria, G. E.; Robb, M. A.; Cheeseman, J. R.; Scalmani, G.; Barone, V.; Petersson, G. A.; Nakatsuji, H.; Li, X.; Caricato, M.; Marenich, A. V.; Bloino, J.; Janesko, B. G.; Gomperts, R.; Mennucci, B.; Hratchian, H. P.; Ortiz, J. V.; Izmaylov, A. F.; Sonnenberg, J. L.; Williams-Young, D.; Ding, F.; Lipparini, F.; Egidi, F.; Goings, J.; Peng, B.; Petrone, A.; Henderson, T.; Ranasinghe, D.; Zakrzewski, V. G.; Gao, J.; Rega, N.; Zheng, G.; Liang, W.; Hada, M.; Ehara, M.; Toyota, K.; Fukuda, R.; Hasegawa, J.; Ishida, M.; Nakajima, T.; Honda, Y.; Kitao, O.; Nakai, H.; Vreven, T.; Throssell, K.; Montgomery, J. A., Jr.; Peralta, J. E.; Ogliaro, F.; Bearpark, M. J.; Heyd, J. J.; Brothers, E. N.; Kudin, K. N.; Staroverov, V. N.; Keith, T. A.; Kobayashi, R.; Normand, J.; Raghavachari, K.; Rendell, A. P.; Burant, J. C.; Iyengar, S. S.; Tomasi, J.; Cossi, M.; Millam, J. M.; Klene, M.; Adamo, C.; Cammi, R.; Ochterski, J. W.; Martin, R. L.; Morokuma, K.; Farkas, O.; Foresman, J. B.; Fox, D. J. *Gaussian 16, Revision A.03*; Gaussian, Inc., Wallingford, CT, **2016**.
- (6) Sperger, T.; Sanhueza, I. A.; Kalvet, I.; Schoenebeck, F. Computational Studies of Synthetically Relevant Homogeneous Organometallic Catalysis Involving Ni, Pd, Ir, and Rh: An Overview of Commonly Employed DFT Methods and Mechanistic Insights. *Chem. Rev.* **2015**, *115*, 9532-9586.

## **NMR Spectra**

**(Starting materials and olefinated products)**

Starting material for entry 3i, 3j and 3s:

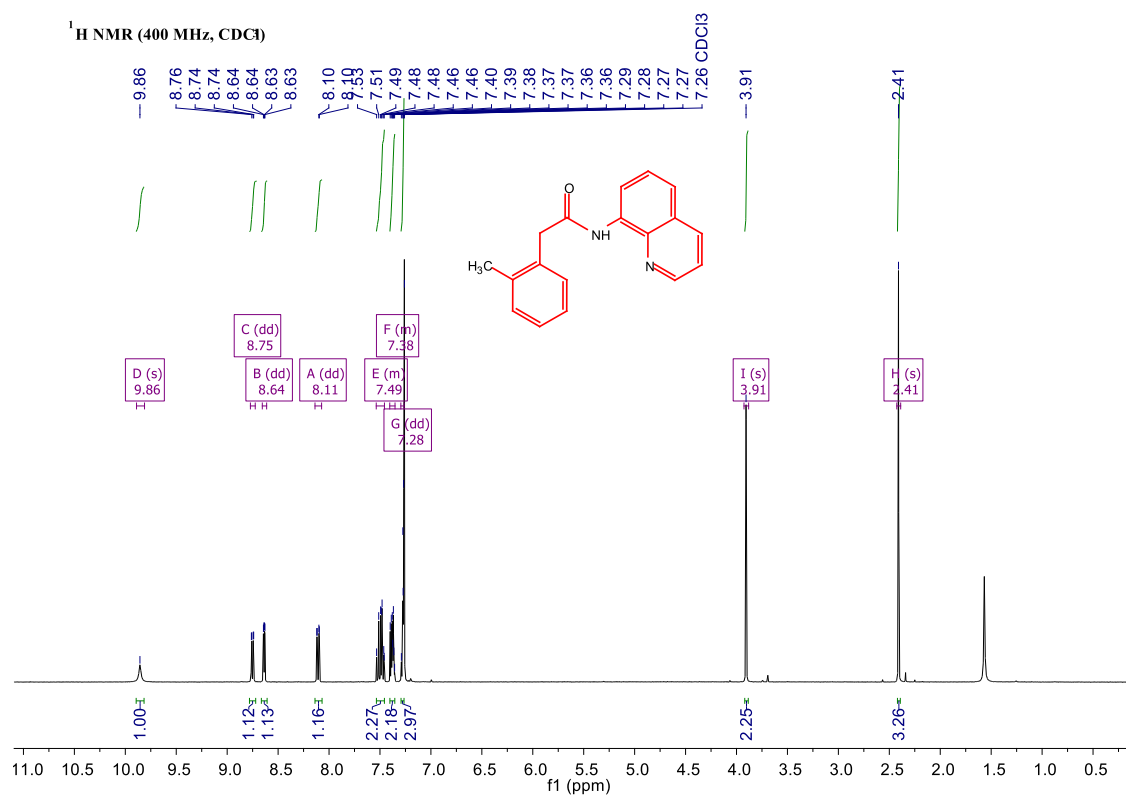

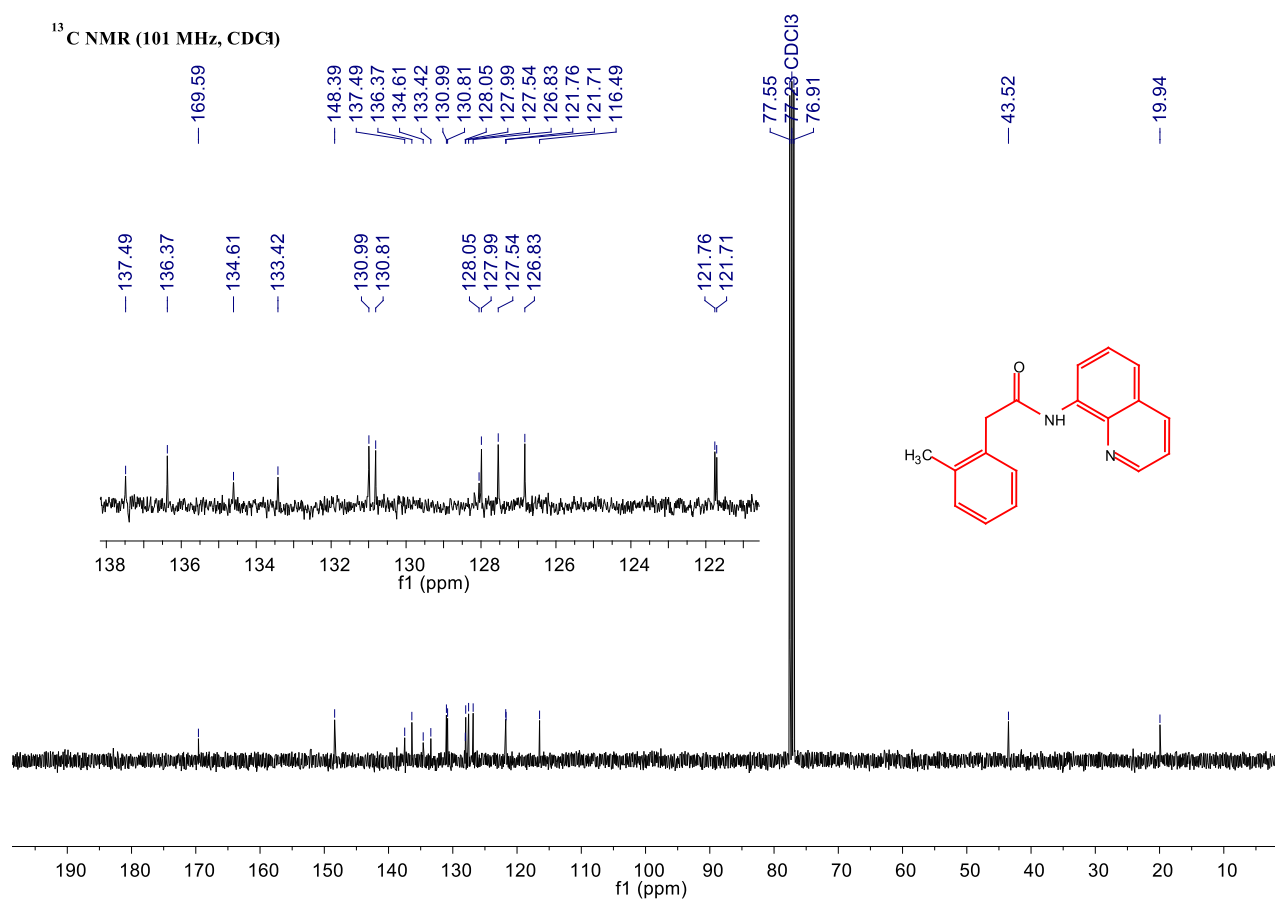

Starting material for entry 3ag and 3ah:

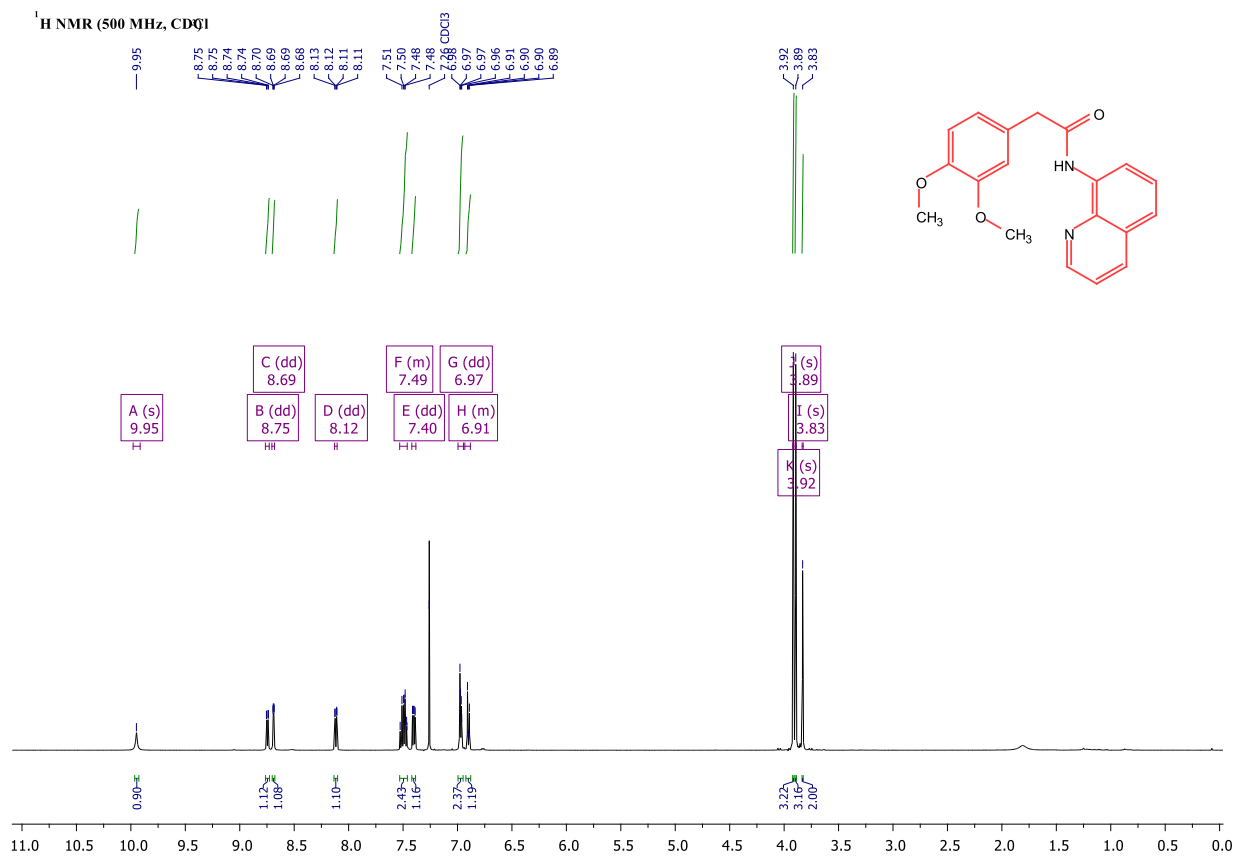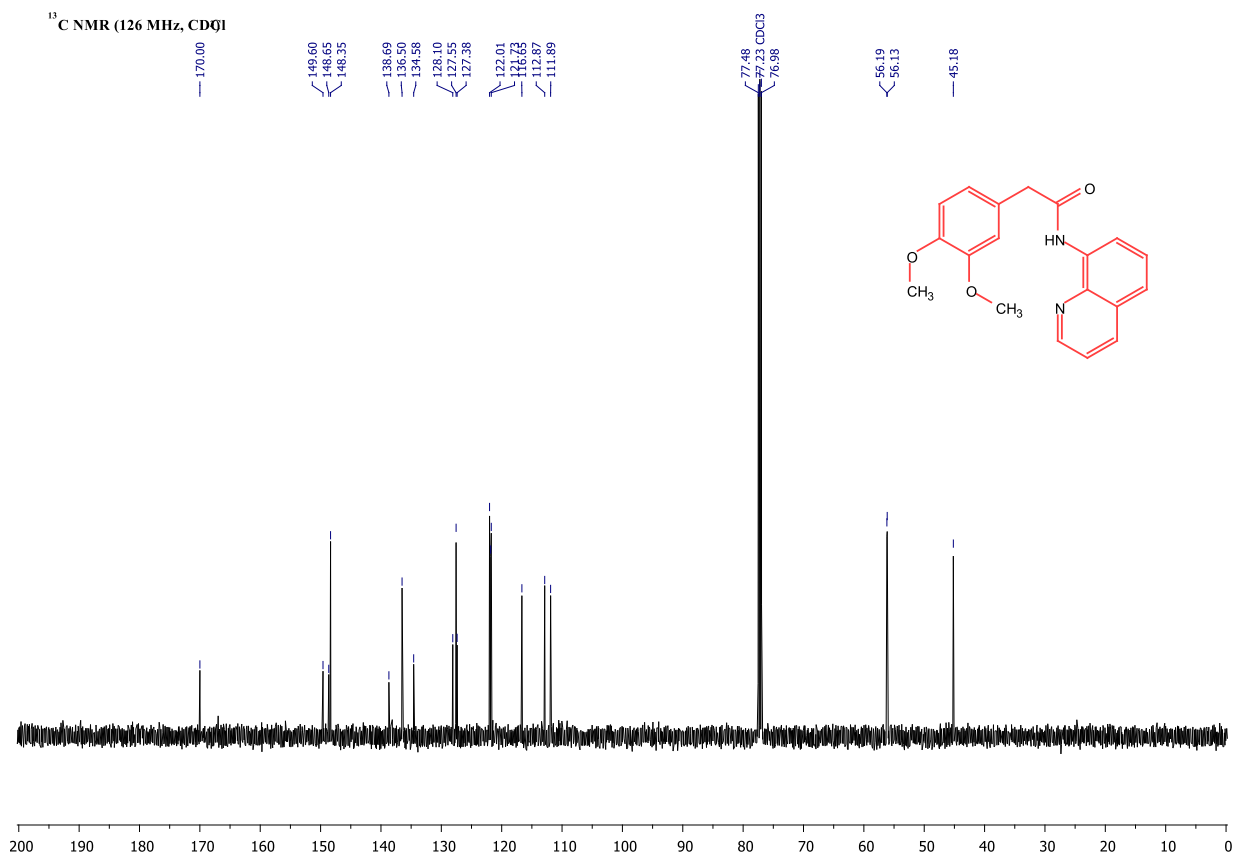

Starting material for entry 3w and 3aa:

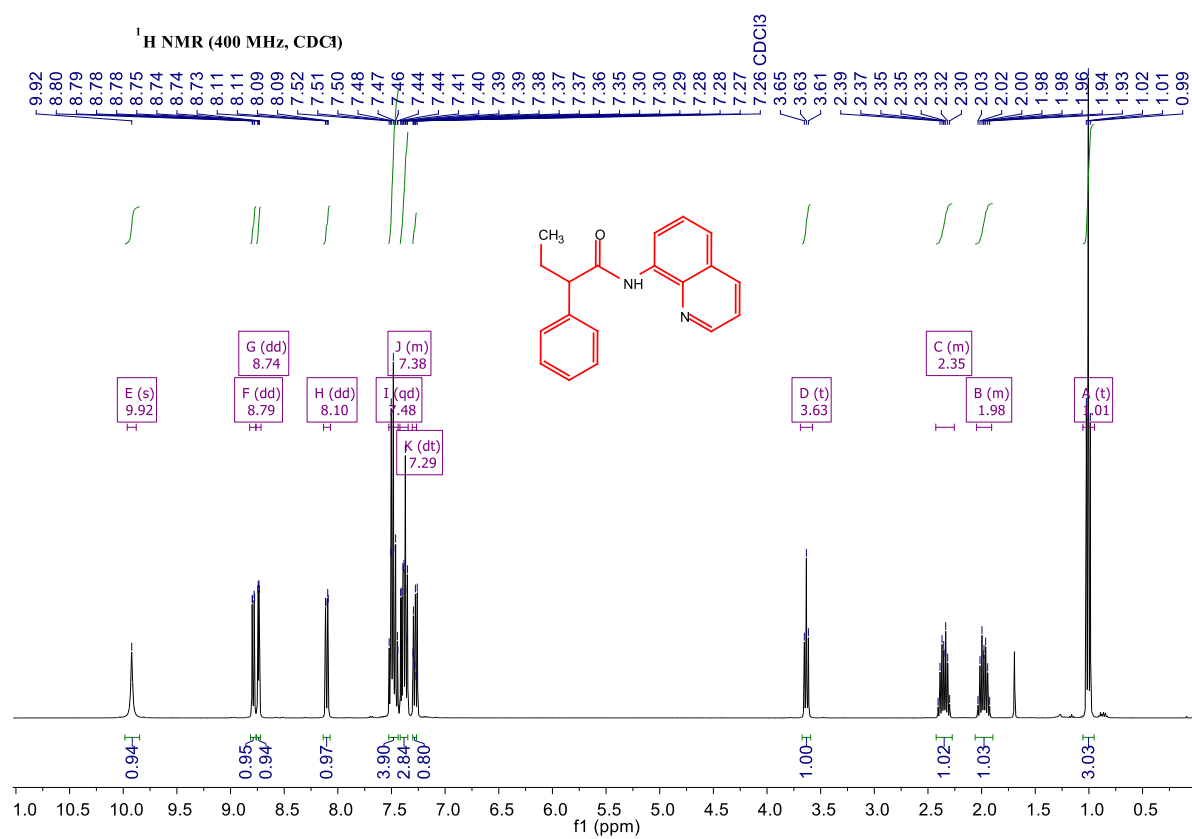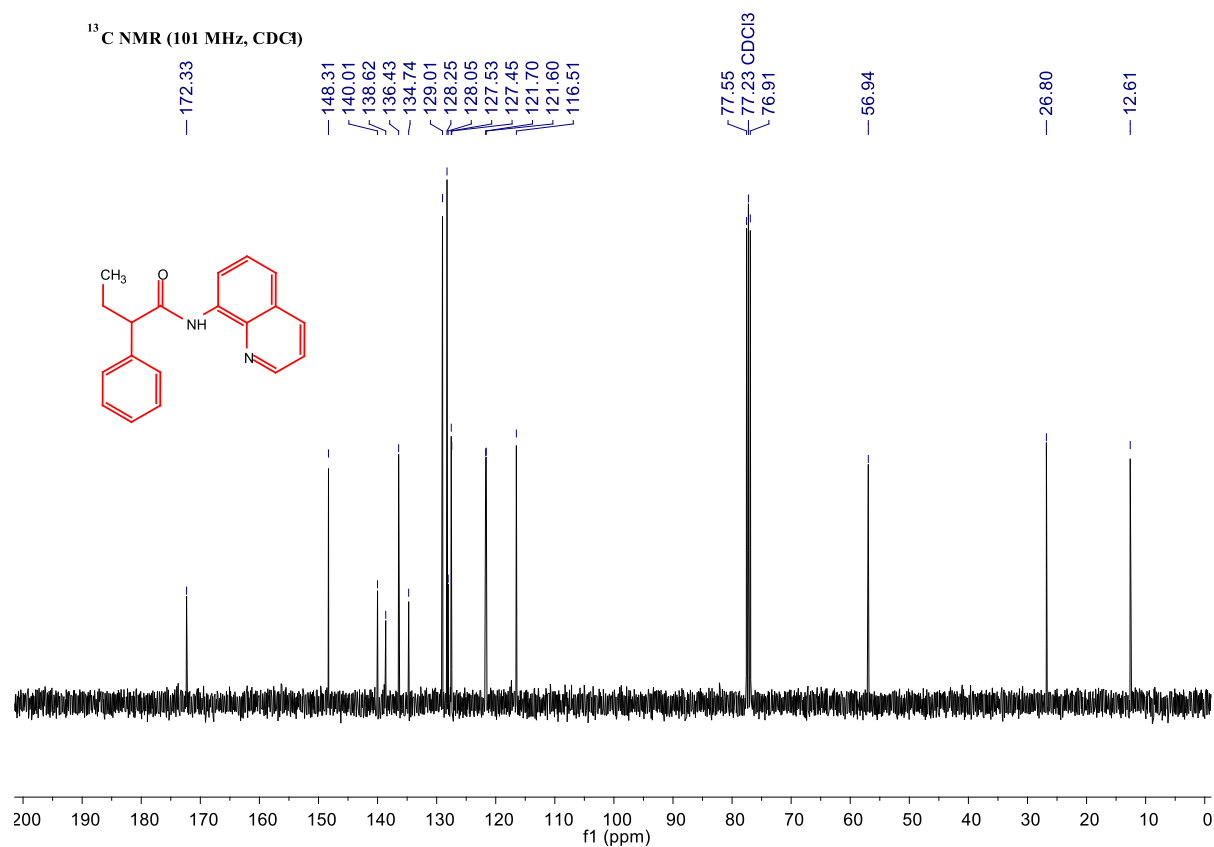

Starting material for entry 3m:



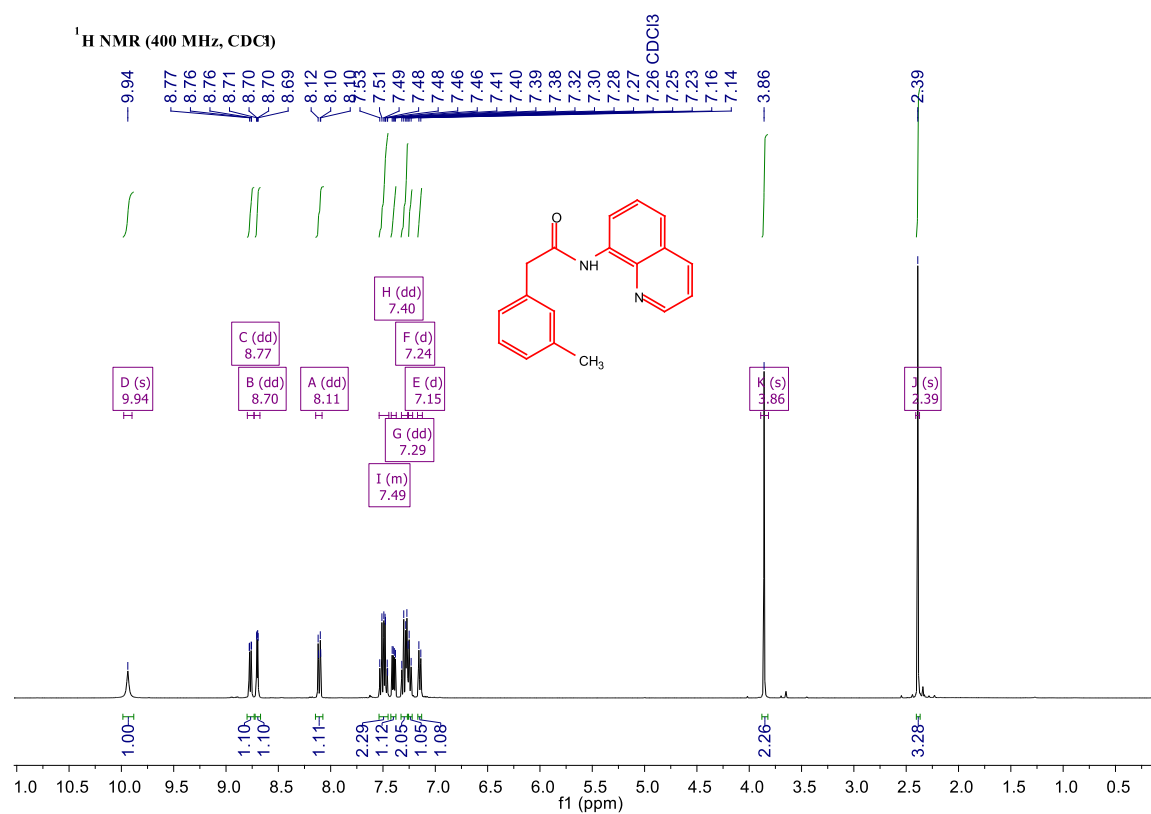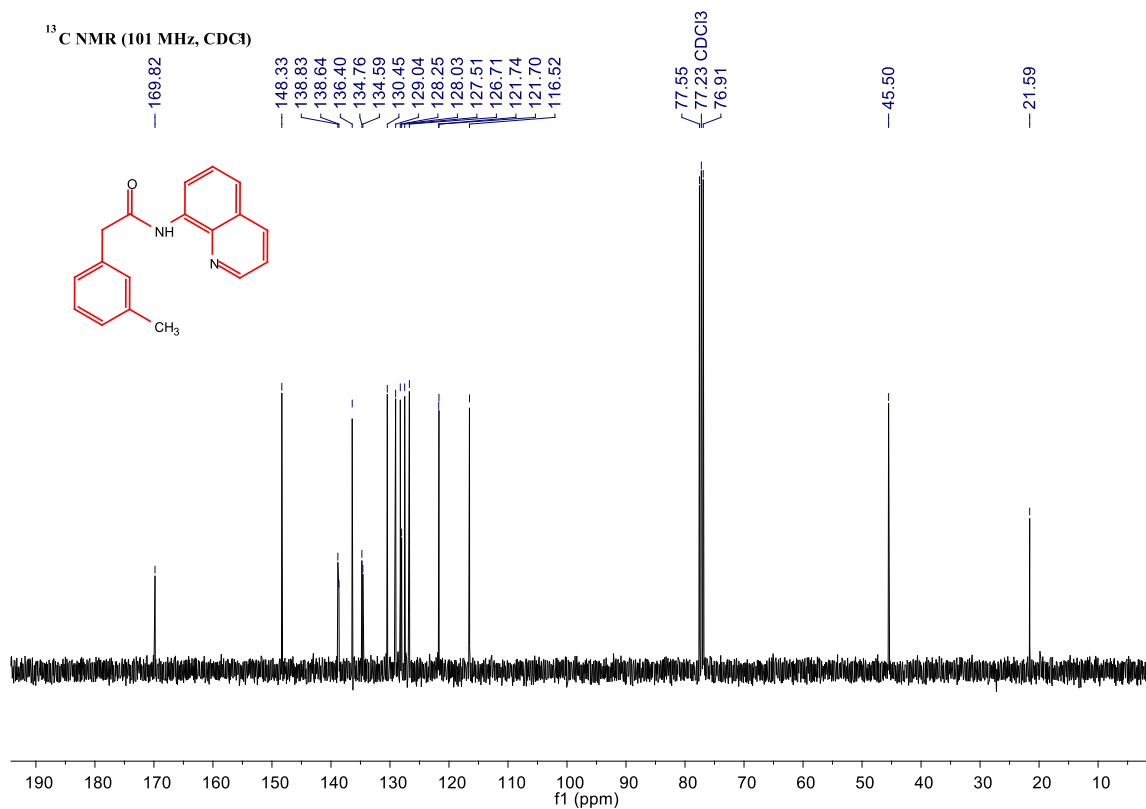

Starting material for entry 3q:

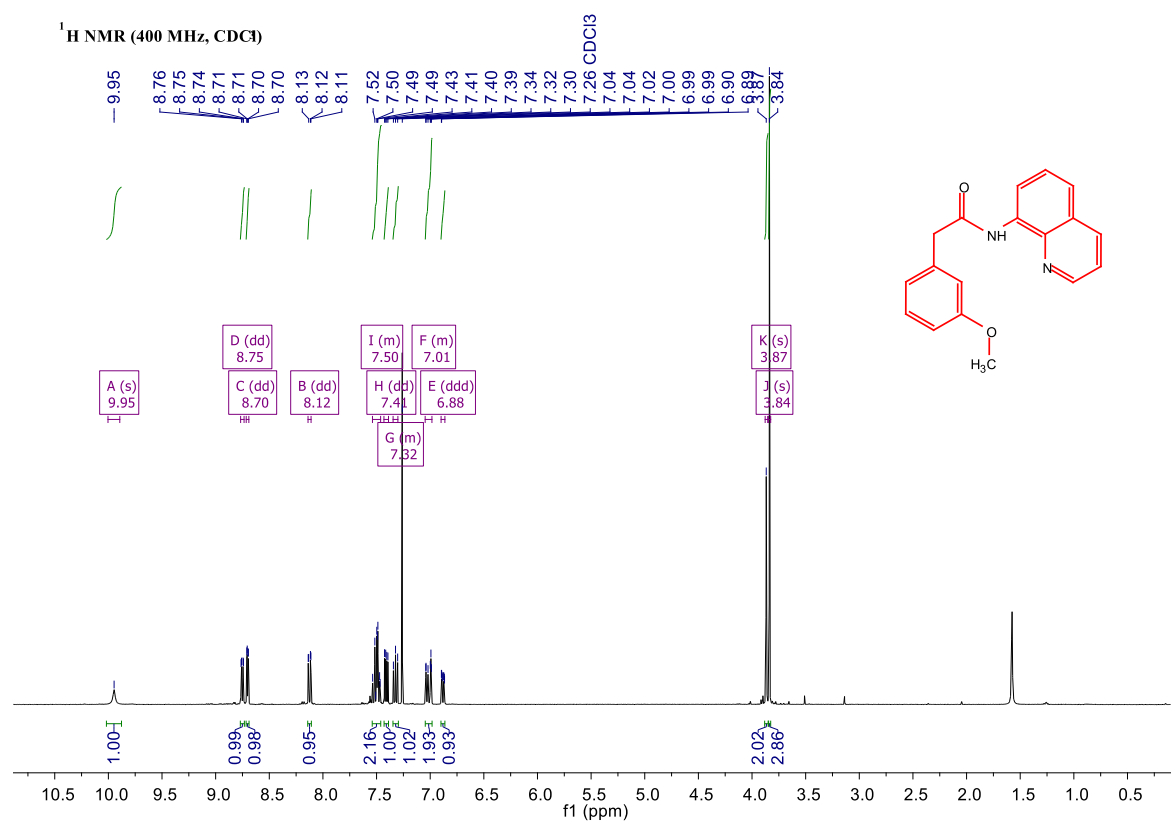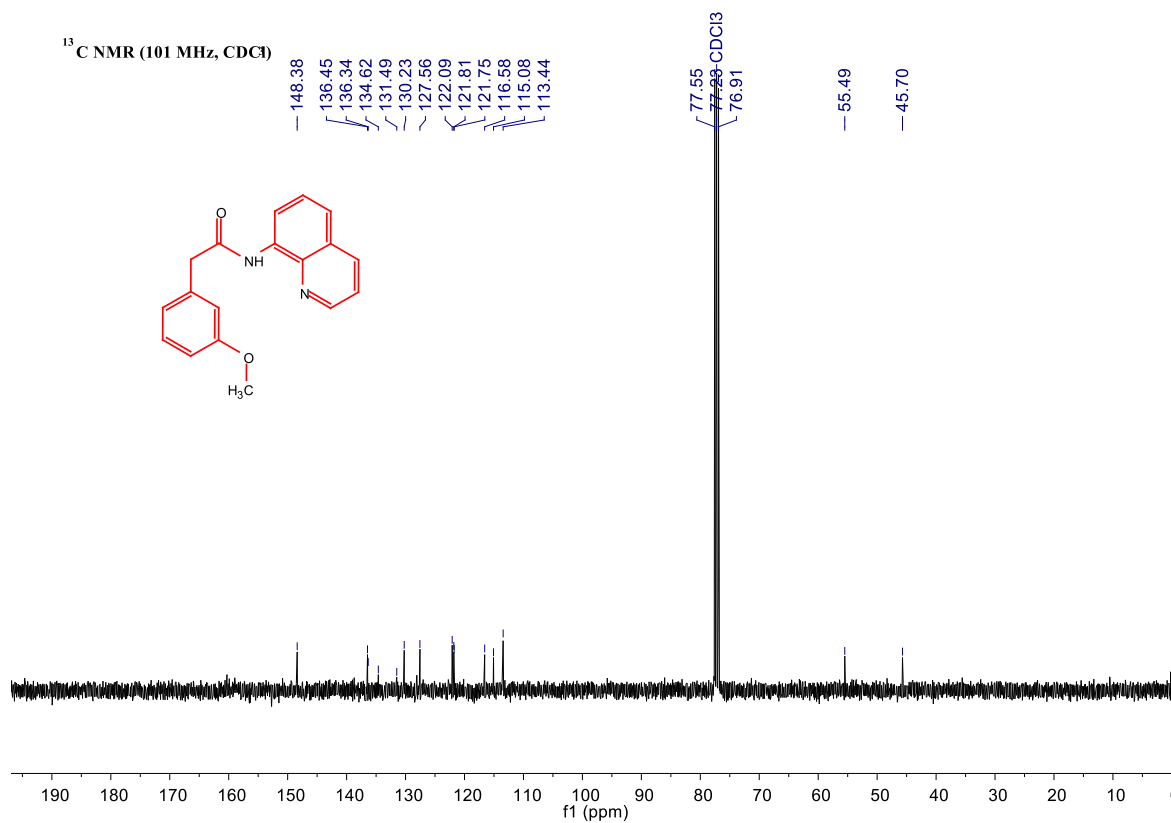

## Starting material for entry 3o and 3p:

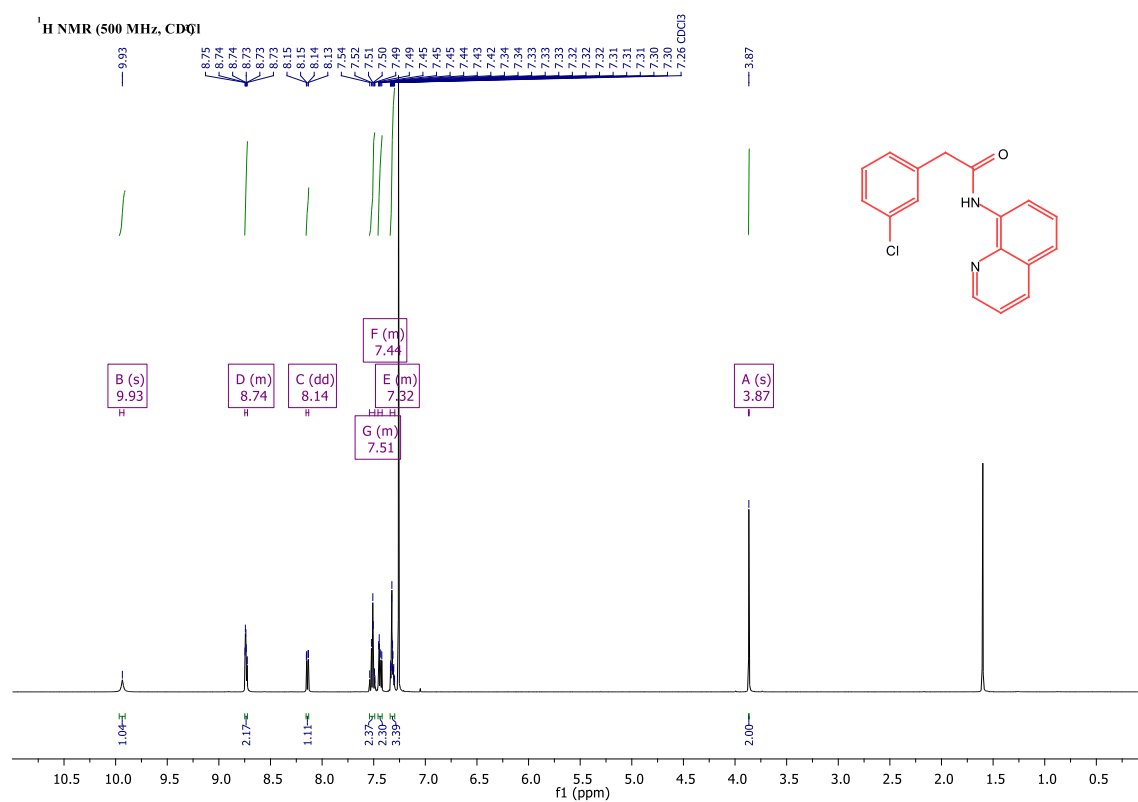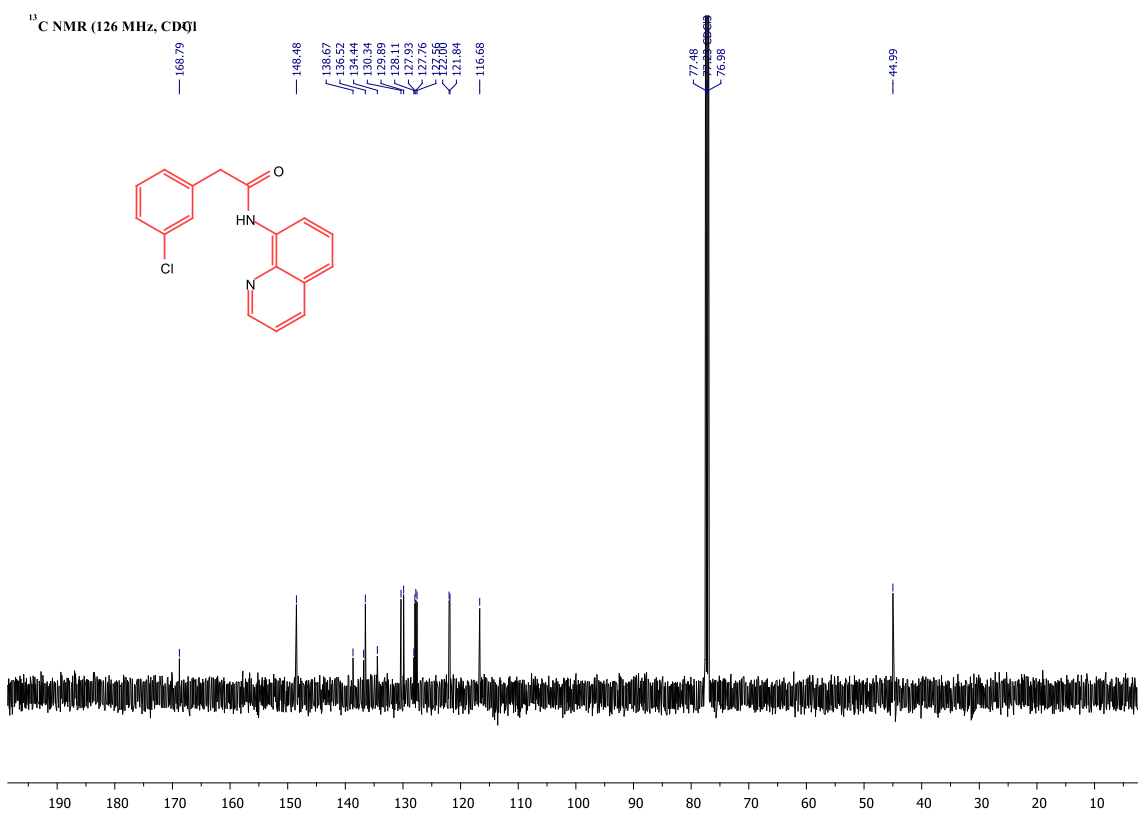

## Starting material for entry 3x:

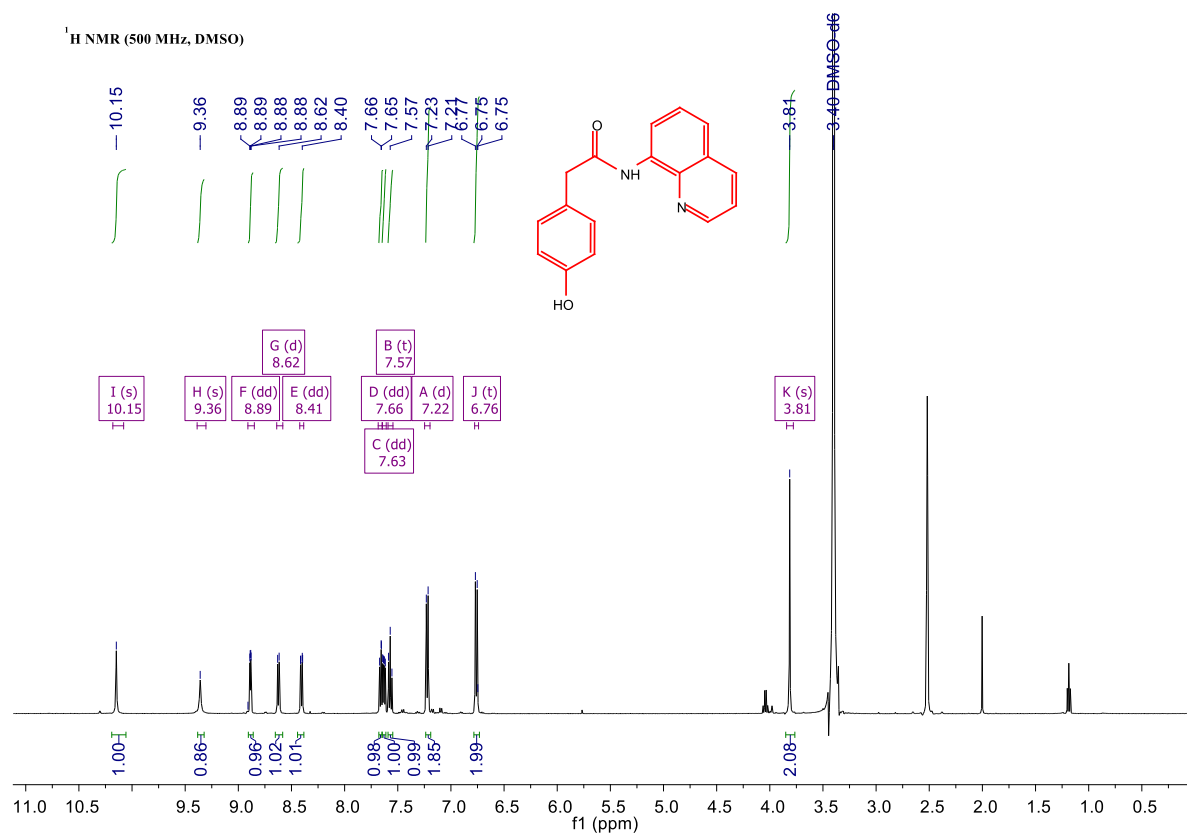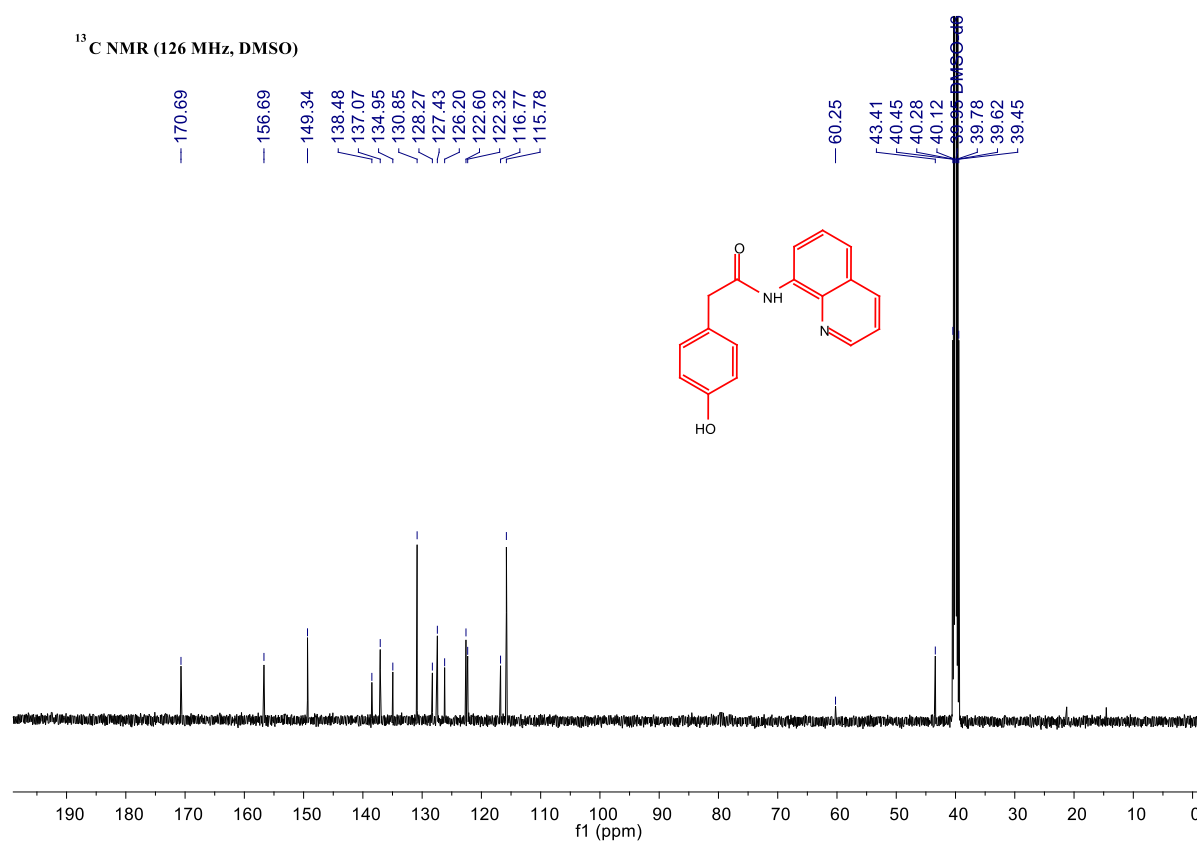

Starting material for entry 3ab:

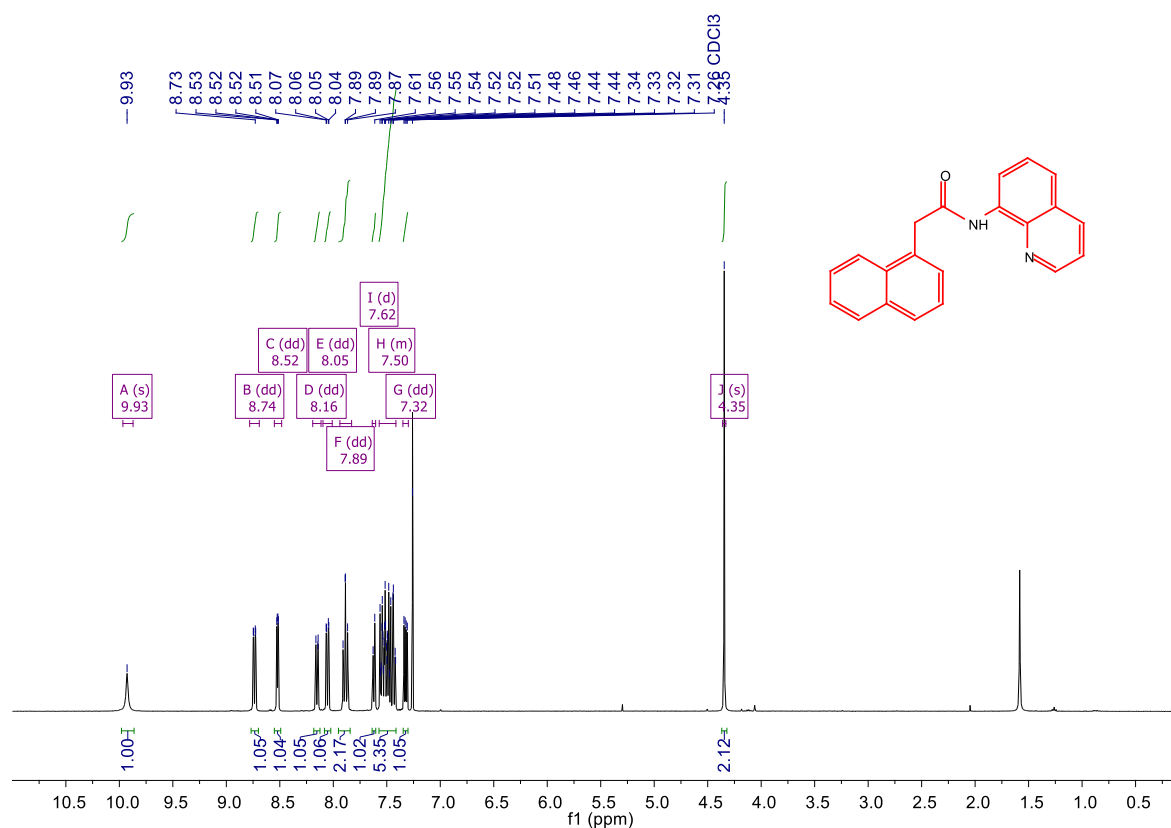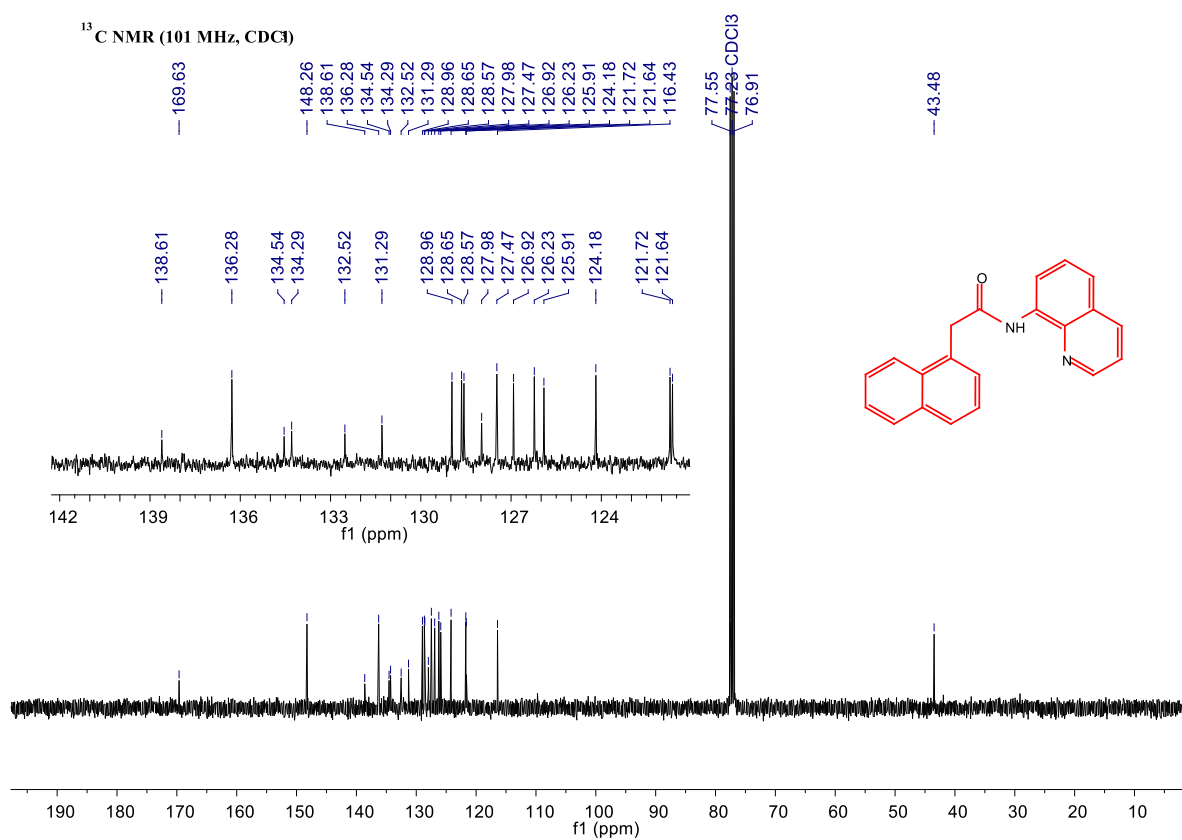

Starting material for entry 3ad:

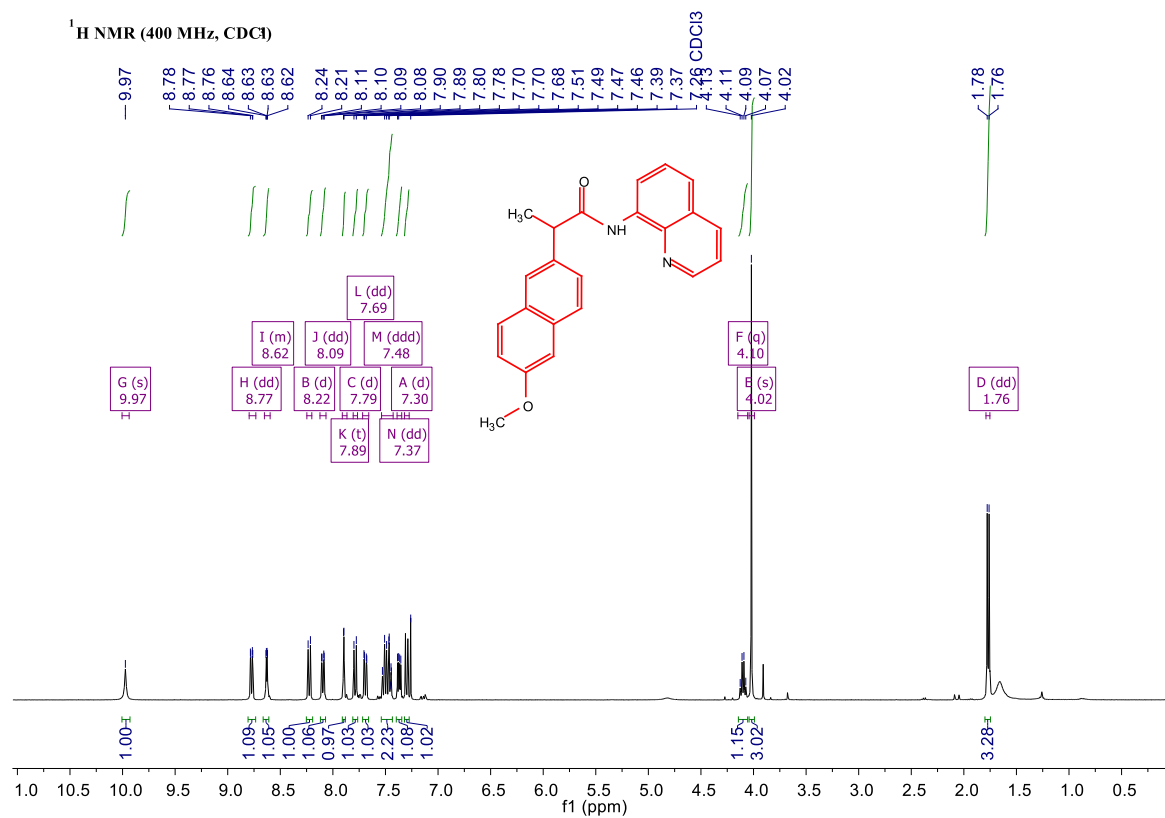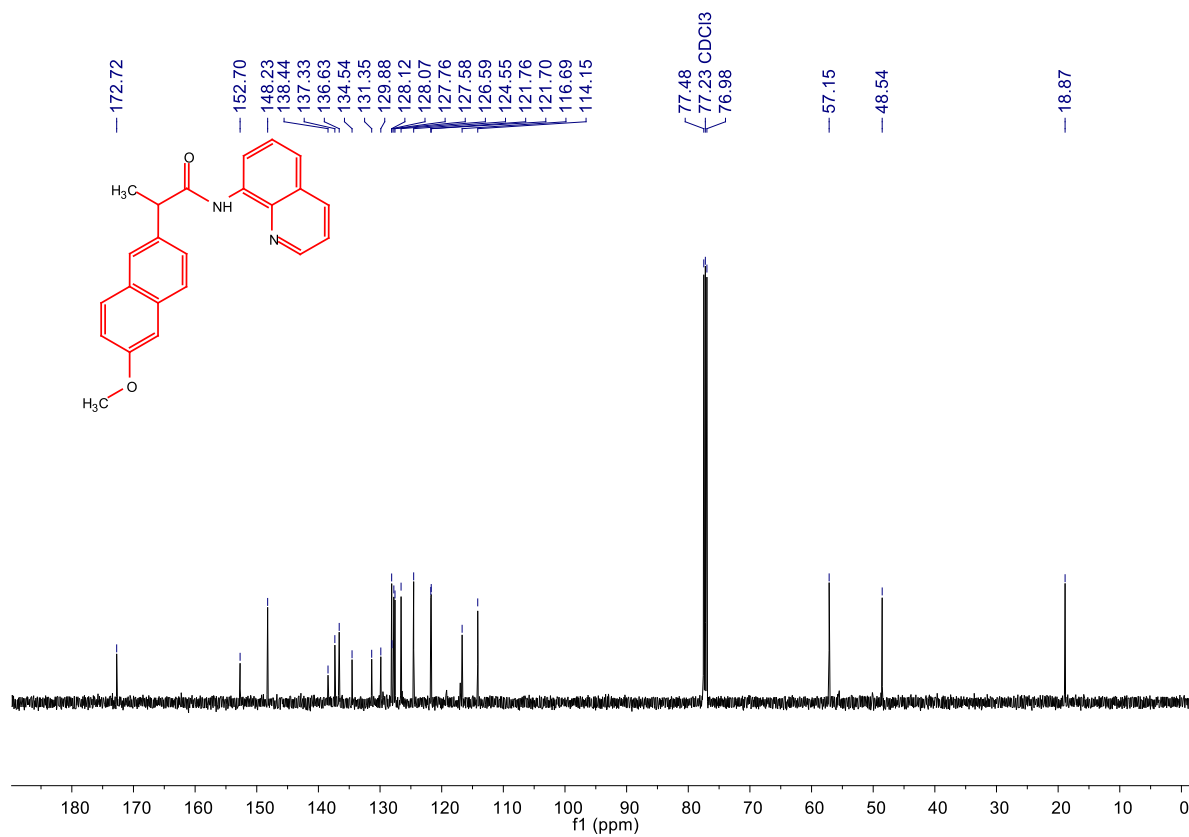

Starting material for entry 3ae

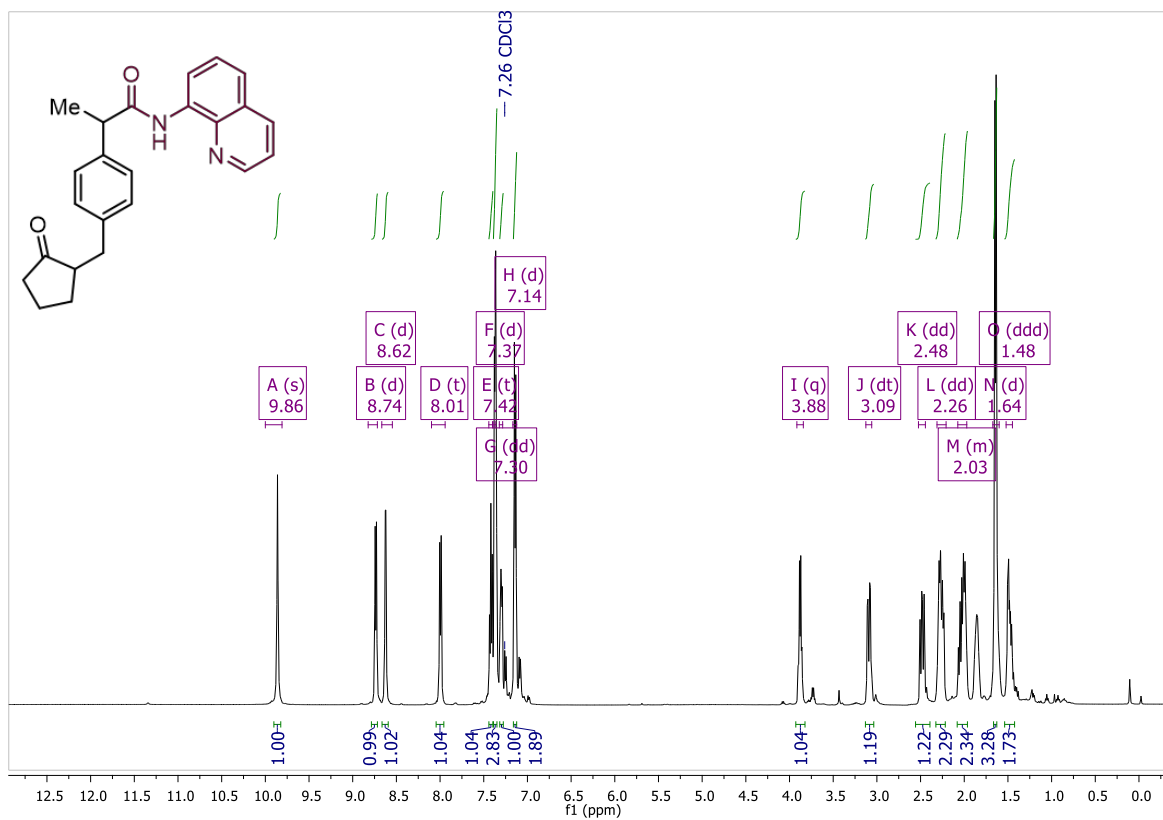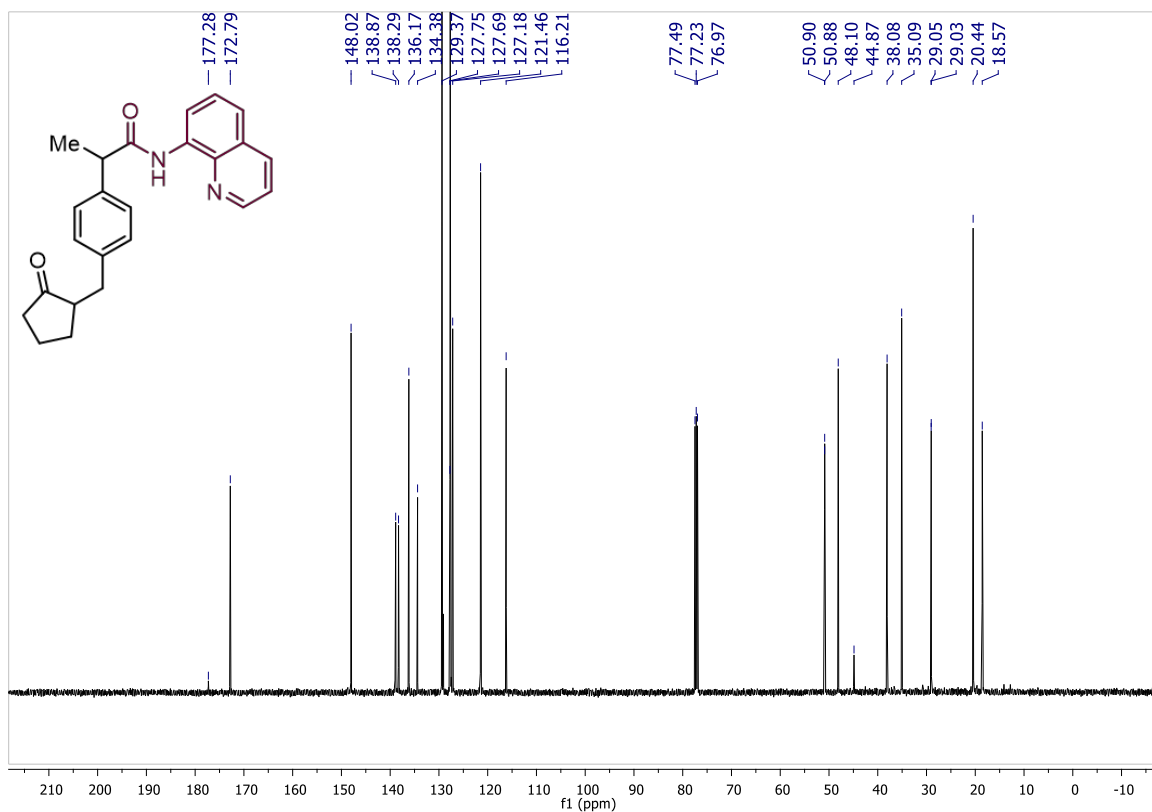

Starting materials for entry 3af

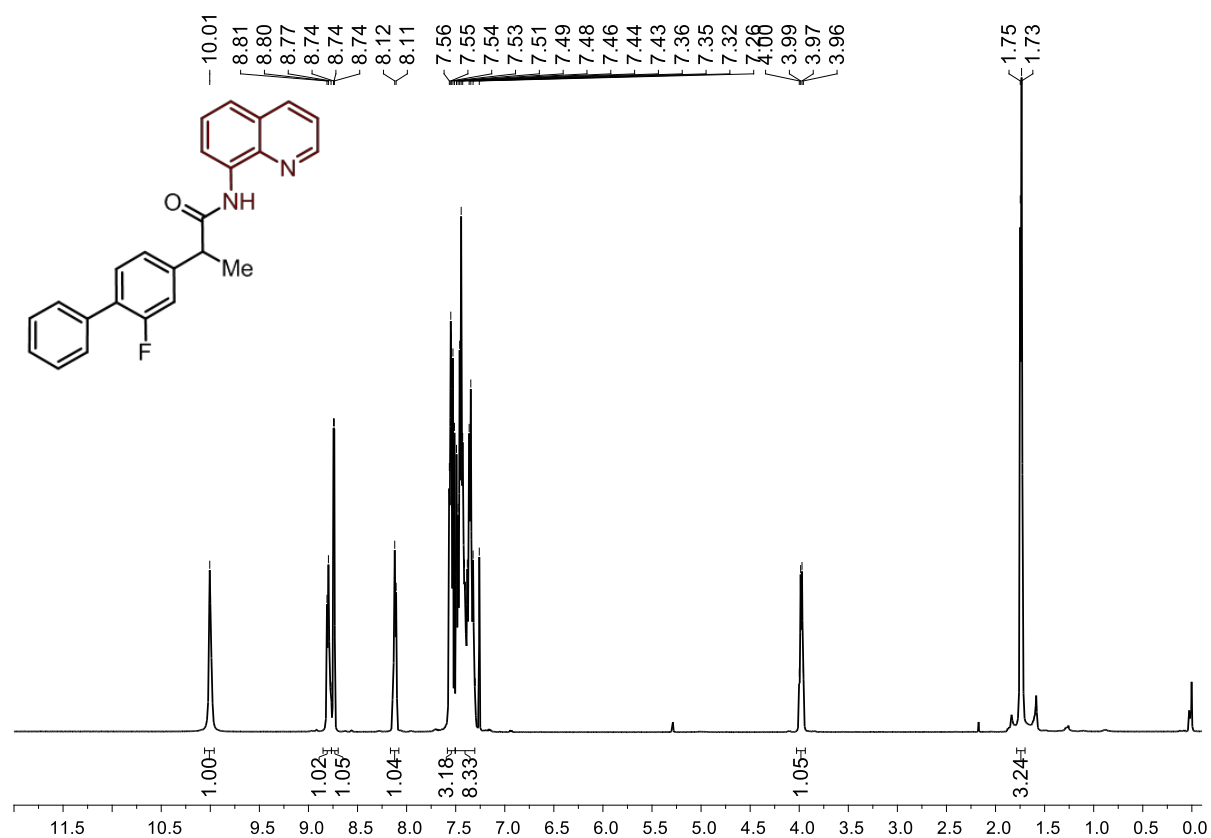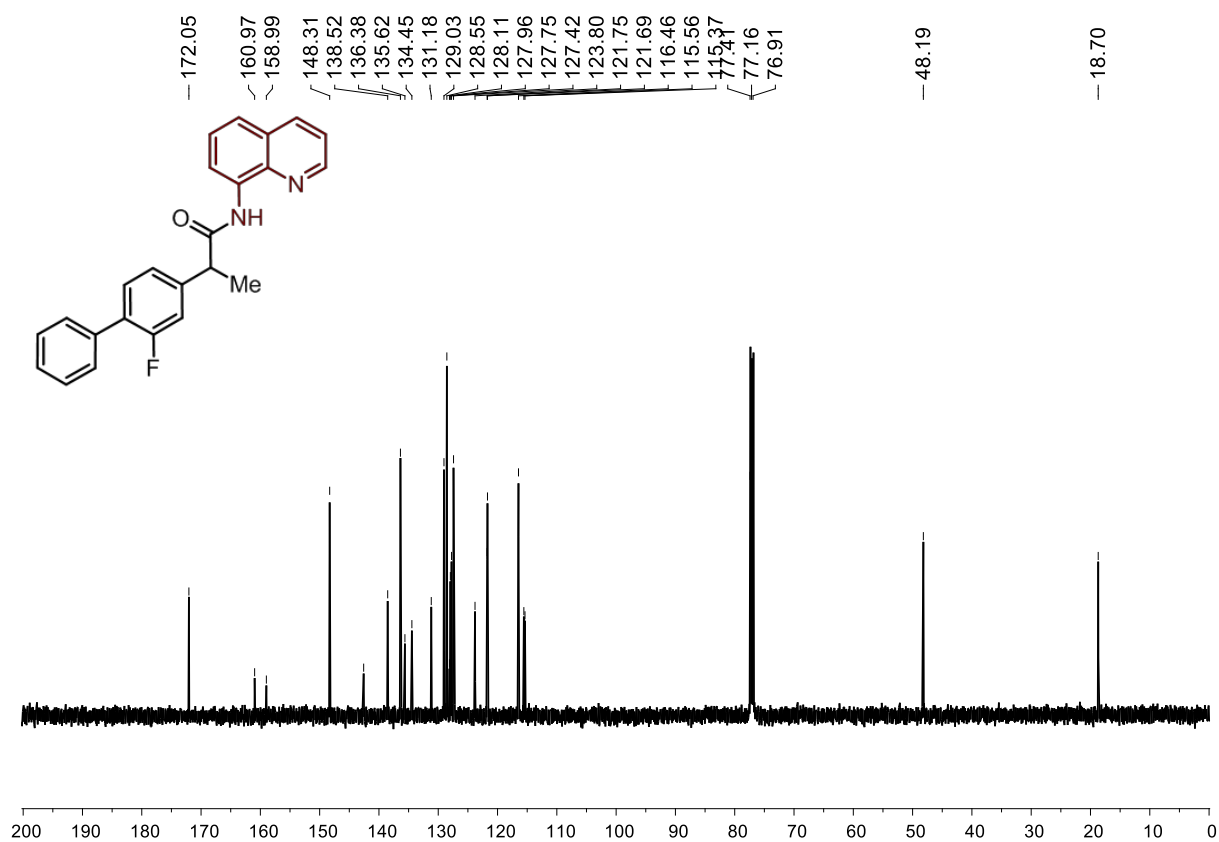

**Olefinated product: Scheme 2, entry 3a:**



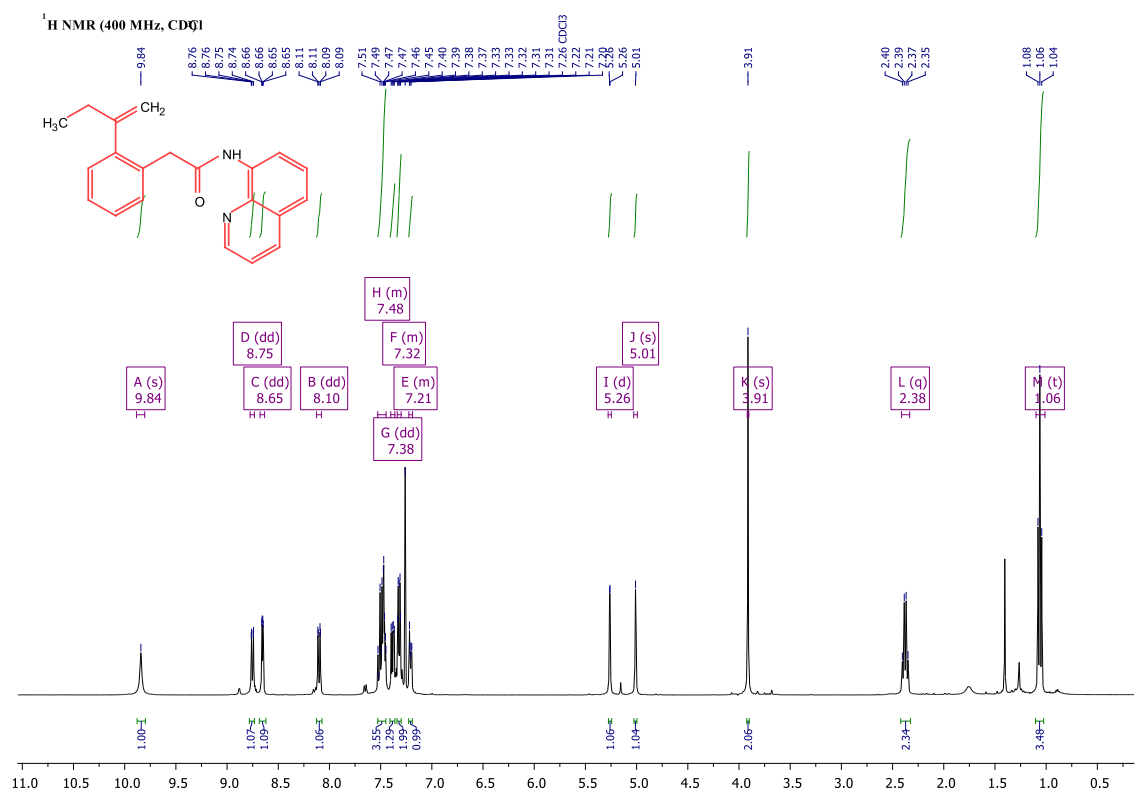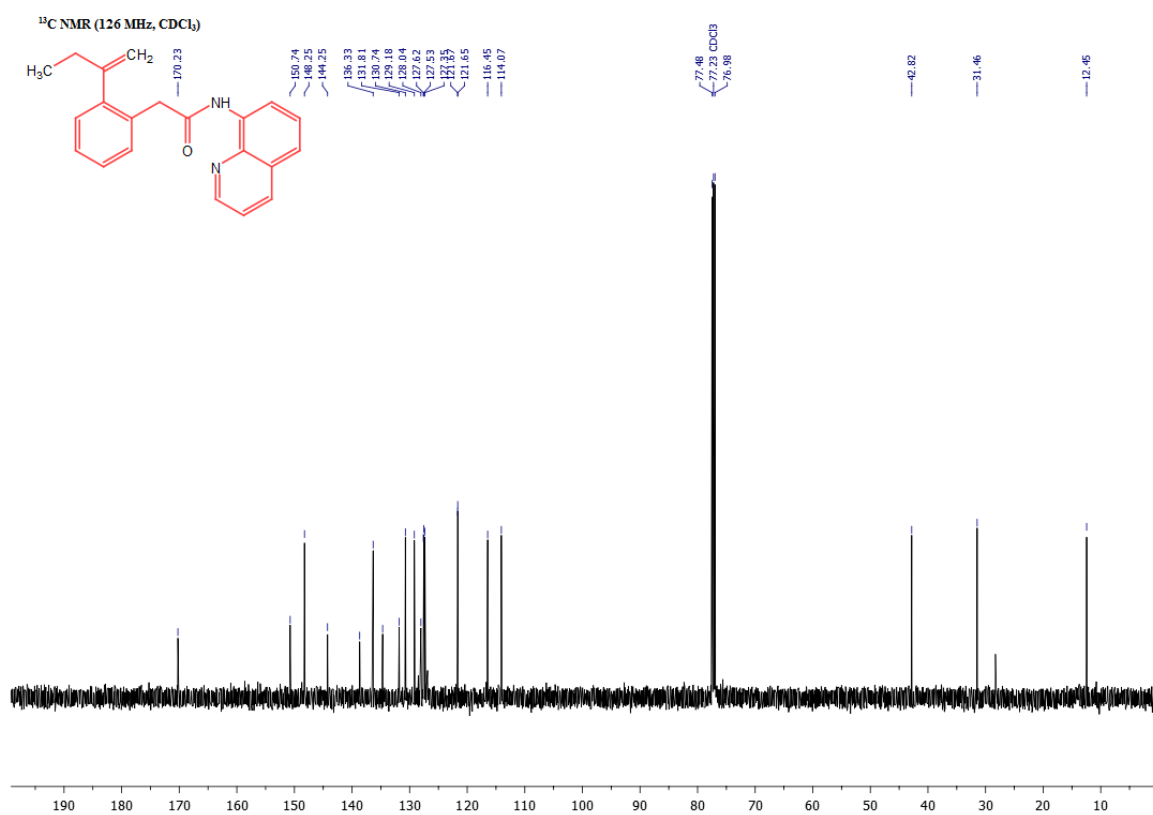

**Scheme 2, entry 3b:**

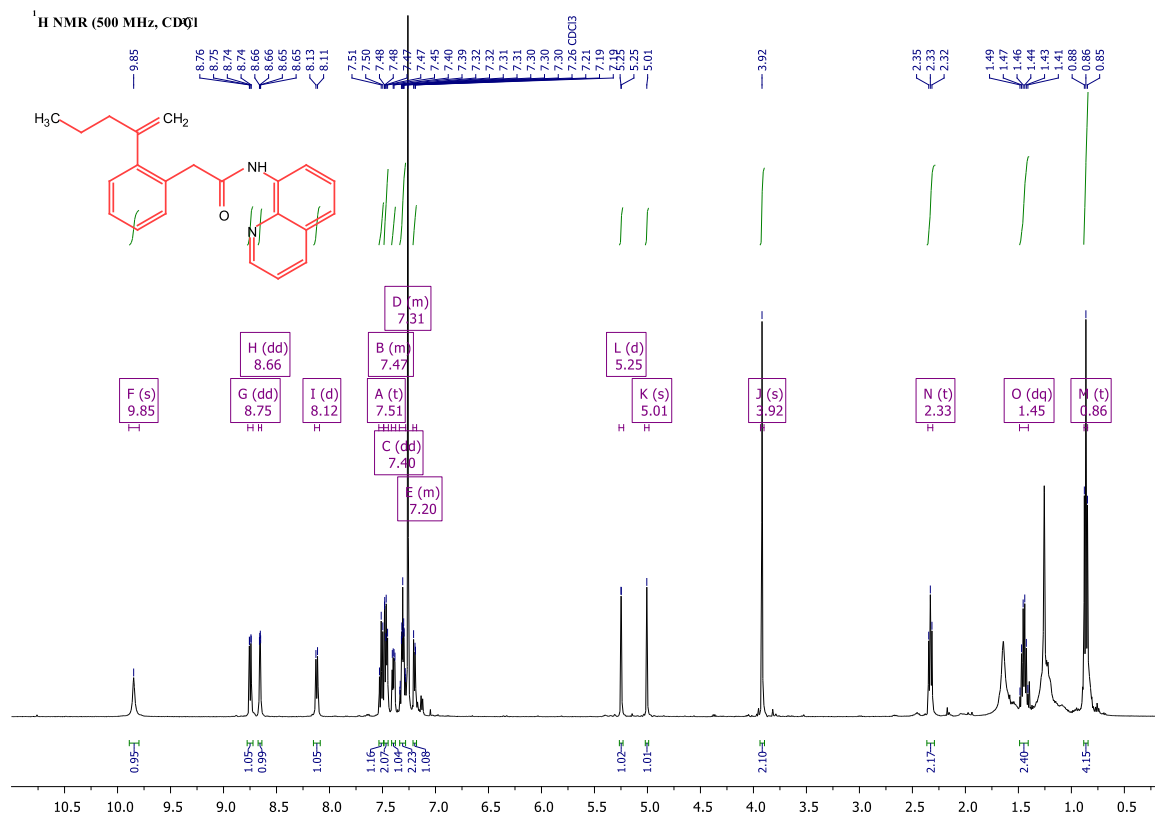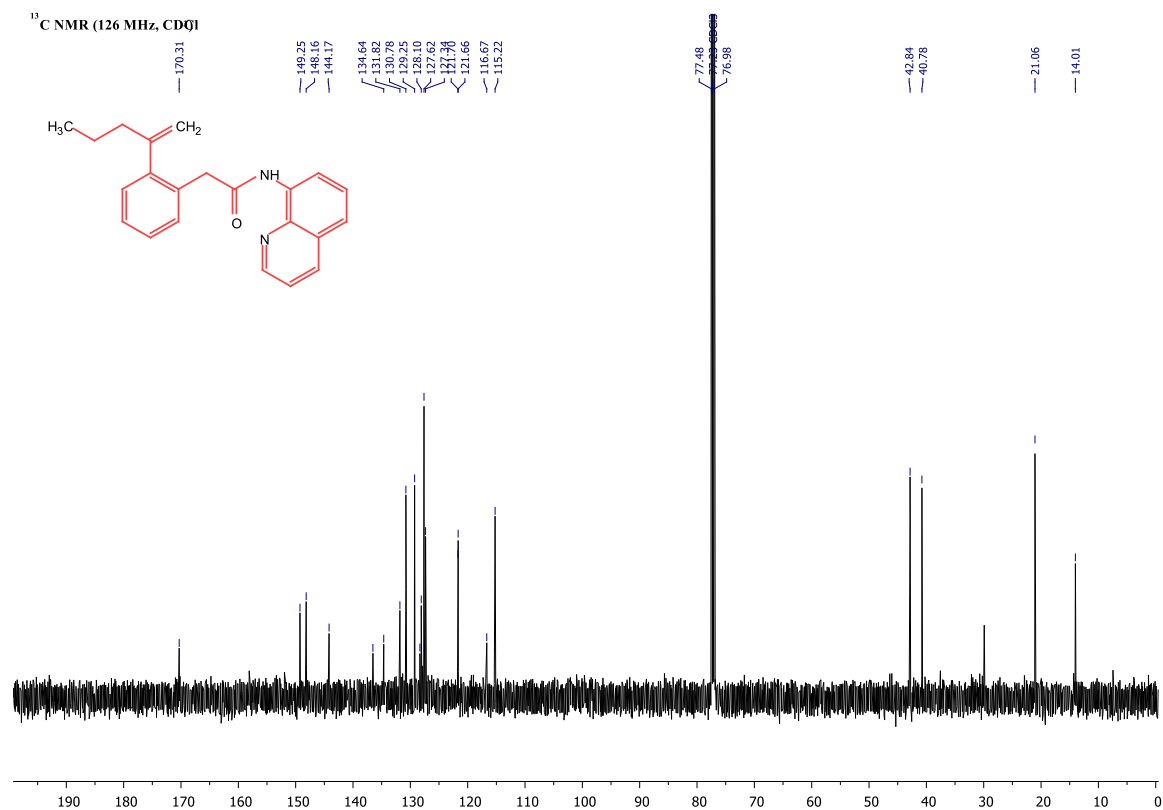

## Scheme 2, entry 3d:

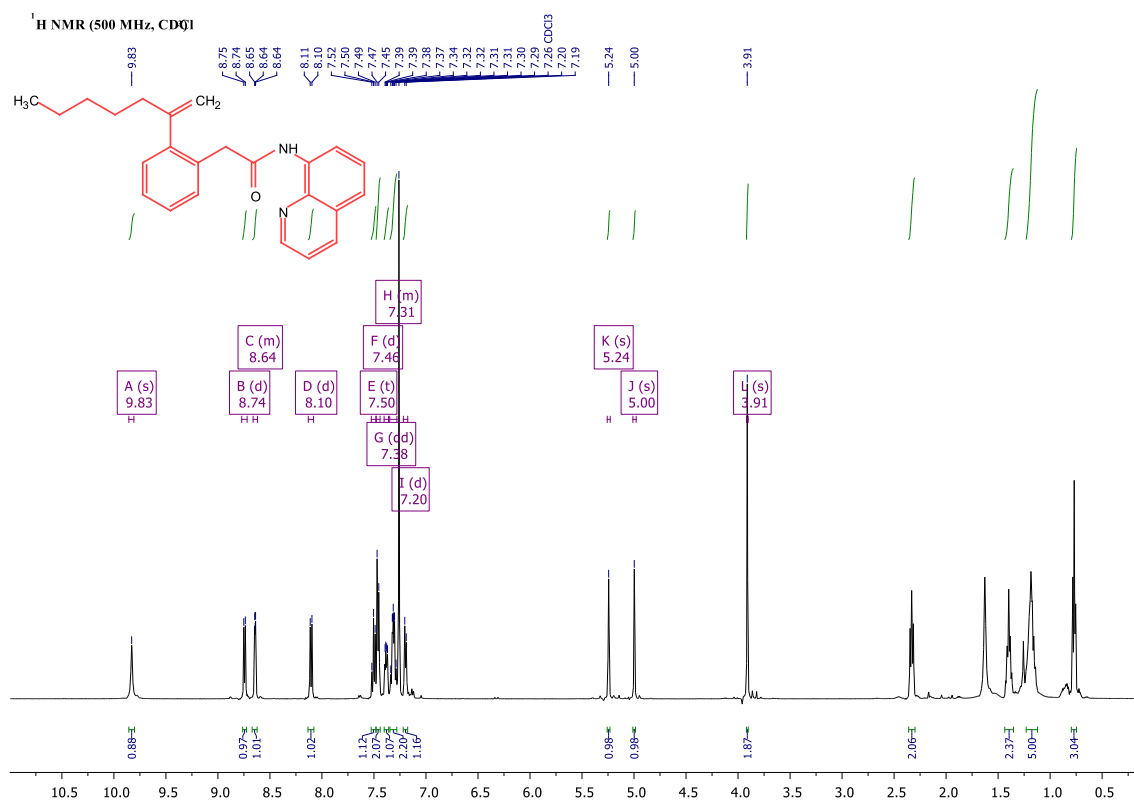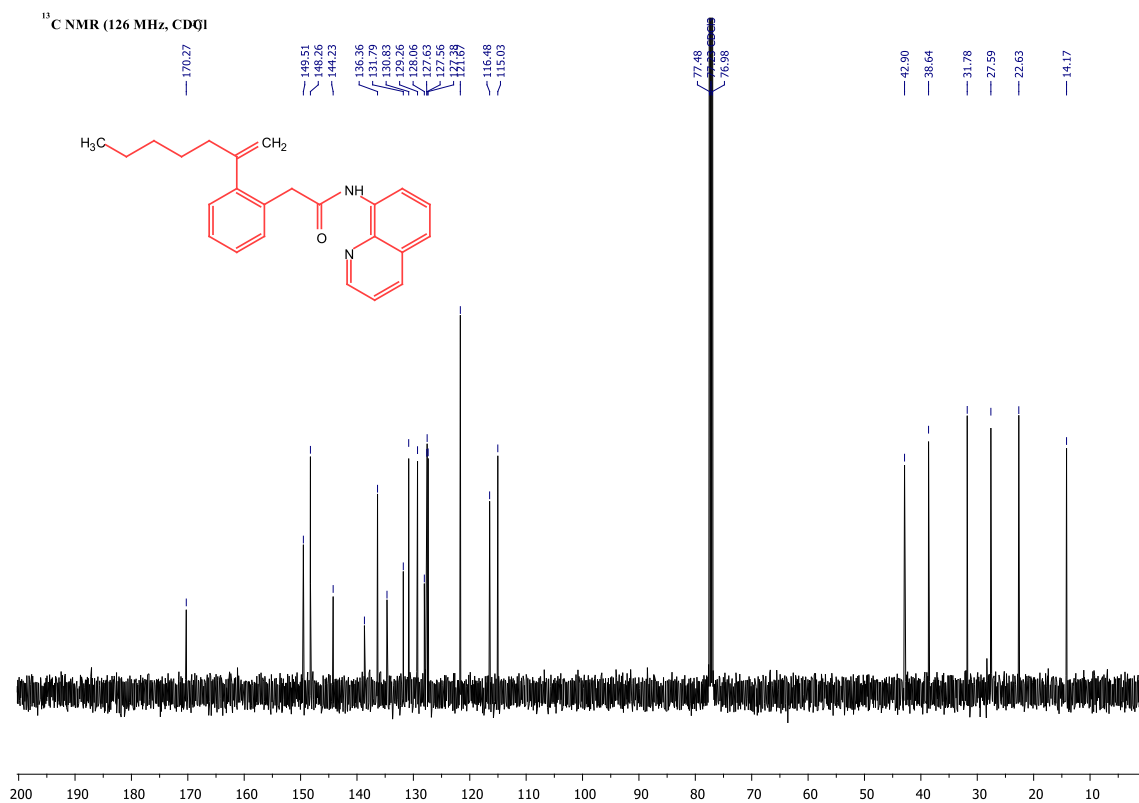

**Scheme 2, entry 3e:**

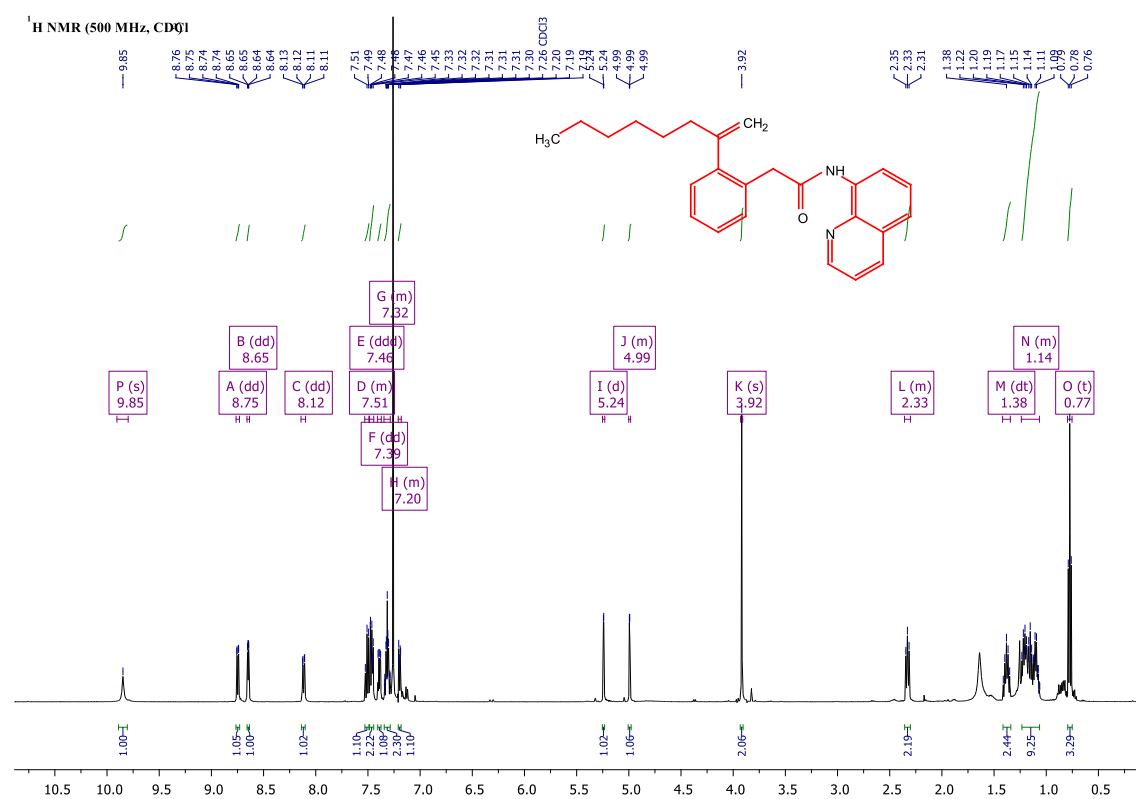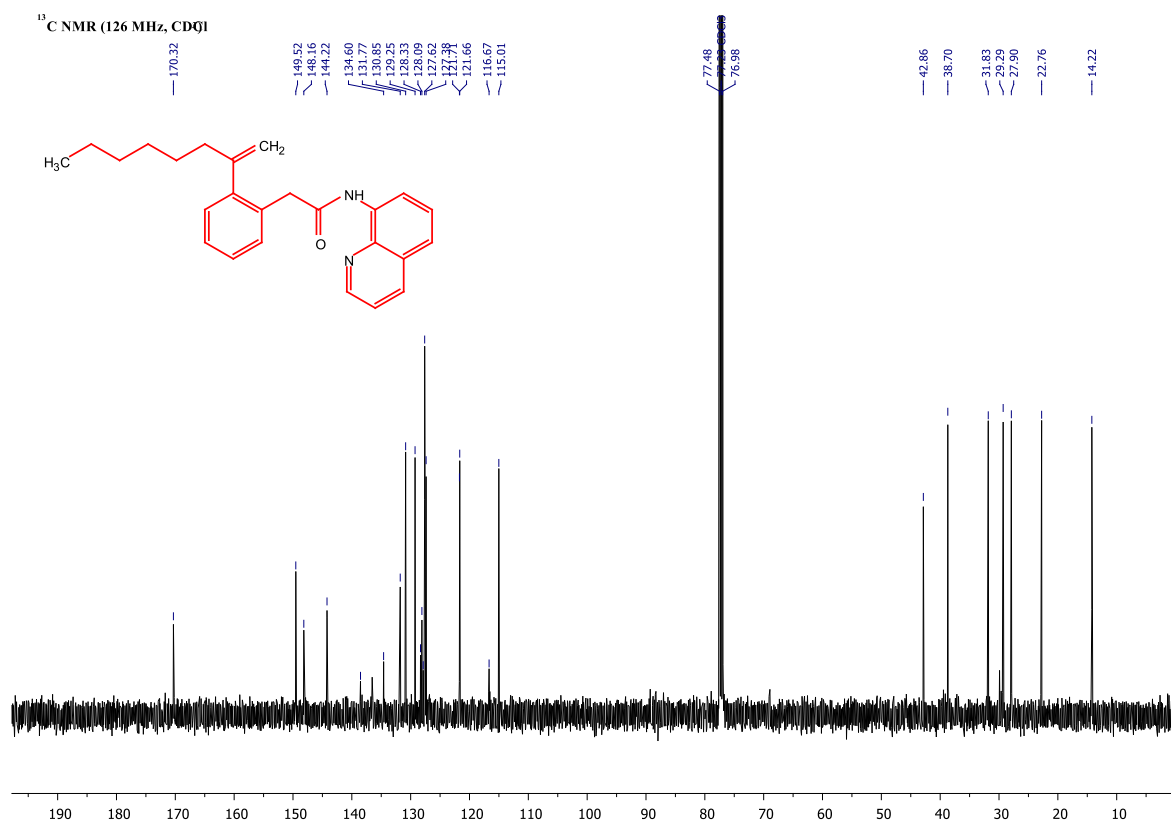

**Scheme 2, entry 3f:**

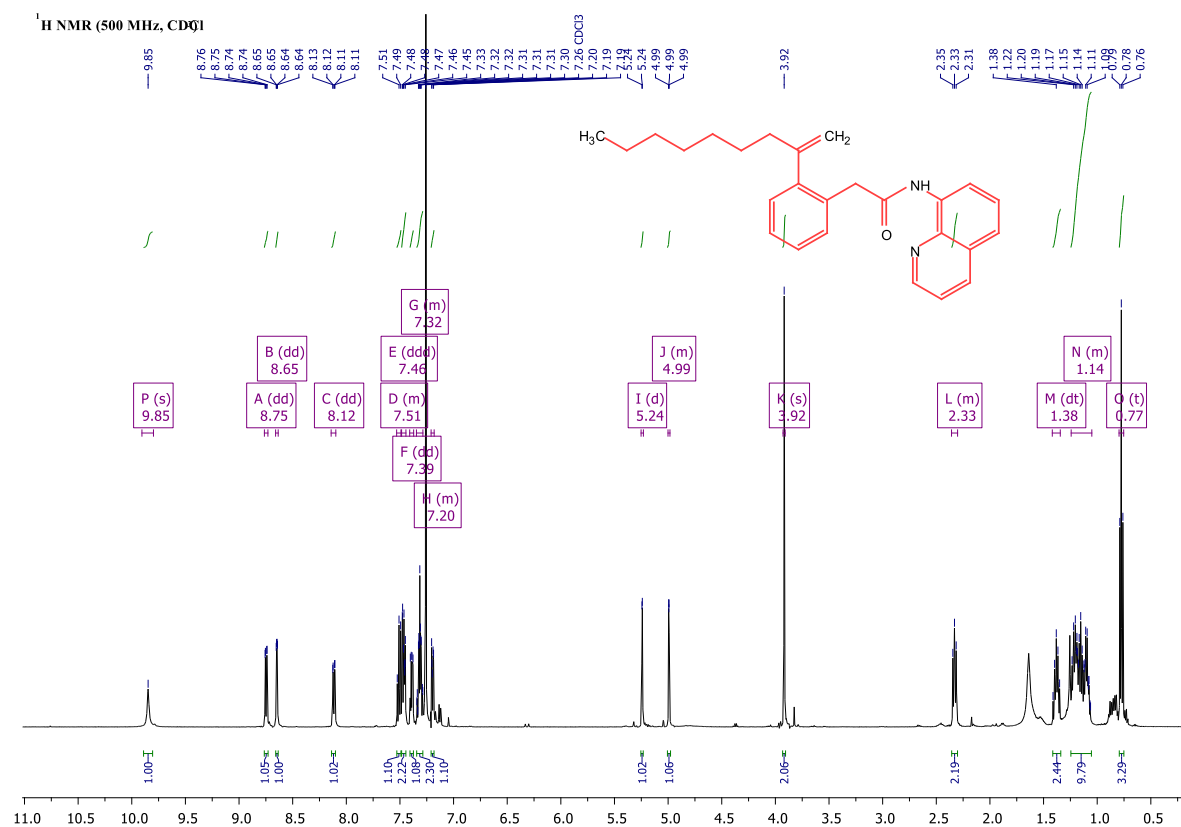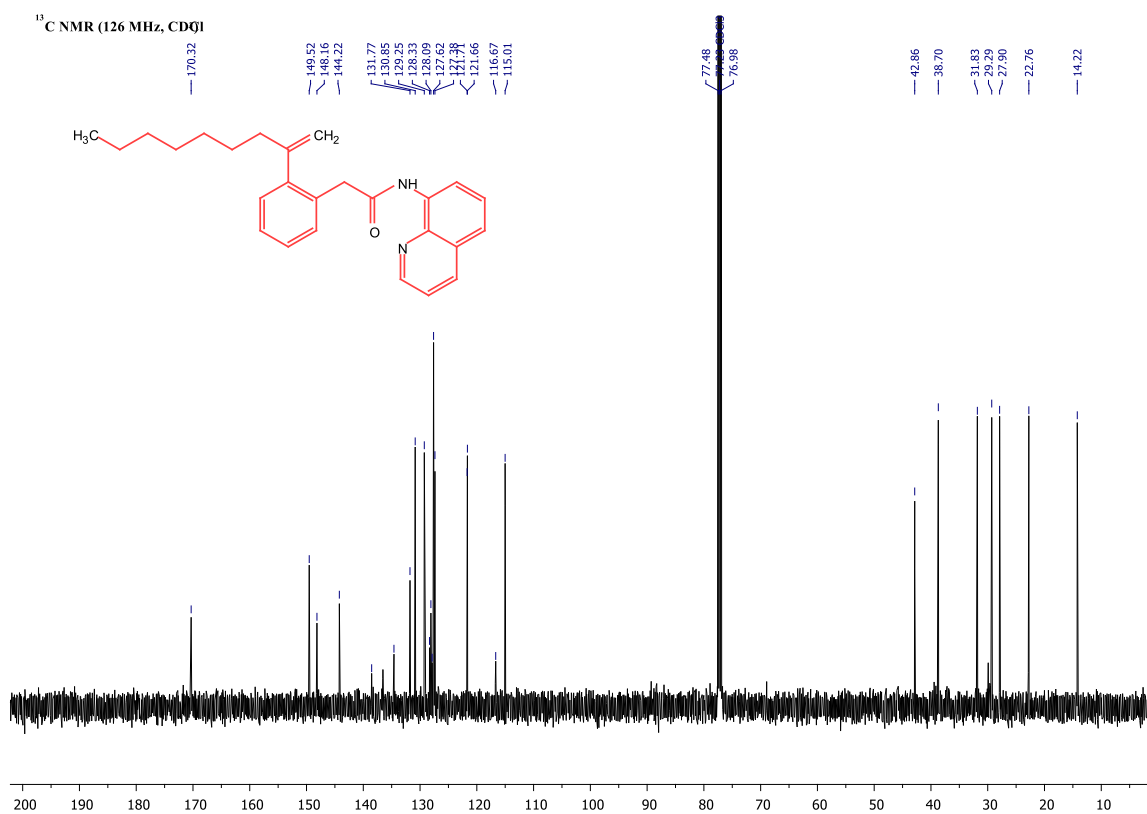

## Scheme 2, entry 3g:

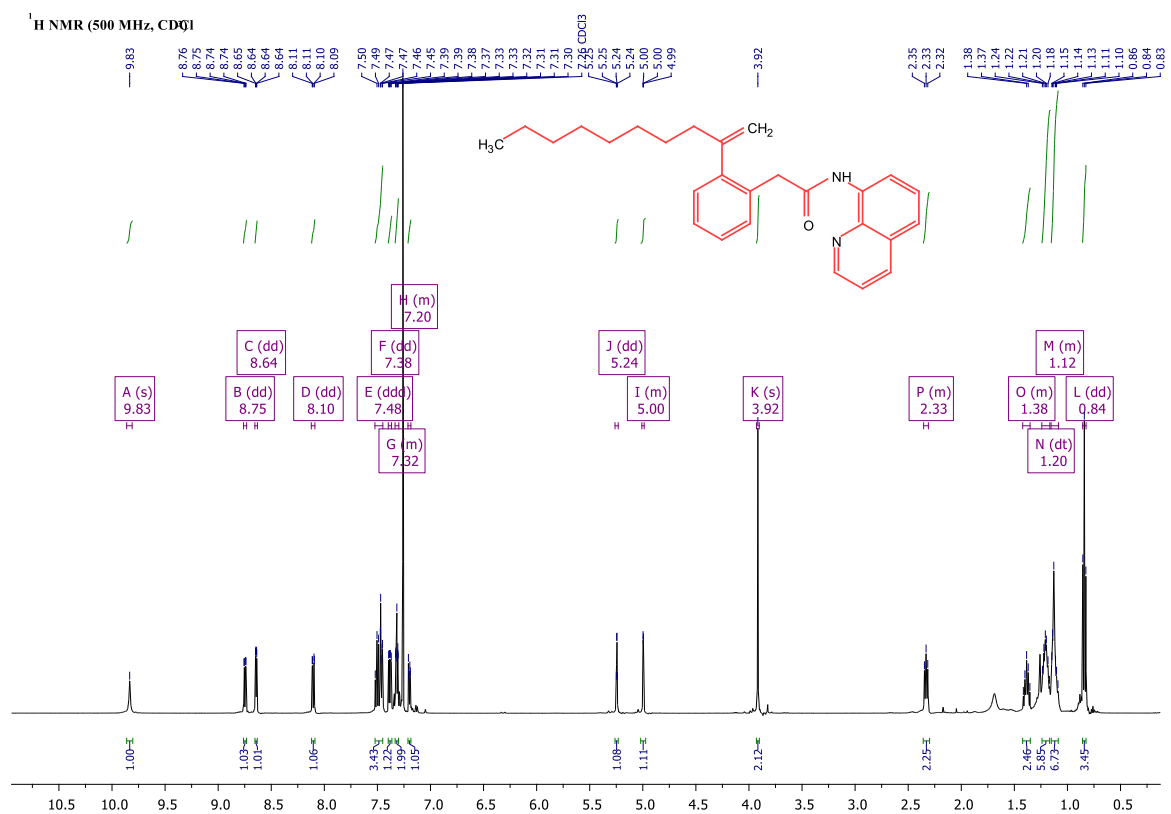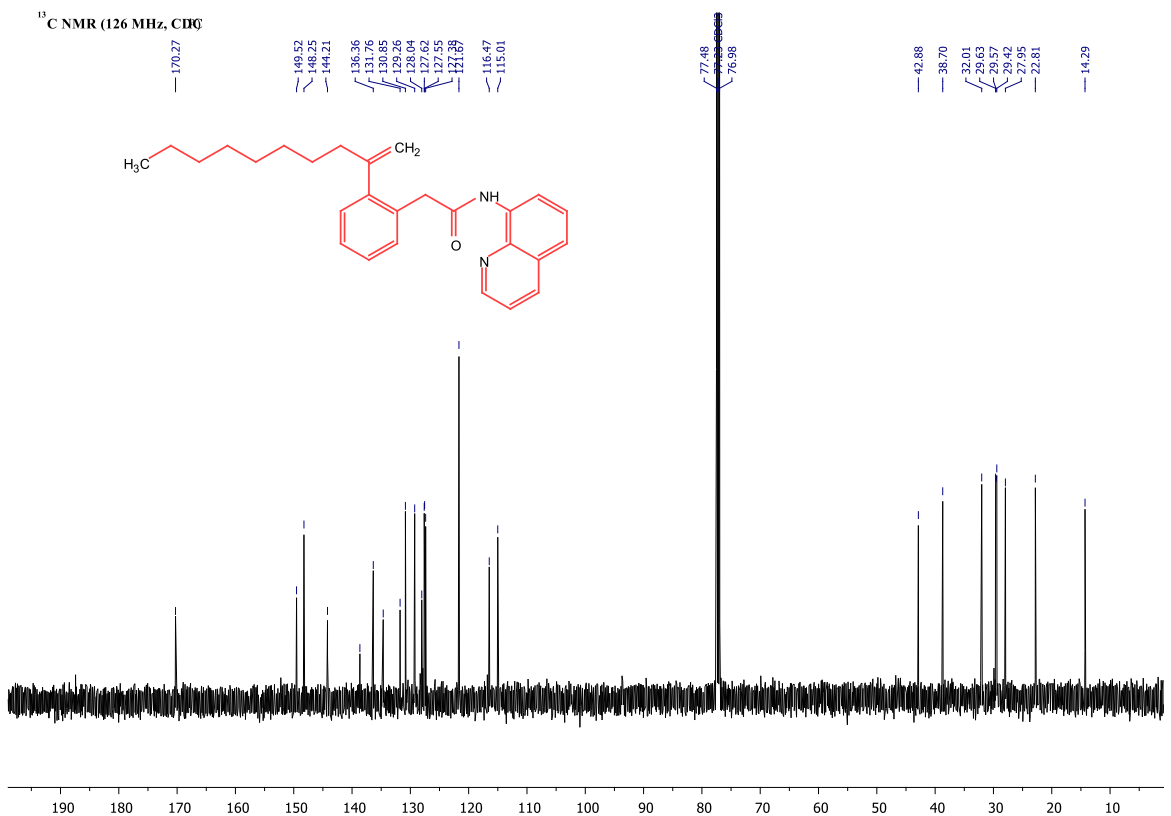

**Scheme 2, entry 3h:**

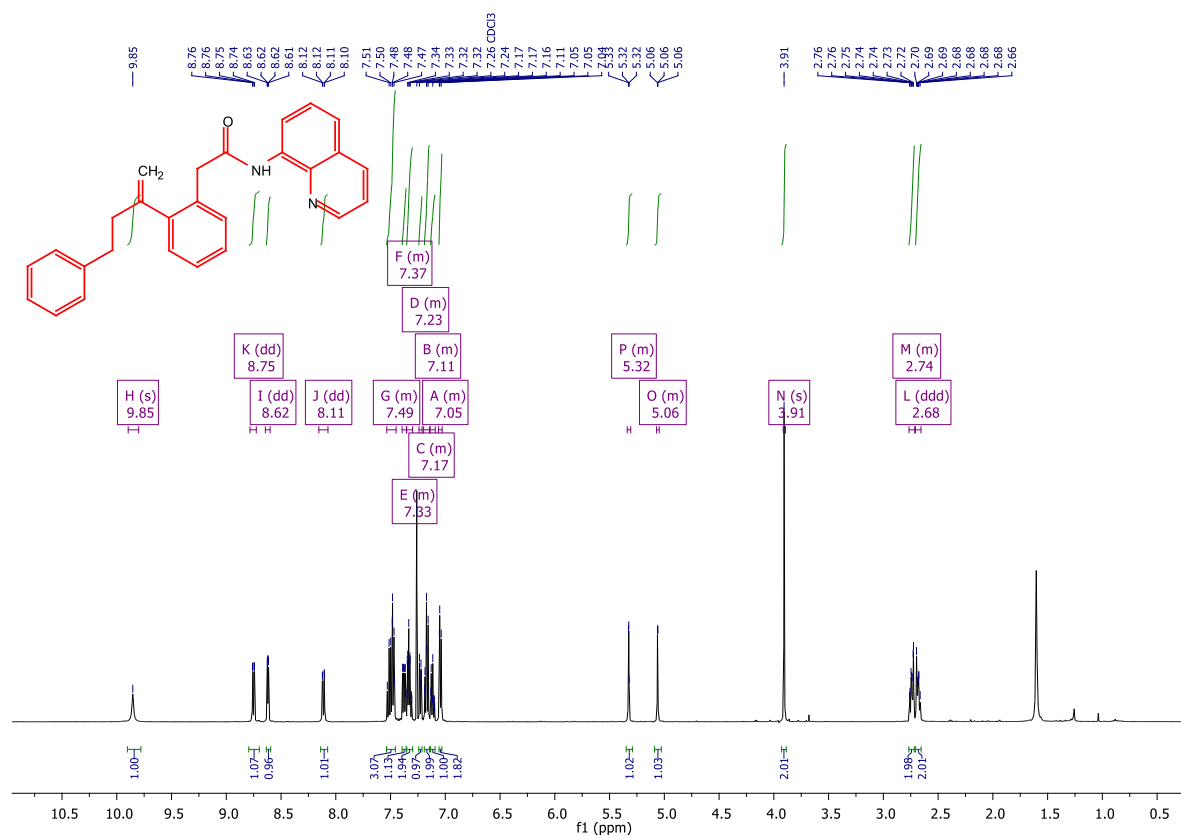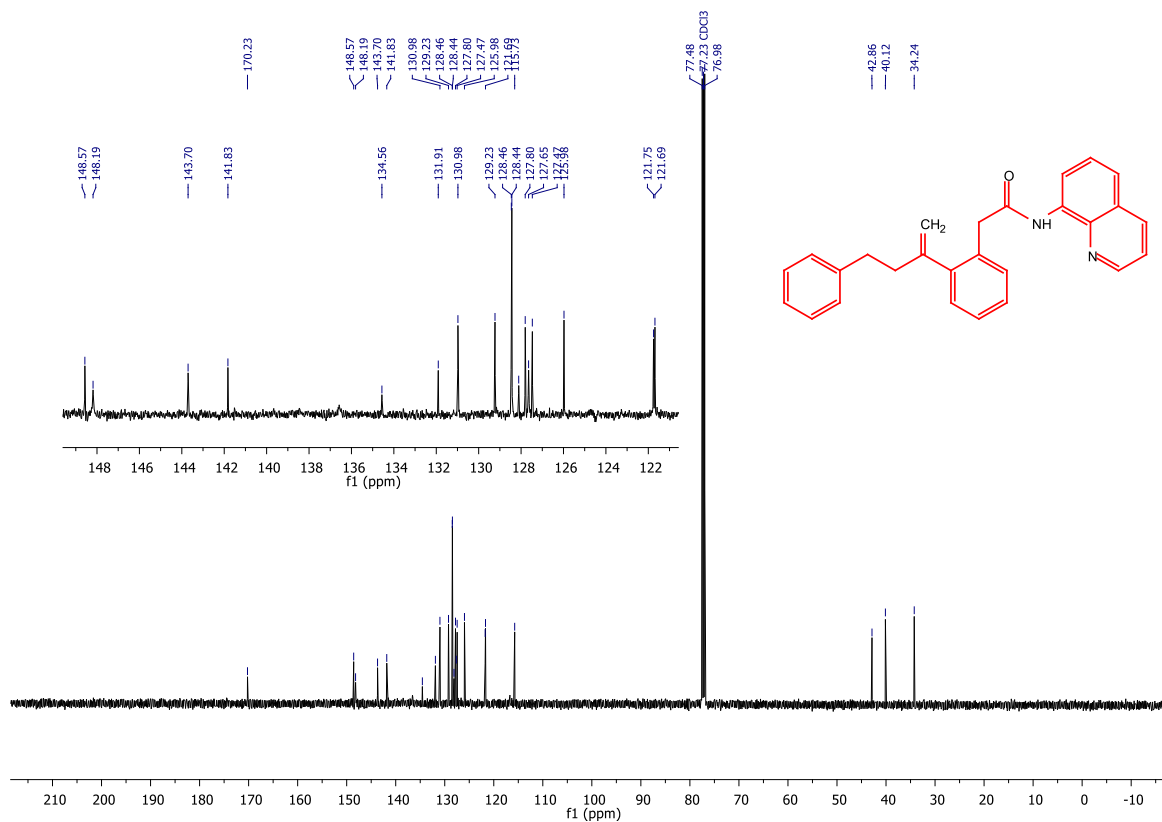

**Scheme 2, entry 3i:**

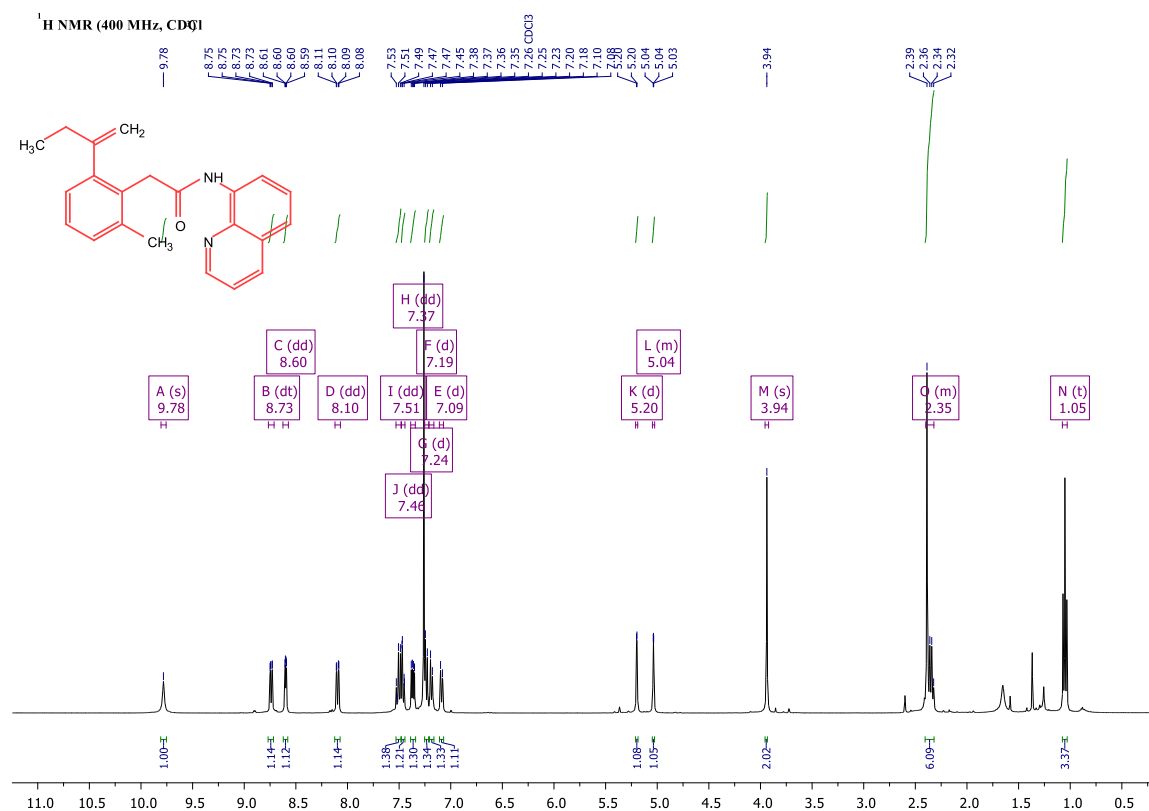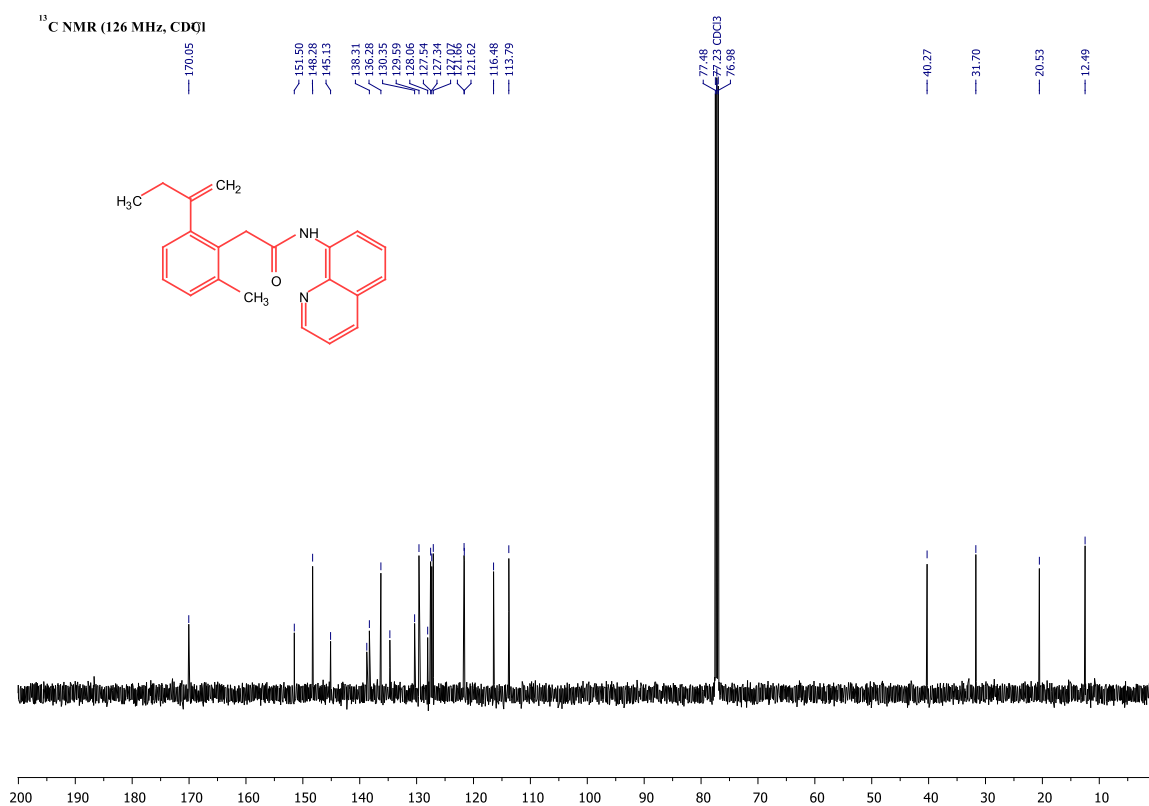

**Scheme 2, entry 3j:**



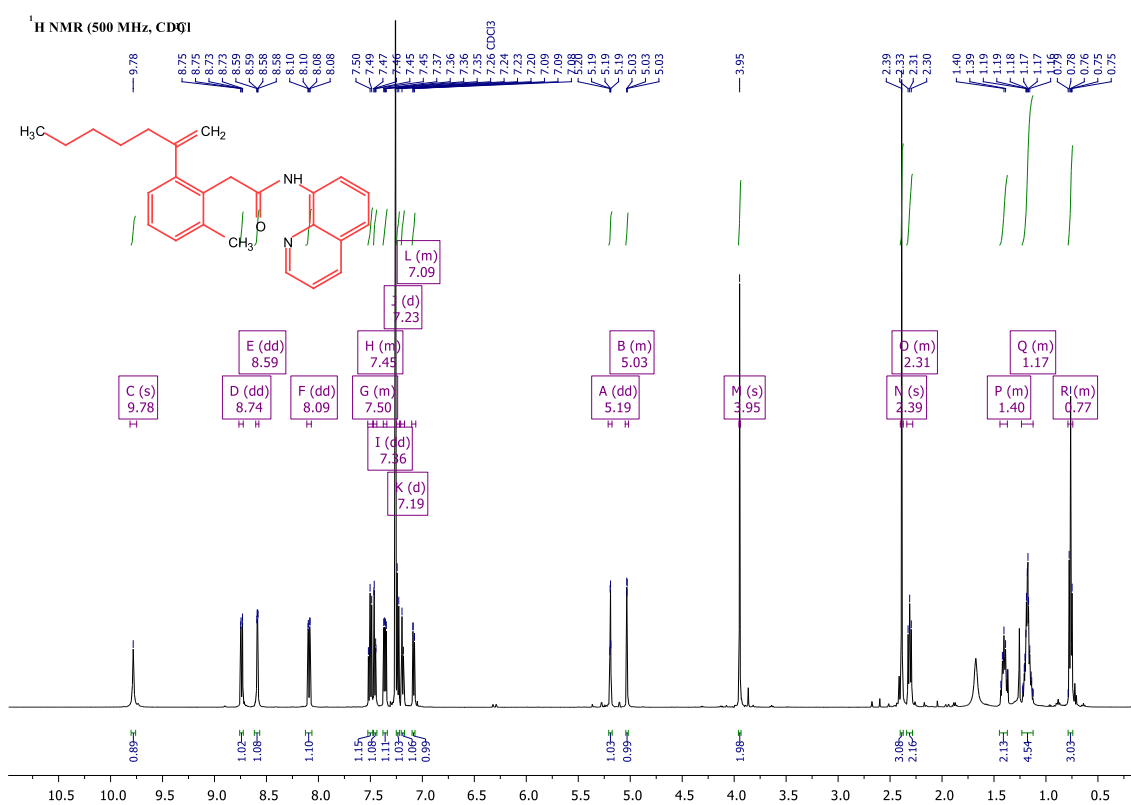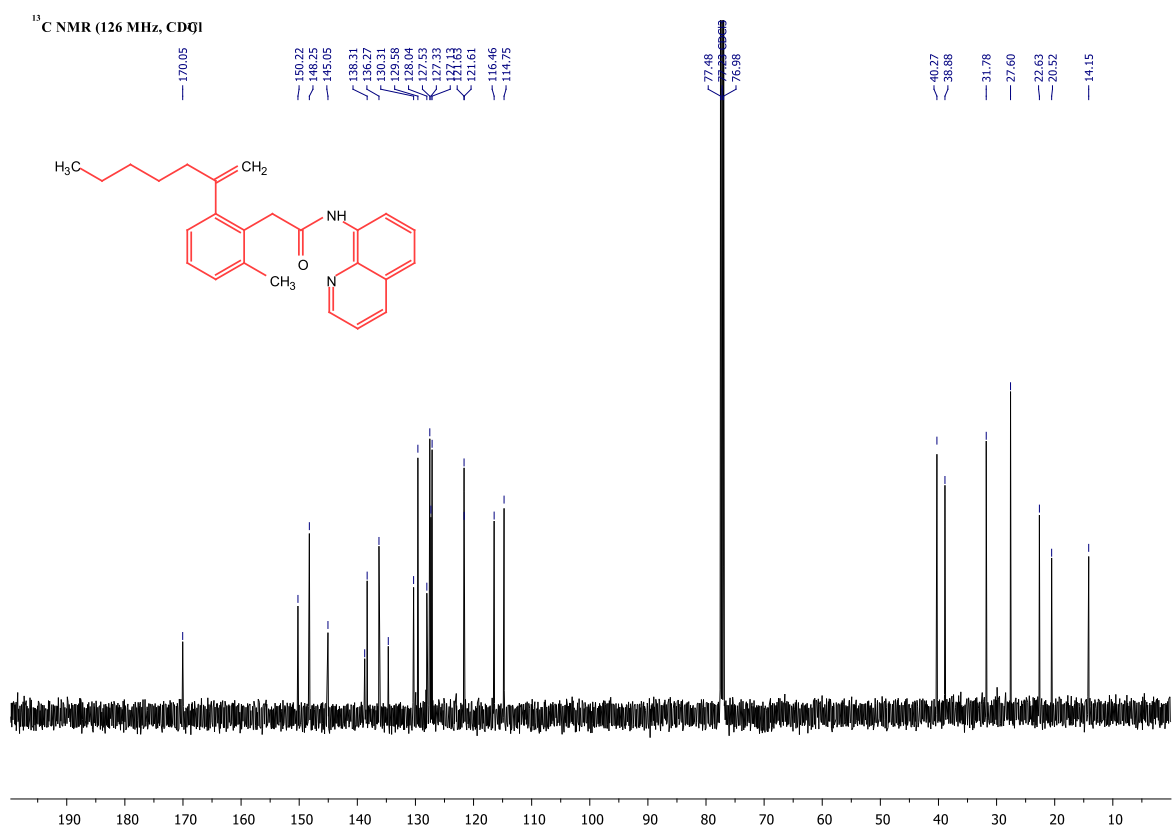

**Scheme 2, entry 3k:**

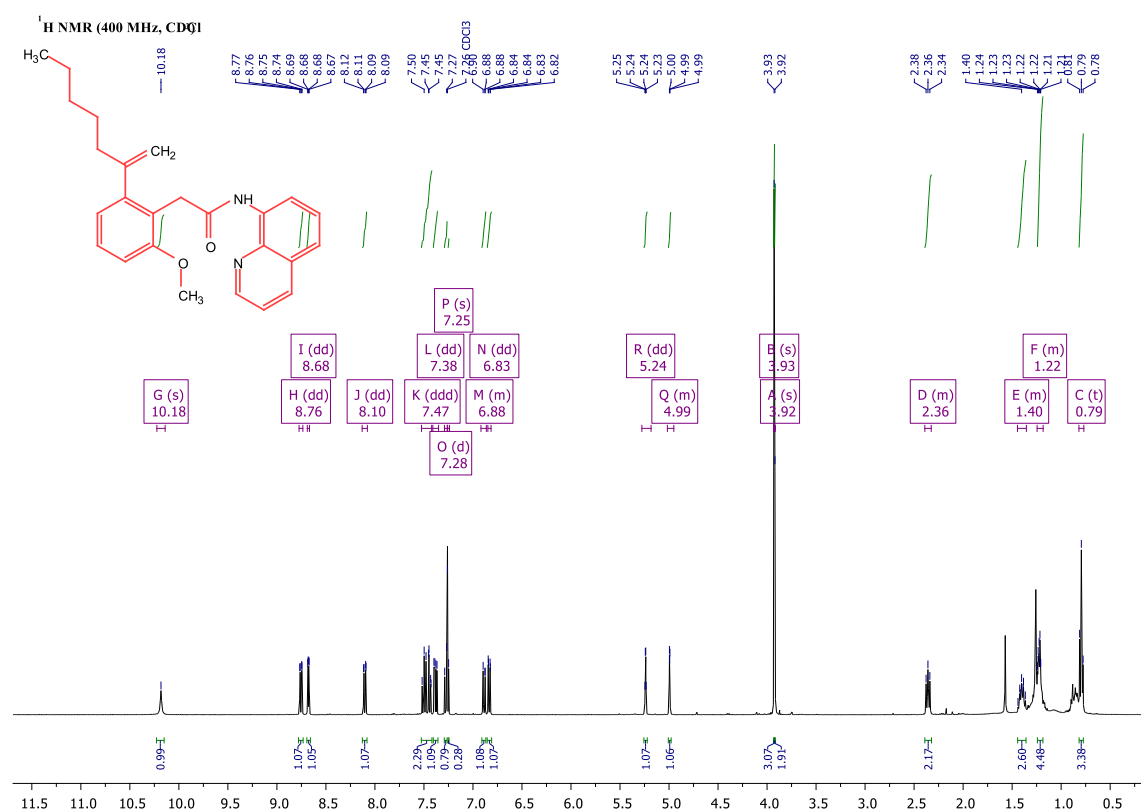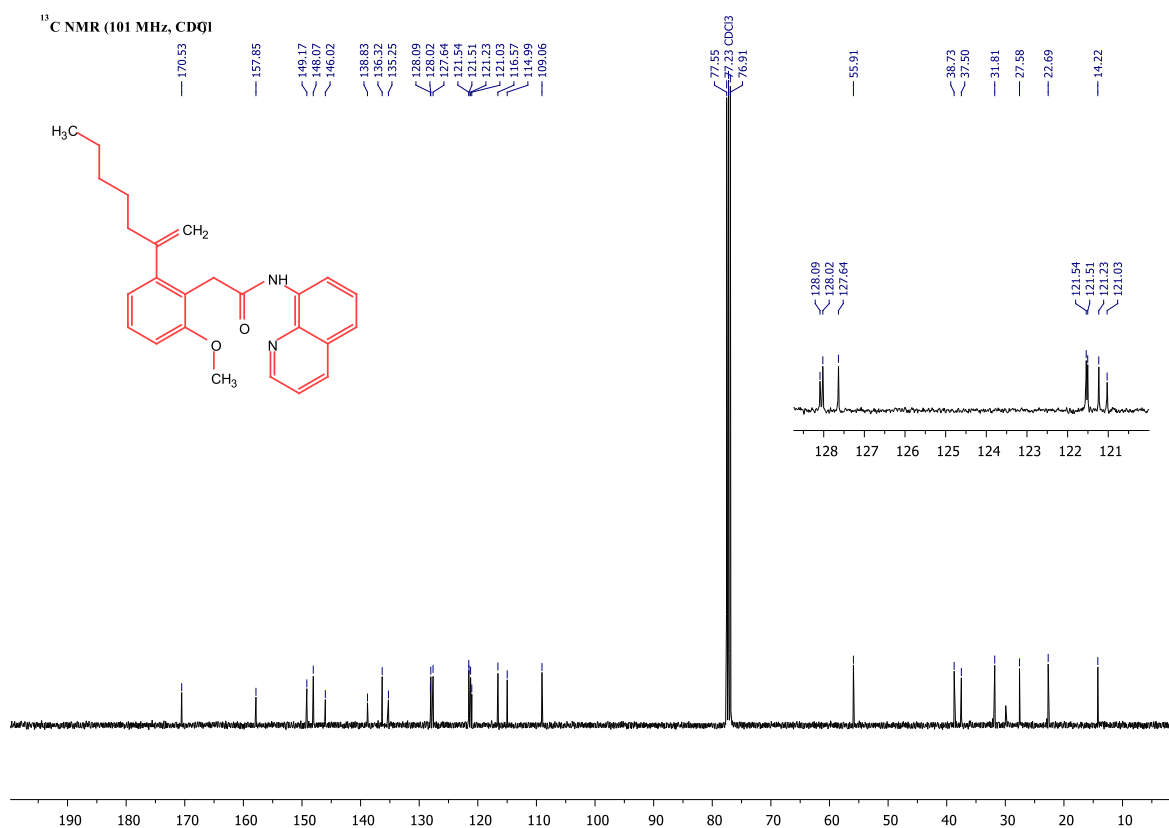

**Scheme 2, entry 3l:**

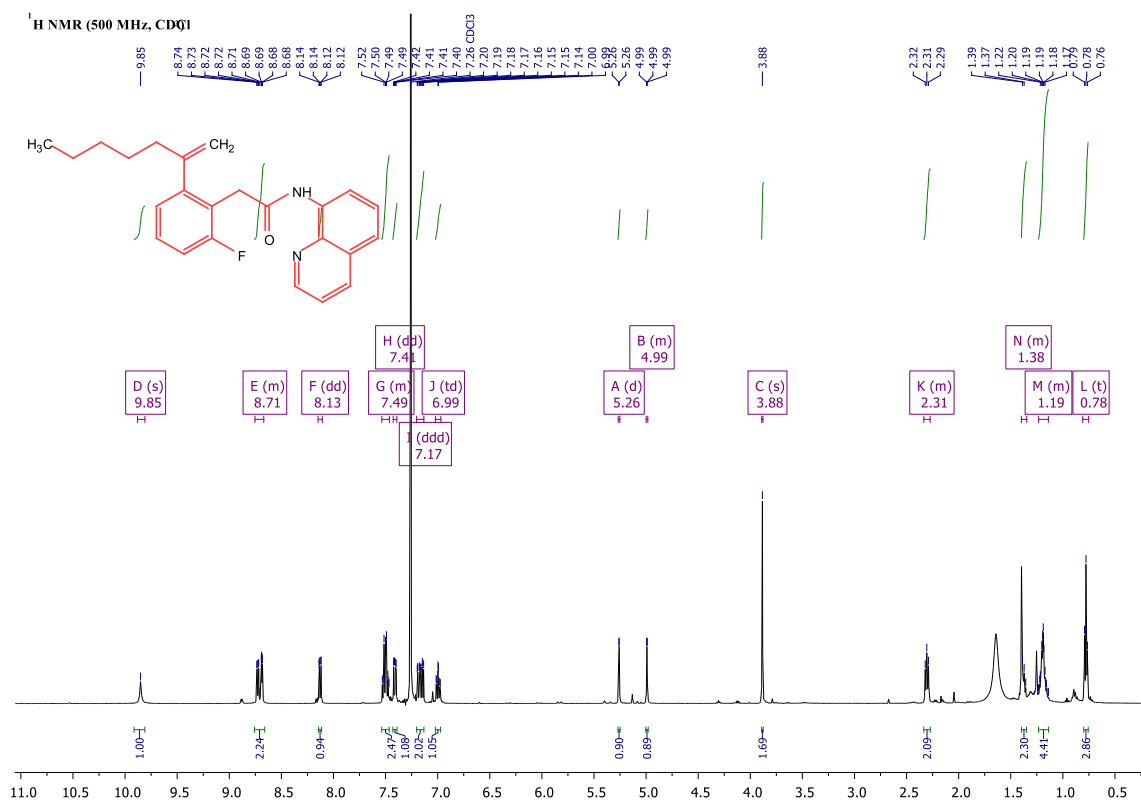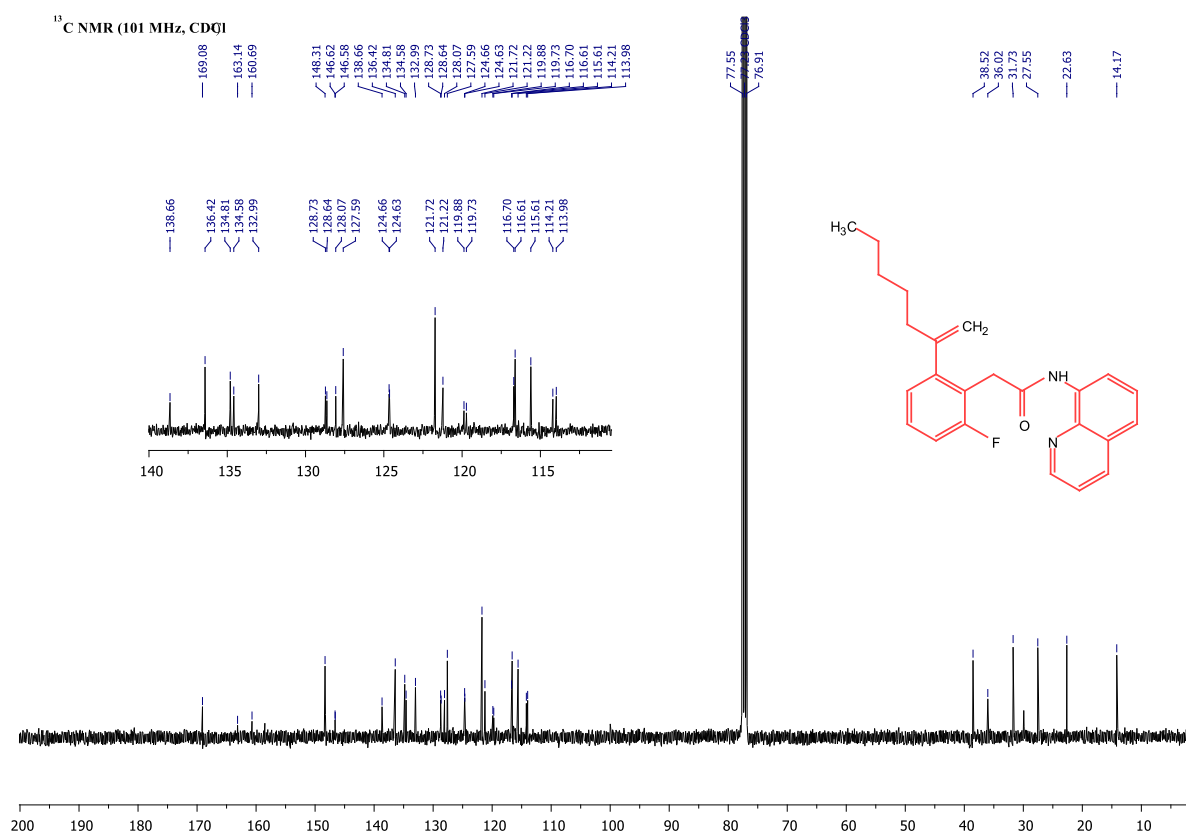

**Scheme 2, entry 3m:**



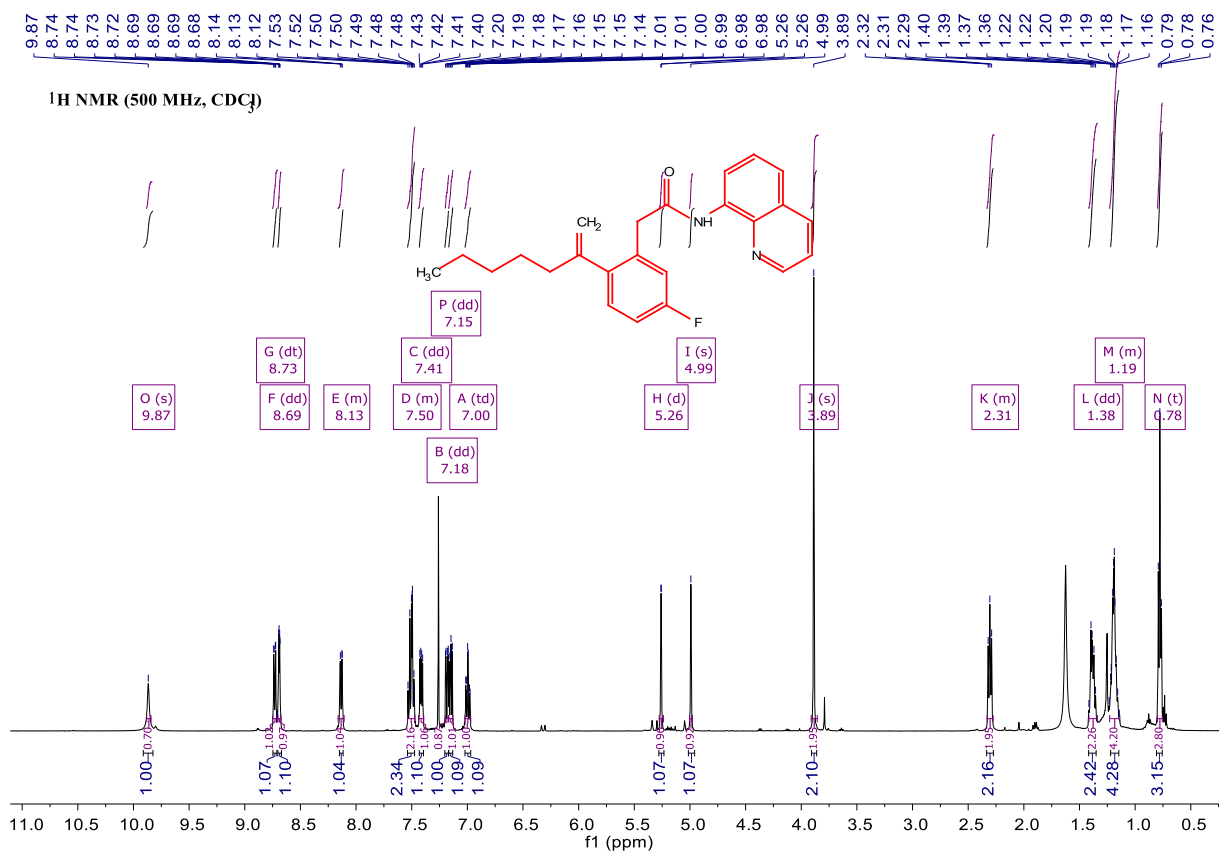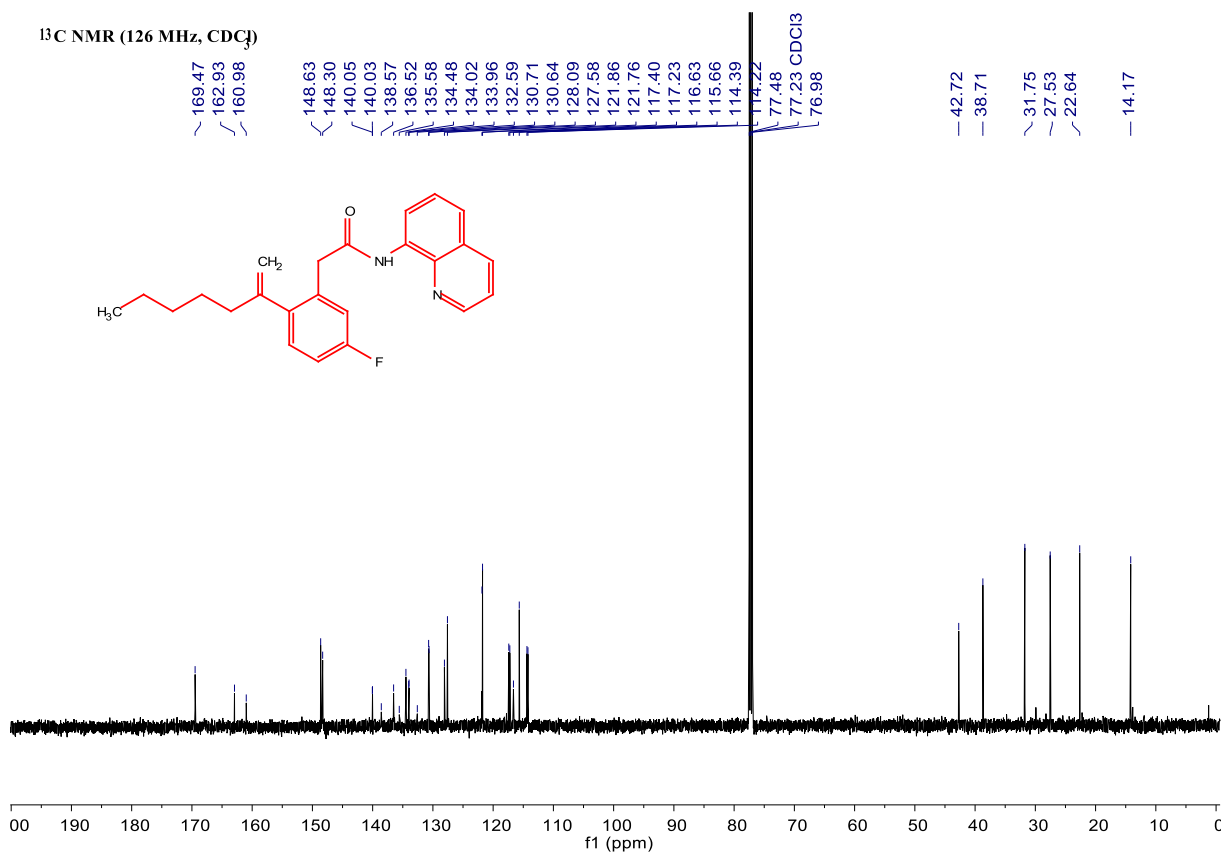

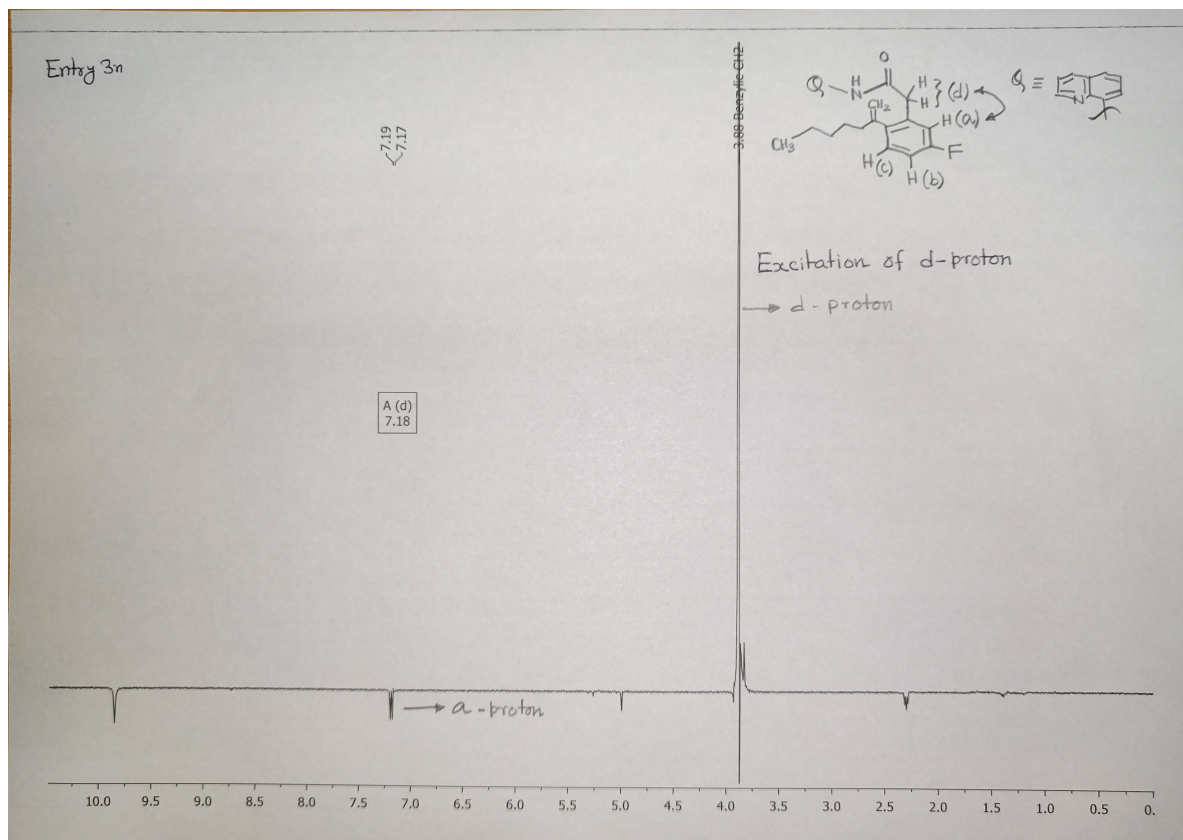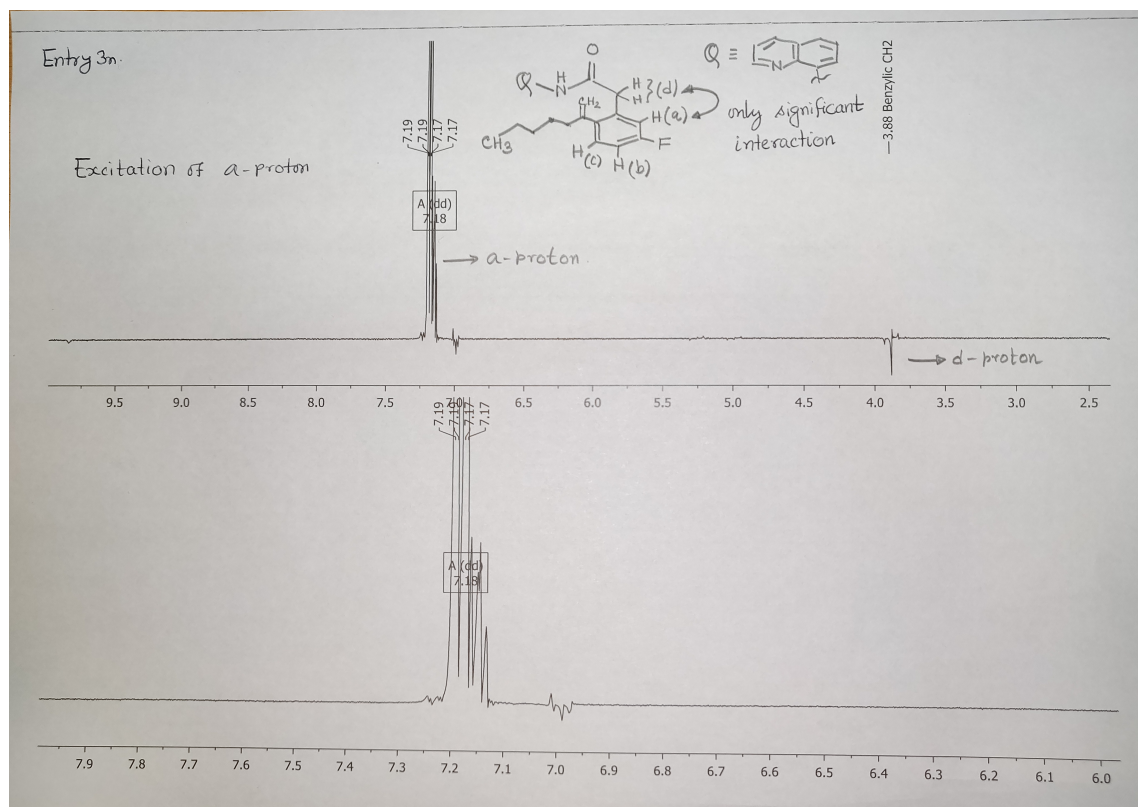

**Scheme 2, entry 3o:**

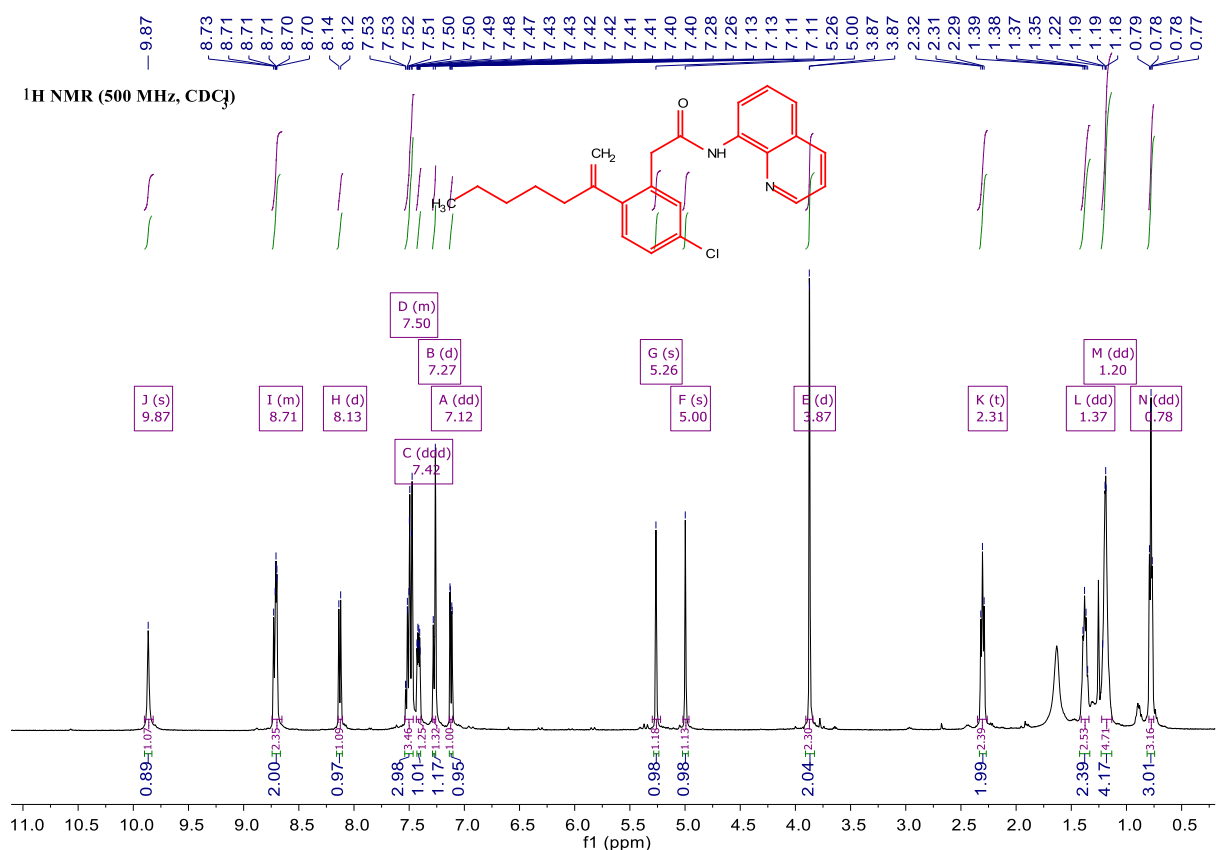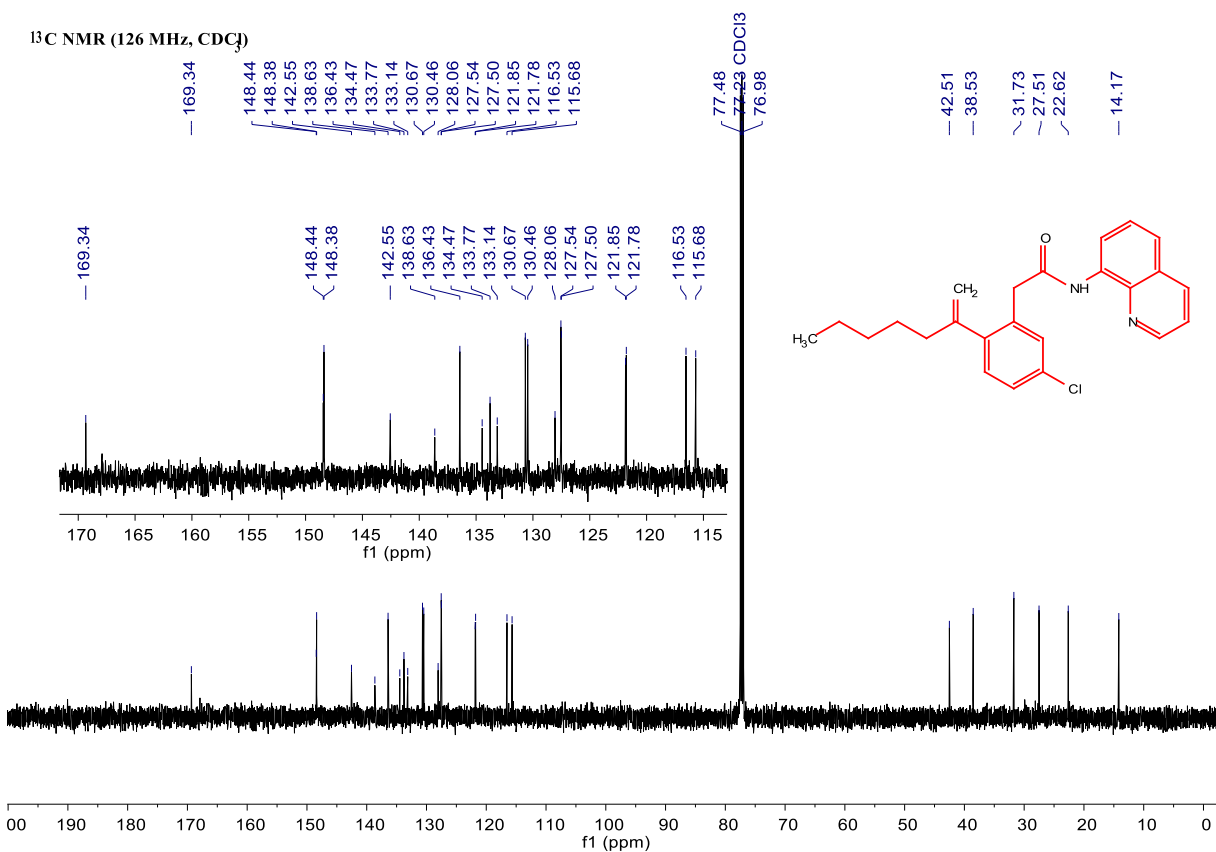



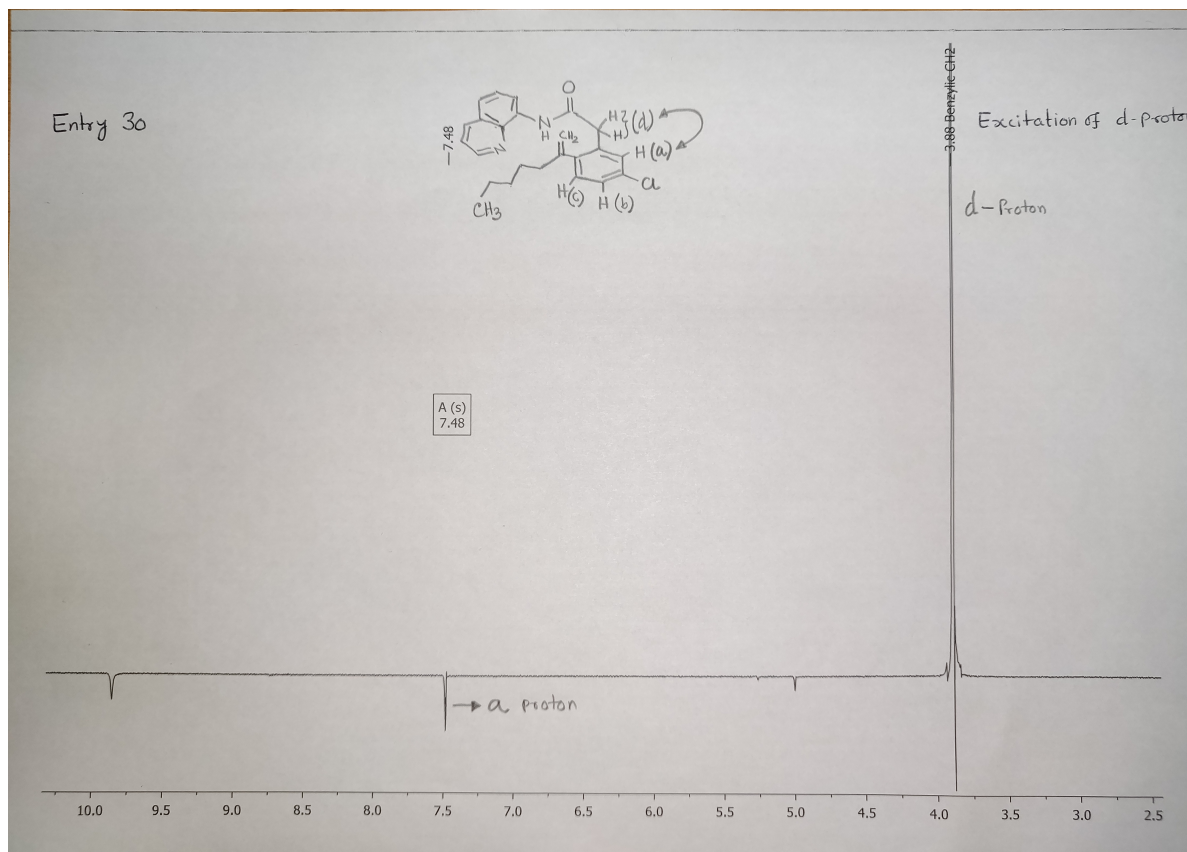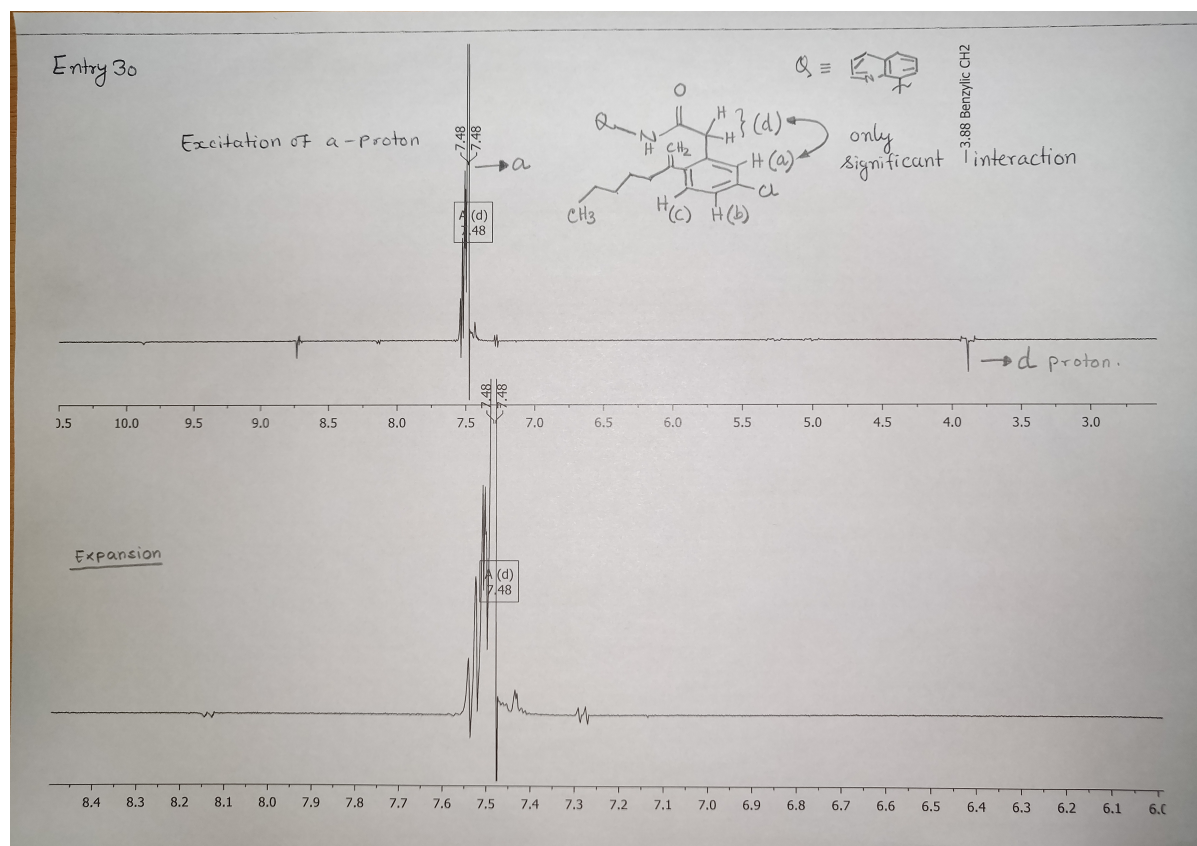



**Scheme 2, entry 3p:**

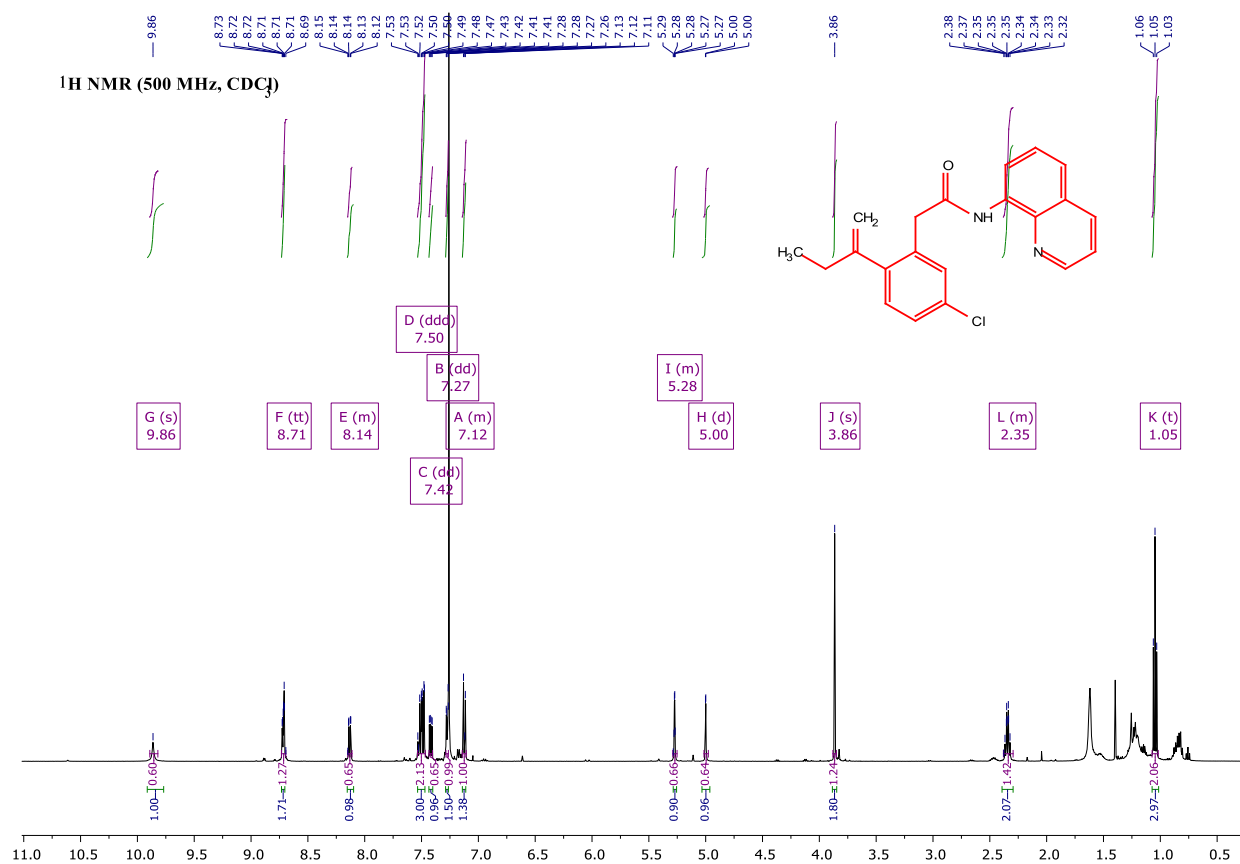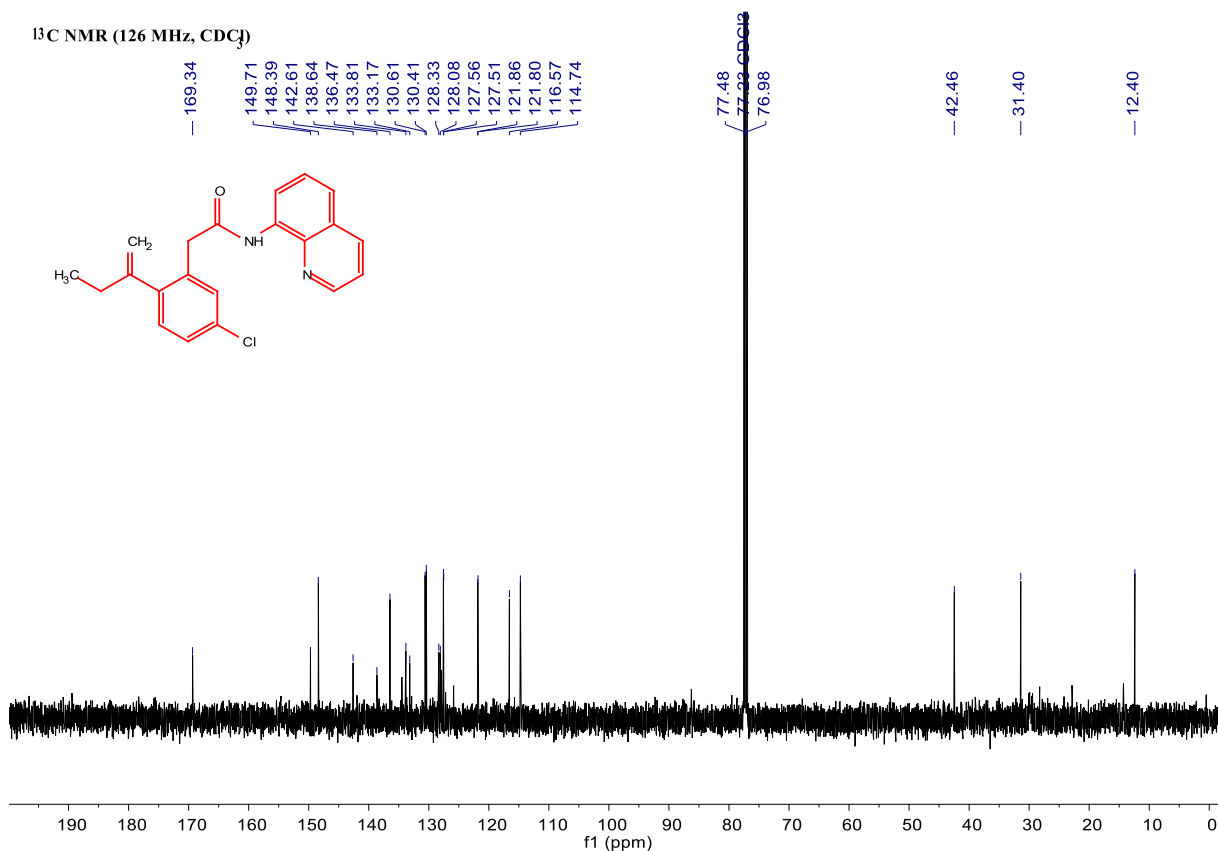

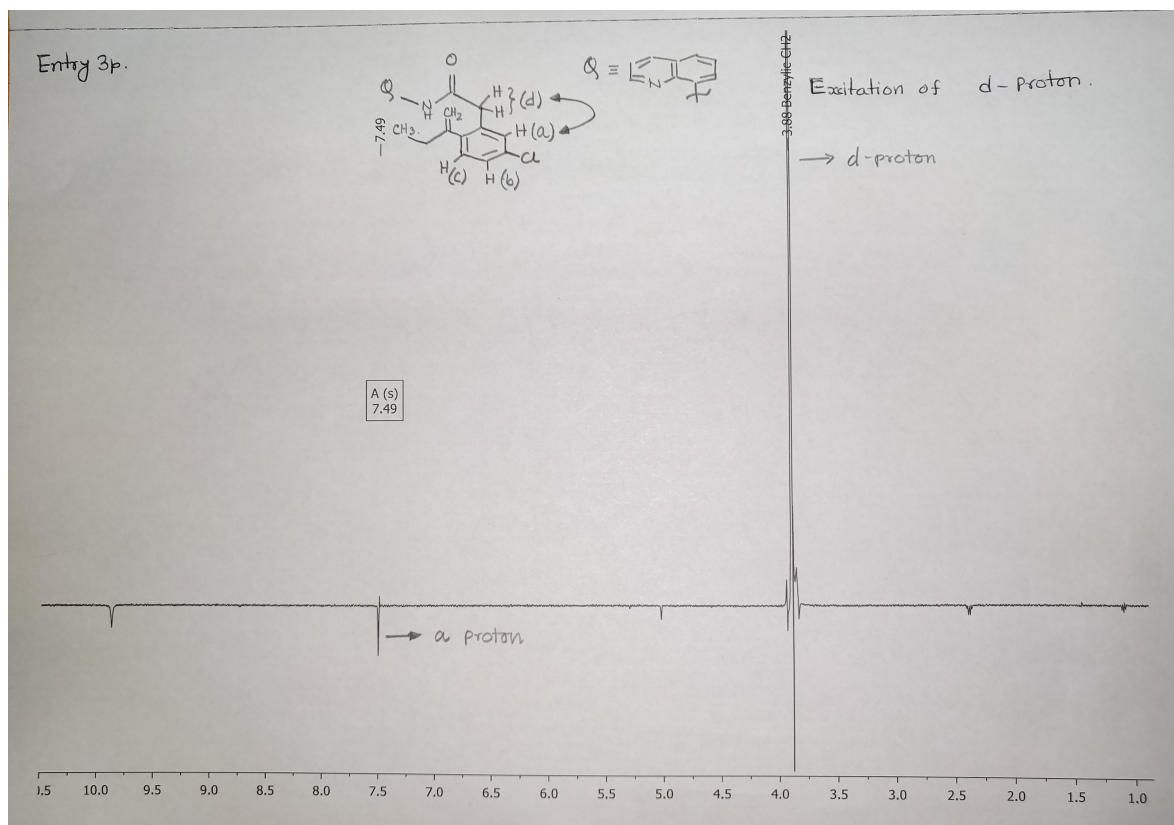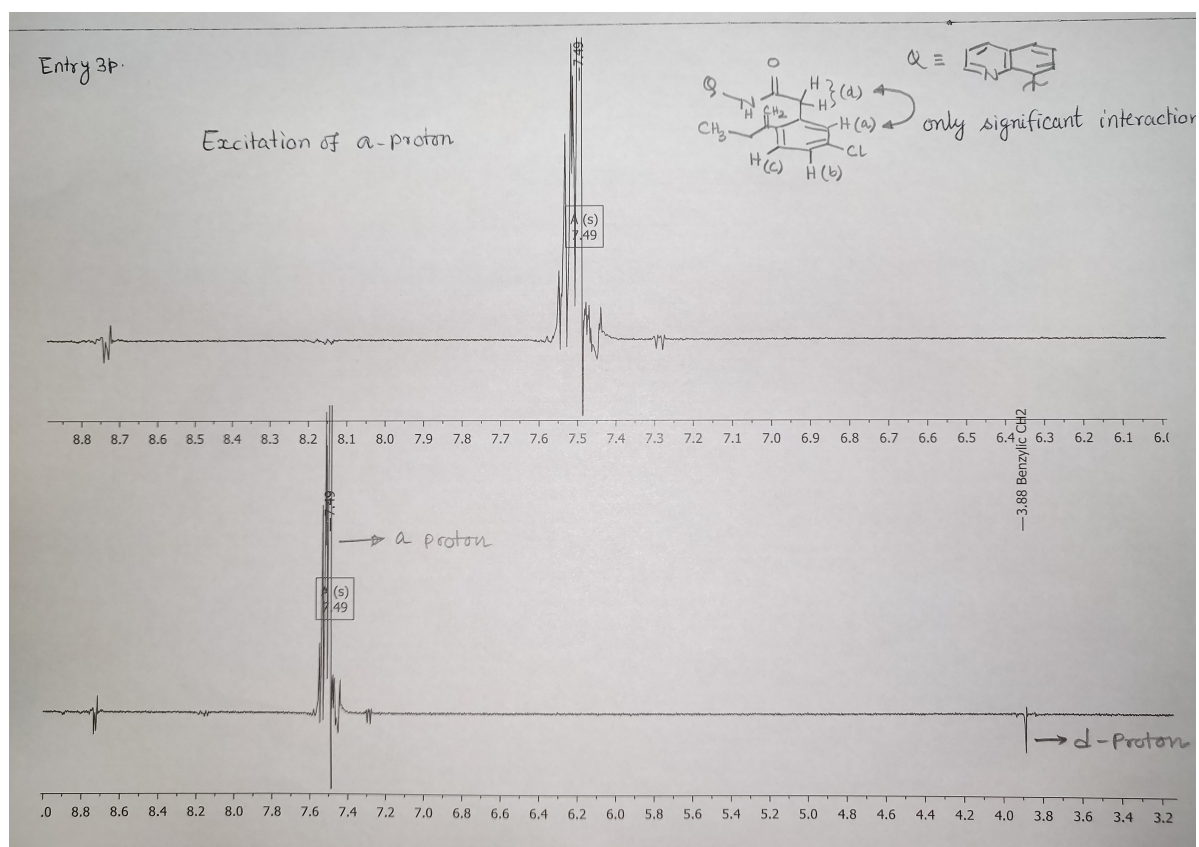

## Scheme 2, entry 3q:

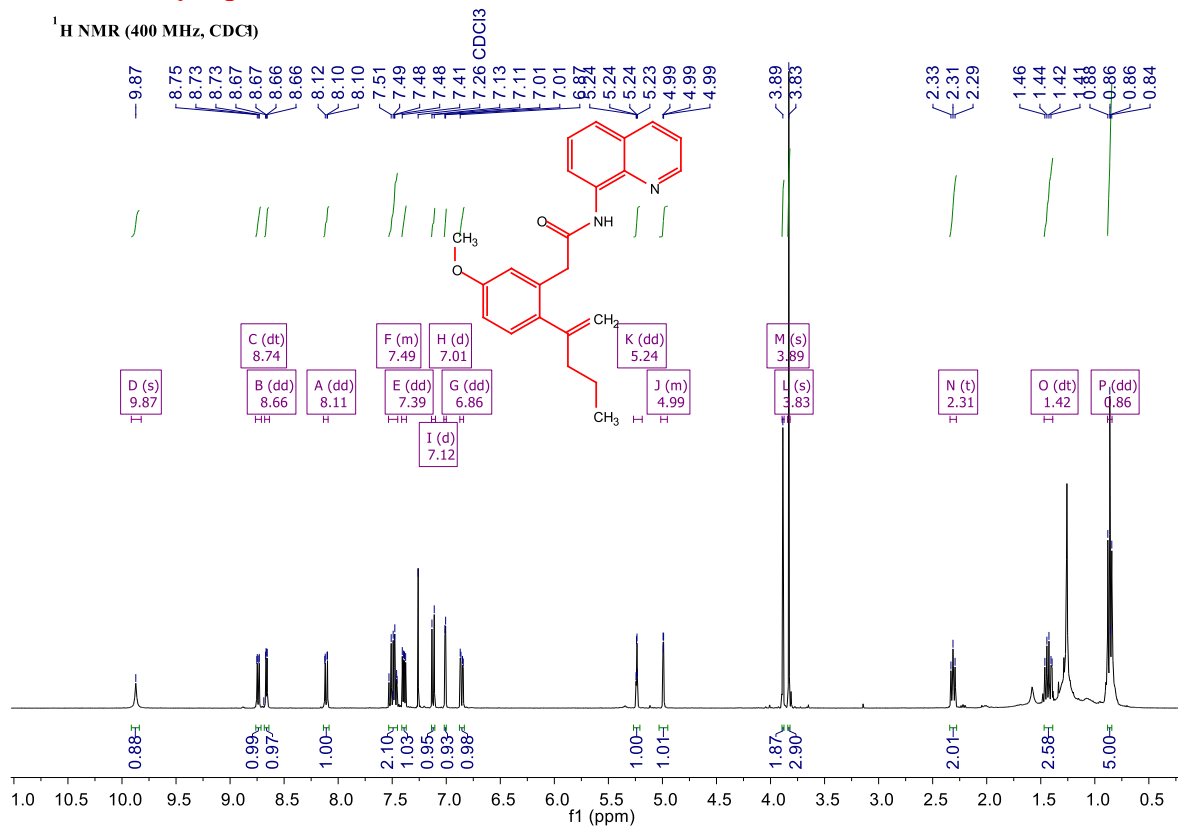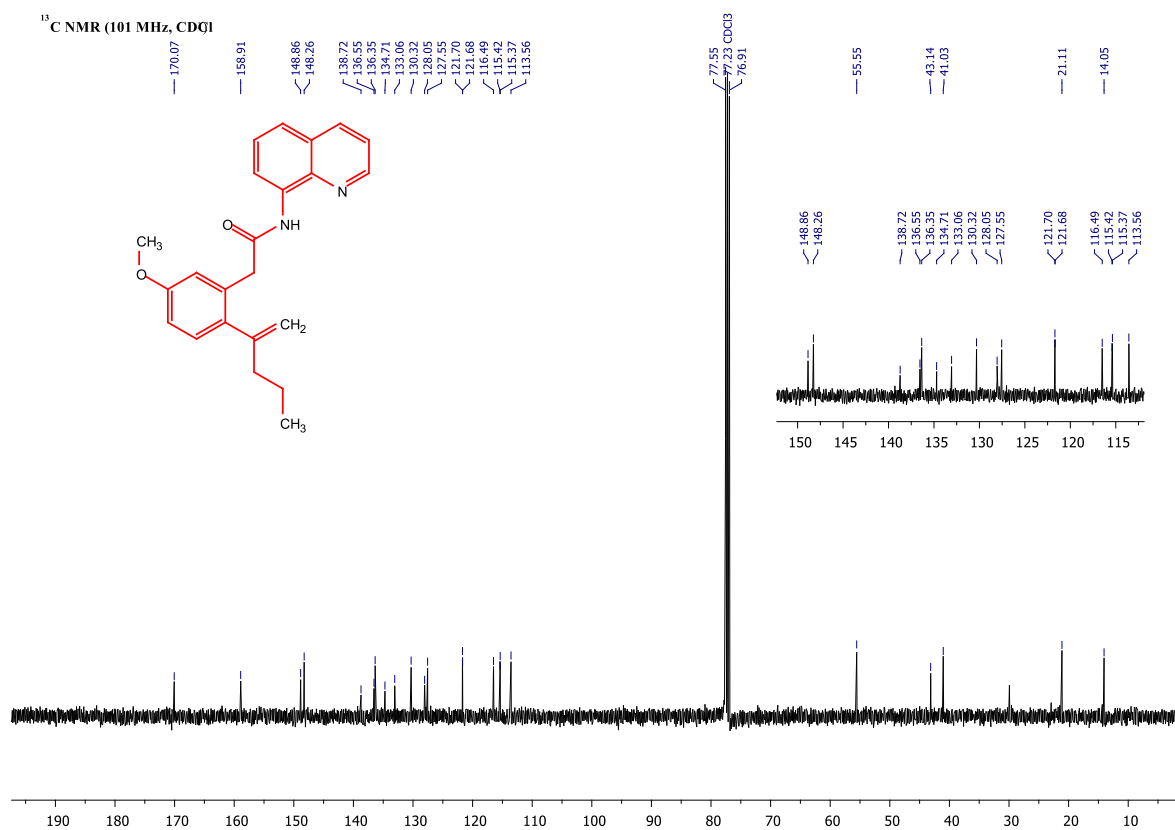

**Scheme 2, entry 3r:**

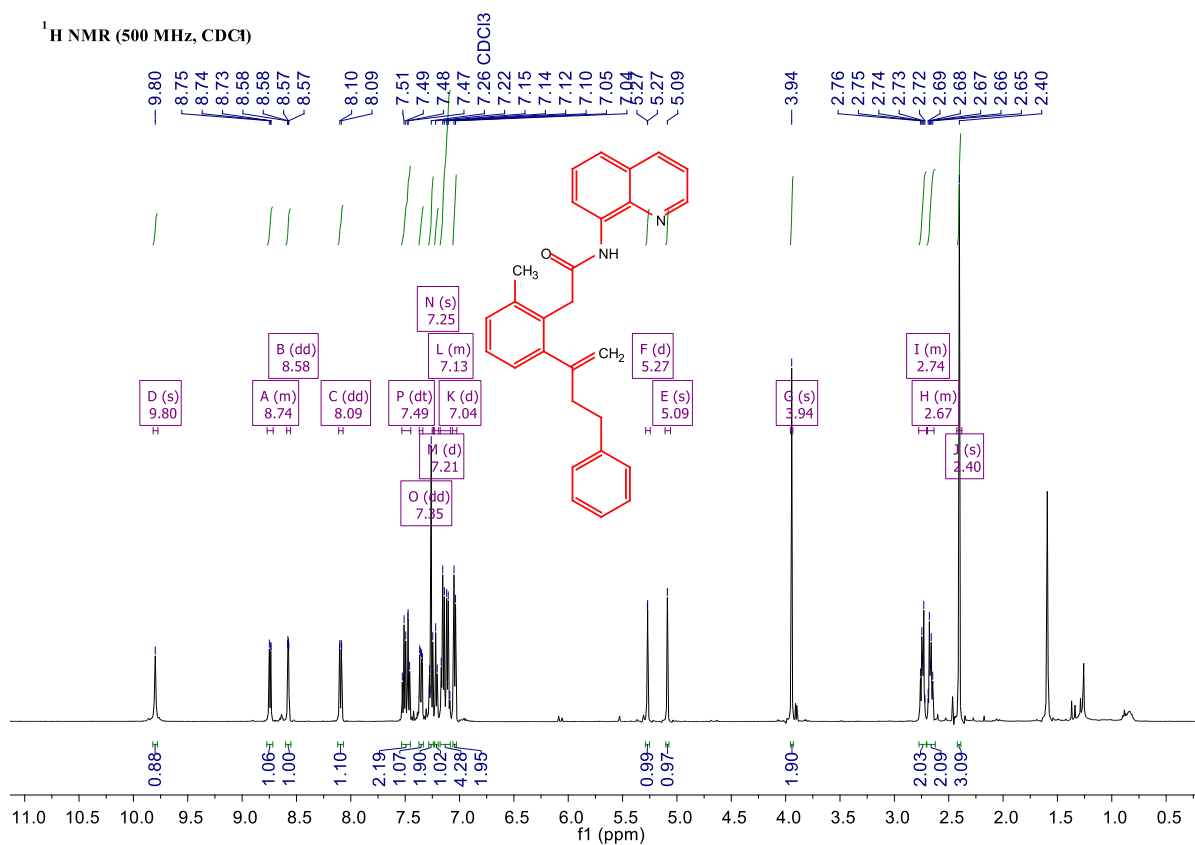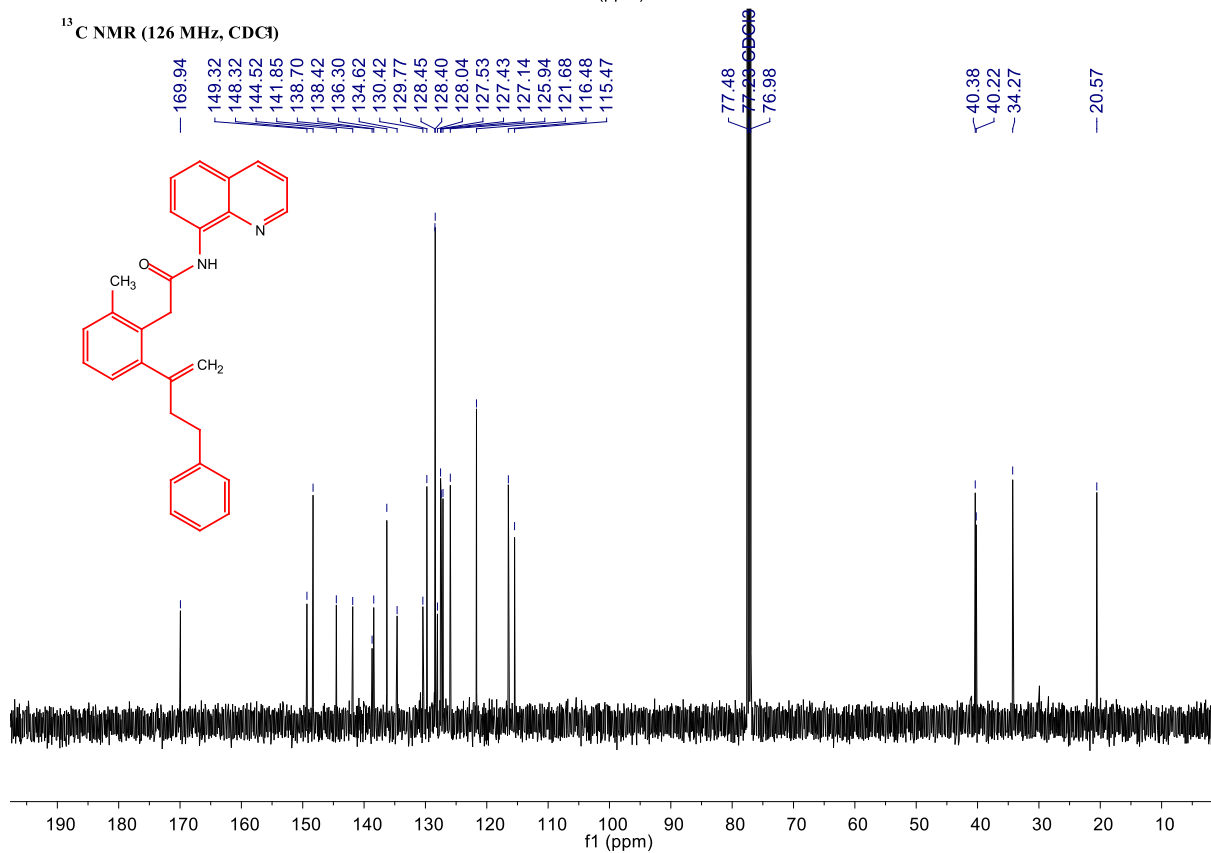

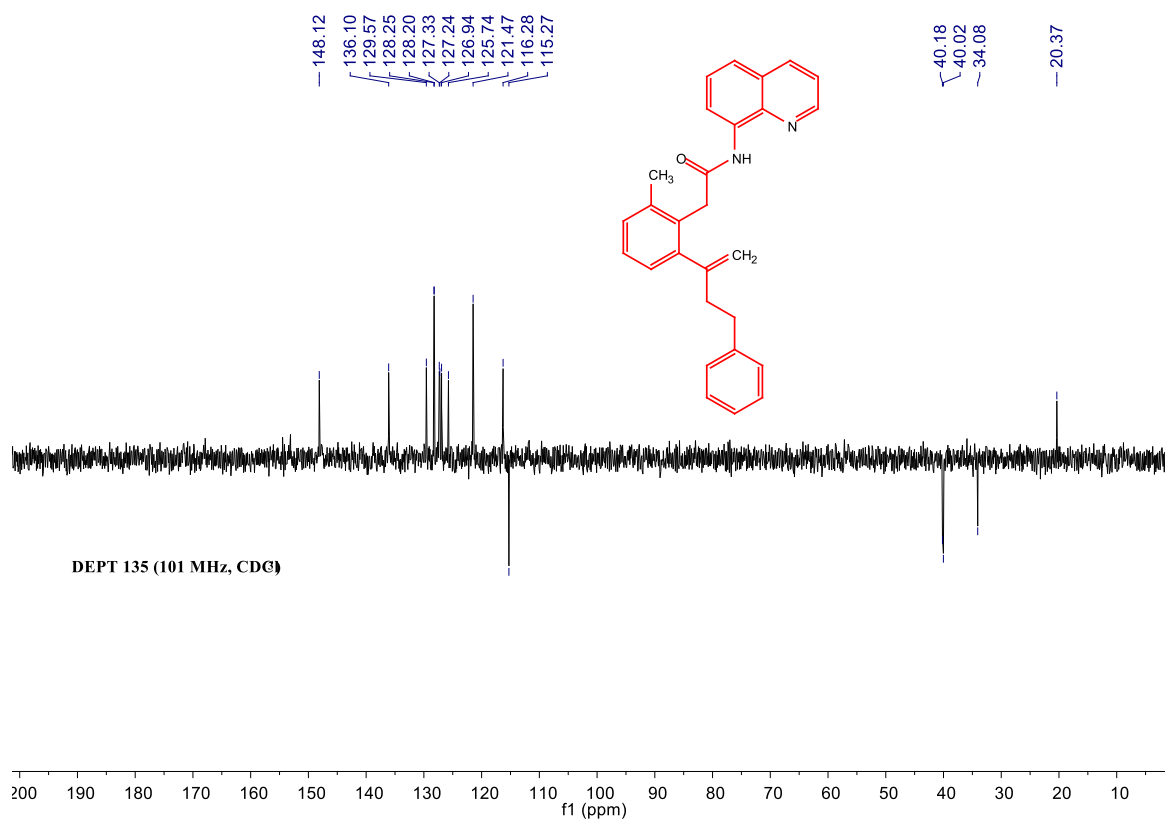

**Scheme 2, entry 3s:**

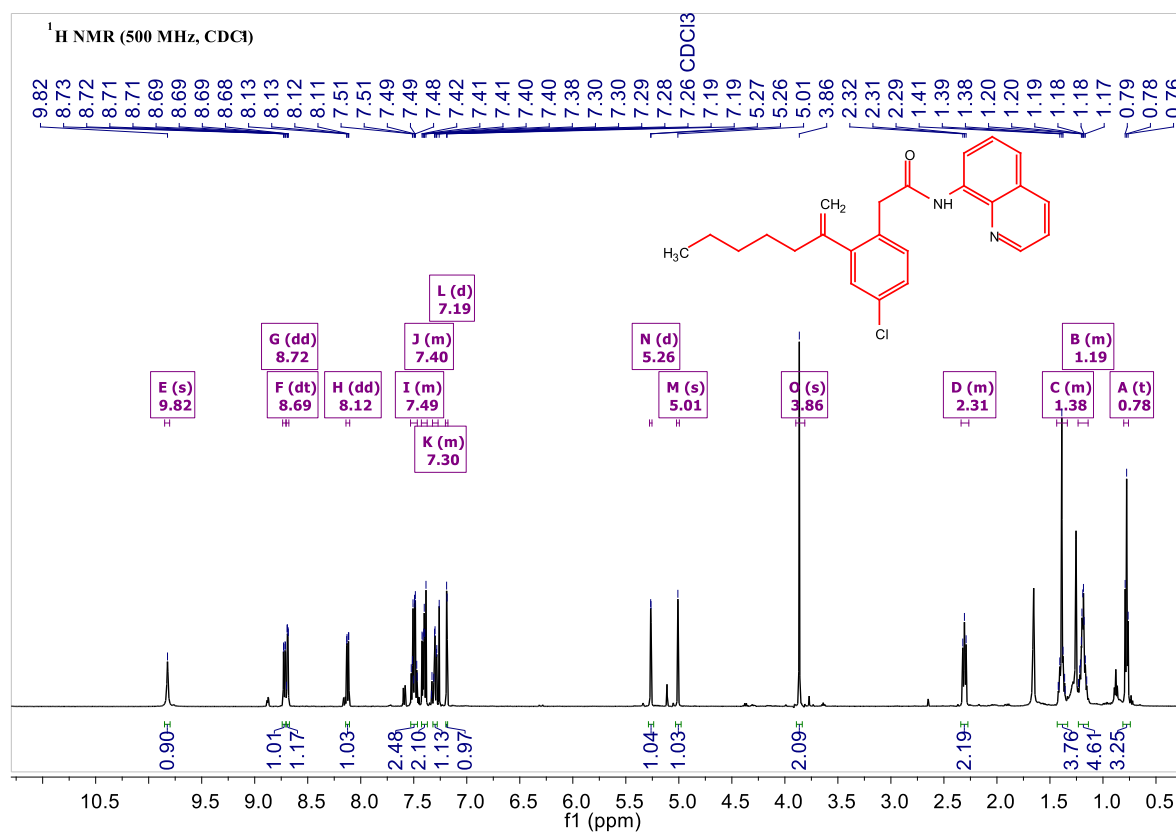

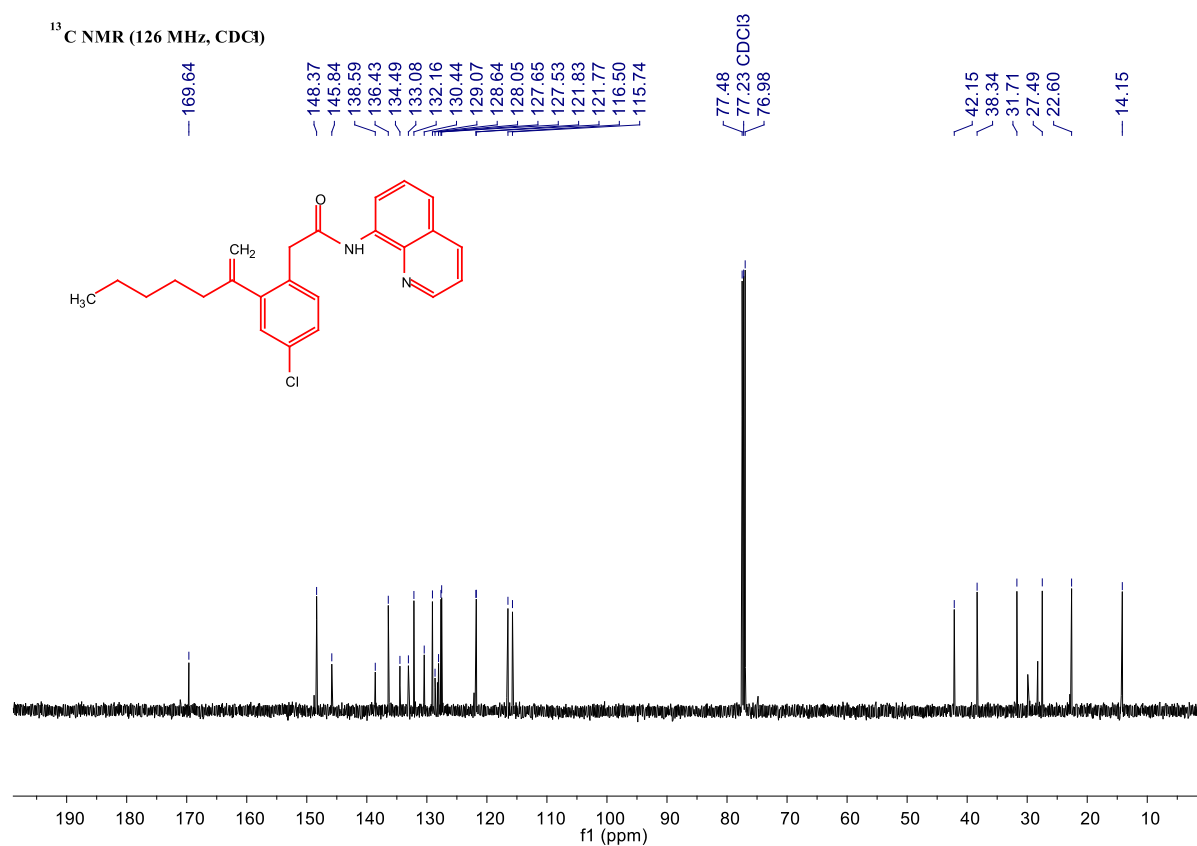

## Scheme 2, entry 3t:

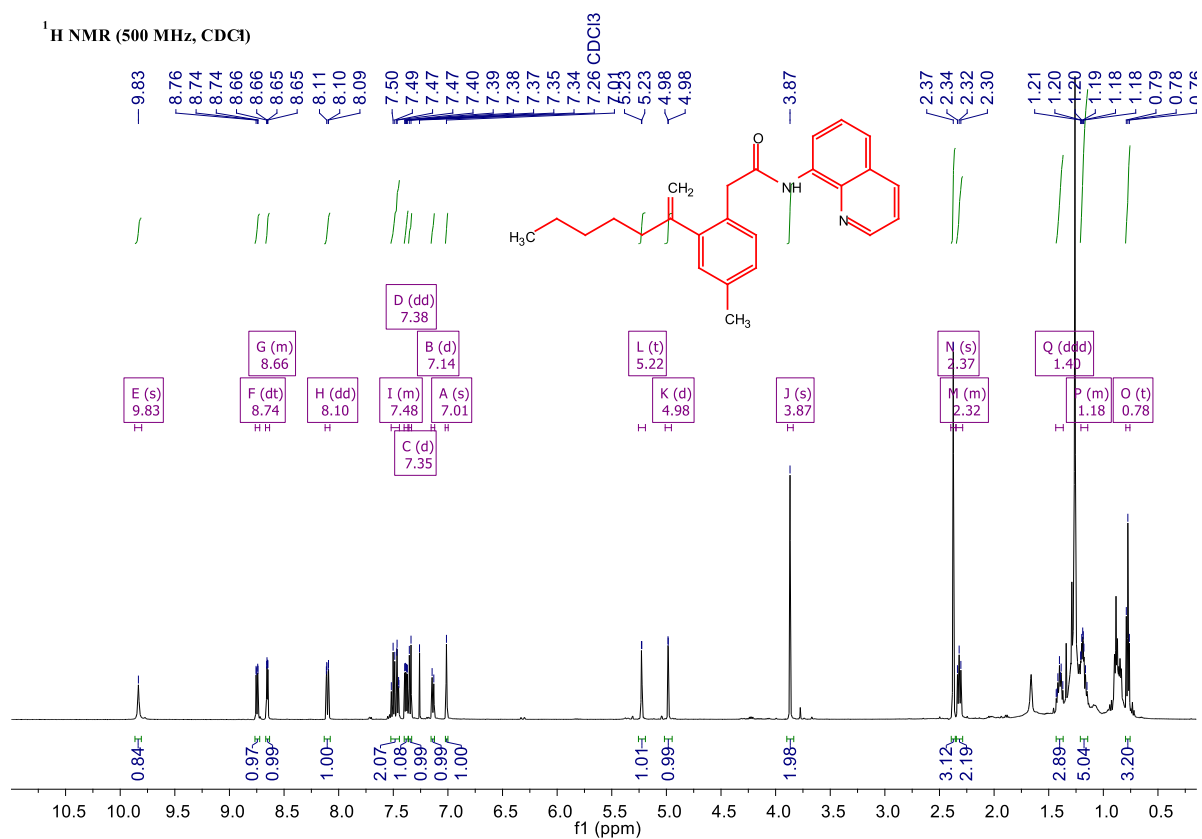

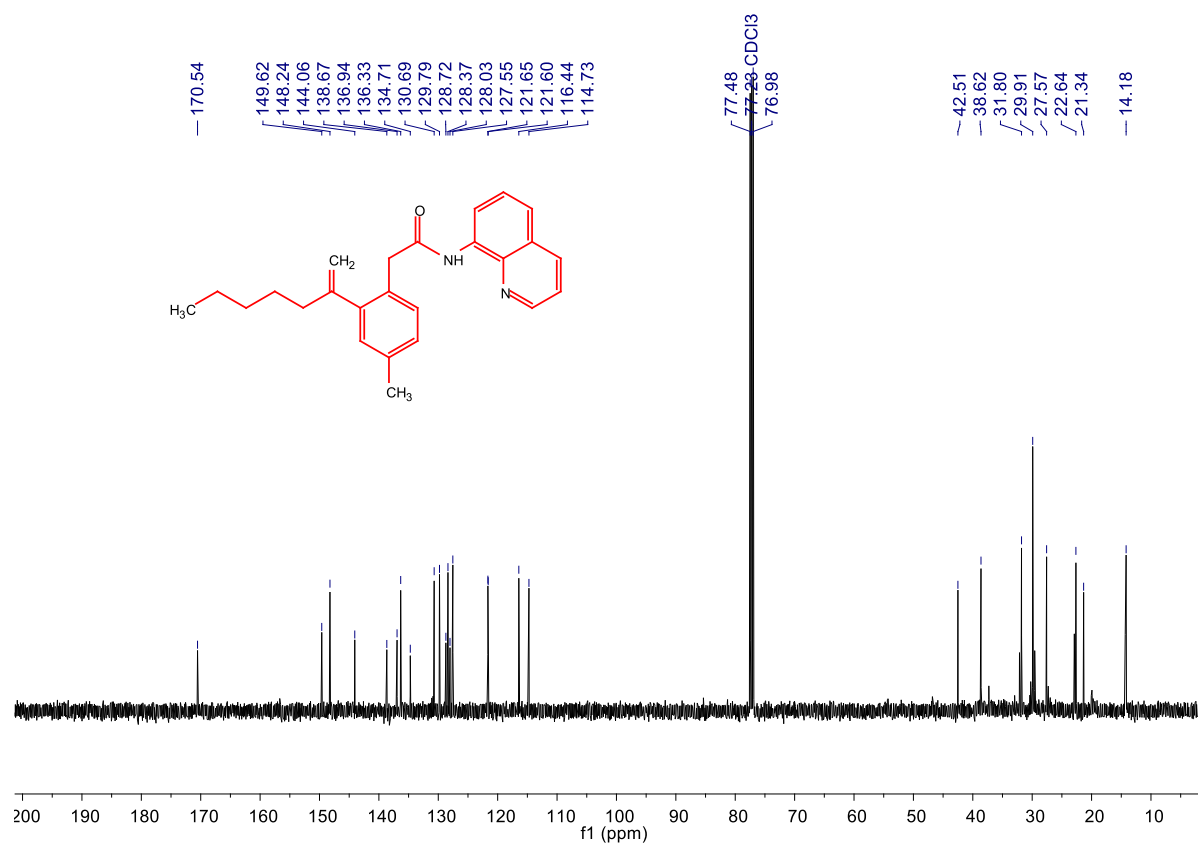

**Scheme 2, entry 3u:**

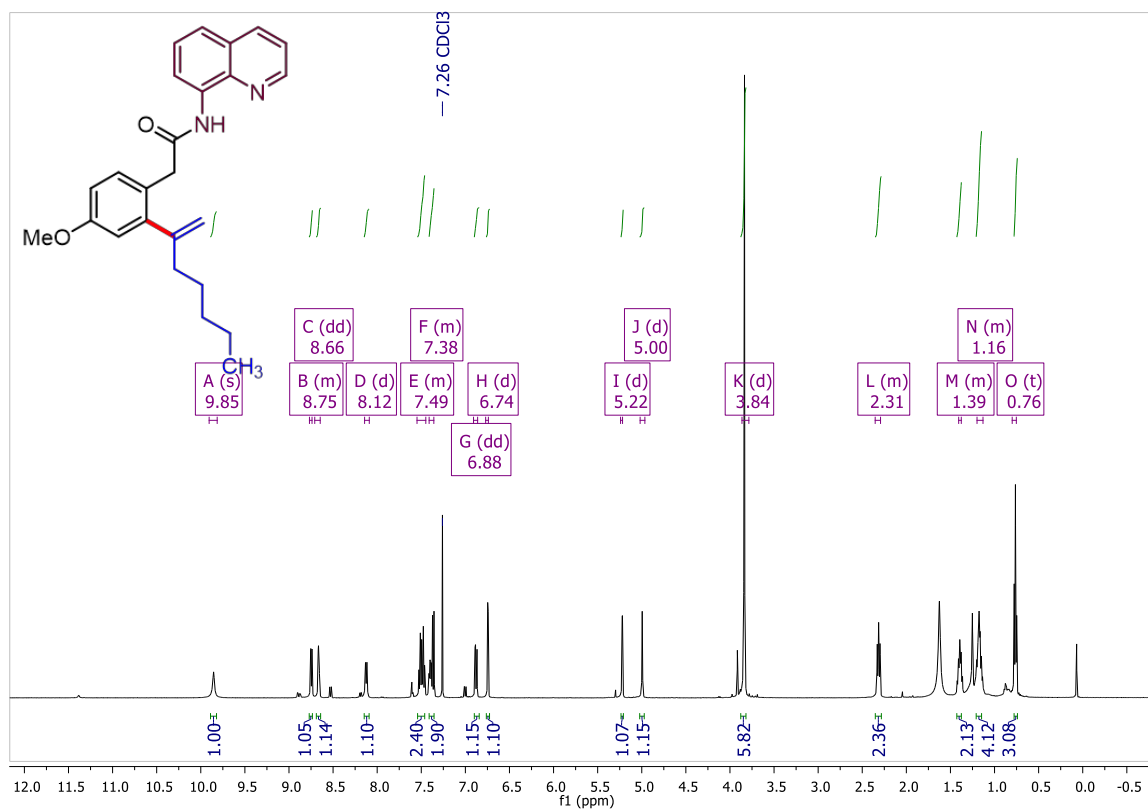

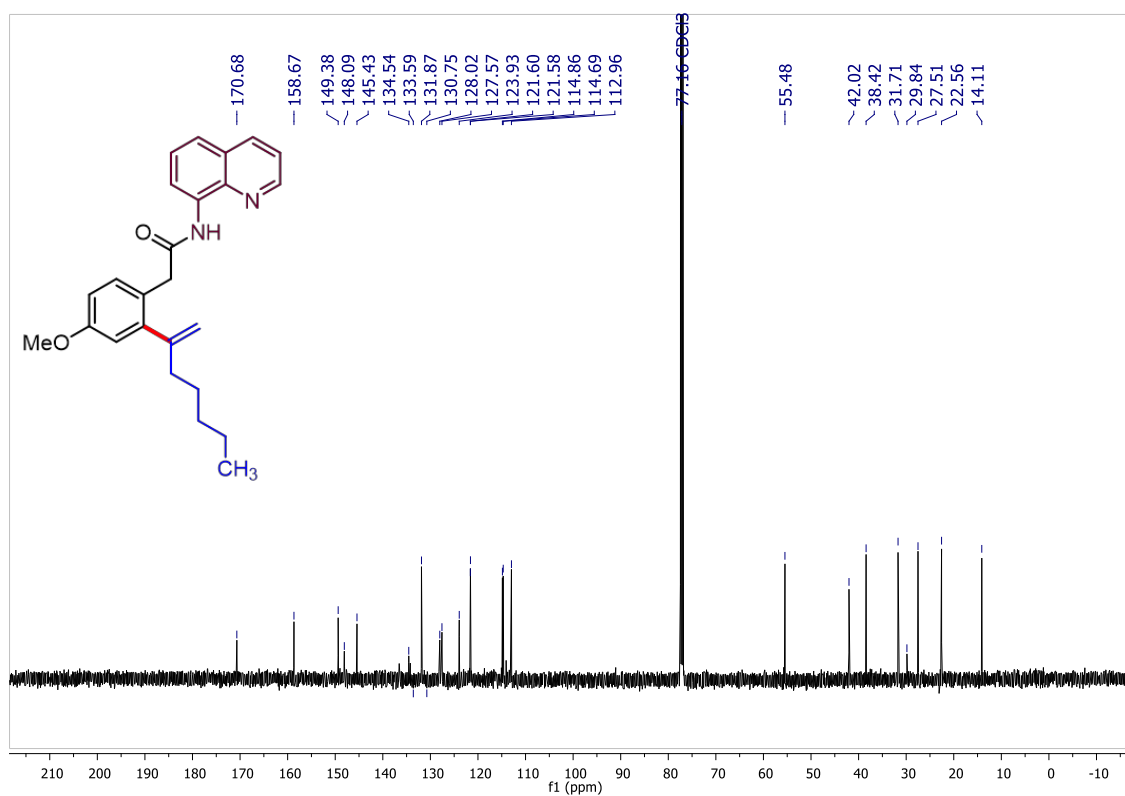

**Scheme 2, entry 3v:**

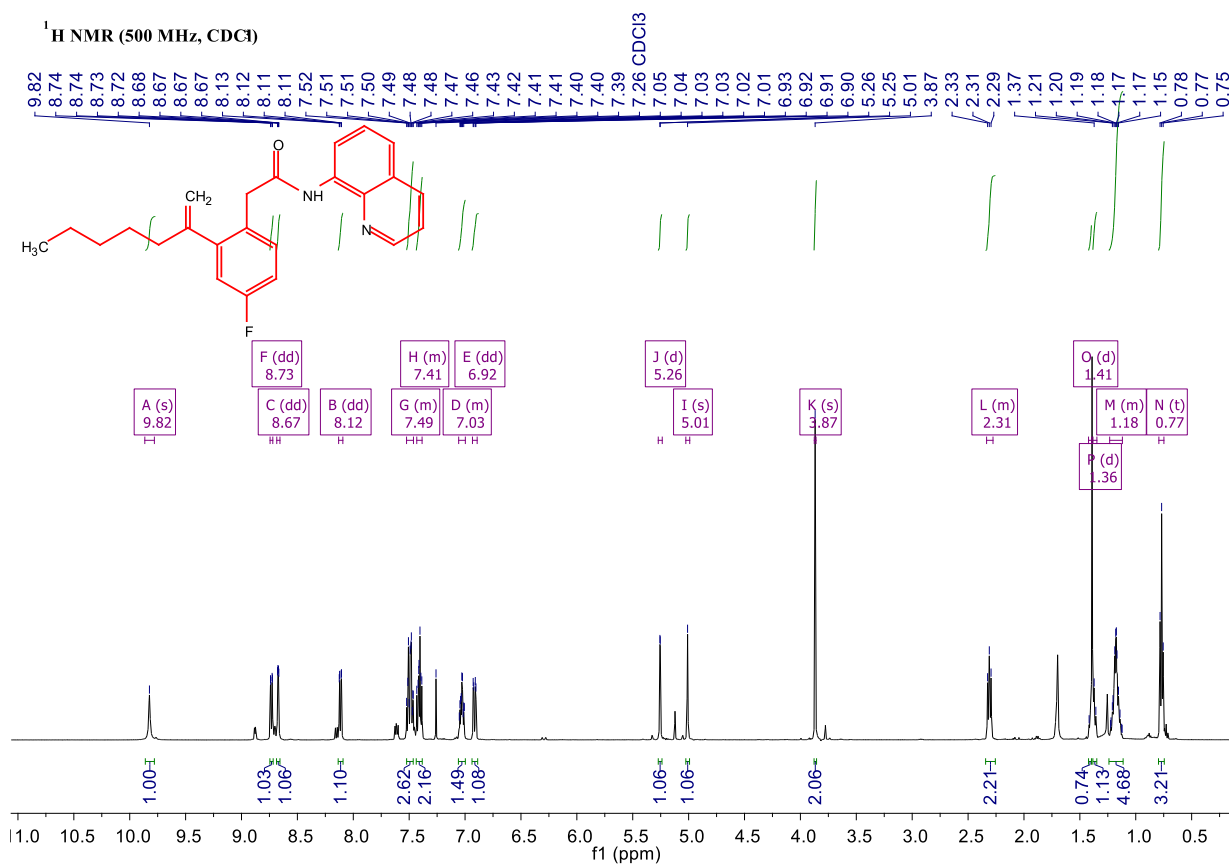



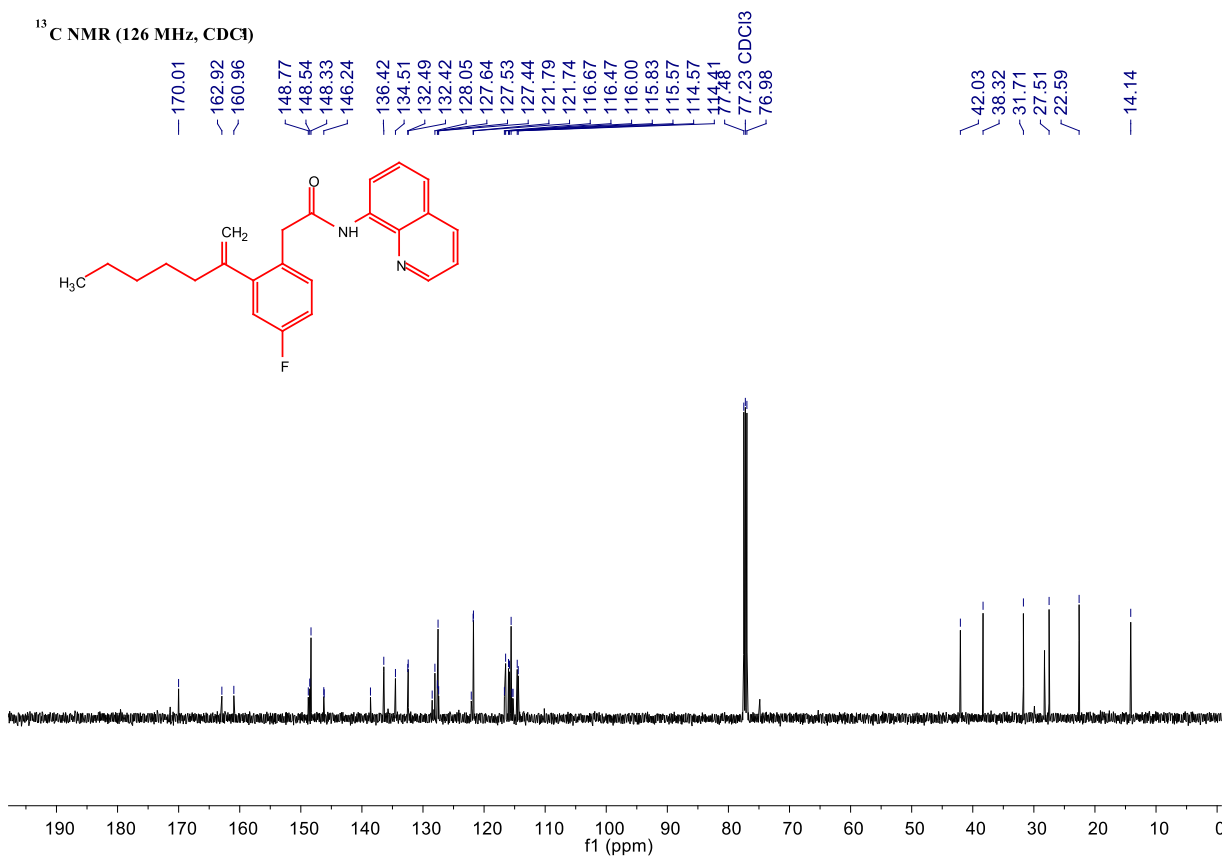

**Scheme 2, entry 3w:**

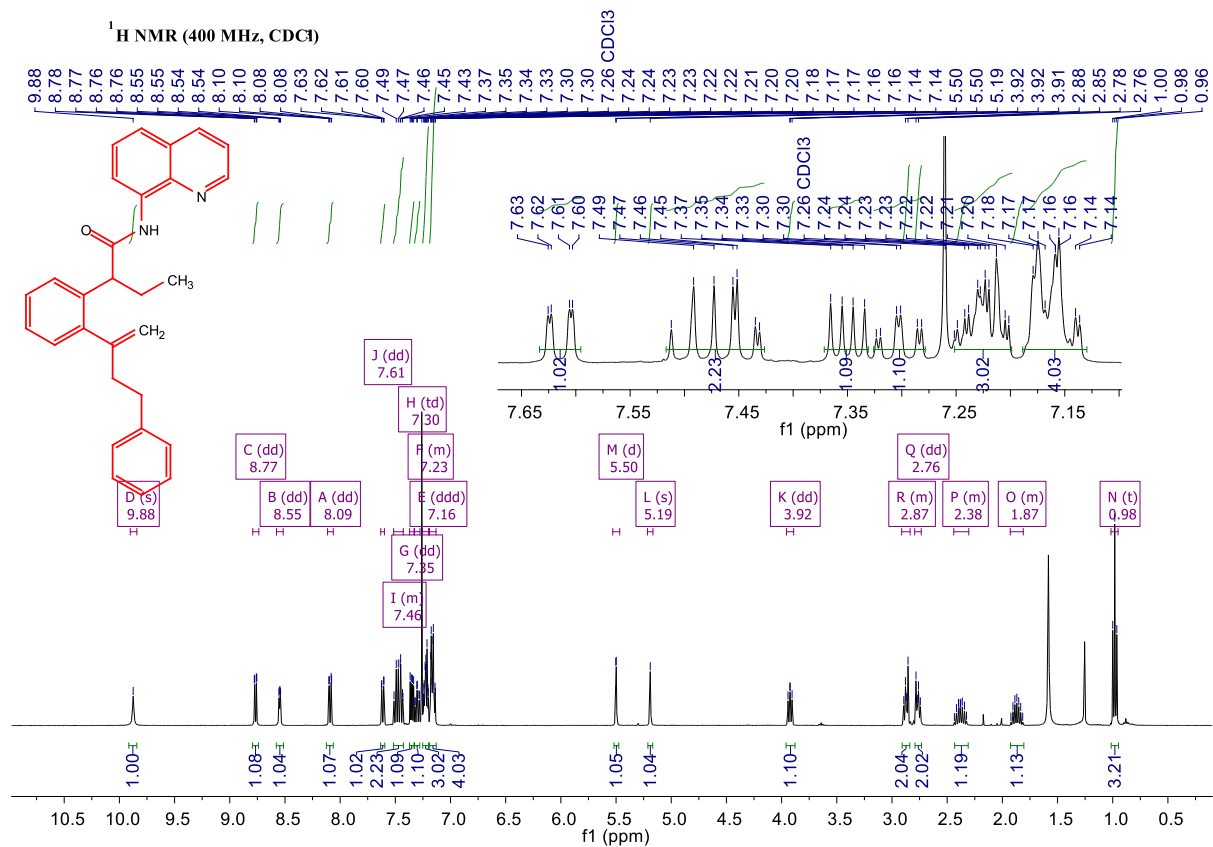

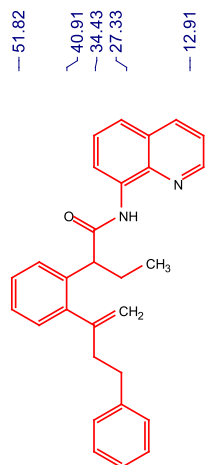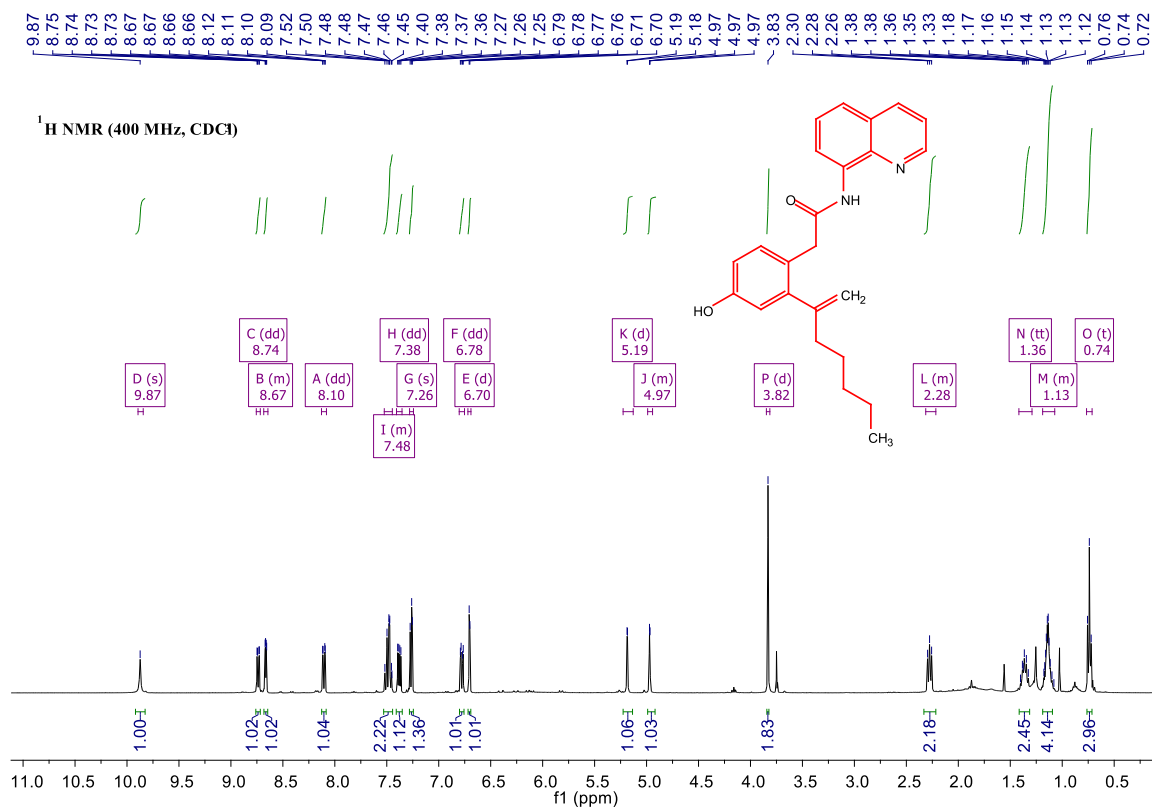

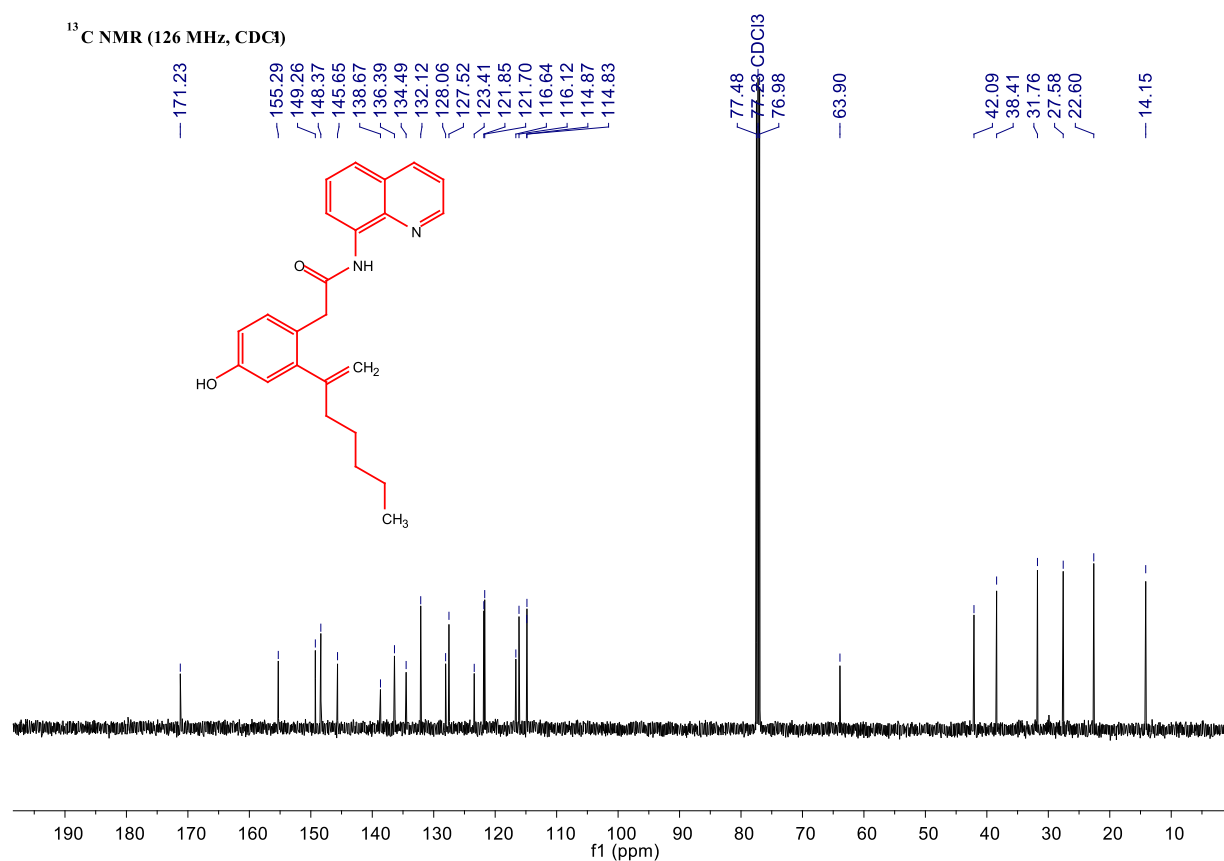

**Scheme 2, entry 3y:**

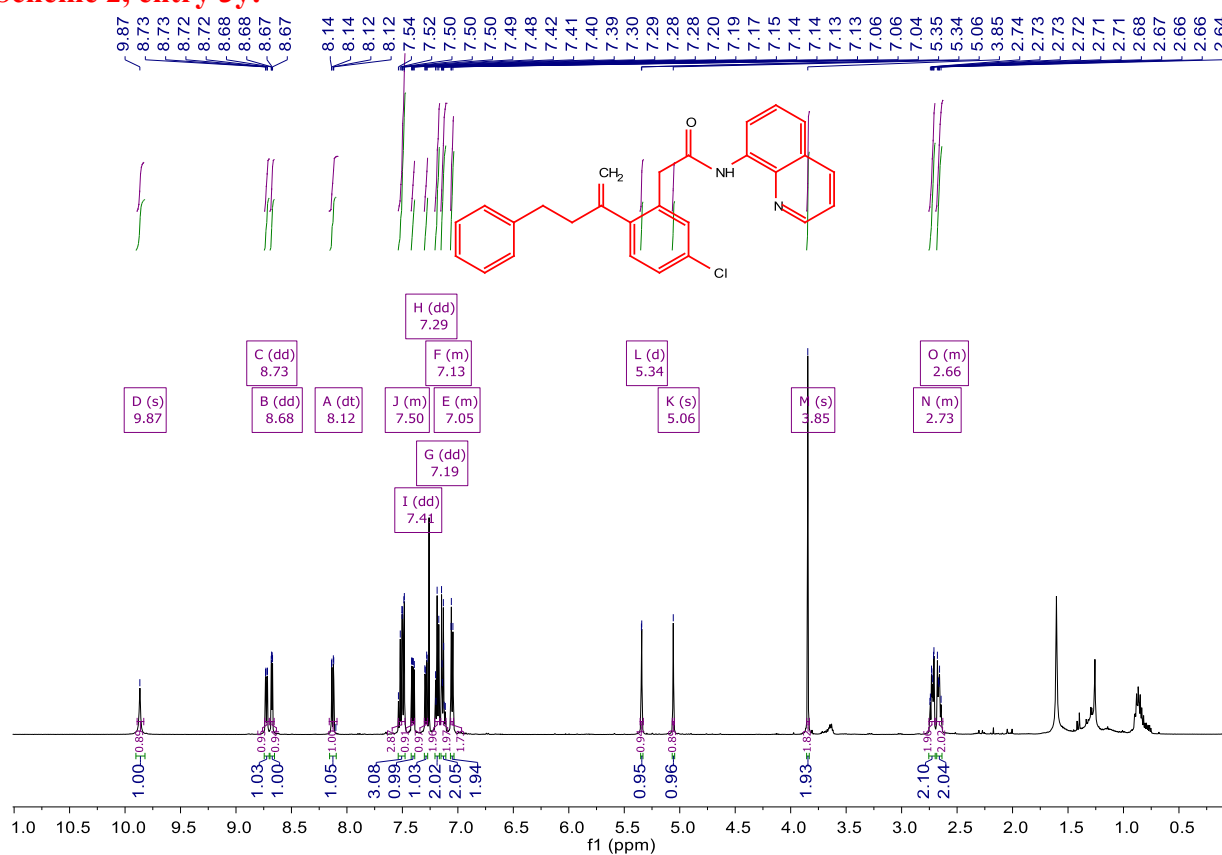

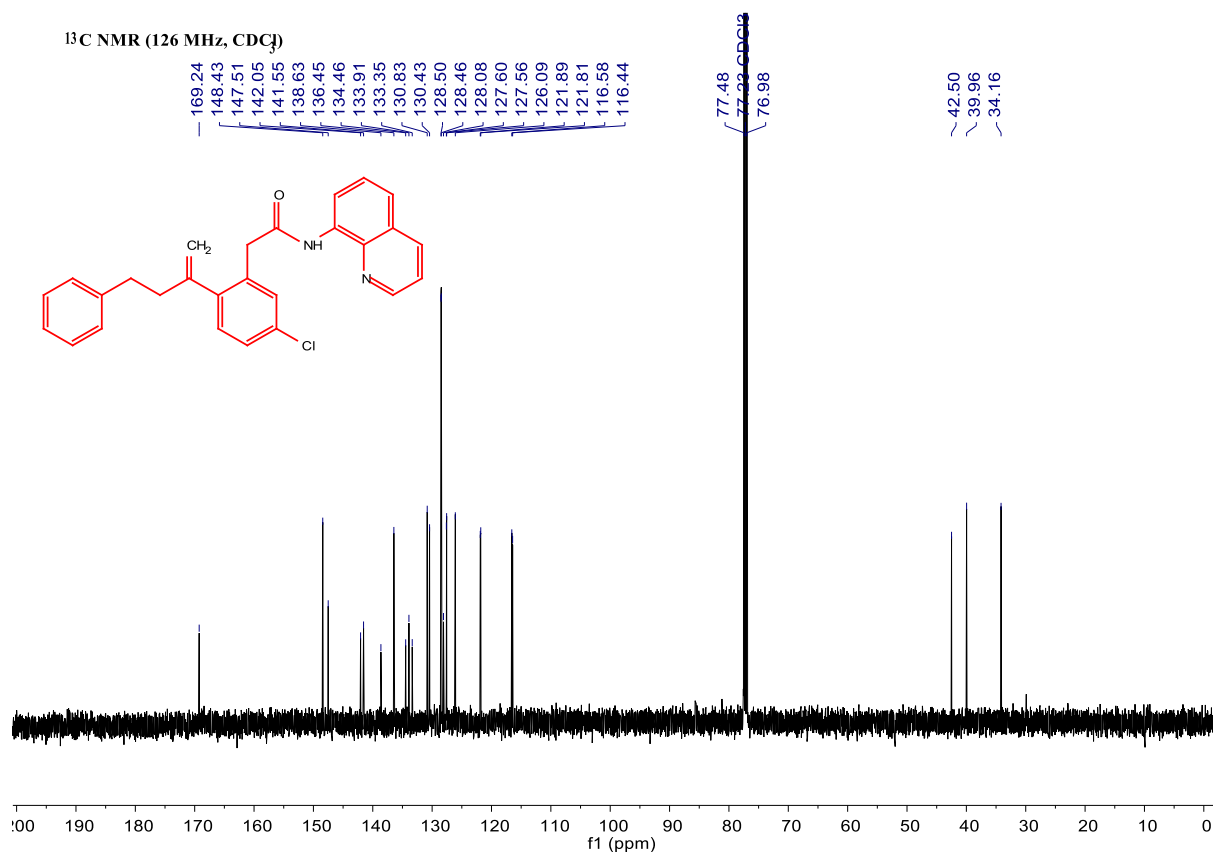

**Scheme 2, entry 3z:**

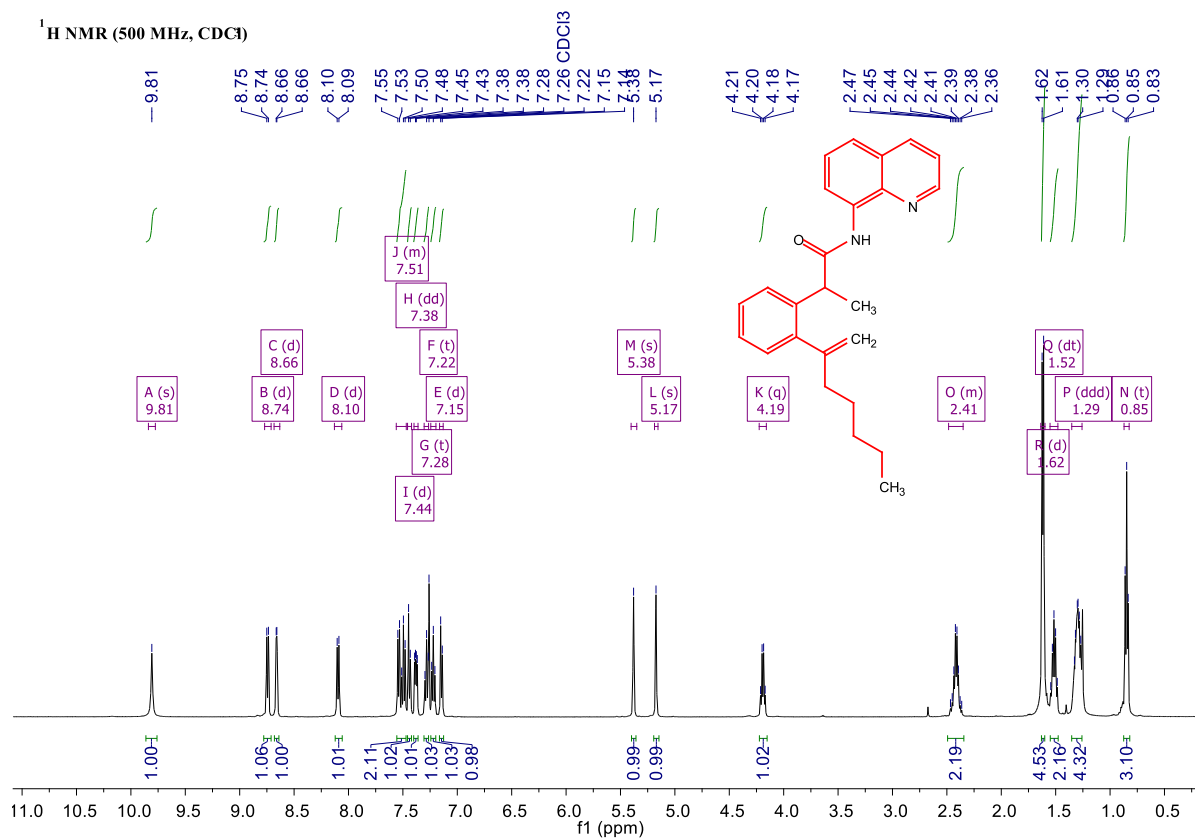

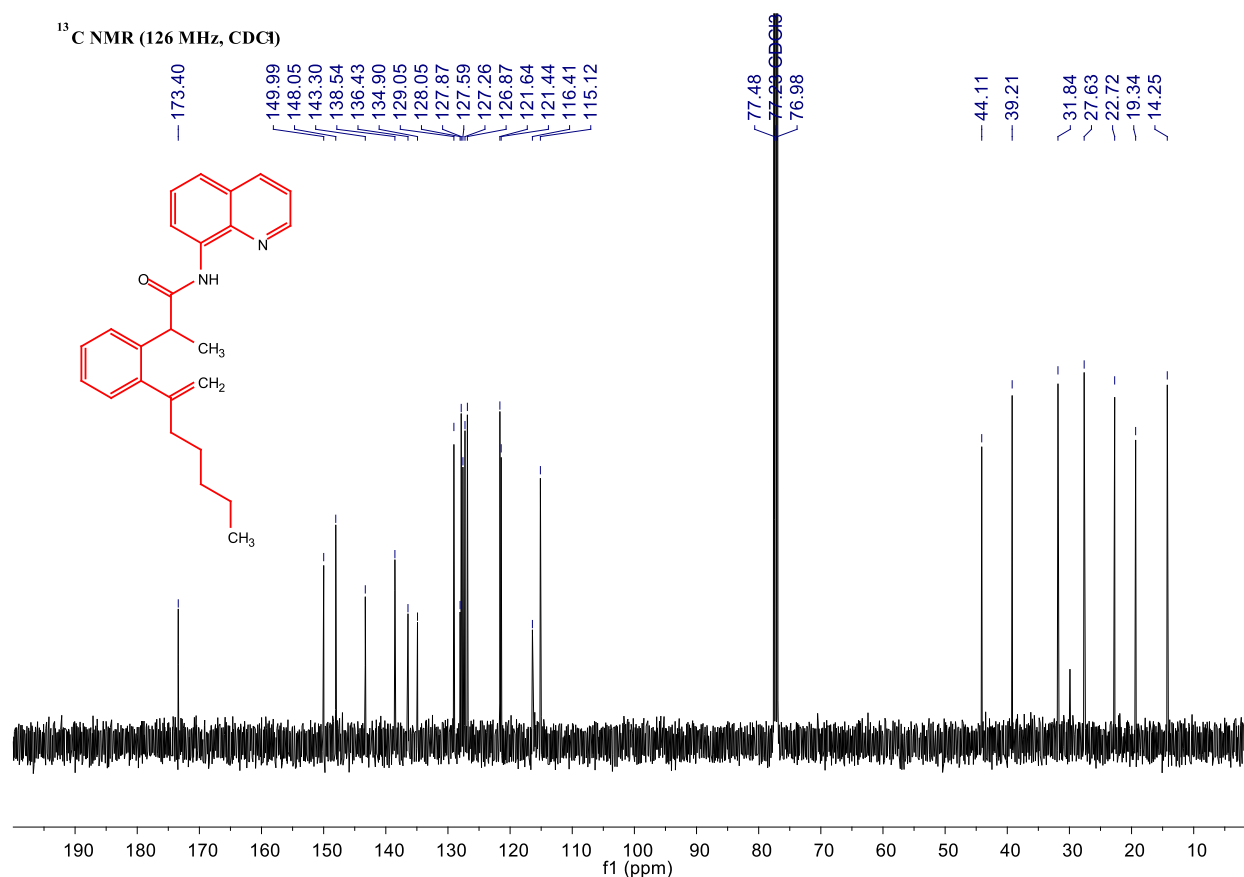

**Scheme 2, entry 3aa:**

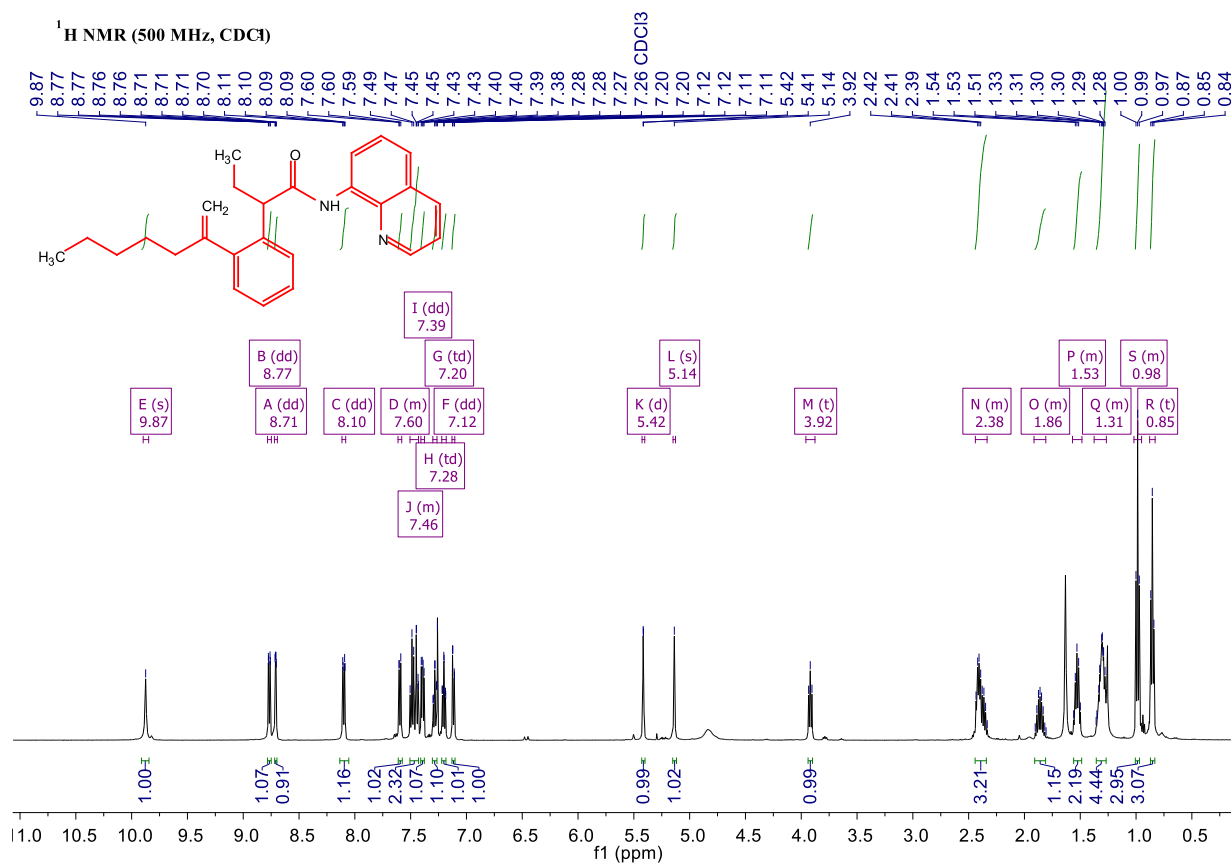



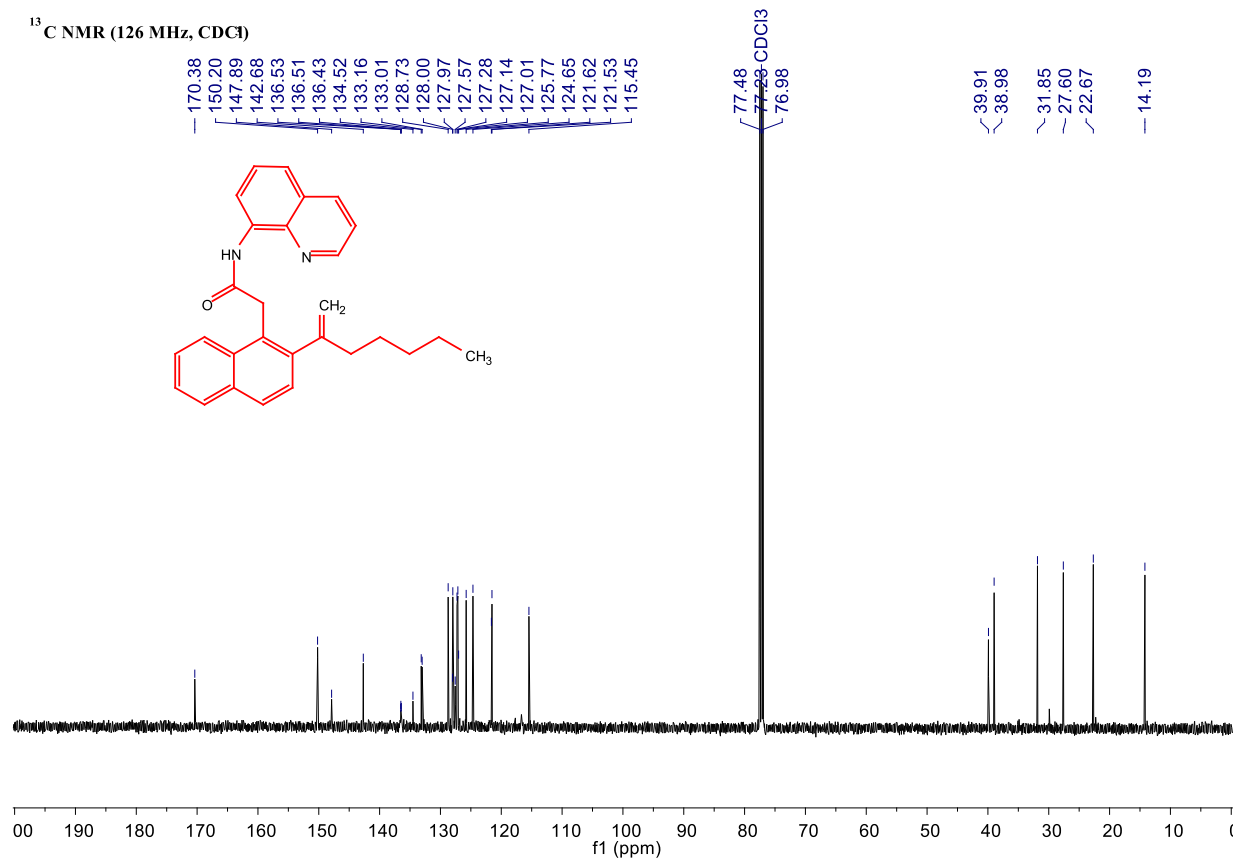

**Scheme 2, entry 3ac:**

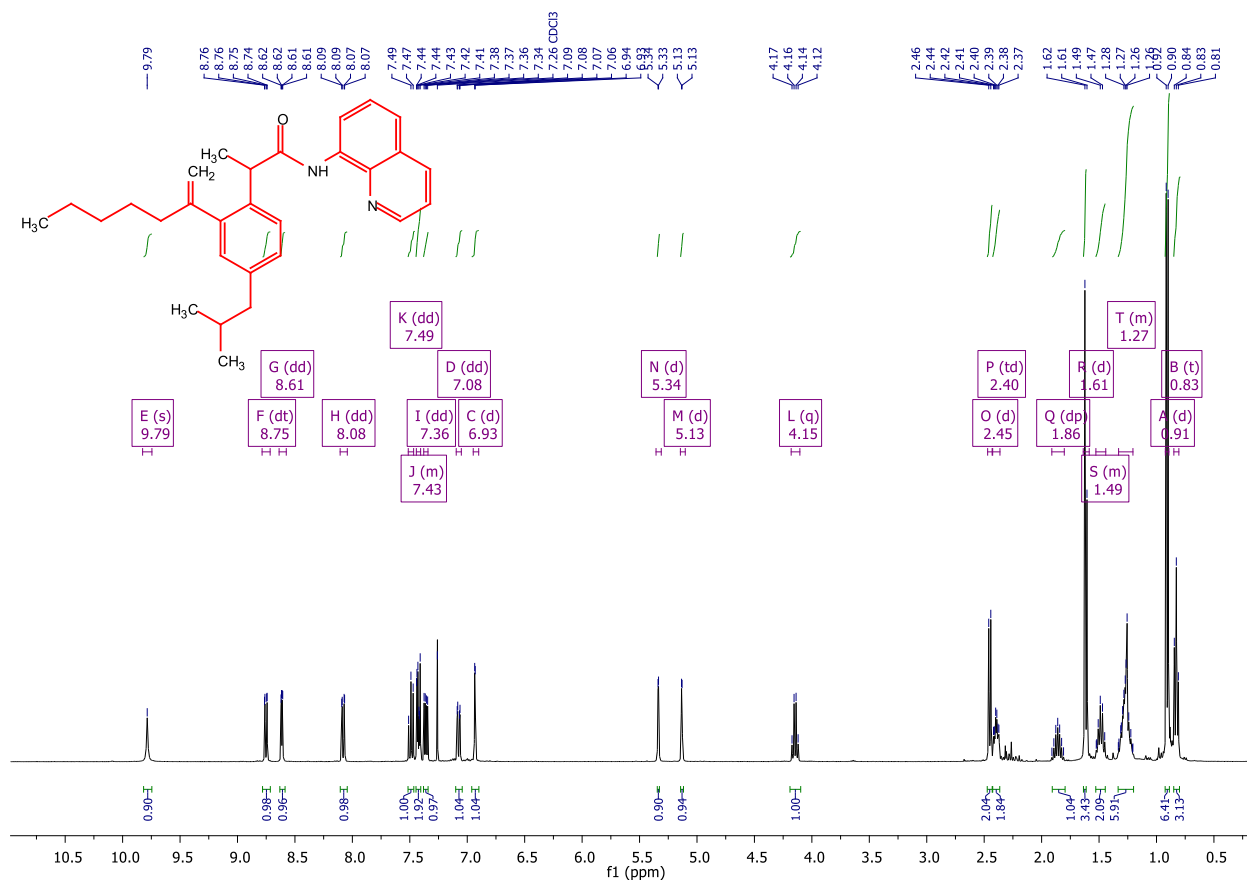

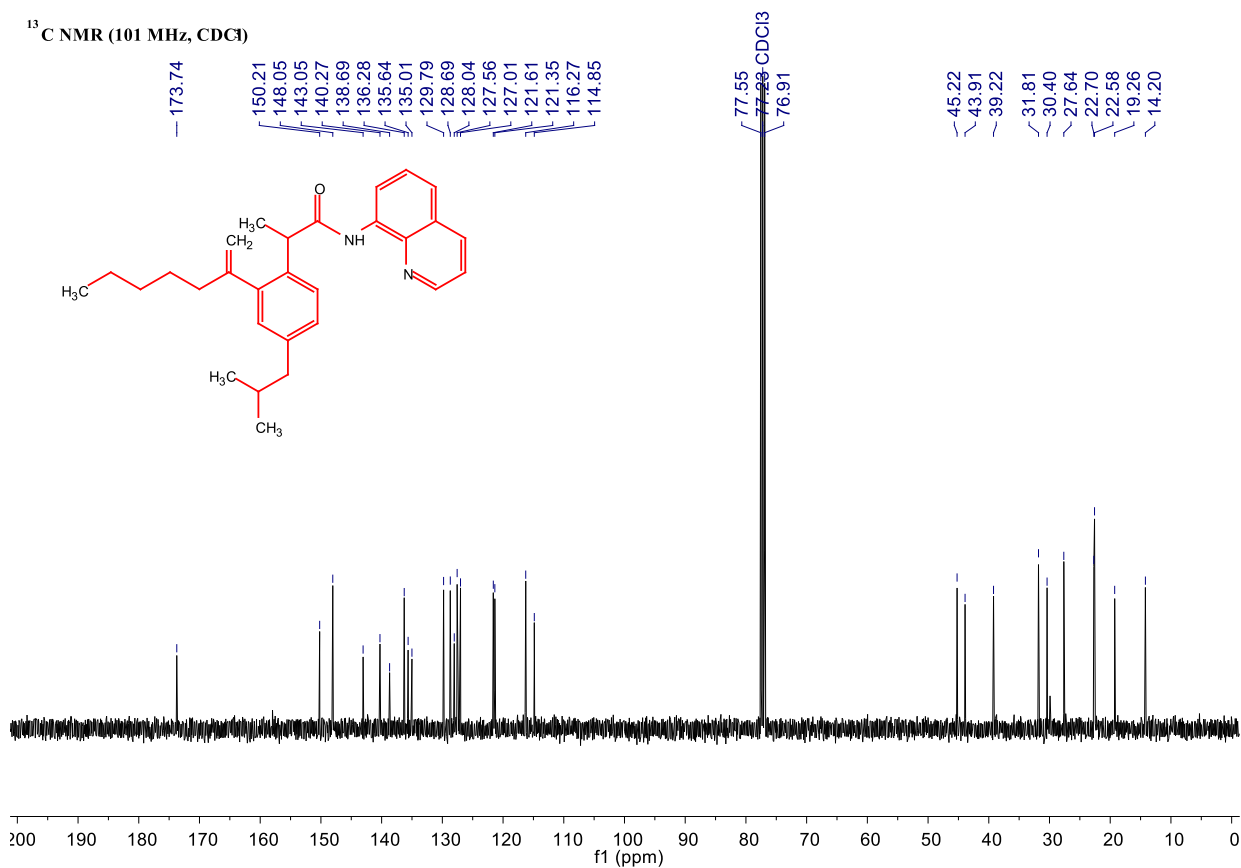

**Scheme 2, entry 3ad:**

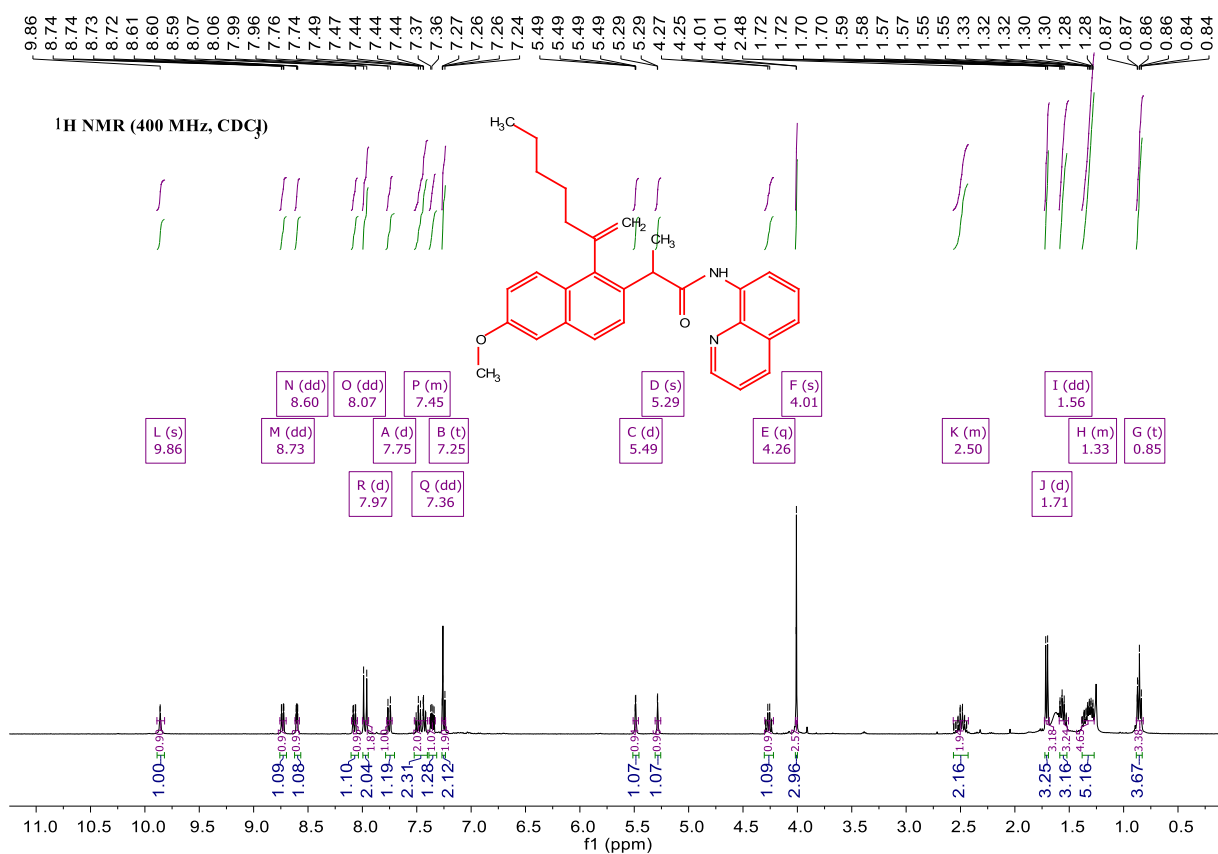



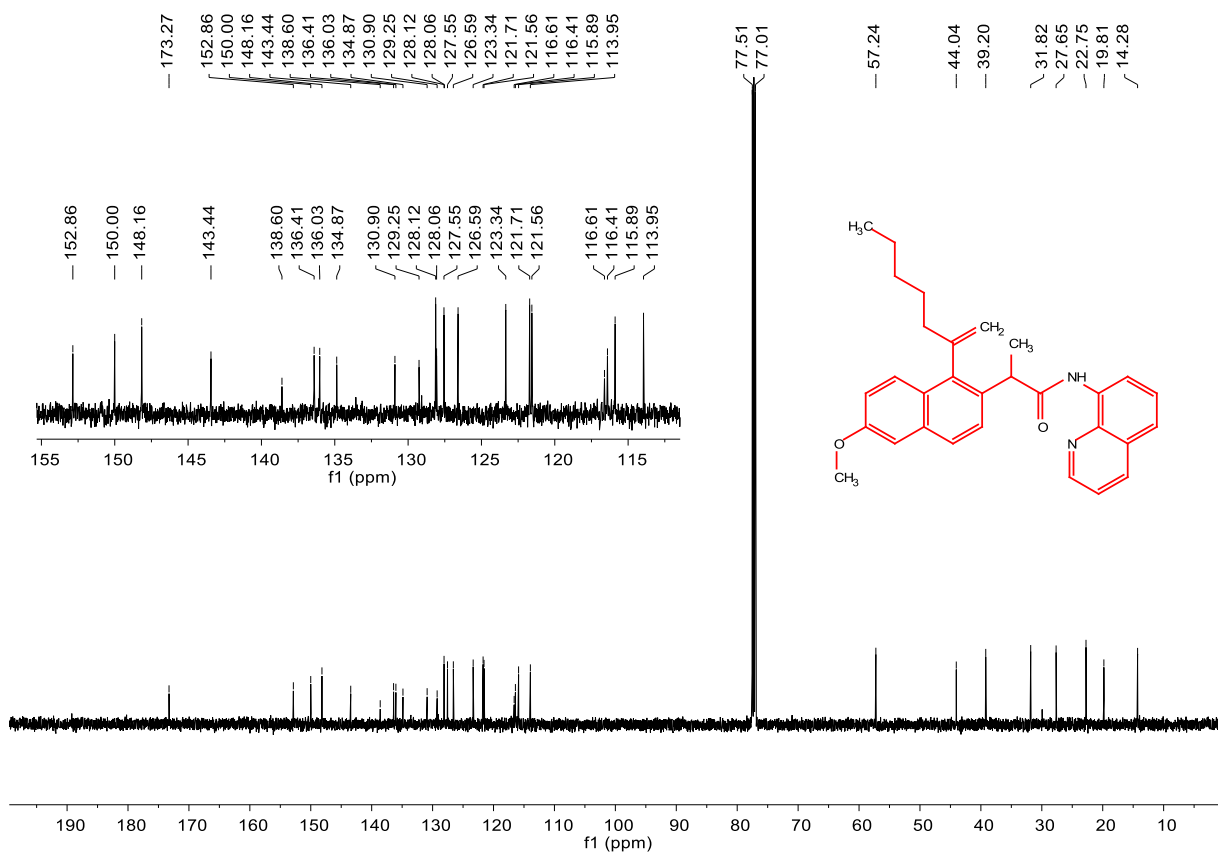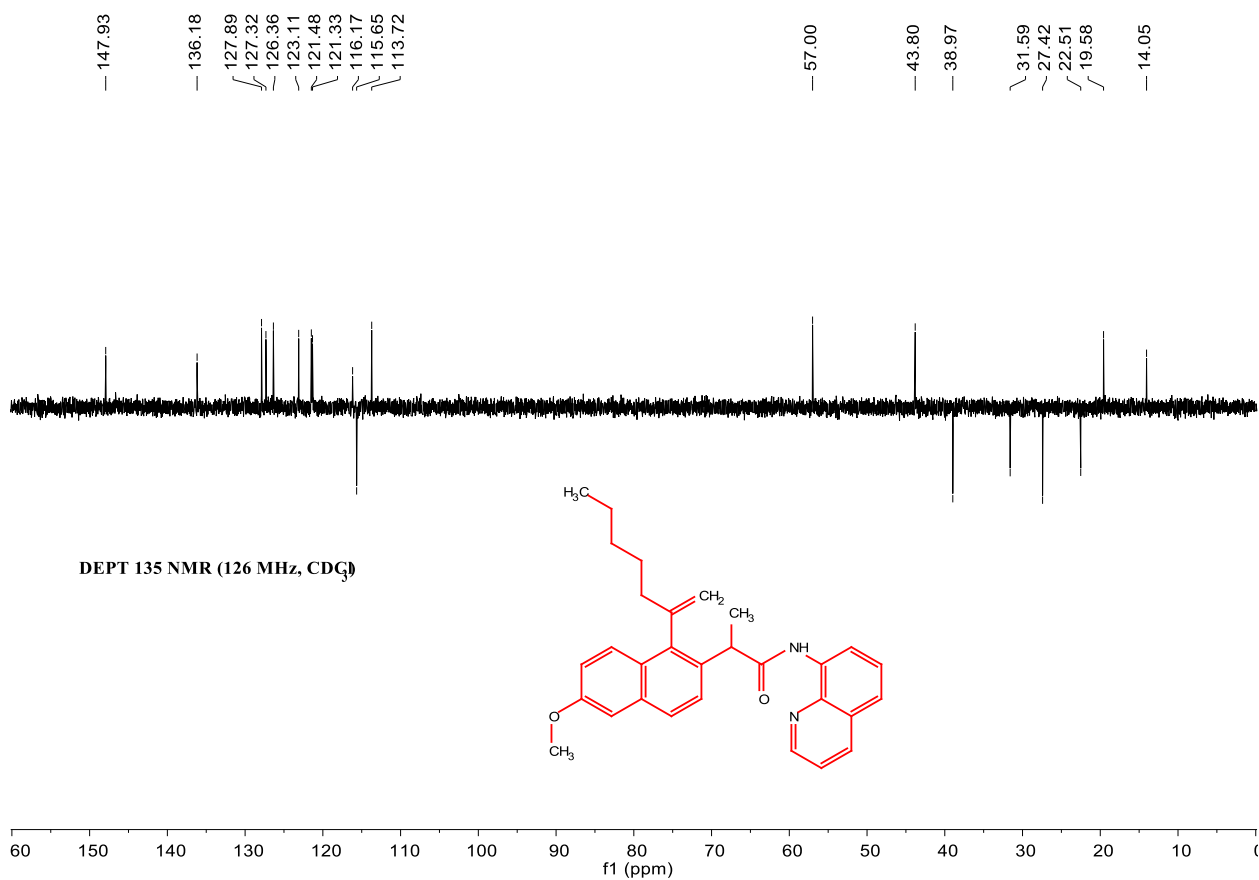

**Scheme 2, entry 3ae**

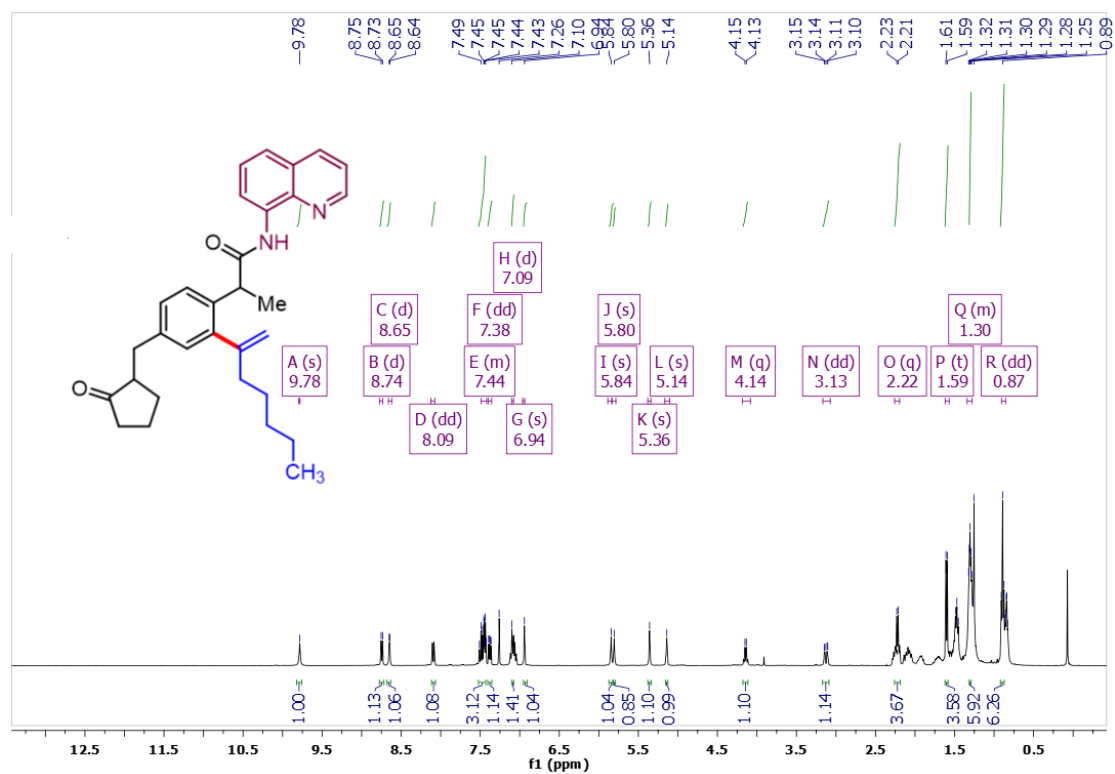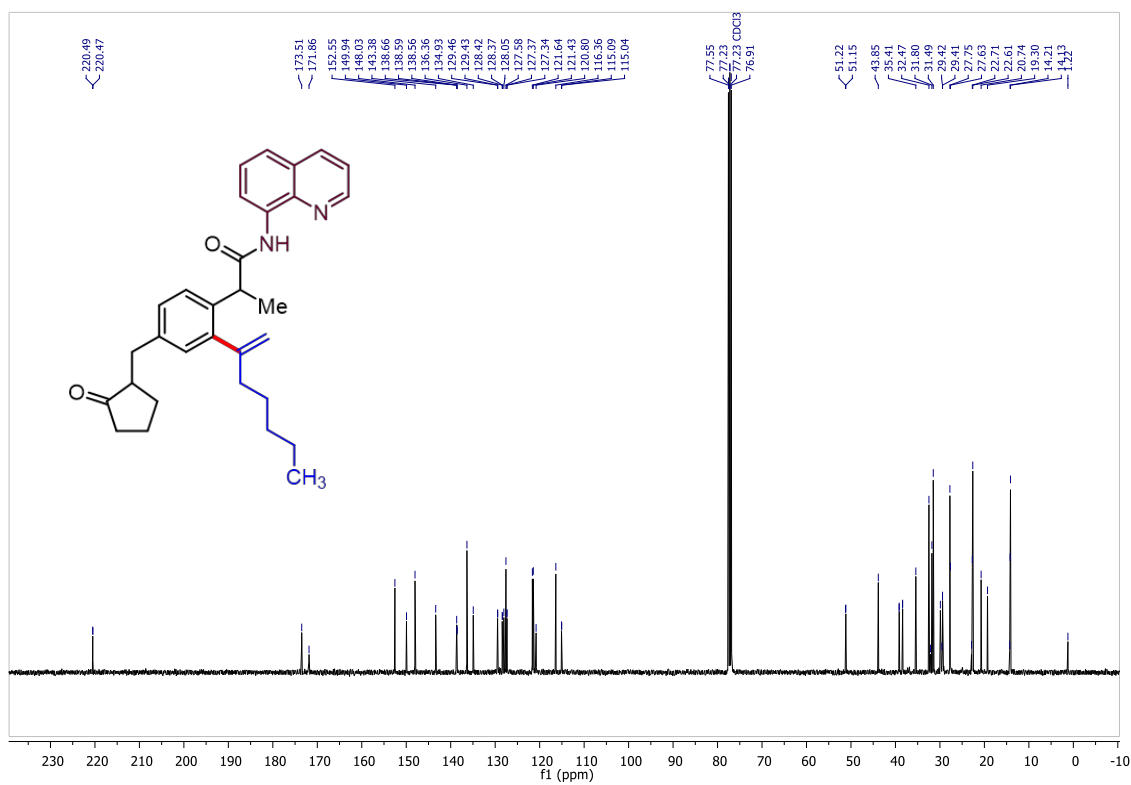

**Scheme 2, entry 3af**

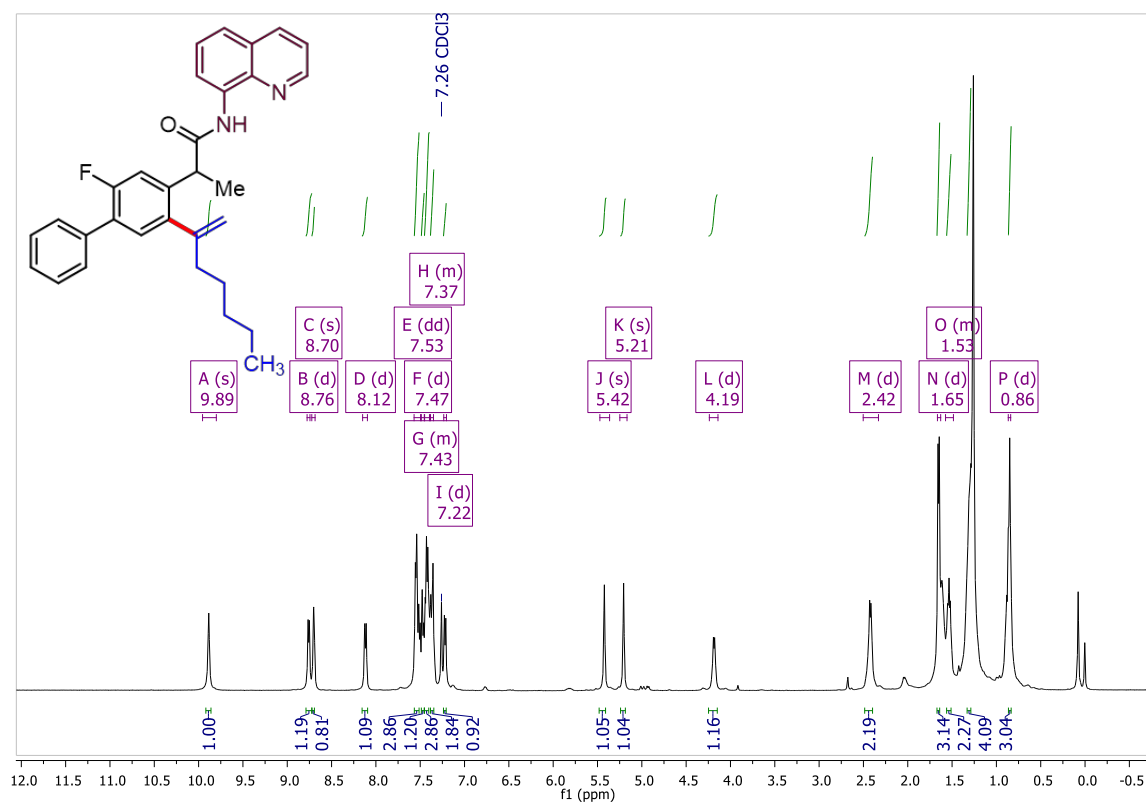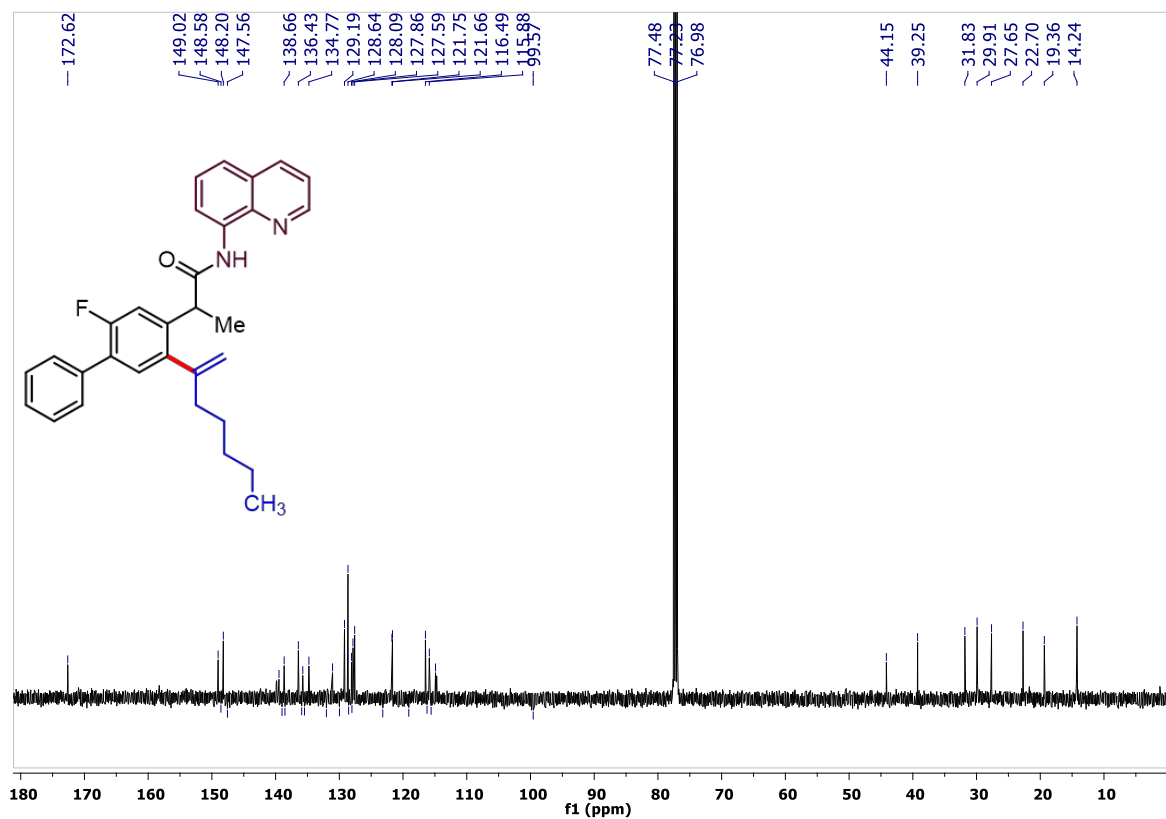

**Scheme 2, entry 3ag:**

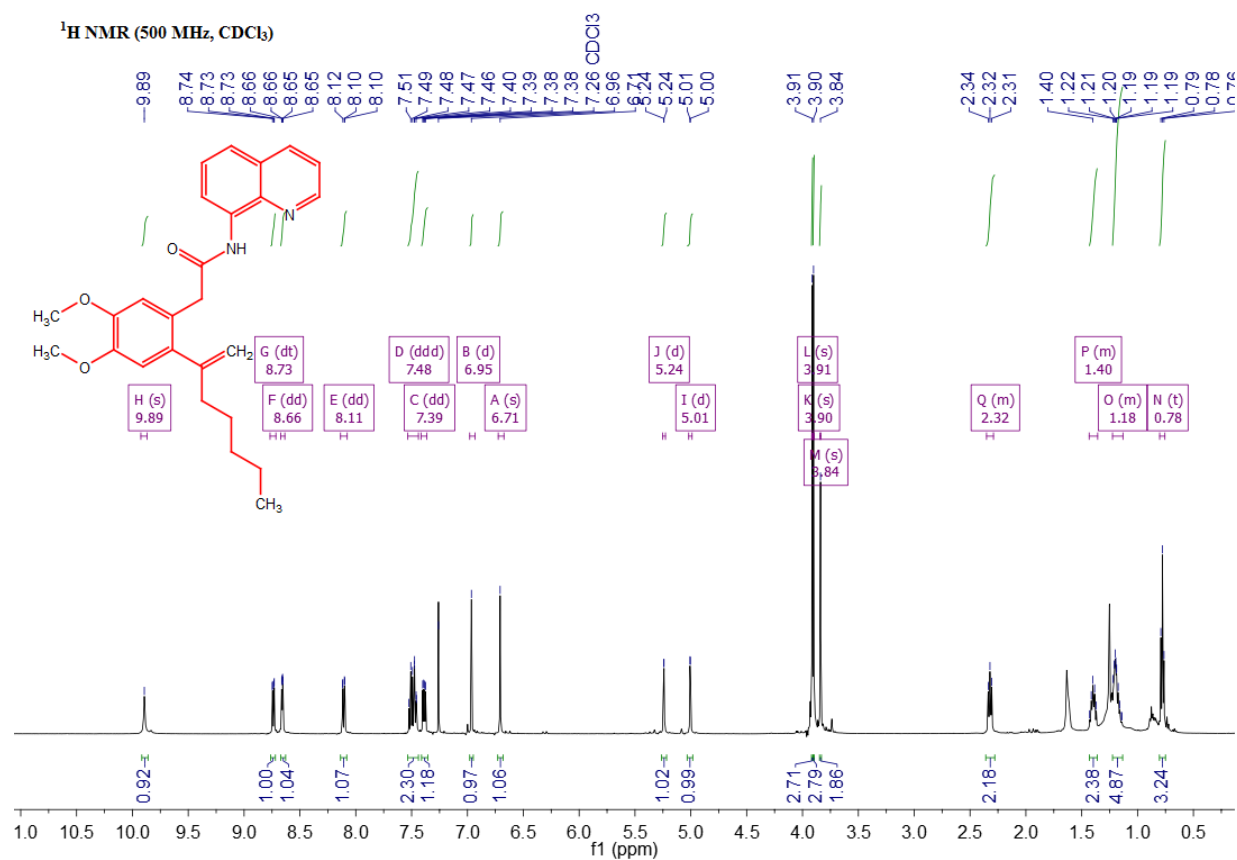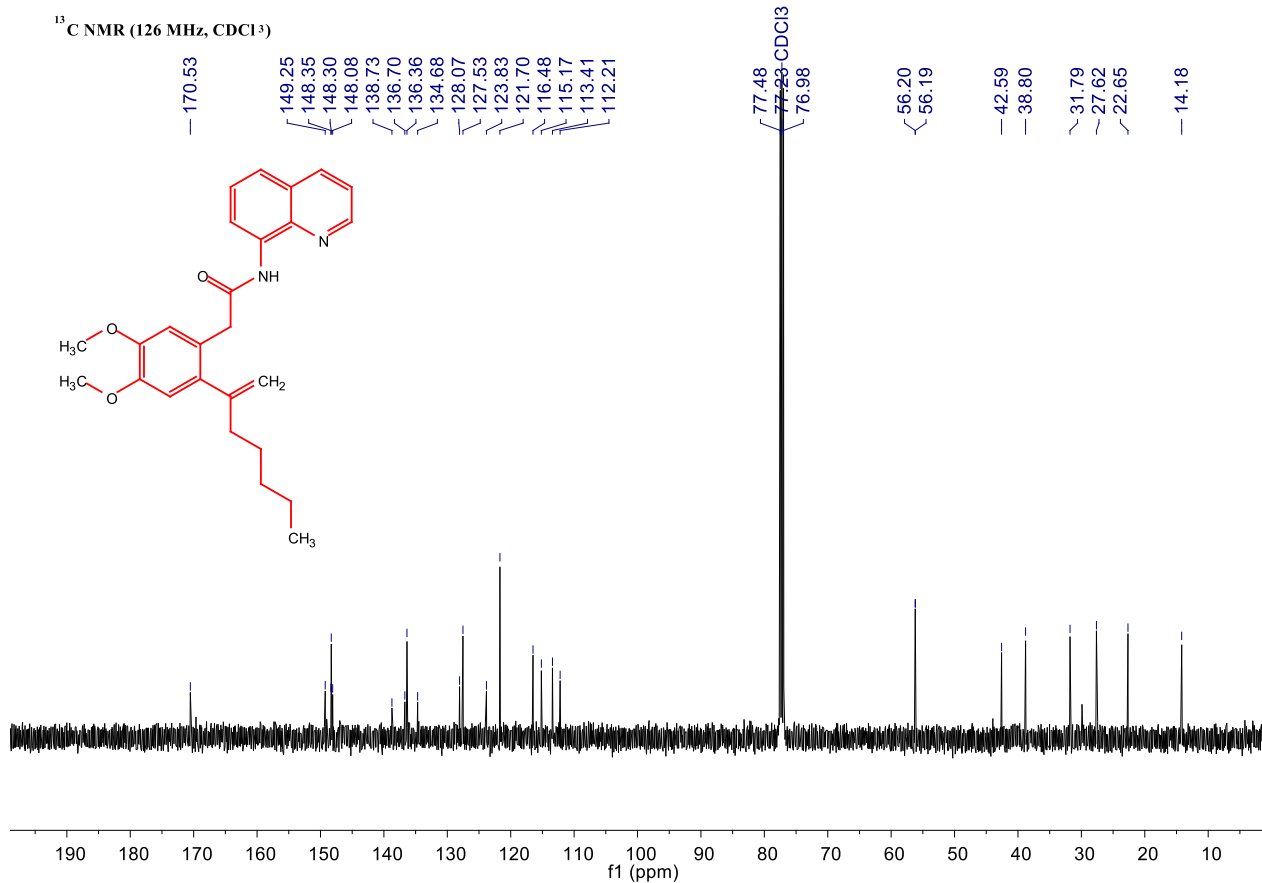

**Scheme 2, entry 3ah:**

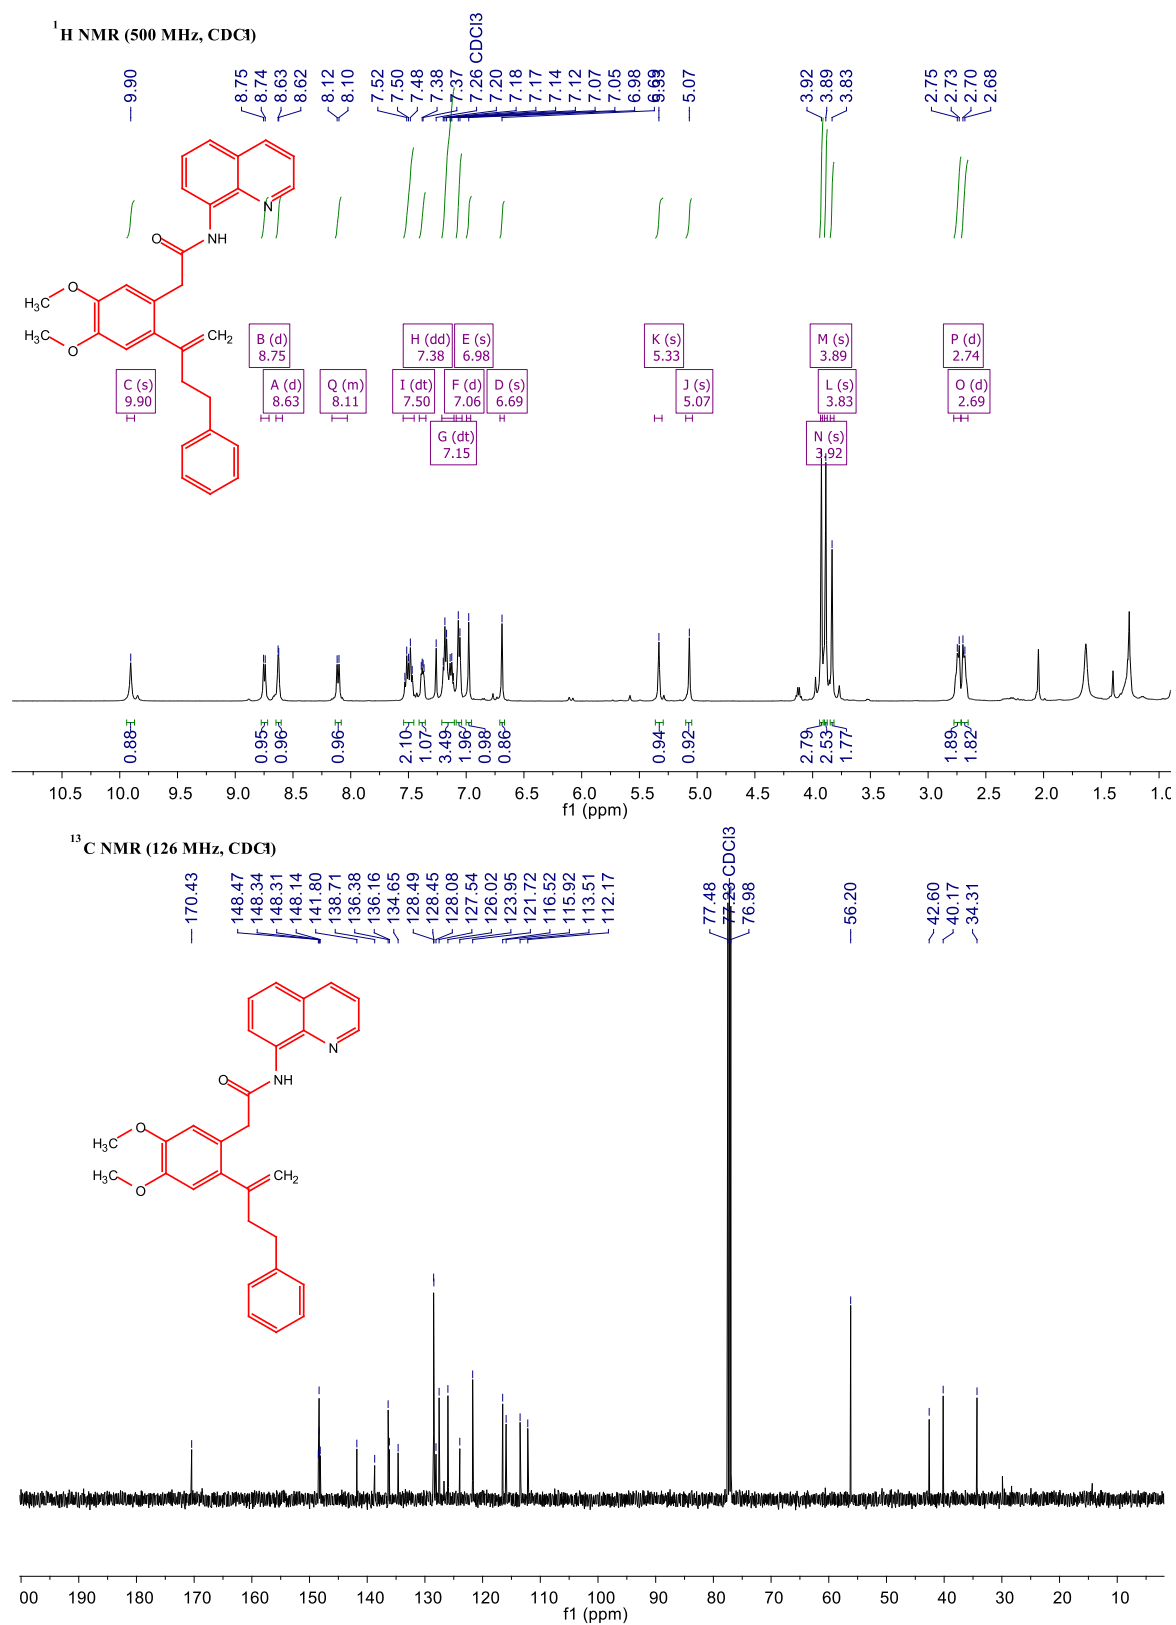

**Scheme 3, entry 4a**

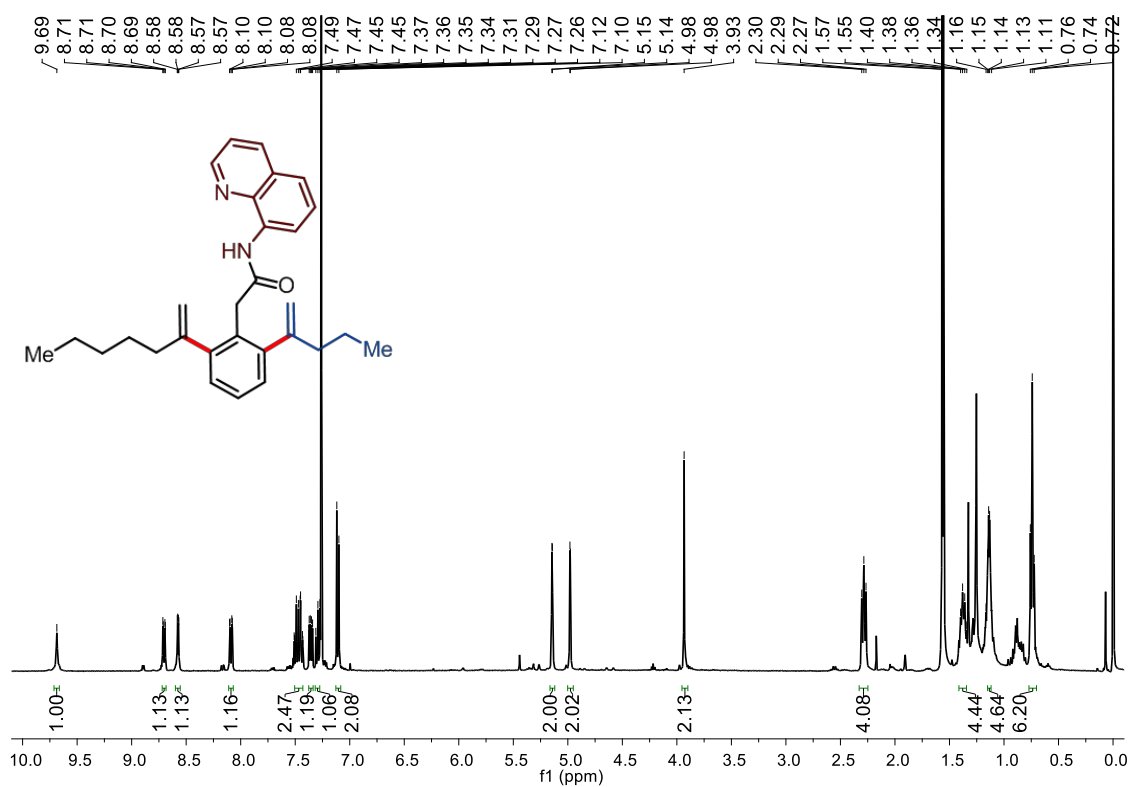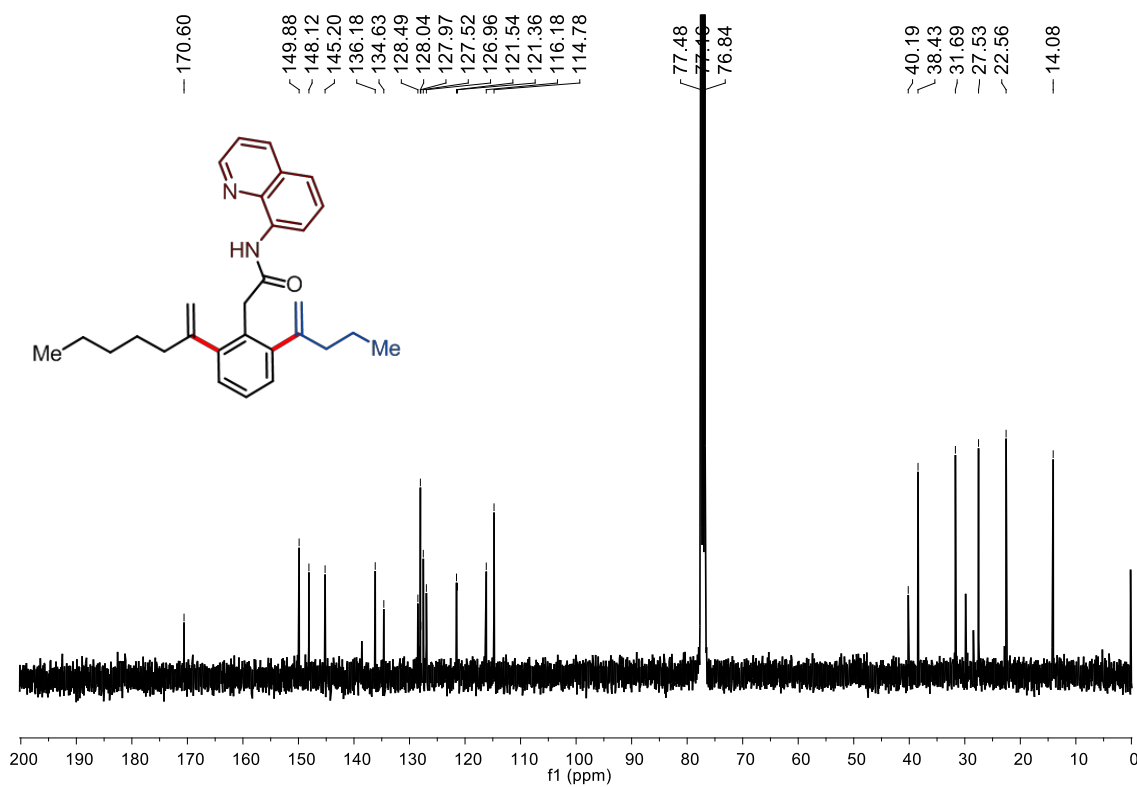

**Scheme 3, entry 4b**

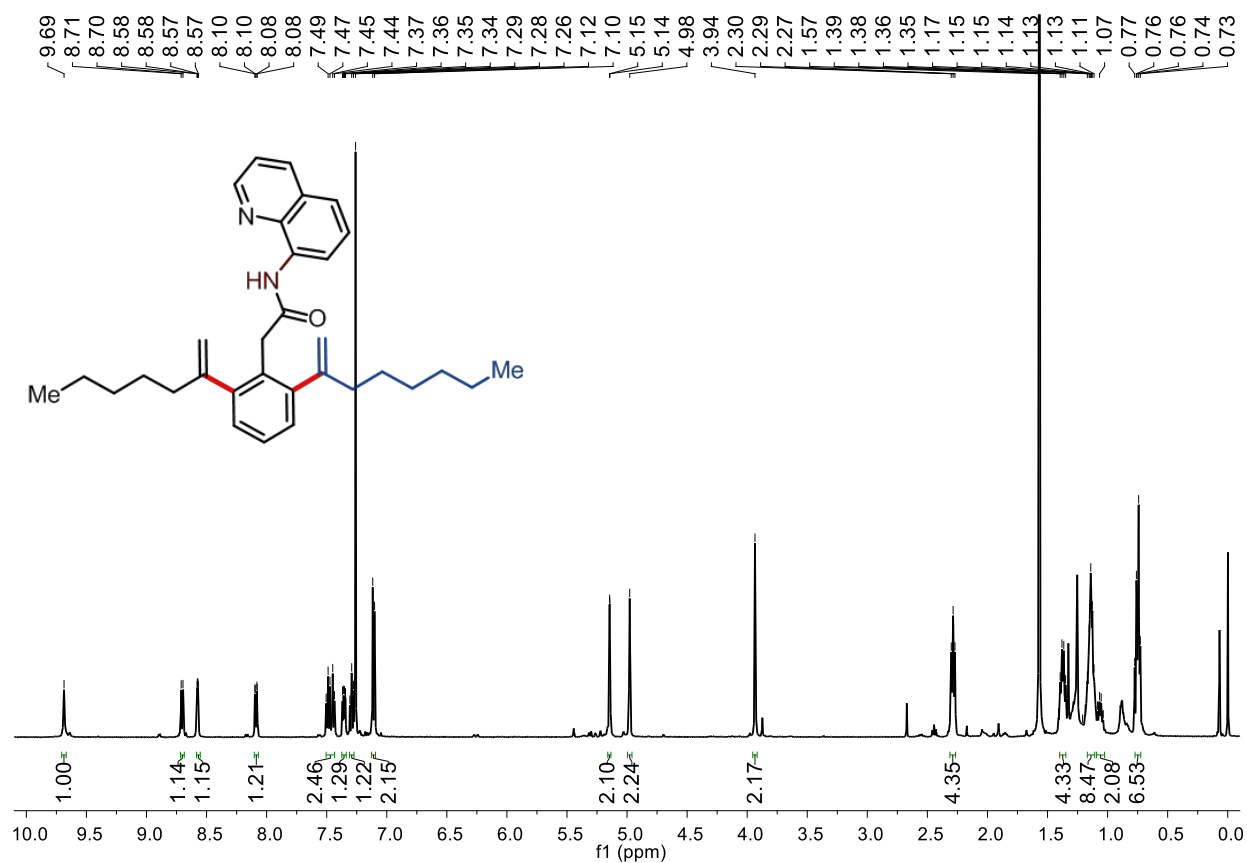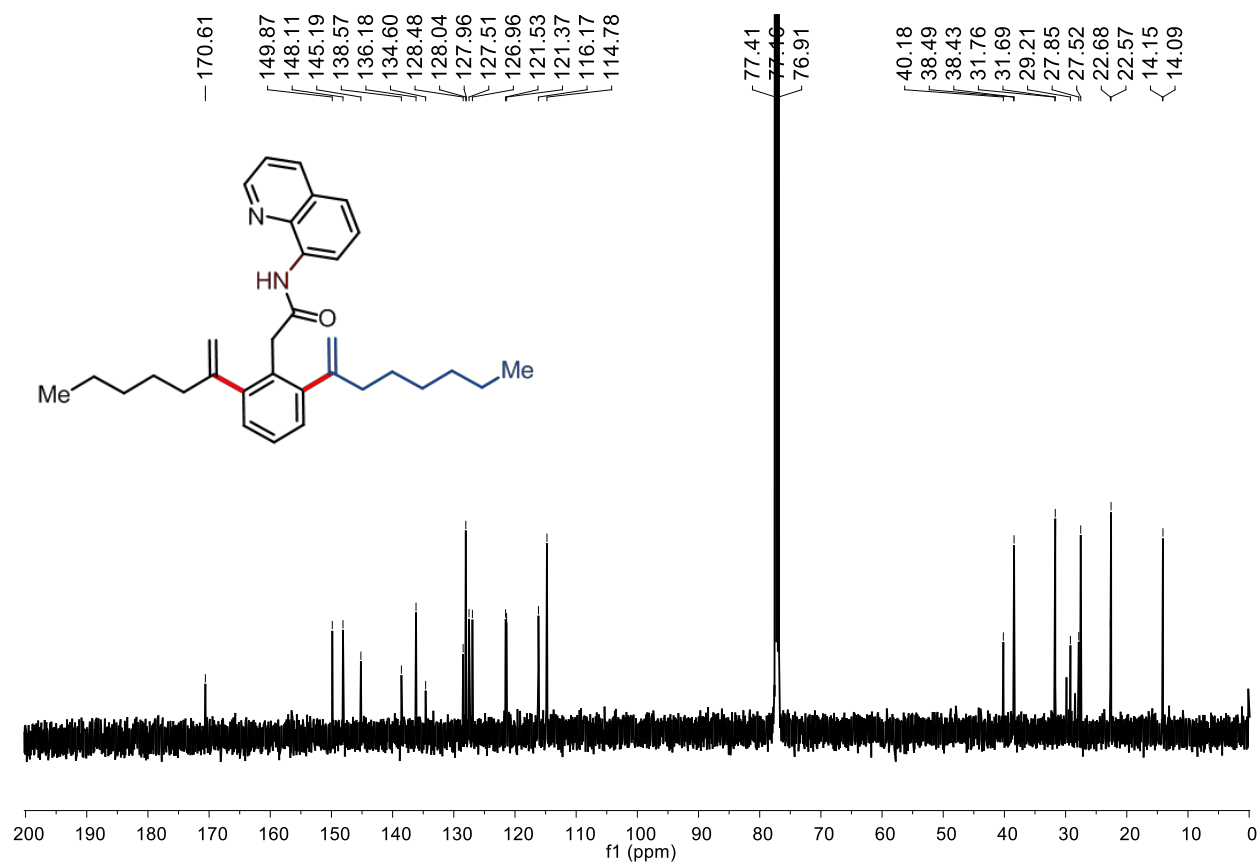

**Scheme 3, entry 4c**

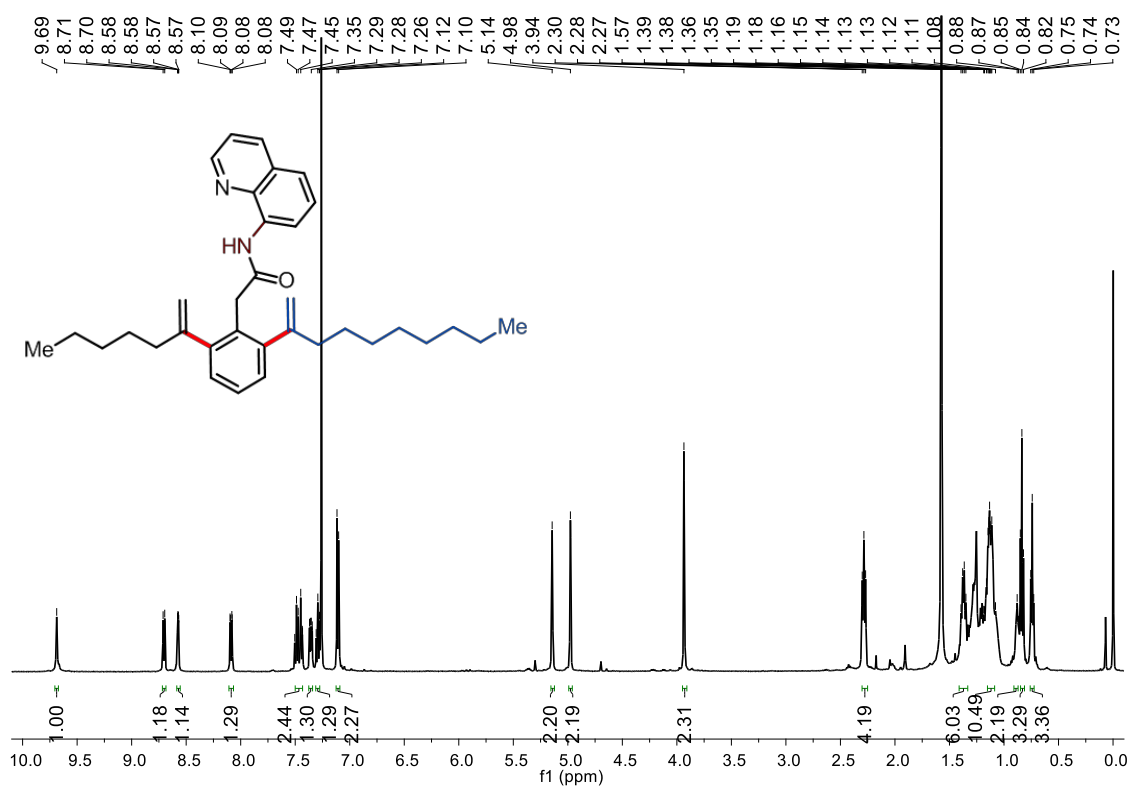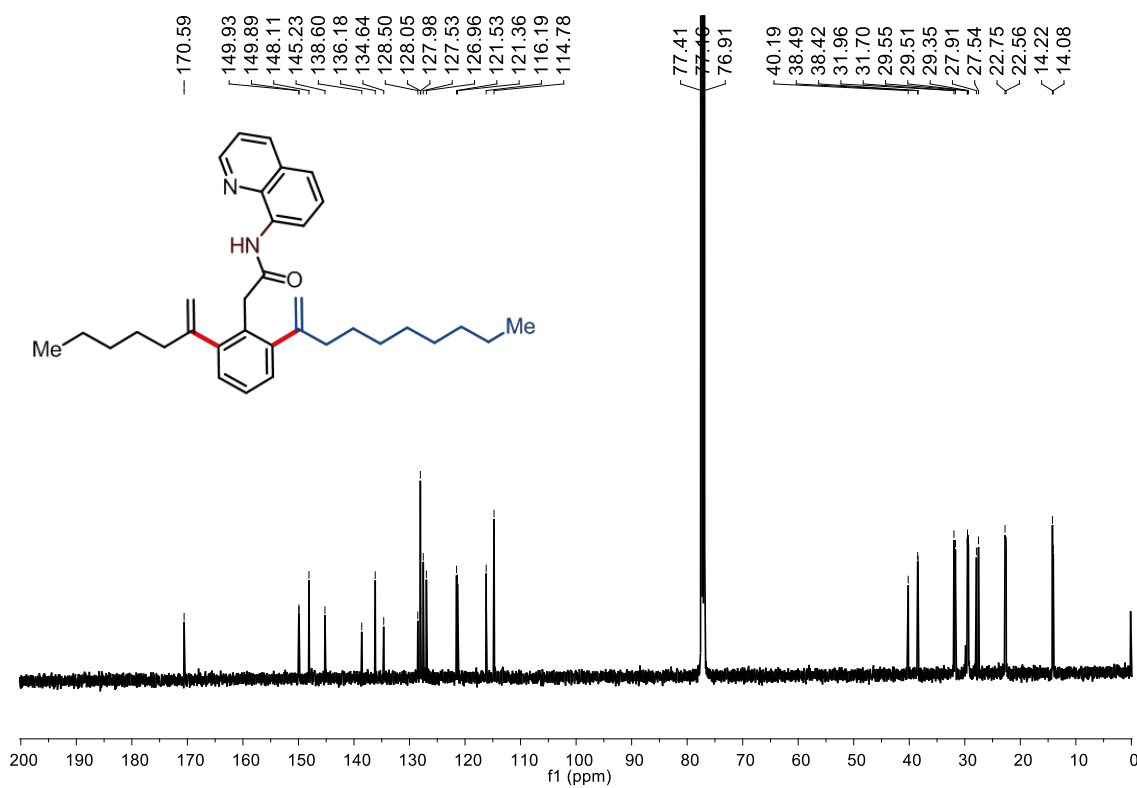



# **Scheme 3, entry 6a**

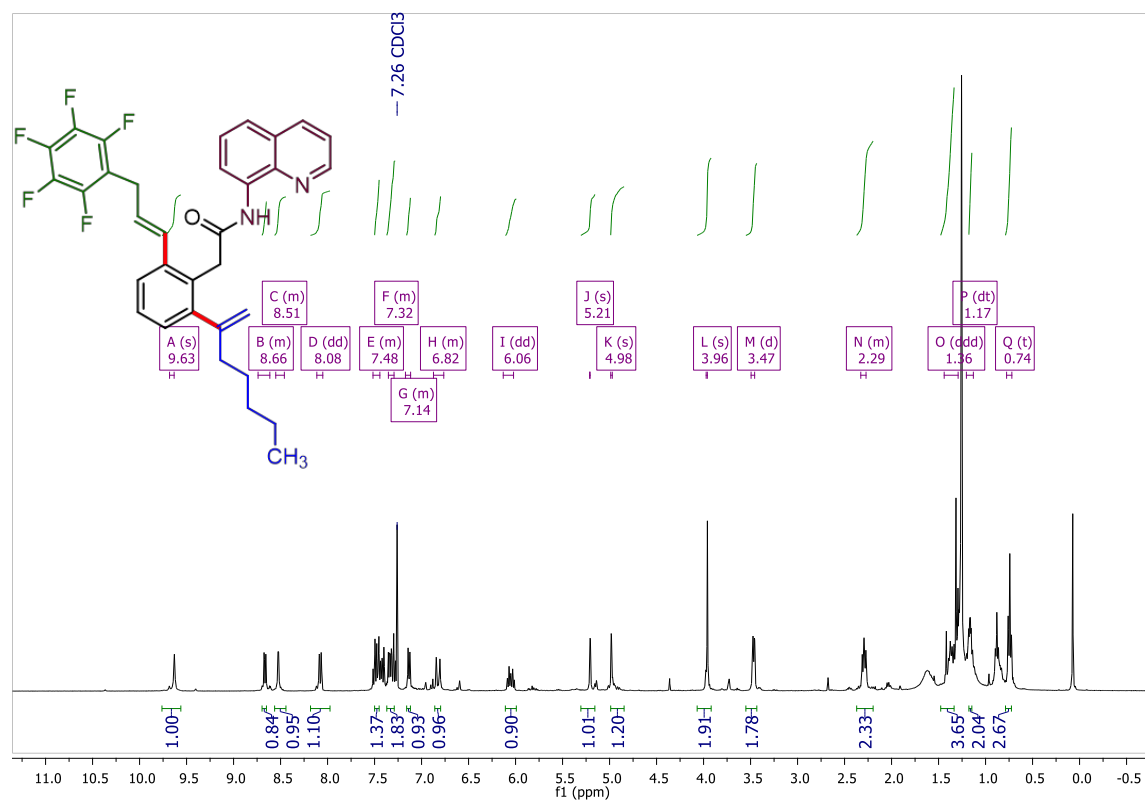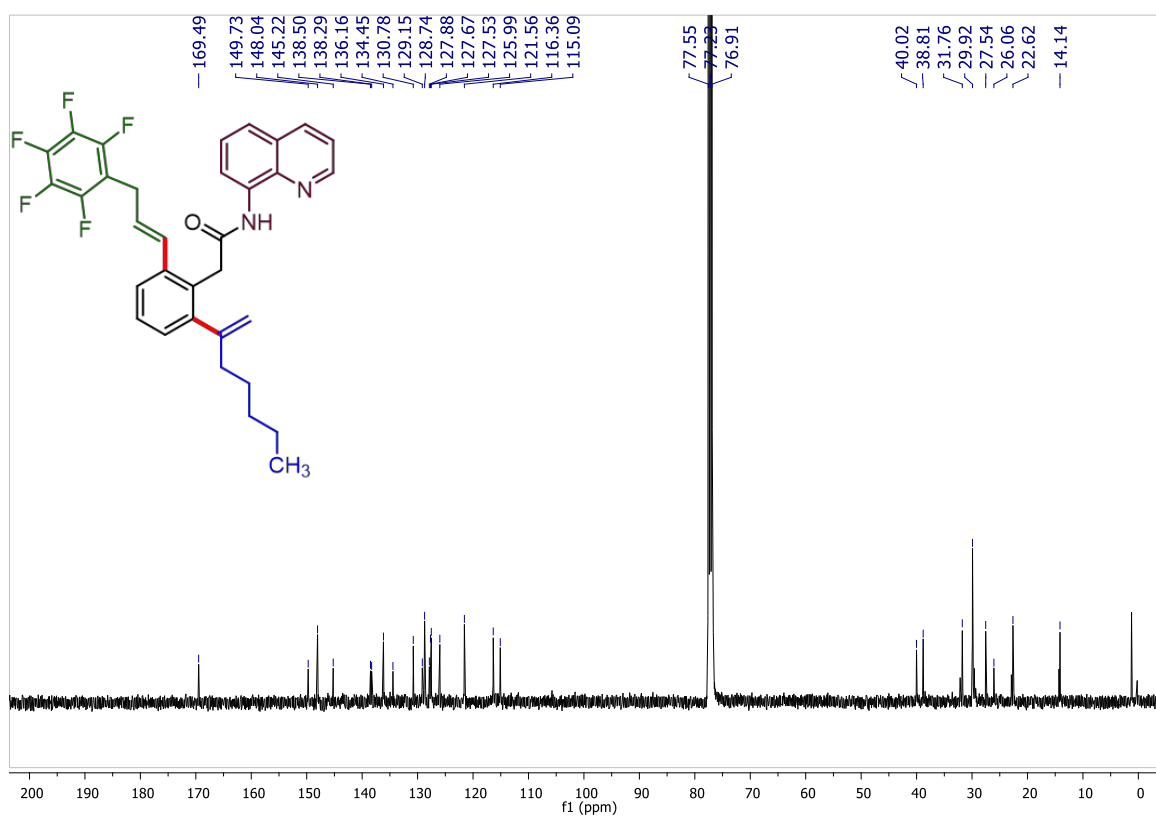

**Scheme 3, entry 6b**

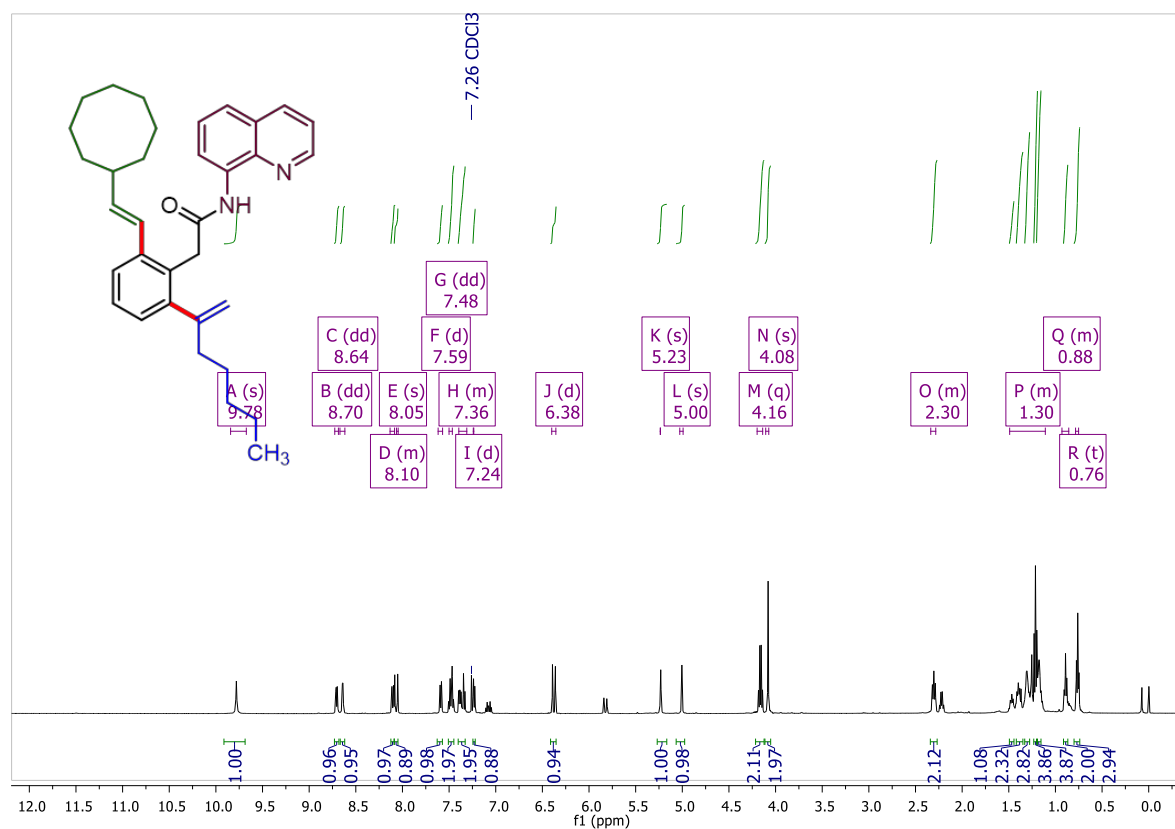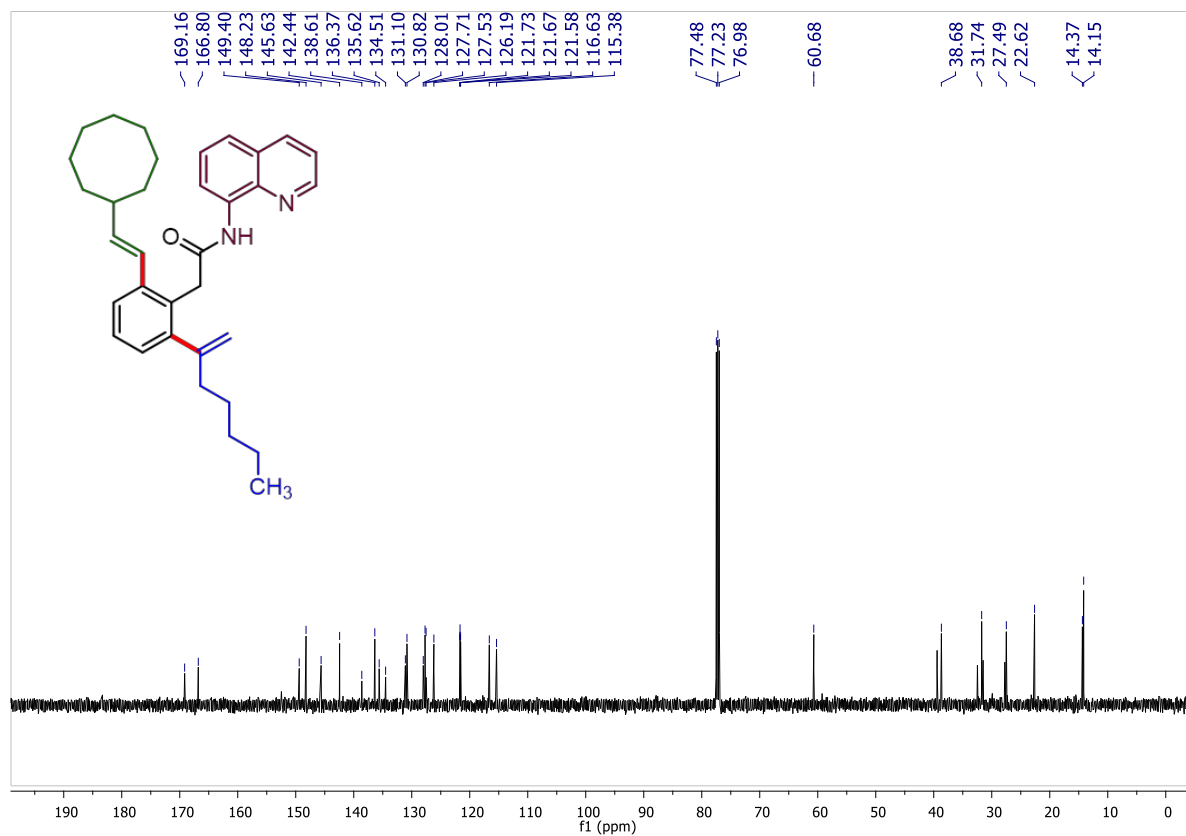

**Scheme 3, entry 6c**

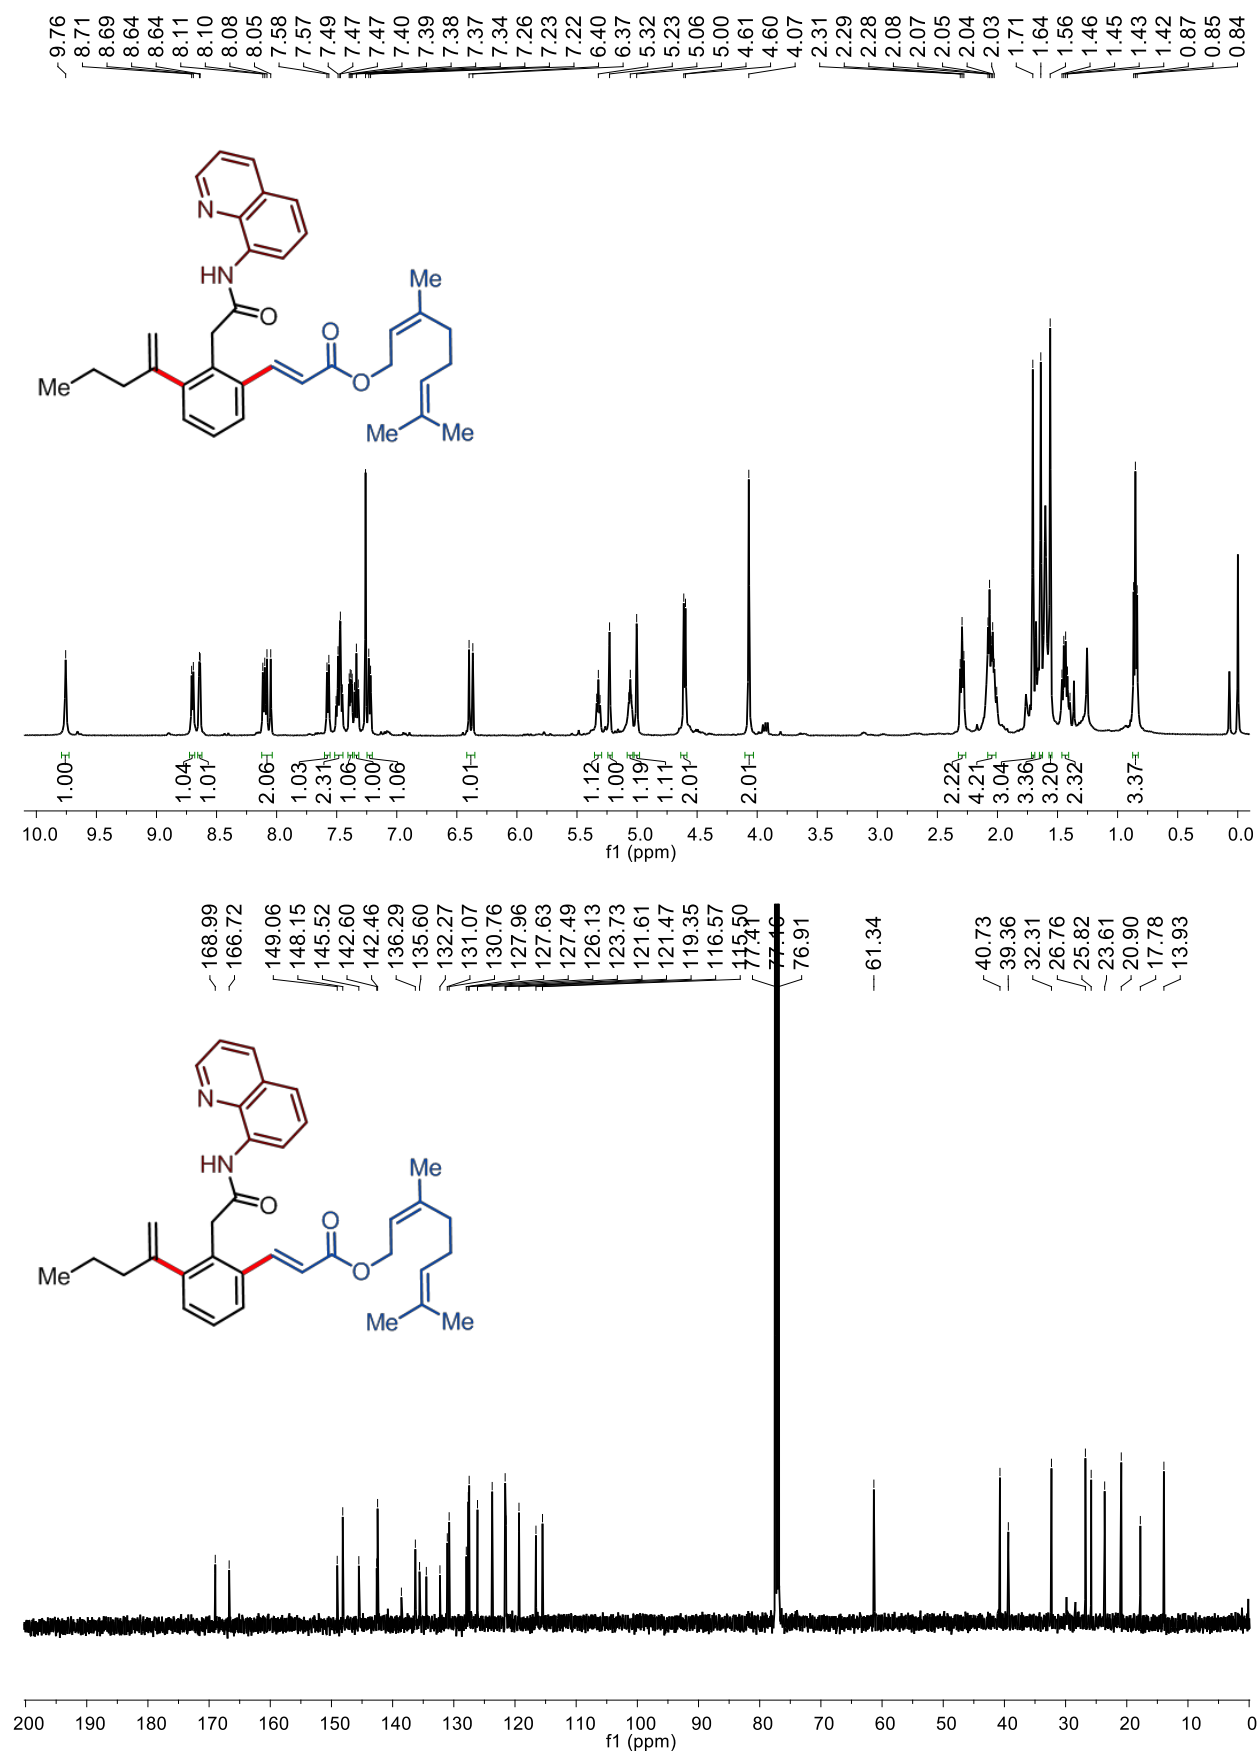

**Scheme 3, entry 6d**

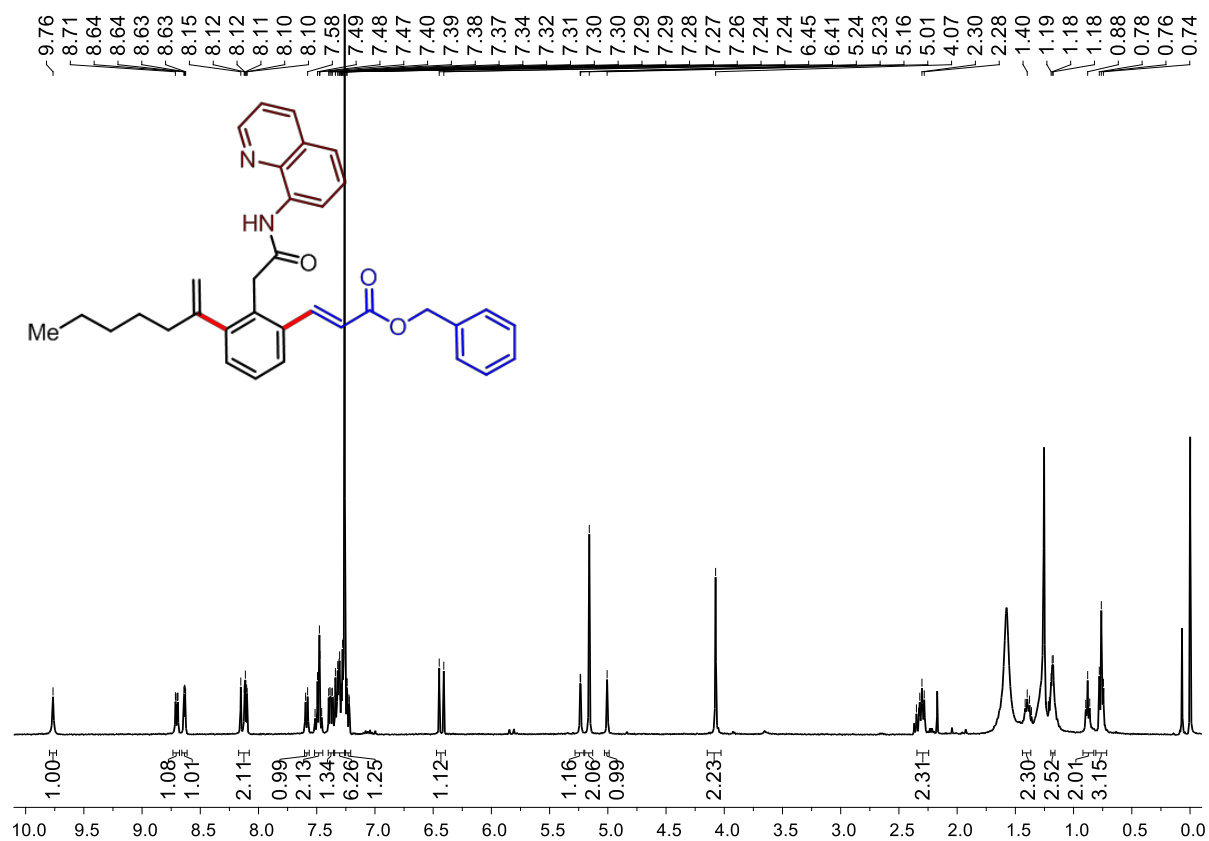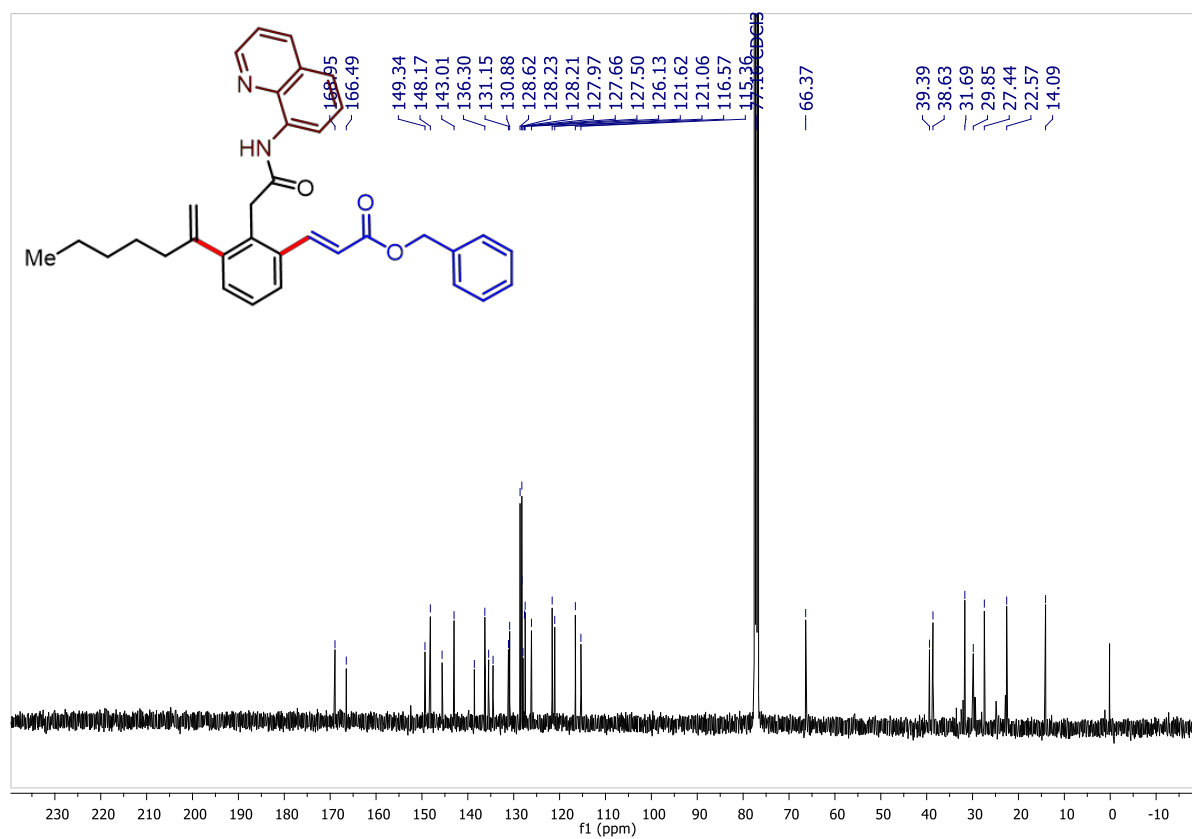

# Scheme 3, entry 6e

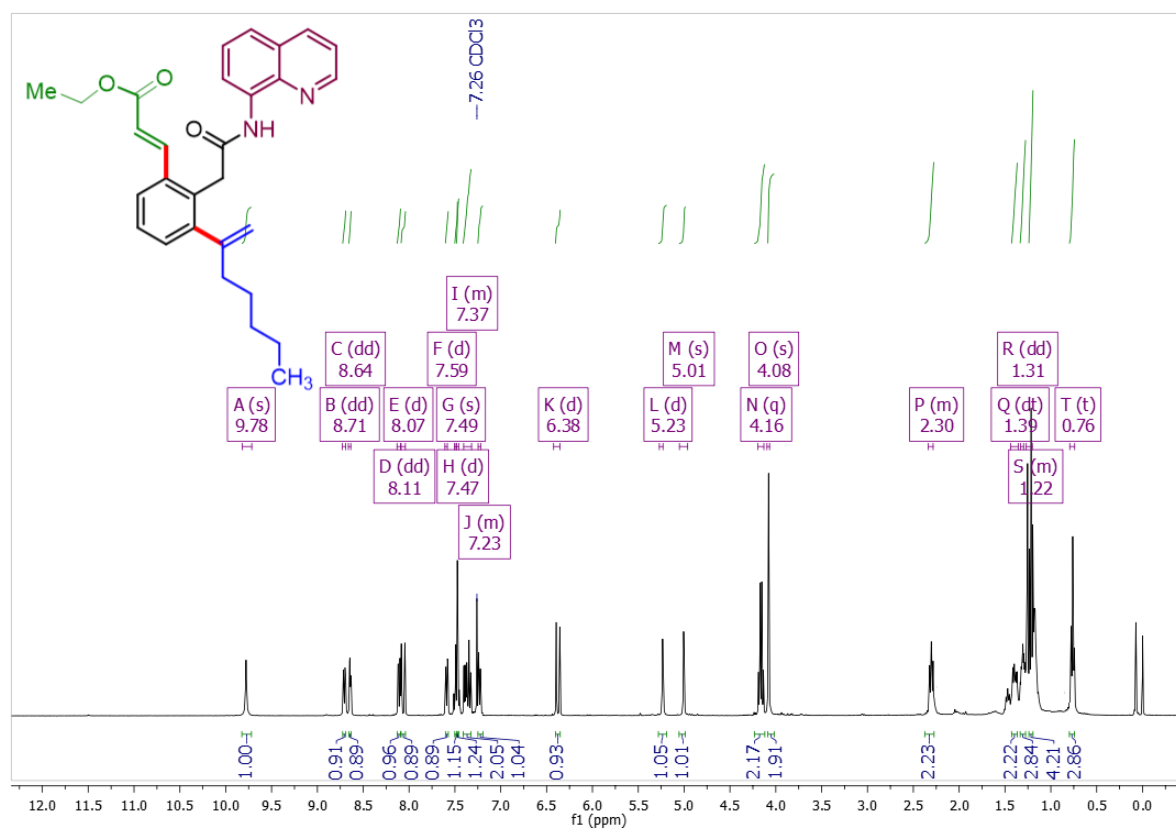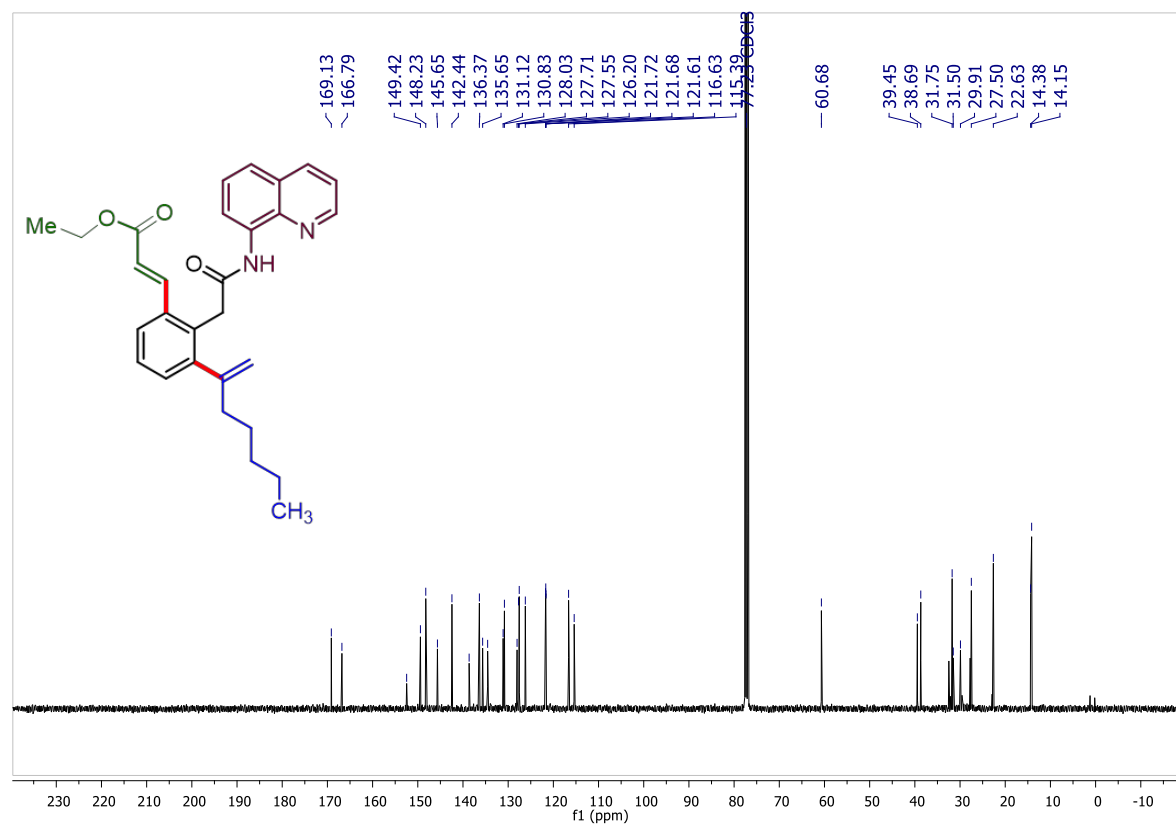

**Scheme 3, entry 6f**

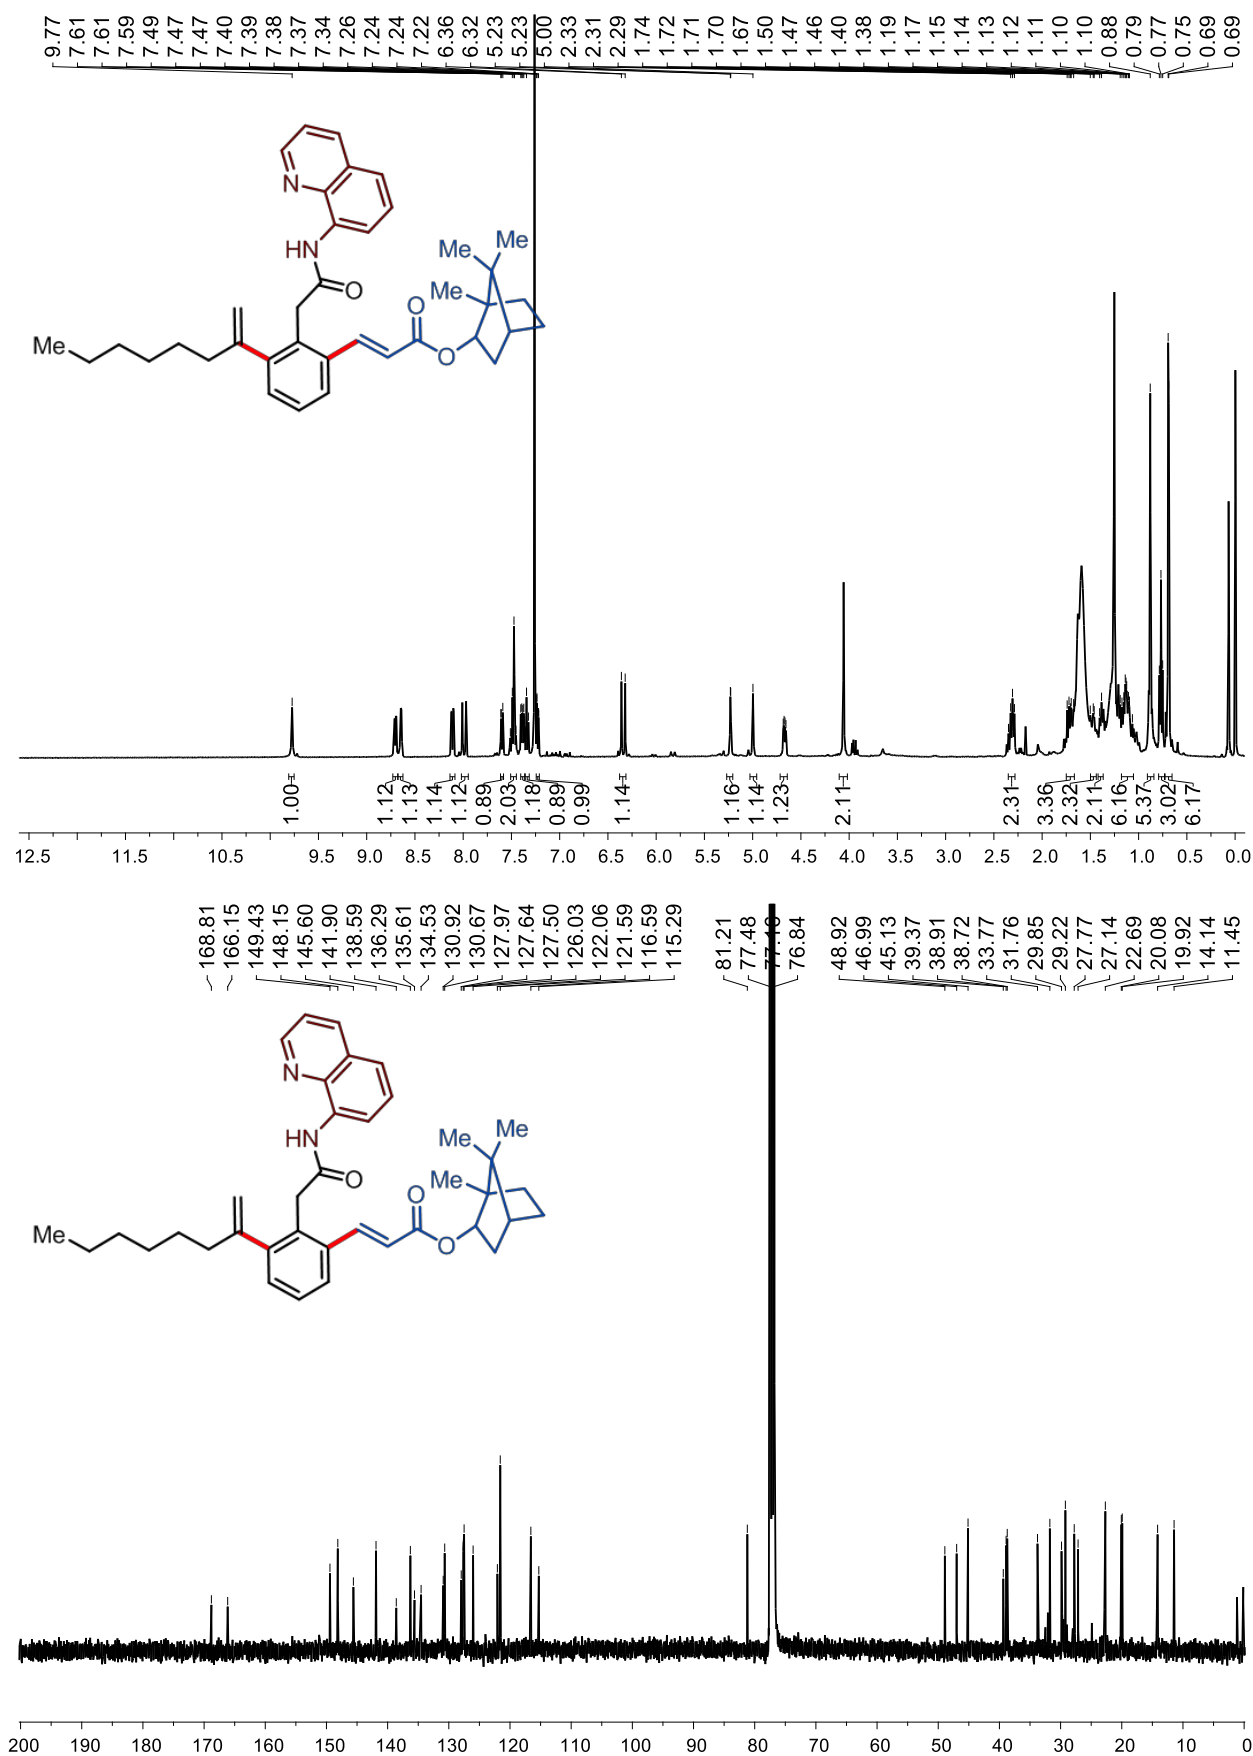

The figure displays the chemical structure of compound 10 and its corresponding <sup>1</sup>H and <sup>13</sup>C NMR spectra. The chemical structure is a complex molecule featuring a quinoxaline ring system, a benzene ring, a furan ring, and a long alkyl chain with multiple methyl groups. The <sup>1</sup>H NMR spectrum (top) shows peaks from 0.84 to 9.82 ppm, with integration values provided below the baseline. The <sup>13</sup>C NMR spectrum (bottom) shows peaks from 11.90 to 168.96 ppm. The chemical structure is color-coded: red for the quinoxaline and benzene rings, blue for the furan ring and alkyl chain, and green for the methyl groups.

**<sup>1</sup>H NMR Spectrum (Top):**

- Chemical Shift Range: 0.84 to 9.82 ppm.
- Integration Values: 1.00, 1.08, 1.08, 1.04, 1.03, 1.05, 2.14, 2.10, 1.00, 1.01, 1.05, 1.02, 2.01, 2.17, 2.25, 3.32, 3.14, 3.27, 8.31, 6.64, 3.33, 3.42, 3.56, 20.46.

**<sup>13</sup>C NMR Spectrum (Bottom):**

- Chemical Shift Range: 11.90 to 168.96 ppm.

# **Scheme 4, Complex C2**

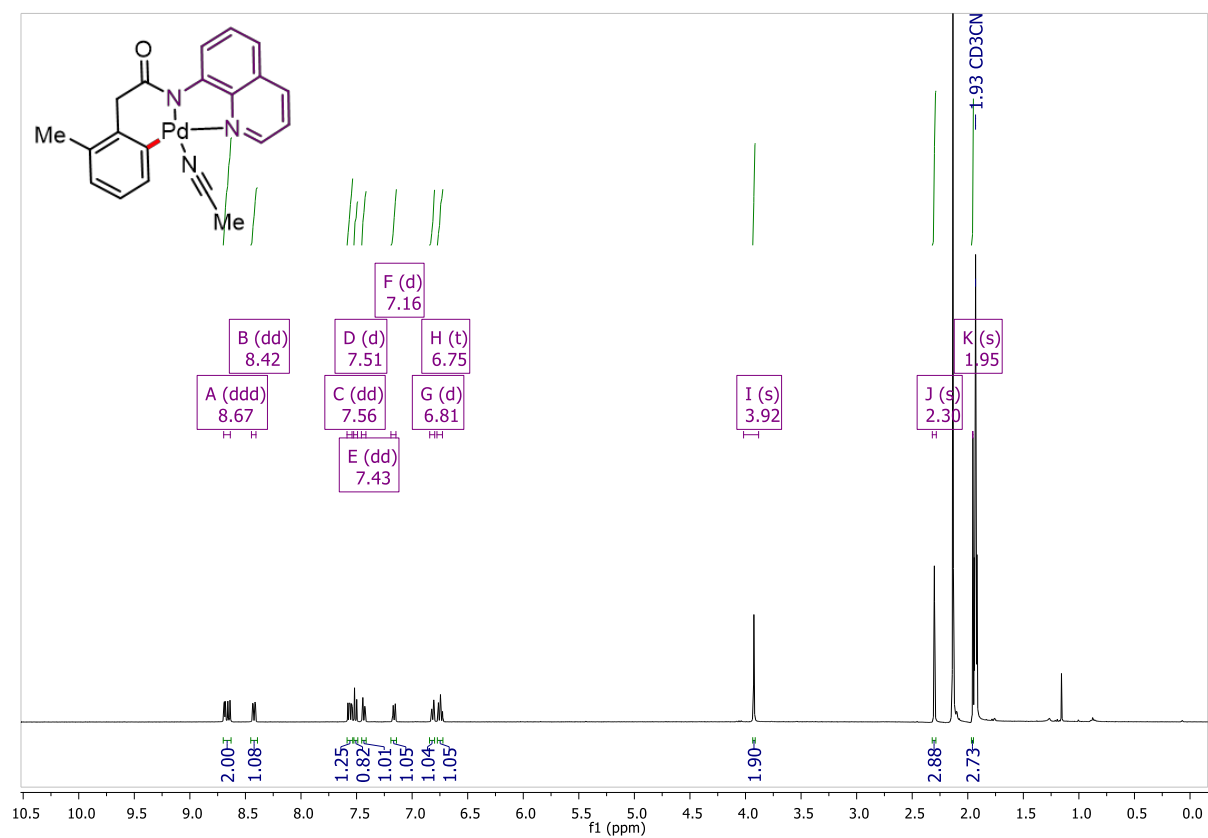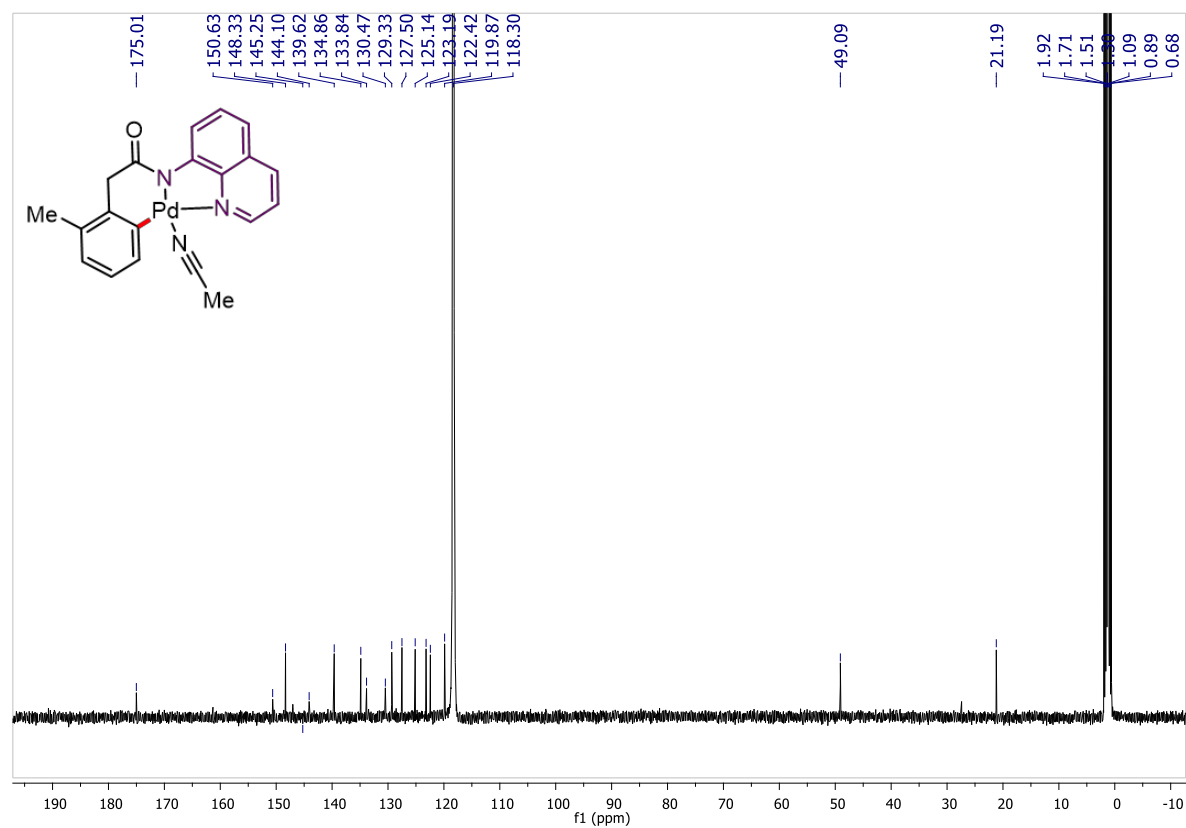



## Complex C3

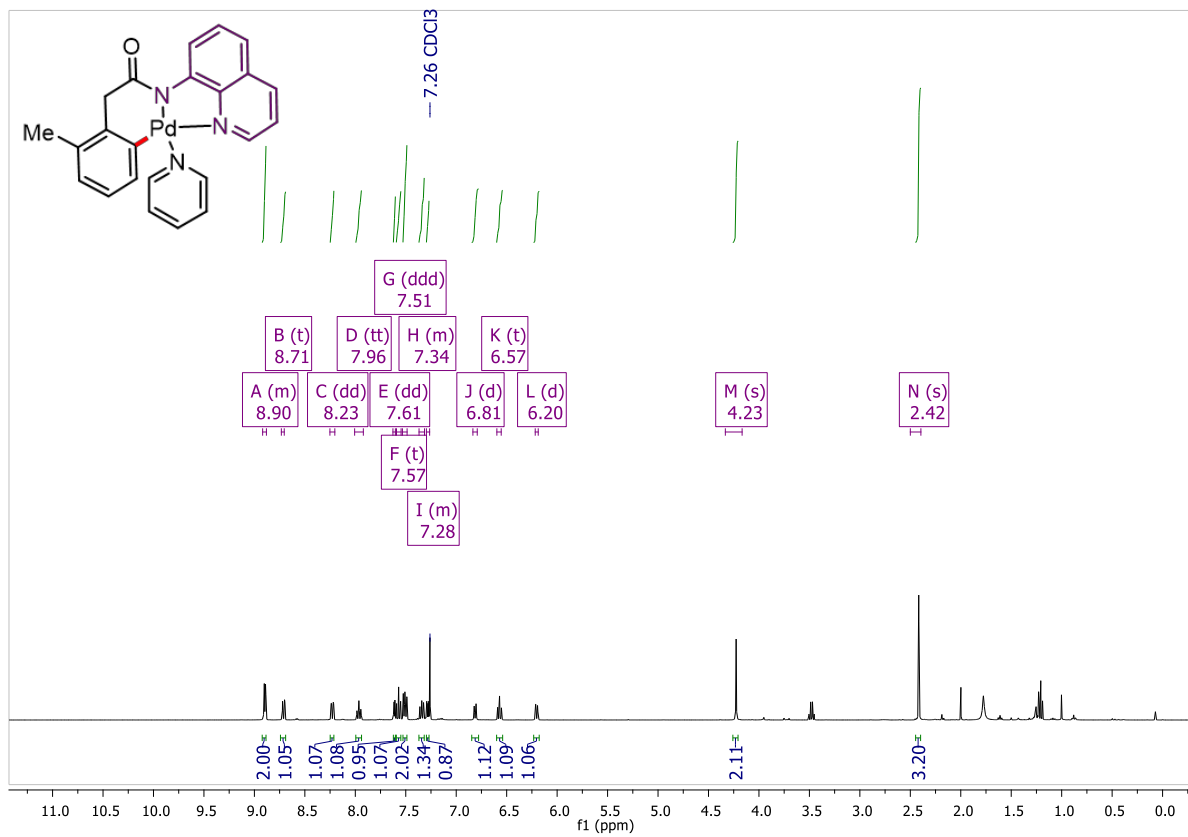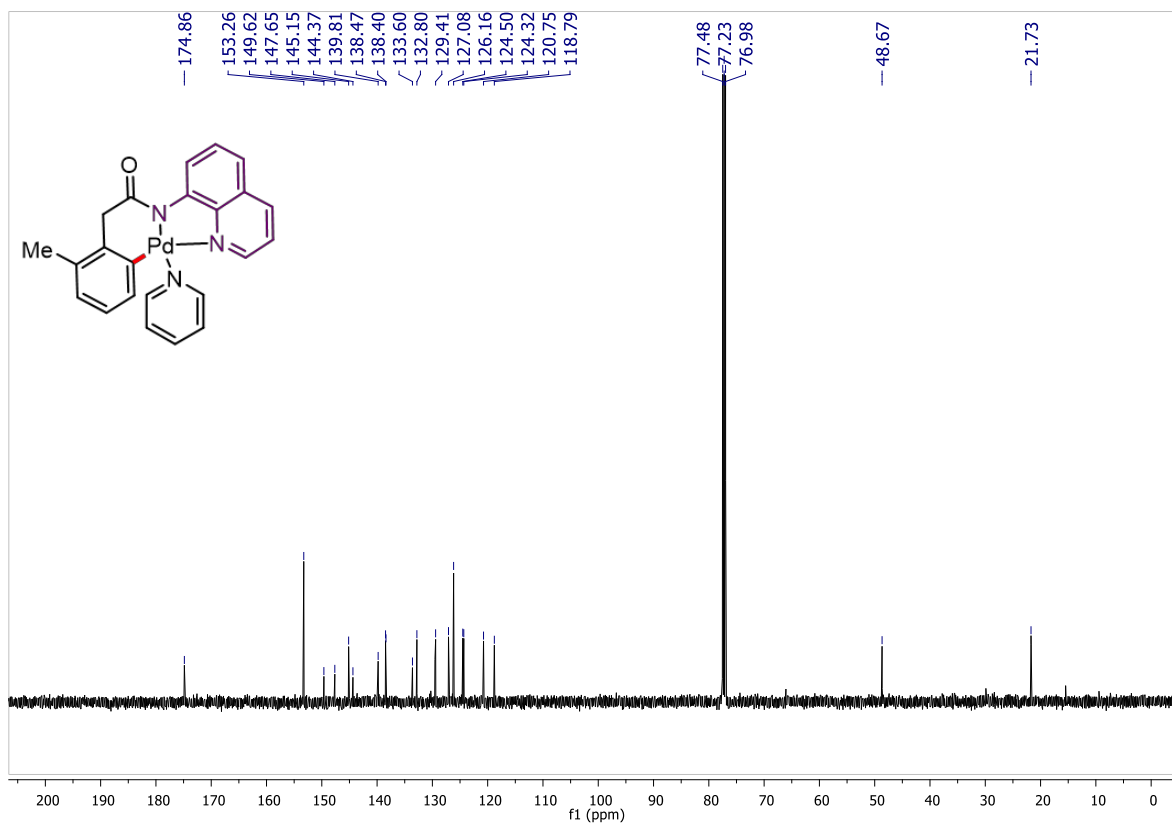

Supplement: Supplementary file 1 [file 17801675]
